# Supplementary material
Source: Research Square preprint supplement (doi:10.21203/rs.3.rs-9475098/v1)
Supplement: Supplementary file 1 [file 21ec00f8d836e43f629aee42.xlsx]

## Sheet: supplementary Table 1
Supplementary Table S1: List of 1984 genotypes used in this study with information about Origin, continent, years of acquisition, growth habit and sample status for YR andLR.
sample.id	ACCENUMB	Origin	SUBREGION	Years of acquisition	Growth habit	Sample Status	YR_Blues	LR_Blues	BioSample ID
GB2_10030	TRI 2175	TUR	Western Asia	1946----	spring type	300	19.58	2.26	SAMEA118763247
GB2_10031	TRI 3450	DEU	Western Europe	1950----	spring type	500	3.58	3.11	SAMEA118763246
GB2_10032	TRI 2888	NPL	Southern Asia	1947----	spring type	300	4.08	5.61	SAMEA118763245
GB2_10033	TRI 2847	CHN	Eastern Asia	1947----	spring type	300	3.58	3.54	SAMEA118763244
GB2_10034	TRI 4353	FRA	Western Europe	1957----	spring type	500	12.58	2.31	SAMEA118763243
GB2_10035	TRI 4920	AUT	Western Europe	1960----	spring type	500	3.58	1.54	SAMEA118763242
GB2_10038	TRI 3034	PRT	Southern Europe	1949----	spring type	500	4.08	4.95	SAMEA118763239
GB2_10039	TRI 2516	CHN	Eastern Asia	1947----	spring type	300	7.43	1.68	SAMEA118763238
GB2_10040	TRI 2451	NPL	Southern Asia	1947----	spring type	300	3.58	8.54	SAMEA118763237
GB2_10042	TRI 3215	NPL	Southern Asia	1947----	spring type	300	3.91	7.99	SAMEA118763235
GB2_10043	TRI 2797	AFG	Southern Asia	1947----	spring type	300	3.78	9.18	SAMEA118763234
GB2_10044	TRI 2504	CHN	Eastern Asia	1947----	spring type	300	3.58	3.89	SAMEA118763233
GB2_10046	TRI 2601	CHN	Eastern Asia	1947----	spring type	300	3.58	3.18	SAMEA118763231
GB2_10047	TRI 4929	ITA	Southern Europe	1960----	spring type	500	8.24	10.32	SAMEA118763230
GB2_10048	TRI 2740	CHN	Eastern Asia	1947----	spring type	300	3.58	6.32	SAMEA118763229
GB2_10049	TRI 2082	GRC	Southern Europe	1946----	spring type	300	6.41	11.61	SAMEA118763228
GB2_10052	TRI 2617	AFG	Southern Asia	1947----	spring type	300	12.72	5.61	SAMEA118763225
GB2_10053	TRI 2452	NPL	Southern Asia	1947----	spring type	300	3.58	9.32	SAMEA118763224
GB2_10054	TRI 2143	GRC	Southern Europe	1946----	spring type	300	7.43	1.32	SAMEA118763223
GB2_10056	TRI 2267	GRC	Southern Europe	1946----	spring type	300	4.91	4.61	SAMEA118763221
GB2_10058	TRI 3568	PRT	Southern Europe	1949----	spring type	300	11.05	9.18	SAMEA118763219
GB2_10059	TRI 2269	GRC	Southern Europe	1946----	spring type	300	8.89	10.99	SAMEA118763218
GB2_10060	TRI 2684	IND	Southern Asia	1947----	spring type	300	11.89	3.18	SAMEA118763217
GB2_10061	TRI 3083	PRT	Southern Europe	1949----	spring type	100	12.72	5.89	SAMEA118763216
GB2_10062	TRI 2507	CHN	Eastern Asia	1947----	spring type	300	8.72	3.04	SAMEA118763215
GB2_10064	TRI 2737	AFG	Southern Asia	1947----	spring type	300	11.29	4.04	SAMEA118763213
GB2_10065	TRI 3130	USA	Northern America	1949----	spring type	500	8.72	2.75	SAMEA118763212
GB2_10066	TRI 2076	GRC	Southern Europe	1946----	spring type	300	8.72	10.61	SAMEA118763211
GB2_10067	TRI 3122	USA	Northern America	1949----	spring type	500	13.72	4.61	SAMEA118763210
GB2_10069	TRI 3177	PRT	Southern Europe	1949----	spring type	500	8.72	2.37	SAMEA118763208
GB2_10071	TRI 3664	DEU	Western Europe	1953----	spring type	500	9.86	1.37	SAMEA118763207
GB2_10072	TRI 4560	ITA	Southern Europe	1957----	spring type	500	10.29	3.23	SAMEA118763206
GB2_10075	TRI 2705	CHN	Eastern Asia	1947----	spring type	300	8.72	4.13	SAMEA118763203
GB2_10077	TRI 2675	AFG	Southern Asia	1947----	spring type	300	9	2.09	SAMEA118763201
GB2_10078	TRI 7569	AUS	Australia and New Zealand	1966----	spring type	500	22.72	1.8	SAMEA118763200
GB2_10079	TRI 7226	NZL	Australia and New Zealand	1964----	spring type	500	8.72	3.8	SAMEA118763199
GB2_10080	TRI 8596	AUT	Western Europe	1966----	spring type	300	8.72	6.09	SAMEA118763198
GB2_10081	TRI 6146	IRN	Southern Asia	1959----	spring type	300	8.72	3.3	SAMEA118763197
GB2_10082	TRI 8191	ITA	Southern Europe	1966----	spring type	500	8.72	4.66	SAMEA118763280
GB2_10465	TRI 2594	IND	Southern Asia	1947----	spring type	300	9.01	-0.82	SAMEA118763641
GB2_10466	TRI 2095	GRC	Southern Europe	1946----	spring type	300	9.01	1.61	SAMEA118763640
GB2_10469	TRI 7142	USA	Northern America	1963----	spring type	500	9.01	4.75	SAMEA118763637
GB2_10470	TRI 6252	IRN	Southern Asia	1959----	spring type	300	9.01	4.78	SAMEA118763636
GB2_10471	TRI 6003	IRN	Southern Asia	1959----	spring type	300	9.01	1.89	SAMEA118763635
GB2_10472	TRI 8570	AUT	Western Europe	1966----	spring type	300	9.01	2.46	SAMEA118759701
GB2_10473	TRI 5821	IRN	Southern Asia	1959----	spring type	300	9.01	1.51	SAMEA118763634
GB2_10474	TRI 8239	MEX	Central America	1966----	spring type	500	9.01	-0.11	SAMEA118763633
GB2_10475	TRI 6246	IRN	Southern Asia	1959----	spring type	300	9.01	4.61	SAMEA118763632
GB2_10476	TRI 6287	IRN	Southern Asia	1959----	spring type	300	9.01	1.04	SAMEA118763631
GB2_10477	TRI 5986	IRN	Southern Asia	1959----	spring type	300	9.01	-0.53	SAMEA118763630
GB2_10478	TRI 6054	IRN	Southern Asia	1959----	spring type	300	9.01	7.89	SAMEA118763629
GB2_10479	TRI 8201	KEN	Eastern Africa	1966----	spring type	500	9.01	3.89	SAMEA118763628
GB2_10480	TRI 4085	CHN	Eastern Asia	1955----	spring type	500	9.01	8.61	SAMEA118763627
GB2_10481	TRI 2799	IND	Southern Asia	1947----	spring type	300	9.01	5.18	SAMEA118763626
GB2_10482	TRI 4895	IND	Southern Asia	1947----	spring type	300	9.01	7.47	SAMEA118763625
GB2_10483	TRI 3617	PRT	Southern Europe	1949----	spring type	500	9.01	10.32	SAMEA118763624
GB2_10484	TRI 3512	IND	Southern Asia	1949----	spring type	500	9.01	6.75	SAMEA118763623
GB2_10485	TRI 2889	NPL	Southern Asia	1947----	spring type	300	9.01	7.47	SAMEA118763622
GB2_10486	TRI 4545	AUT	Western Europe	1959----	spring type	500	2.85	8.89	SAMEA118763621
GB2_10487	TRI 2500	CHN	Eastern Asia	1947----	spring type	300	2.89	6.56	SAMEA118763620
GB2_10488	TRI 3399	IND	Southern Asia	1947----	spring type	300	1.47	7.61	SAMEA118763619
GB2_10489	TRI 3299	CHN	Eastern Asia	1947----	spring type	300	1.68	7.47	SAMEA118763618
GB2_10490	TRI 3276	AFG	Southern Asia	1947----	spring type	300	2.32	3.23	SAMEA118763617
GB2_10491	TRI 3528	FRA	Western Europe	1949----	spring type	500	0.47	2.61	SAMEA118763616
GB2_10492	TRI 2595	CHN	Eastern Asia	1947----	spring type	300	0.68	5.89	SAMEA118763615
GB2_10494	TRI 2763	CHN	Eastern Asia	1947----	spring type	300	0.18	7.18	SAMEA118763613
GB2_10495	TRI 3983	CHN	Eastern Asia	1953----	spring type	300	15.47	3.64	SAMEA118763612
GB2_10496	TRI 7574	AUS	Australia and New Zealand	1966----	spring type	500	5.18	1.47	SAMEA118763611
GB2_10497	TRI 3531	IND	Southern Asia	1949----	spring type	500	14.85	12.47	SAMEA118763610
GB2_10498	TRI 2755	CHN	Eastern Asia	1947----	spring type	300	1.61	10.33	SAMEA118763609
GB2_10500	TRI 2478	CHN	Eastern Asia	1947----	spring type	300	2.18	1.88	SAMEA118763607
GB2_10502	TRI 4138	ITA	Southern Europe	1951----	spring type	300	9.89	4.47	SAMEA118763605
GB2_10503	TRI 3121	PRT	Southern Europe	1949----	spring type	500	10.89	8.62	SAMEA118763604
GB2_10504	TRI 7288	USA	Northern America	1963----	spring type	500	3.47	-1.53	SAMEA118763603
GB2_10505	TRI 2854	IND	Southern Asia	1947----	spring type	300	15.75	-0.29	SAMEA118763602
GB2_10506	TRI 6109	IRN	Southern Asia	1959----	spring type	300	7.04	-0.62	SAMEA118763601
GB2_10508	TRI 6303	IRN	Southern Asia	1959----	spring type	300	17.75	5.71	SAMEA118763599
GB2_10509	TRI 6157	IRN	Southern Asia	1959----	spring type	300	2.85	6.38	SAMEA118763598
GB2_10510	TRI 2582	CHN	Eastern Asia	1947----	spring type	300	9.57	2.9	SAMEA118763597
GB2_10511	TRI 3841	ITA	Southern Europe	1949----	spring type	500	14	6.04	SAMEA118763596
GB2_10513	TRI 8457	DEU	Western Europe	1968----	spring type	500	1.19	6.04	SAMEA118763594
GB2_10514	TRI 4542	RUS	Eastern Europe	1959----	spring type	100	28.69	4.33	SAMEA118763593
GB2_10515	TRI 5360	ARG	South America	1957----	spring type	500	0.14	-1.96	SAMEA118763592
GB2_10516	TRI 850	DEU	Western Europe	1947----	spring type	500	1.86	4.04	SAMEA118763591
GB2_10517	TRI 501	ITA	Southern Europe	1946----	spring type	500	1	2.38	SAMEA118763590
GB2_10518	TRI 3401	DEU	Western Europe	1950----	spring type	500	12	5.62	SAMEA118763589
GB2_10519	TRI 2992	NPL	Southern Asia	1947----	spring type	300	11.14	10.39	SAMEA118763588
GB2_10520	TRI 429	USA	Northern America	1946----	spring type	500	2.57	1.1	SAMEA118763587
GB2_10521	TRI 2853	NPL	Southern Asia	1947----	spring type	300	7.06	8.67	SAMEA118763586
GB2_10522	TRI 5316	PRT	Southern Europe	1957----	spring type	500	5.19	5.81	SAMEA118763585
GB2_10524	TRI 1937	TUR	Western Asia	1946----	spring type	300	6.14	6.39	SAMEA118763583
GB2_10525	TRI 2916	AFG	Southern Asia	1947----	spring type	300	29.19	3.96	SAMEA118763582
GB2_10526	TRI 3021	USA	Northern America	1949----	spring type	500	4.36	3.72	SAMEA118763581
GB2_10527	TRI 3943	CHN	Eastern Asia	1947----	spring type	300	0.69	11.05	SAMEA118763580
GB2_10529	TRI 3900	ITA	Southern Europe	1949----	spring type	500	4.14	0.39	SAMEA118763578
GB2_10530	TRI 2640	IND	Southern Asia	1947----	spring type	300	10.86	12.72	SAMEA118763577
GB2_10531	TRI 5655	IRN	Southern Asia	1959----	spring type	300	9.02	8.67	SAMEA118763576
GB2_10533	TRI 2598	IND	Southern Asia	1947----	spring type	300	6.52	13.1	SAMEA118763574
GB2_10535	TRI 2604	IND	Southern Asia	1947----	spring type	300	9	7.1	SAMEA118763572
GB2_10536	TRI 2665	AFG	Southern Asia	1947----	spring type	300	9	8.53	SAMEA118763571
GB2_10537	TRI 2114	GRC	Southern Europe	1946----	spring type	300	9	5.39	SAMEA118763570
GB2_10539	TRI 4022	NPL	Southern Asia	1947----	spring type	300	9	10.53	SAMEA118763568
GB2_10541	TRI 3104	PRT	Southern Europe	1949----	spring type	500	9	11.22	SAMEA118763566
GB2_10542	TRI 530	IND	Southern Asia	1946----	spring type	500	9	7.96	SAMEA118763565
GB2_10544	TRI 972	NA	NA	1947----	spring type	500	9	0.39	SAMEA118763563
GB2_10545	TRI 5684	IRN	Southern Asia	1959----	spring type	300	9	5.22	SAMEA118763562
GB2_10546	TRI 3272	CHN	Eastern Asia	1947----	spring type	300	9	3.11	SAMEA118763561
GB2_10547	TRI 4040	AFG	Southern Asia	1951----	spring type	300	9	3.11	SAMEA118763560
GB2_10549	TRI 907	NA	NA	1947----	spring type	100	9	3.61	SAMEA118763558
GB2_10550	TRI 2482	IND	Southern Asia	1947----	spring type	300	9	2.73	SAMEA118763557
GB2_10551	TRI 4165	AFG	Southern Asia	1959----	spring type	300	9	9.16	SAMEA118763556
GB2_10552	TRI 519	IND	Southern Asia	1946----	spring type	500	9	4.01	SAMEA118763645
GB2_10553	TRI 2419	CHN	Eastern Asia	1947----	spring type	300	9	7.61	SAMEA118763555
GB2_10554	TRI 2690	IND	Southern Asia	1947----	spring type	300	9	6.16	SAMEA118763554
GB2_10555	TRI 2184	TUR	Western Asia	1946----	spring type	300	9	5.01	SAMEA118763004
GB2_10556	TRI 2090	GRC	Southern Europe	1946----	spring type	300	9.5	5.28	SAMEA118763003
GB2_10557	TRI 3551	AFG	Southern Asia	1947----	spring type	300	9	9.28	SAMEA118763002
GB2_10558	TRI 2627	CHN	Eastern Asia	1947----	spring type	300	9	9.87	SAMEA118763001
GB2_10559	TRI 3176	FIN	Northern Europe	1949----	spring type	500	3.05	8.01	SAMEA118763000
GB2_10560	TRI 3279	GRC	Southern Europe	1948----	spring type	300	3.9	8.78	SAMEA118762999
GB2_10562	TRI 6162	IRN	Southern Asia	1959----	spring type	300	6.76	10.61	SAMEA118762998
GB2_10563	TRI 5985	IRN	Southern Asia	1959----	spring type	300	7.05	9.01	SAMEA118762997
GB2_10564	TRI 5350	USA	Northern America	1957----	spring type	500	5.9	4.73	SAMEA118762996
GB2_10565	TRI 7628	RUS	Eastern Europe	1965----	spring type	500	19.48	4.58	SAMEA118762995
GB2_10566	TRI 4301	IND	Southern Asia	1947----	spring type	300	2.38	3.11	SAMEA118762994
GB2_10567	TRI 5576	IRN	Southern Asia	1959----	spring type	300	18.48	1.87	SAMEA118762993
GB2_10725	TRI 2686	CHN	Eastern Asia	1947----	spring type	300	6.81	5.98	SAMEA118762840
GB2_10726	TRI 2709	CHN	Eastern Asia	1947----	spring type	300	2.1	5.84	SAMEA118762839
GB2_10727	TRI 5689	IRN	Southern Asia	1959----	spring type	300	13.81	5.84	SAMEA118762838
GB2_10728	TRI 7210	USA	Northern America	1964----	spring type	500	6.95	5.41	SAMEA118762837
GB2_10729	TRI 5625	IRN	Southern Asia	1959----	spring type	300	2.1	3.13	SAMEA118762836
GB2_10730	TRI 5872	IRN	Southern Asia	1959----	spring type	300	5.9	-0.16	SAMEA118762377
GB2_10731	TRI 5542	IRN	Southern Asia	1959----	spring type	300	21.81	-0.16	SAMEA118762835
GB2_10732	TRI 6083	IRN	Southern Asia	1959----	spring type	300	8.67	0.55	SAMEA118762834
GB2_10733	TRI 2839	IND	Southern Asia	1947----	spring type	300	25.1	11.49	SAMEA118762833
GB2_10734	TRI 3629	CAN	Northern America	1951----	spring type	500	14.1	8.77	SAMEA118762832
GB2_10735	TRI 5876	IRN	Southern Asia	1959----	spring type	300	2.9	9.63	SAMEA118762831
GB2_10736	TRI 5583	IRN	Southern Asia	1959----	spring type	300	10.3	6	SAMEA118762830
GB2_10737	TRI 6036	IRN	Southern Asia	1959----	spring type	300	10.26	8.06	SAMEA118762829
GB2_10738	TRI 5696	IRN	Southern Asia	1959----	spring type	300	24.26	9	SAMEA118762828
GB2_10739	TRI 5490	IRN	Southern Asia	1959----	spring type	300	20.38	5.92	SAMEA118762827
GB2_10740	TRI 5771	IRN	Southern Asia	1959----	spring type	300	2.1	1.92	SAMEA118762915
GB2_11980	TRI 1872	GRC	Southern Europe	1946----	spring type	300	7.61	9.58	SAMEA118759736
GB2_11981	TRI 1874	GRC	Southern Europe	1946----	spring type	300	6.32	5.2	SAMEA118759737
GB2_11982	TRI 1875	GRC	Southern Europe	1946----	spring type	300	7.28	4.7	SAMEA118759738
GB2_11983	TRI 1880	GRC	Southern Europe	1946----	spring type	300	14.28	3.7	SAMEA118759739
GB2_11984	TRI 1906	IND	Southern Asia	1947----	spring type	500	10.68	5.07	SAMEA118759740
GB2_11985	TRI 1910	GRC	Southern Europe	1947----	spring type	300	-0.55	4.3	SAMEA118759741
GB2_11986	TRI 1911	GRC	Southern Europe	1947----	spring type	300	21.28	3.3	SAMEA118759742
GB2_11987	TRI 1913	GRC	Southern Europe	1946----	spring type	300	5.57	5.58	SAMEA118759743
GB2_11988	TRI 1922	TUR	Western Asia	1946----	spring type	300	5.57	3.07	SAMEA118759744
GB2_11989	TRI 1923	TUR	Western Asia	1946----	spring type	300	19.85	3.44	SAMEA118759745
GB2_11990	TRI 1930	GRC	Southern Europe	1946----	spring type	300	23.68	8.71	SAMEA118759746
GB2_11991	TRI 1935	GRC	Southern Europe	1946----	spring type	300	20.62	13.71	SAMEA118759747
GB2_11992	TRI 1938	TUR	Western Asia	1946----	spring type	300	28.95	7.88	SAMEA118759748
GB2_11993	TRI 1941	ARG	South America	1947----	spring type	500	15.45	1.71	SAMEA118759749
GB2_11994	TRI 1942	ARG	South America	1947----	spring type	500	24.57	4.28	SAMEA118759750
GB2_11995	TRI 1945	DEU	Western Europe	1947----	spring type	500	11.28	3.91	SAMEA118759751
GB2_11997	TRI 1952	CAN	Northern America	1947----	spring type	500	16.71	3.54	SAMEA118759752
GB2_11998	TRI 1959	DEU	Western Europe	1947----	spring type	500	13.71	4.28	SAMEA118759735
GB2_11999	TRI 1960	DEU	Western Europe	1947----	spring type	500	-0.22	4.38	SAMEA118759753
GB2_12000	TRI 1969	GRC	Southern Europe	1946----	spring type	300	5.28	7.71	SAMEA118759754
GB2_12001	TRI 1970	GRC	Southern Europe	1946----	spring type	300	6.16	4.14	SAMEA118759755
GB2_12002	TRI 1973	JPN	Eastern Asia	1946----	spring type	300	4.26	4.57	SAMEA118759756
GB2_12003	TRI 1975	GRC	Southern Europe	1946----	spring type	300	4.83	4.28	SAMEA118759757
GB2_12004	TRI 1978	AUT	Western Europe	1947----	spring type	500	10.14	4.28	SAMEA118759758
GB2_12005	TRI 2014	GRC	Southern Europe	1946----	spring type	300	6.69	9.85	SAMEA118759759
GB2_12006	TRI 2016	TUR	Western Asia	1946----	spring type	300	18.26	8.85	SAMEA118759760
GB2_12007	TRI 2036	GRC	Southern Europe	1946----	spring type	300	19.83	8.91	SAMEA118759761
GB2_12008	TRI 2038	GRC	Southern Europe	1946----	spring type	300	26.83	5.28	SAMEA118759762
GB2_12009	TRI 2042	GRC	Southern Europe	1946----	spring type	300	2.4	4.28	SAMEA118759763
GB2_12010	TRI 2045	GRC	Southern Europe	1946----	spring type	300	5.97	5.88	SAMEA118759764
GB2_12011	TRI 2046	GRC	Southern Europe	1946----	spring type	300	2.97	5.04	SAMEA118759765
GB2_12012	TRI 2047	GRC	Southern Europe	1946----	spring type	300	1.97	3.33	SAMEA118759766
GB2_12013	TRI 2048	GRC	Southern Europe	1946----	spring type	300	9.38	3.04	SAMEA118759767
GB2_12014	TRI 2052	GRC	Southern Europe	1946----	spring type	300	13.26	3.88	SAMEA118759768
GB2_12015	TRI 2054	GRC	Southern Europe	1946----	spring type	300	11.11	4.21	SAMEA118759769
GB2_12016	TRI 2055	GRC	Southern Europe	1946----	spring type	300	5.69	4.33	SAMEA118759770
GB2_12017	TRI 2056	GRC	Southern Europe	1946----	spring type	300	4.26	1.33	SAMEA118759771
GB2_12018	TRI 2057	GRC	Southern Europe	1946----	spring type	300	4.04	3.04	SAMEA118759772
GB2_12019	TRI 2058	GRC	Southern Europe	1946----	spring type	300	5.26	3.33	SAMEA118759773
GB2_12020	TRI 2064	GRC	Southern Europe	1946----	spring type	300	6.04	2.33	SAMEA118759774
GB2_12021	TRI 2065	GRC	Southern Europe	1946----	spring type	300	17.11	1.76	SAMEA118759775
GB2_12022	TRI 2066	GRC	Southern Europe	1946----	spring type	300	9.94	2.62	SAMEA118759776
GB2_12023	TRI 2068	GRC	Southern Europe	1946----	spring type	300	17.04	1.71	SAMEA118759777
GB2_12024	TRI 2070	GRC	Southern Europe	1946----	spring type	300	9.47	3.04	SAMEA118759778
GB2_12025	TRI 2075	GRC	Southern Europe	1946----	spring type	300	18.61	3.21	SAMEA118759779
GB2_12026	TRI 2077	GRC	Southern Europe	1946----	spring type	300	2.44	3.04	SAMEA118759780
GB2_12027	TRI 2078	GRC	Southern Europe	1946----	spring type	300	4.44	1.04	SAMEA118759781
GB2_12028	TRI 2079	GRC	Southern Europe	1946----	spring type	300	1.28	4.62	SAMEA118759782
GB2_12029	TRI 2080	GRC	Southern Europe	1946----	spring type	300	27.61	7.62	SAMEA118759783
GB2_12030	TRI 2081	GRC	Southern Europe	1946----	spring type	300	9.47	2.25	SAMEA118759784
GB2_12031	TRI 2085	GRC	Southern Europe	1946----	spring type	300	23.18	2.34	SAMEA118759785
GB2_12032	TRI 2093	GRC	Southern Europe	1946----	spring type	300	14.11	1.91	SAMEA118759786
GB2_12033	TRI 2094	GRC	Southern Europe	1946----	spring type	300	4.04	2.2	SAMEA118759787
GB2_12034	TRI 2098	ALB	Southern Europe	1946----	spring type	300	3.75	7.34	SAMEA118759788
GB2_12035	TRI 2099	ALB	Southern Europe	1946----	spring type	300	1.04	6.77	SAMEA118759789
GB2_12036	TRI 2100	ALB	Southern Europe	1946----	spring type	300	8.18	5.05	SAMEA118759790
GB2_12037	TRI 2102	ALB	Southern Europe	1946----	spring type	300	2.94	4.48	SAMEA118759791
GB2_12038	TRI 2103	ALB	Southern Europe	1946----	spring type	300	9.75	4.63	SAMEA118759792
GB2_12039	TRI 2111	ALB	Southern Europe	1946----	spring type	300	14.32	4.05	SAMEA118759793
GB2_12040	TRI 2112	GRC	Southern Europe	1946----	spring type	300	4.89	0.91	SAMEA118759794
GB2_12041	TRI 2117	GRC	Southern Europe	1948----	spring type	300	6.94	0.91	SAMEA118759795
GB2_12042	TRI 2118	GRC	Southern Europe	1948----	spring type	300	20.54	1.63	SAMEA118759796
GB2_12043	TRI 2121	GRC	Southern Europe	1948----	spring type	300	6.11	2.48	SAMEA118759797
GB2_12044	TRI 2123	GRC	Southern Europe	1948----	spring type	300	15.25	3.91	SAMEA118759798
GB2_12045	TRI 2130	GRC	Southern Europe	1946----	spring type	300	4.28	3.77	SAMEA118759799
GB2_12046	TRI 2133	GRC	Southern Europe	1946----	spring type	300	14.11	4.58	SAMEA118759801
GB2_12047	TRI 2134	GRC	Southern Europe	1946----	spring type	300	6.54	1.63	SAMEA118759802
GB2_12048	TRI 2136	GRC	Southern Europe	1946----	spring type	300	-5.61	0.91	SAMEA118759803
GB2_12049	TRI 2138	GRC	Southern Europe	1946----	spring type	300	0.11	3.05	SAMEA118759804
GB2_12050	TRI 2139	GRC	Southern Europe	1946----	spring type	300	0.39	7.44	SAMEA118759805
GB2_12051	TRI 2140	GRC	Southern Europe	1946----	spring type	300	-1.56	5.01	SAMEA118759806
GB2_12052	TRI 2142	GRC	Southern Europe	1946----	spring type	300	6.39	6.3	SAMEA118759807
GB2_12053	TRI 2145	GRC	Southern Europe	1946----	spring type	300	3.39	6.15	SAMEA118759808
GB2_12054	TRI 2146	GRC	Southern Europe	1946----	spring type	300	2.25	1.06	SAMEA118759809
GB2_12055	TRI 2149	GRC	Southern Europe	1946----	spring type	500	2.54	1.73	SAMEA118759810
GB2_12056	TRI 2162	TUR	Western Asia	1946----	spring type	300	20.97	1.73	SAMEA118759811
GB2_12057	TRI 2171	TUR	Western Asia	1946----	spring type	300	2.11	2.01	SAMEA118759812
GB2_12058	TRI 2173	TUR	Western Asia	1946----	spring type	300	13.11	3.39	SAMEA118759813
GB2_12059	TRI 2176	TUR	Western Asia	1946----	spring type	300	3.68	4.3	SAMEA118759814
GB2_12060	TRI 2188	TUR	Western Asia	1946----	spring type	300	15.11	-0.27	SAMEA118759815
GB2_12061	TRI 2189	TUR	Western Asia	1946----	spring type	300	13.25	-0.27	SAMEA118759816
GB2_12062	TRI 2197	TUR	Western Asia	1946----	spring type	300	1.62	2.39	SAMEA118759817
GB2_12063	TRI 2198	TUR	Western Asia	1946----	spring type	300	4.72	0.44	SAMEA118759818
GB2_12064	TRI 2200	TUR	Western Asia	1946----	spring type	300	2.88	3.73	SAMEA118759819
GB2_12065	TRI 2201	TUR	Western Asia	1946----	spring type	300	5.62	3.56	SAMEA118759820
GB2_12066	TRI 2202	TUR	Western Asia	1946----	spring type	300	3.85	6.06	SAMEA118759821
GB2_12067	TRI 2203	TUR	Western Asia	1946----	spring type	300	15.19	3.01	SAMEA118759822
GB2_12068	TRI 2206	TUR	Western Asia	1946----	spring type	300	4.62	1.73	SAMEA118759823
GB2_12069	TRI 2207	TUR	Western Asia	1946----	spring type	300	11.19	2.44	SAMEA118759824
GB2_12070	TRI 2208	TUR	Western Asia	1946----	spring type	300	7.22	-0.85	SAMEA118759825
GB2_12071	TRI 2211	GRC	Southern Europe	1946----	spring type	300	-1.95	0.15	SAMEA118759826
GB2_12072	TRI 2218	NA	NA	1947----	spring type	100	4.05	0.15	SAMEA118759827
GB2_12073	TRI 2221	IND	Southern Asia	1946----	spring type	500	8.62	0.31	SAMEA118759828
GB2_12074	TRI 2222	IND	Southern Asia	1946----	spring type	500	-0.24	0.15	SAMEA118759829
GB2_12075	TRI 2240	DEU	Western Europe	1947----	spring type	500	-1.38	0.43	SAMEA118759830
GB2_12076	TRI 2247	CHN	Eastern Asia	1947----	spring type	300	5.05	1.01	SAMEA118759831
GB2_12077	TRI 2263	ROU	Eastern Europe	1948----	spring type	300	6.62	3.58	SAMEA118759832
GB2_12078	TRI 2264	ROU	Eastern Europe	1948----	spring type	300	4.76	3.29	SAMEA118759833
GB2_12079	TRI 2276	TUR	Western Asia	1946----	spring type	300	23.22	2.65	SAMEA118759834
GB2_12080	TRI 2279	ALB	Southern Europe	1946----	spring type	300	6.19	0.31	SAMEA118759835
GB2_12081	TRI 2281	GRC	Southern Europe	1946----	spring type	300	7.62	0.43	SAMEA118759836
GB2_12082	TRI 2283	GRC	Southern Europe	1946----	spring type	300	5.51	2.43	SAMEA118759837
GB2_12083	TRI 2284	GRC	Southern Europe	1946----	spring type	300	15.89	0.72	SAMEA118759838
GB2_12084	TRI 2285	ALB	Southern Europe	1946----	spring type	300	3.17	-0.85	SAMEA118759839
GB2_12085	TRI 2420	CHN	Eastern Asia	1947----	spring type	300	3.84	7.01	SAMEA118759840
GB2_12086	TRI 2421	CHN	Eastern Asia	1947----	spring type	300	8.17	5.58	SAMEA118759841
GB2_12087	TRI 2424	CHN	Eastern Asia	1947----	spring type	300	11.84	0.72	SAMEA118759842
GB2_12088	TRI 2426	CHN	Eastern Asia	1947----	spring type	300	4.17	3.43	SAMEA118759843
GB2_12089	TRI 2429	CHN	Eastern Asia	1947----	spring type	300	14.03	3.01	SAMEA118759844
GB2_12090	TRI 2430	AFG	Southern Asia	1947----	spring type	300	8.17	3.25	SAMEA118759845
GB2_12091	TRI 2432	CHN	Eastern Asia	1947----	spring type	300	7.75	4.97	SAMEA118759846
GB2_12092	TRI 2433	CHN	Eastern Asia	1947----	spring type	300	14.6	1.97	SAMEA118759800
GB2_12093	TRI 2434	NPL	Southern Asia	1947----	spring type	300	19.03	8.39	SAMEA118759847
GB2_12094	TRI 2435	CHN	Eastern Asia	1947----	spring type	300	3.84	-0.61	SAMEA118759848
GB2_12095	TRI 2437	NPL	Southern Asia	1947----	spring type	300	18.6	4.11	SAMEA118759849
GB2_12097	TRI 2442	NPL	Southern Asia	1947----	spring type	300	8.75	0.54	SAMEA118759851
GB2_12098	TRI 2443	NPL	Southern Asia	1947----	spring type	300	13.67	1.82	SAMEA118759852
GB2_12099	TRI 2446	CHN	Eastern Asia	1947----	spring type	300	4.46	3.54	SAMEA118759853
GB2_12100	TRI 2448	NPL	Southern Asia	1947----	spring type	300	10.51	7.68	SAMEA118759854
GB2_12101	TRI 2450	NPL	Southern Asia	1947----	spring type	300	19.84	3.11	SAMEA118759855
GB2_12102	TRI 2453	NPL	Southern Asia	1947----	spring type	300	5.03	10.42	SAMEA118759856
GB2_12103	TRI 2455	NPL	Southern Asia	1947----	spring type	300	22.76	9.97	SAMEA118759857
GB2_12104	TRI 2460	IND	Southern Asia	1947----	spring type	300	9.43	2.54	SAMEA118759858
GB2_12105	TRI 2461	IND	Southern Asia	1947----	spring type	300	15.83	9.25	SAMEA118759859
GB2_12106	TRI 2462	IND	Southern Asia	1947----	spring type	300	23.43	1.42	SAMEA118759860
GB2_12107	TRI 2465	IND	Southern Asia	1947----	spring type	300	17.55	5.58	SAMEA118759861
GB2_12108	TRI 2466	IND	Southern Asia	1947----	spring type	300	4.83	0.54	SAMEA118759862
GB2_12109	TRI 2467	IND	Southern Asia	1947----	spring type	300	-0.07	5.54	SAMEA118759863
GB2_12110	TRI 2469	IND	Southern Asia	1947----	spring type	300	23.98	7.82	SAMEA118759864
GB2_12111	TRI 2470	IND	Southern Asia	1947----	spring type	300	4.12	-3.33	SAMEA118759865
GB2_12112	TRI 2471	IND	Southern Asia	1947----	spring type	300	15.76	-2.33	SAMEA118759866
GB2_12113	TRI 2472	AFG	Southern Asia	1947----	spring type	300	9.55	-1.38	SAMEA118759867
GB2_12114	TRI 2474	IND	Southern Asia	1947----	spring type	300	6.4	-3.5	SAMEA118759868
GB2_12115	TRI 2475	IND	Southern Asia	1947----	spring type	300	28.93	5.76	SAMEA118759869
GB2_12116	TRI 2479	AFG	Southern Asia	1947----	spring type	300	13.4	5.33	SAMEA118759870
GB2_12117	TRI 2480	IND	Southern Asia	1947----	spring type	300	-0.74	5.76	SAMEA118759871
GB2_12118	TRI 2481	CHN	Eastern Asia	1947----	spring type	300	-0.24	1.48	SAMEA118759872
GB2_12119	TRI 2484	AFG	Southern Asia	1947----	spring type	300	4.76	1.9	SAMEA118759873
GB2_12120	TRI 2486	CHN	Eastern Asia	1947----	spring type	100	4.43	6.05	SAMEA118759874
GB2_12121	TRI 2488	CHN	Eastern Asia	1947----	spring type	300	14.93	3.19	SAMEA118759875
GB2_12122	TRI 2489	AFG	Southern Asia	1947----	spring type	300	-0.88	3	SAMEA118759876
GB2_12123	TRI 2492	CHN	Eastern Asia	1947----	spring type	300	5.92	3.05	SAMEA118759877
GB2_12124	TRI 2493	CHN	Eastern Asia	1947----	spring type	300	11.59	2.48	SAMEA118759878
GB2_12125	TRI 2494	AFG	Southern Asia	1947----	spring type	300	13.16	2.76	SAMEA118759879
GB2_12126	TRI 2495	CHN	Eastern Asia	1947----	spring type	300	3.01	4.76	SAMEA118759880
GB2_12127	TRI 2508	AFG	Southern Asia	1947----	spring type	300	17.73	3.33	SAMEA118759881
GB2_12129	TRI 2511	CHN	Eastern Asia	1947----	spring type	300	1.92	-1.1	SAMEA118759882
GB2_12130	TRI 2512	CHN	Eastern Asia	1947----	spring type	300	3.44	-0.87	SAMEA118759883
GB2_12131	TRI 2513	CHN	Eastern Asia	1947----	spring type	300	8.59	-0.38	SAMEA118759884
GB2_12132	TRI 2515	CHN	Eastern Asia	1947----	spring type	300	1.73	0.58	SAMEA118759885
GB2_12133	TRI 2517	CHN	Eastern Asia	1947----	spring type	300	4.16	1.72	SAMEA118759886
GB2_12134	TRI 2518	CHN	Eastern Asia	1947----	spring type	300	2.87	1.7	SAMEA118759887
GB2_12135	TRI 2530	CHN	Eastern Asia	1947----	spring type	300	9.3	3.06	SAMEA118759888
GB2_12136	TRI 2532	AFG	Southern Asia	1947----	spring type	300	10.3	-1.14	SAMEA118759889
GB2_12137	TRI 2534	AFG	Southern Asia	1947----	spring type	300	6.44	0.72	SAMEA118759890
GB2_12138	TRI 2536	NPL	Southern Asia	1947----	spring type	300	17.59	0.53	SAMEA118759891
GB2_12139	TRI 2537	CHN	Eastern Asia	1947----	spring type	300	5.92	5.03	SAMEA118759893
GB2_12140	TRI 2538	CHN	Eastern Asia	1947----	spring type	300	6.75	4.44	SAMEA118759894
GB2_12141	TRI 2541	NPL	Southern Asia	1947----	spring type	300	4.59	1.86	SAMEA118759895
GB2_12142	TRI 2546	CHN	Eastern Asia	1947----	spring type	300	2.73	2.72	SAMEA118759896
GB2_12143	TRI 2547	AFG	Southern Asia	1947----	spring type	300	13.09	9.01	SAMEA118759897
GB2_12144	TRI 2550	CHN	Eastern Asia	1947----	spring type	300	4.13	7.86	SAMEA118759898
GB2_12145	TRI 2551	CHN	Eastern Asia	1947----	spring type	300	-3.92	1.29	SAMEA118759899
GB2_12146	TRI 2555	CHN	Eastern Asia	1947----	spring type	300	-2.25	8.7	SAMEA118759900
GB2_12147	TRI 2558	CHN	Eastern Asia	1947----	spring type	300	-0.16	2.58	SAMEA118759901
GB2_12148	TRI 2776	NPL	Southern Asia	1947----	spring type	300	23.41	5.15	SAMEA118759902
GB2_12149	TRI 2561	CHN	Eastern Asia	1947----	spring type	300	-2.92	-0.99	SAMEA118759903
GB2_12151	TRI 2564	AFG	Southern Asia	1947----	spring type	300	-2.75	2.72	SAMEA118759904
GB2_12152	TRI 2565	IND	Southern Asia	1947----	spring type	300	22.75	3.44	SAMEA118759905
GB2_12153	TRI 2569	CHN	Eastern Asia	1947----	spring type	300	-0.44	1.96	SAMEA118759906
GB2_12154	TRI 2570	CHN	Eastern Asia	1947----	spring type	300	3.27	3.05	SAMEA118759907
GB2_12155	TRI 2571	CHN	Eastern Asia	1947----	spring type	300	14.84	2.39	SAMEA118759908
GB2_12156	TRI 2572	CHN	Eastern Asia	1947----	spring type	300	0.08	2.96	SAMEA118759909
GB2_12157	TRI 2574	IND	Southern Asia	1947----	spring type	300	6.56	3.39	SAMEA118759910
GB2_12158	TRI 2576	IND	Southern Asia	1947----	spring type	300	0.16	15.39	SAMEA118759911
GB2_12159	TRI 2577	CHN	Eastern Asia	1947----	spring type	300	0.13	10.1	SAMEA118759912
GB2_12160	TRI 2578	AFG	Southern Asia	1947----	spring type	300	10.13	4.72	NA
GB2_12161	TRI 2579	AFG	Southern Asia	1947----	spring type	300	-1.25	5.82	SAMEA118759913
GB2_12163	TRI 2583	CHN	Eastern Asia	1947----	spring type	300	7.84	4.39	SAMEA118759914
GB2_12164	TRI 2585	AFG	Southern Asia	1947----	spring type	300	16.27	3.67	SAMEA118759915
GB2_12165	TRI 2592	IND	Southern Asia	1947----	spring type	300	0.25	-3.61	SAMEA118759916
GB2_12166	TRI 2593	CHN	Eastern Asia	1947----	spring type	300	15.53	3.1	SAMEA118759917
GB2_12167	TRI 2596	IND	Southern Asia	1947----	spring type	300	13.24	3.82	SAMEA118759918
GB2_12168	TRI 2597	CHN	Eastern Asia	1947----	spring type	300	11.38	3.24	SAMEA118759919
GB2_12169	TRI 2599	NPL	Southern Asia	1947----	spring type	300	15.53	5.53	SAMEA118759920
GB2_12170	TRI 2600	CHN	Eastern Asia	1947----	spring type	300	5.86	1.67	SAMEA118759921
GB2_12171	TRI 2603	AFG	Southern Asia	1947----	spring type	300	5.95	7.39	SAMEA118759922
GB2_12172	TRI 2605	CHN	Eastern Asia	1947----	spring type	300	5.53	5.53	SAMEA118759923
GB2_12173	TRI 2606	CHN	Eastern Asia	1947----	spring type	300	10.03	11.1	SAMEA118759924
GB2_12174	TRI 2614	AFG	Southern Asia	1947----	spring type	300	16.24	4.03	SAMEA118759925
GB2_12175	TRI 2611	NPL	Southern Asia	1947----	spring type	300	38.36	8.46	SAMEA118759926
GB2_12176	TRI 2610	CHN	Eastern Asia	1947----	spring type	300	4.95	5.89	SAMEA118759927
GB2_12177	TRI 2608	CHN	Eastern Asia	1947----	spring type	300	6.53	3.03	SAMEA118759928
GB2_12178	TRI 2616	NPL	Southern Asia	1947----	spring type	300	15.81	8.63	SAMEA118759929
GB2_12179	TRI 2618	AFG	Southern Asia	1947----	spring type	300	12.03	6.74	SAMEA118759930
GB2_12180	TRI 2619	NPL	Southern Asia	1947----	spring type	300	28.86	14.03	SAMEA118759931
GB2_12181	TRI 2628	AFG	Southern Asia	1947----	spring type	300	5.67	9.79	SAMEA118759932
GB2_12182	TRI 2629	CHN	Eastern Asia	1947----	spring type	300	5.93	6.96	SAMEA118759933
GB2_12183	TRI 2631	CHN	Eastern Asia	1947----	spring type	300	0.73	9.03	SAMEA118759934
GB2_12184	TRI 2633	IND	Southern Asia	1947----	spring type	300	25.38	17.46	SAMEA118759935
GB2_12185	TRI 2638	AFG	Southern Asia	1947----	spring type	300	6.95	4.74	SAMEA118759936
GB2_12186	TRI 2641	AFG	Southern Asia	1947----	spring type	300	9.44	8.17	SAMEA118759892
GB2_12187	TRI 2642	AFG	Southern Asia	1947----	spring type	300	7.87	13.03	SAMEA118759937
GB2_12188	TRI 2644	IND	Southern Asia	1947----	spring type	300	12.44	2.17	SAMEA118759938
GB2_12189	TRI 2645	AFG	Southern Asia	1947----	spring type	300	2.47	2.46	SAMEA118759939
GB2_12190	TRI 2648	AFG	Southern Asia	1947----	spring type	300	11.73	1.89	SAMEA118759940
GB2_12191	TRI 2649	CHN	Eastern Asia	1947----	spring type	300	15.16	2.96	SAMEA118759941
GB2_12192	TRI 2653	AFG	Southern Asia	1947----	spring type	300	3.8	4.71	SAMEA118759942
GB2_12193	TRI 2655	IND	Southern Asia	1947----	spring type	300	17.73	3.96	SAMEA118759943
GB2_12194	TRI 2657	AFG	Southern Asia	1947----	spring type	300	17.44	7.25	SAMEA118759944
GB2_12195	TRI 2658	AFG	Southern Asia	1947----	spring type	300	12.3	9.7	SAMEA118759945
GB2_12196	TRI 2659	AFG	Southern Asia	1947----	spring type	300	21.87	7.87	SAMEA118759946
GB2_12197	TRI 2660	AFG	Southern Asia	1947----	spring type	300	24.87	6.73	SAMEA118759947
GB2_12198	TRI 2662	CHN	Eastern Asia	1947----	spring type	300	8.8	7.2	SAMEA118759948
GB2_12199	TRI 2664	AFG	Southern Asia	1947----	spring type	300	16.3	2.25	SAMEA118759949
GB2_12200	TRI 2666	AFG	Southern Asia	1947----	spring type	300	17.01	3.7	SAMEA118759950
GB2_12201	TRI 2668	CHN	Eastern Asia	1947----	spring type	300	7.3	4.53	SAMEA118759951
GB2_12202	TRI 2669	AFG	Southern Asia	1947----	spring type	300	9.13	5.87	SAMEA118759952
GB2_12203	TRI 2670	IND	Southern Asia	1947----	spring type	300	8.01	4.53	SAMEA118759953
GB2_12204	TRI 2673	CHN	Eastern Asia	1947----	spring type	300	5.73	6.96	SAMEA118759954
GB2_12205	TRI 2674	NPL	Southern Asia	1947----	spring type	300	9.87	5.68	SAMEA118759955
GB2_12206	TRI 2678	AFG	Southern Asia	1947----	spring type	300	5.51	5.87	SAMEA118759956
GB2_12207	TRI 2682	IND	Southern Asia	1947----	spring type	300	20.21	11.82	SAMEA118759957
GB2_12208	TRI 2683	IND	Southern Asia	1947----	spring type	300	12.78	2.87	SAMEA118759958
GB2_12209	TRI 2687	CHN	Eastern Asia	1947----	spring type	300	5.31	3.53	SAMEA118759959
GB2_12210	TRI 2691	CHN	Eastern Asia	1947----	spring type	300	5.14	1.11	SAMEA118759960
GB2_12211	TRI 2695	CHN	Eastern Asia	1947----	spring type	300	5.31	4.11	SAMEA118759961
GB2_12212	TRI 2700	CHN	Eastern Asia	1947----	spring type	300	10.07	3.25	SAMEA118759962
GB2_12213	TRI 2702	CHN	Eastern Asia	1947----	spring type	300	12.64	1.87	SAMEA118759963
GB2_12214	TRI 2703	CHN	Eastern Asia	1947----	spring type	300	5.31	2.98	SAMEA118759964
GB2_12215	TRI 2704	CHN	Eastern Asia	1947----	spring type	300	4.64	2.55	SAMEA118759965
GB2_12216	TRI 2707	CHN	Eastern Asia	1947----	spring type	300	5.38	2.27	SAMEA118759966
GB2_12217	TRI 2710	CHN	Eastern Asia	1947----	spring type	300	3.72	2.84	SAMEA118759967
GB2_12218	TRI 2714	IND	Southern Asia	1947----	spring type	300	4.05	2.55	SAMEA118759968
GB2_12219	TRI 2715	NPL	Southern Asia	1947----	spring type	300	4.05	6.27	SAMEA118759969
GB2_12220	TRI 2716	IND	Southern Asia	1947----	spring type	300	3.38	4.55	SAMEA118759970
GB2_12221	TRI 2717	IND	Southern Asia	1947----	spring type	300	3.38	7.12	SAMEA118759971
GB2_12222	TRI 2724	GRC	Southern Europe	1946----	spring type	300	17.1	8.27	SAMEA118759972
GB2_12223	TRI 2725	GRC	Southern Europe	1946----	spring type	300	4.88	8.84	SAMEA118759973
GB2_12224	TRI 2727	NPL	Southern Asia	1947----	spring type	300	15.1	7.12	SAMEA118759974
GB2_12225	TRI 2730	IND	Southern Asia	1947----	spring type	300	3.38	6.22	SAMEA118759975
GB2_12226	TRI 2731	IND	Southern Asia	1947----	spring type	300	9.24	6.12	SAMEA118759976
GB2_12227	TRI 2732	CHN	Eastern Asia	1947----	spring type	300	5.81	3.12	SAMEA118759977
GB2_12228	TRI 2733	NPL	Southern Asia	1947----	spring type	300	8.81	9.12	SAMEA118759978
GB2_12229	TRI 2734	AFG	Southern Asia	1947----	spring type	300	11.38	4.05	SAMEA118759979
GB2_12230	TRI 2736	IND	Southern Asia	1947----	spring type	300	8.24	5.12	SAMEA118759980
GB2_12231	TRI 2738	IND	Southern Asia	1947----	spring type	300	19.38	3.98	SAMEA118759981
GB2_12232	TRI 2739	IND	Southern Asia	1947----	spring type	300	24.1	4.39	SAMEA118759983
GB2_12233	TRI 2743	CHN	Eastern Asia	1947----	spring type	300	3.38	4.84	SAMEA118759984
GB2_12234	TRI 2744	IND	Southern Asia	1947----	spring type	300	17.24	7.53	SAMEA118759985
GB2_12235	TRI 2745	AFG	Southern Asia	1947----	spring type	300	6.1	7.64	SAMEA118759986
GB2_12236	TRI 2746	CHN	Eastern Asia	1947----	spring type	300	-1.54	5.53	SAMEA118759987
GB2_12237	TRI 2747	CHN	Eastern Asia	1947----	spring type	300	0.32	6.67	SAMEA118759988
GB2_12238	TRI 2748	NPL	Southern Asia	1947----	spring type	300	-1.97	3.41	SAMEA118759989
GB2_12239	TRI 2751	IND	Southern Asia	1947----	spring type	300	12.63	4.1	SAMEA118759990
GB2_12240	TRI 2752	IND	Southern Asia	1947----	spring type	300	1.46	0.96	SAMEA118759991
GB2_12241	TRI 2753	IND	Southern Asia	1947----	spring type	300	3.75	5.1	SAMEA118759992
GB2_12242	TRI 2756	CHN	Eastern Asia	1947----	spring type	300	5.89	4.38	SAMEA118759993
GB2_12243	TRI 2757	CHN	Eastern Asia	1947----	spring type	300	-1.39	5.1	SAMEA118759994
GB2_12244	TRI 2758	NPL	Southern Asia	1947----	spring type	300	6.61	5.38	SAMEA118759995
GB2_12246	TRI 2765	NPL	Southern Asia	1947----	spring type	300	15.07	7.84	SAMEA118759997
GB2_12247	TRI 2766	AFG	Southern Asia	1947----	spring type	300	0.21	6.96	SAMEA118759998
GB2_12248	TRI 2768	IND	Southern Asia	1947----	spring type	300	8.5	7.1	SAMEA118759999
GB2_12249	TRI 2769	CHN	Eastern Asia	1947----	spring type	300	15.78	5.81	SAMEA118760000
GB2_12250	TRI 2771	AFG	Southern Asia	1947----	spring type	300	-3.93	3.96	SAMEA118760001
GB2_12251	TRI 2773	CHN	Eastern Asia	1947----	spring type	300	1.93	4.1	SAMEA118760002
GB2_12252	TRI 2774	NPL	Southern Asia	1947----	spring type	300	5.5	4.53	SAMEA118760003
GB2_12253	TRI 2777	IND	Southern Asia	1947----	spring type	300	10.64	6.24	SAMEA118760004
GB2_12254	TRI 2780	CHN	Eastern Asia	1947----	spring type	300	1.47	2.25	SAMEA118760005
GB2_12255	TRI 2781	AFG	Southern Asia	1947----	spring type	300	7.74	1.67	SAMEA118760006
GB2_12256	TRI 2782	IND	Southern Asia	1947----	spring type	300	-3.93	1.53	SAMEA118760007
GB2_12257	TRI 2783	AFG	Southern Asia	1947----	spring type	300	-3.64	1.25	SAMEA118760008
GB2_12258	TRI 2784	IND	Southern Asia	1947----	spring type	300	-3.43	2.96	SAMEA118760009
GB2_12259	TRI 2785	IND	Southern Asia	1947----	spring type	300	-3.93	2.53	SAMEA118760010
GB2_12260	TRI 2786	IND	Southern Asia	1947----	spring type	300	16.36	2.45	SAMEA118760011
GB2_12261	TRI 2788	CHN	Eastern Asia	1947----	spring type	300	10.67	2.82	SAMEA118760012
GB2_12262	TRI 2789	CHN	Eastern Asia	1947----	spring type	300	13.64	4.25	SAMEA118760013
GB2_12263	TRI 2792	AFG	Southern Asia	1947----	spring type	300	29.93	5.25	SAMEA118760014
GB2_12264	TRI 2793	AFG	Southern Asia	1947----	spring type	300	11.07	5.65	SAMEA118760015
GB2_12265	TRI 2794	AFG	Southern Asia	1947----	spring type	300	17.5	3.67	SAMEA118760016
GB2_12266	TRI 2795	CHN	Eastern Asia	1947----	spring type	300	24.57	3.96	SAMEA118760017
GB2_12267	TRI 2796	IND	Southern Asia	1947----	spring type	300	29.57	4.53	SAMEA118760018
GB2_12268	TRI 2800	IND	Southern Asia	1947----	spring type	300	5	4.58	SAMEA118760019
GB2_12269	TRI 2802	CHN	Eastern Asia	1947----	spring type	300	38.71	3.39	SAMEA118760020
GB2_12270	TRI 2804	IND	Southern Asia	1947----	spring type	300	21.28	5.12	SAMEA118760021
GB2_12271	TRI 2805	AFG	Southern Asia	1947----	spring type	300	9.14	1.91	SAMEA118760022
GB2_12272	TRI 2810	AFG	Southern Asia	1947----	spring type	300	20.14	3.45	SAMEA118760023
GB2_12273	TRI 2815	AFG	Southern Asia	1947----	spring type	300	41.5	3.67	SAMEA118760024
GB2_12274	TRI 2817	AFG	Southern Asia	1947----	spring type	300	17.14	0.67	SAMEA118760025
GB2_12275	TRI 2818	AFG	Southern Asia	1947----	spring type	300	42.16	0.95	SAMEA118760026
GB2_12276	TRI 2822	AFG	Southern Asia	1947----	spring type	300	7.09	0.95	SAMEA118760027
GB2_12277	TRI 2825	CHN	Eastern Asia	1947----	spring type	300	3.59	-0.33	SAMEA118760028
GB2_12278	TRI 2826	CHN	Eastern Asia	1947----	spring type	300	14.24	2.24	SAMEA118760029
GB2_12279	TRI 2827	IND	Southern Asia	1947----	spring type	300	21.81	1.52	SAMEA118760030
GB2_12280	TRI 2828	IND	Southern Asia	1947----	spring type	300	3.09	2	SAMEA118759982
GB2_12281	TRI 2829	CHN	Eastern Asia	1947----	spring type	300	11.52	6.33	SAMEA118760031
GB2_12282	TRI 2830	CHN	Eastern Asia	1947----	spring type	300	3.43	4.38	SAMEA118760032
GB2_12283	TRI 2831	AFG	Southern Asia	1947----	spring type	300	11.38	3	SAMEA118760033
GB2_12284	TRI 2832	NPL	Southern Asia	1947----	spring type	300	15.95	4.95	SAMEA118760034
GB2_12285	TRI 2833	NPL	Southern Asia	1947----	spring type	300	14.24	5.17	SAMEA118760035
GB2_12286	TRI 2836	CHN	Eastern Asia	1947----	spring type	300	9.09	5.67	SAMEA118760036
GB2_12287	TRI 2842	IND	Southern Asia	1947----	spring type	300	12.95	4.52	SAMEA118760037
GB2_12288	TRI 2843	AFG	Southern Asia	1947----	spring type	300	4.26	12.52	SAMEA118760038
GB2_12289	TRI 2844	CHN	Eastern Asia	1947----	spring type	300	7.09	-0.33	SAMEA118760039
GB2_12290	TRI 2846	AFG	Southern Asia	1947----	spring type	300	10.09	6.95	SAMEA118760040
GB2_12291	TRI 2849	URY	South America	1949----	spring type	500	3.09	11.38	SAMEA118760041
GB2_12292	TRI 2851	AFG	Southern Asia	1947----	spring type	300	4.09	10.1	SAMEA118760042
GB2_12293	TRI 2855	CHN	Eastern Asia	1947----	spring type	300	3.09	3.95	SAMEA118760043
GB2_12294	TRI 2856	NPL	Southern Asia	1947----	spring type	300	13.09	4.1	SAMEA118760044
GB2_12295	TRI 2857	NPL	Southern Asia	1947----	spring type	300	12.76	6.82	SAMEA118760045
GB2_12296	TRI 2858	AFG	Southern Asia	1947----	spring type	300	8.55	2.39	SAMEA118760046
GB2_12297	TRI 2859	AFG	Southern Asia	1947----	spring type	300	7.05	8.06	SAMEA118760047
GB2_12298	TRI 2863	CHN	Eastern Asia	1947----	spring type	300	6.31	4.06	SAMEA118760048
GB2_12299	TRI 2864	IND	Southern Asia	1947----	spring type	300	12.6	9.1	SAMEA118760049
GB2_12300	TRI 2865	CHN	Eastern Asia	1947----	spring type	300	6.02	9.82	SAMEA118760050
GB2_12301	TRI 2866	AFG	Southern Asia	1947----	spring type	300	37.74	-0.18	SAMEA118760051
GB2_12302	TRI 2867	AFG	Southern Asia	1947----	spring type	300	5.17	0.53	SAMEA118760052
GB2_12303	TRI 2868	IND	Southern Asia	1947----	spring type	300	6.88	3.72	SAMEA118760053
GB2_12304	TRI 2869	CHN	Eastern Asia	1947----	spring type	300	5.45	2.25	SAMEA118760054
GB2_12305	TRI 2870	CHN	Eastern Asia	1947----	spring type	300	8.6	4.25	SAMEA118760055
GB2_12306	TRI 2872	USA	Northern America	1949----	spring type	500	17.37	2.67	SAMEA118760056
GB2_12307	TRI 2873	PRT	Southern Europe	1949----	spring type	100	1.94	1.53	SAMEA118760057
GB2_12308	TRI 2879	CHN	Eastern Asia	1947----	spring type	300	5.51	6.67	SAMEA118760058
GB2_12309	TRI 2886	CHN	Eastern Asia	1947----	spring type	300	1.94	4.67	SAMEA118760059
GB2_12310	TRI 2887	PRT	Southern Europe	1949----	spring type	500	2.23	2.53	SAMEA118760060
GB2_12311	TRI 2890	FRA	Western Europe	1949----	spring type	500	2.27	2.82	SAMEA118760061
GB2_12312	TRI 2891	IND	Southern Asia	1947----	spring type	300	13.08	5.96	SAMEA118760062
GB2_12313	TRI 2892	IND	Southern Asia	1947----	spring type	300	29.61	2.67	SAMEA118760063
GB2_12314	TRI 2896	GRC	Southern Europe	1946----	spring type	300	1.94	4.74	SAMEA118760064
GB2_12315	TRI 2898	IND	Southern Asia	1947----	spring type	300	1.94	6.59	SAMEA118760065
GB2_12316	TRI 2899	AFG	Southern Asia	1947----	spring type	300	12.37	7.31	SAMEA118760066
GB2_12317	TRI 2904	IND	Southern Asia	1947----	spring type	300	16.37	5.74	SAMEA118760067
GB2_12318	TRI 2905	IND	Southern Asia	1947----	spring type	300	5.74	-1.41	SAMEA118760068
GB2_12319	TRI 2906	CHN	Eastern Asia	1947----	spring type	300	10.27	2.79	SAMEA118760069
GB2_12320	TRI 2910	CHN	Eastern Asia	1947----	spring type	300	5.34	3.45	SAMEA118760070
GB2_12321	TRI 2912	AFG	Southern Asia	1947----	spring type	300	6.8	5.17	SAMEA118760071
GB2_12323	TRI 2914	NPL	Southern Asia	1947----	spring type	300	10.66	7.88	SAMEA118760072
GB2_12324	TRI 2915	NPL	Southern Asia	1947----	spring type	300	22.66	4.59	SAMEA118760073
GB2_12325	TRI 2917	AFG	Southern Asia	1947----	spring type	300	7.94	3.88	SAMEA118760075
GB2_12326	TRI 2918	CHN	Eastern Asia	1947----	spring type	300	10.8	4.88	SAMEA118760076
GB2_12327	TRI 2920	AFG	Southern Asia	1947----	spring type	300	-1.59	2.88	SAMEA118760077
GB2_12328	TRI 2921	NPL	Southern Asia	1947----	spring type	300	-3.42	7.31	SAMEA118760078
GB2_12329	TRI 2924	CHN	Eastern Asia	1947----	spring type	300	5.29	8.74	SAMEA118760079
GB2_12330	TRI 2926	AFG	Southern Asia	1947----	spring type	300	-3.42	3.74	SAMEA118760080
GB2_12331	TRI 2927	AFG	Southern Asia	1947----	spring type	300	30.43	9.09	SAMEA118760081
GB2_12332	TRI 2937	ITA	Southern Europe	1949----	spring type	500	2.86	1.76	SAMEA118760082
GB2_12333	TRI 2943	PRT	Southern Europe	1949----	spring type	500	7	5.17	SAMEA118760083
GB2_12334	TRI 2944	PRT	Southern Europe	1949----	spring type	500	5.43	0.79	SAMEA118760084
GB2_12375	TRI 3076	PRT	Southern Europe	1949----	spring type	500	5.16	-0.8	SAMEA118760124
GB2_12376	TRI 3078	PRT	Southern Europe	1949----	spring type	500	-5.41	9.77	SAMEA118760125
GB2_12377	TRI 3079	PRT	Southern Europe	1949----	spring type	300	12.87	3.05	SAMEA118760126
GB2_12378	TRI 3080	PRT	Southern Europe	1949----	spring type	500	-4.74	2.91	SAMEA118760127
GB2_12379	TRI 3082	PRT	Southern Europe	1949----	spring type	500	3.3	3.91	SAMEA118760128
GB2_12380	TRI 3085	PRT	Southern Europe	1949----	spring type	500	-3.24	3.48	SAMEA118760129
GB2_12381	TRI 3088	FRA	Western Europe	1949----	spring type	500	-4.41	3.63	SAMEA118760130
GB2_12382	TRI 3090	PRT	Southern Europe	1949----	spring type	100	-5.41	1.34	SAMEA118760131
GB2_12383	TRI 3091	PRT	Southern Europe	1949----	spring type	500	-0.91	3.34	SAMEA118760132
GB2_12384	TRI 3093	PRT	Southern Europe	1949----	spring type	500	24.59	-0.09	SAMEA118760133
GB2_12385	TRI 3094	PRT	Southern Europe	1949----	spring type	500	2.02	0.34	SAMEA118760134
GB2_12386	TRI 3096	USA	Northern America	1949----	spring type	500	-0.74	0.91	SAMEA118760135
GB2_12387	TRI 3098	PRT	Southern Europe	1949----	spring type	500	20.73	-1.35	SAMEA118760136
GB2_12388	TRI 3101	PRT	Southern Europe	1949----	spring type	500	16.3	0.15	SAMEA118760137
GB2_12389	TRI 3106	PRT	Southern Europe	1949----	spring type	500	12.24	-1.52	SAMEA118760138
GB2_12390	TRI 3107	ITA	Southern Europe	1949----	spring type	500	-0.05	3.34	SAMEA118760139
GB2_12391	TRI 3109	USA	Northern America	1949----	spring type	500	-0.24	0.48	SAMEA118760140
GB2_12392	TRI 3110	PRT	Southern Europe	1949----	spring type	100	11.53	3.65	SAMEA118760141
GB2_12393	TRI 3113	PRT	Southern Europe	1949----	spring type	500	6.24	0.65	SAMEA118760142
GB2_12394	TRI 3119	PRT	Southern Europe	1949----	spring type	300	4.53	6.77	SAMEA118760143
GB2_12395	TRI 3120	USA	Northern America	1949----	spring type	500	7.3	0.14	SAMEA118760144
GB2_12396	TRI 3124	PRT	Southern Europe	1949----	spring type	500	10.67	7.85	SAMEA118760145
GB2_12397	TRI 3131	ITA	Southern Europe	1949----	spring type	500	10.24	4.57	SAMEA118760146
GB2_12398	TRI 3133	PRT	Southern Europe	1949----	spring type	100	15.1	2.57	SAMEA118760147
GB2_12399	TRI 3134	PRT	Southern Europe	1949----	spring type	500	3.24	3.57	SAMEA118760148
GB2_12400	TRI 3135	PRT	Southern Europe	1949----	spring type	300	22.38	8.57	SAMEA118760149
GB2_12401	TRI 3141	PRT	Southern Europe	1949----	spring type	100	-0.74	7.57	SAMEA118760150
GB2_12402	TRI 3143	CHN	Eastern Asia	1947----	spring type	300	20.1	2.14	SAMEA118760151
GB2_12403	TRI 3147	PRT	Southern Europe	1949----	spring type	500	20.53	5.64	SAMEA118760152
GB2_12404	TRI 3152	URY	South America	1949----	spring type	500	13.95	1.28	SAMEA118760153
GB2_12405	TRI 3153	PRT	Southern Europe	1949----	spring type	500	15.81	9.71	SAMEA118760154
GB2_12406	TRI 3154	PRT	Southern Europe	1949----	spring type	500	8.24	2.47	SAMEA118760155
GB2_12407	TRI 3158	PRT	Southern Europe	1949----	spring type	500	-0.9	5.85	SAMEA118760156
GB2_12408	TRI 3159	PRT	Southern Europe	1949----	spring type	100	7.24	7.14	SAMEA118760157
GB2_12409	TRI 3160	PRT	Southern Europe	1949----	spring type	500	25.77	7.57	SAMEA118760158
GB2_12410	TRI 3161	PRT	Southern Europe	1949----	spring type	500	16.91	3	SAMEA118760159
GB2_12411	TRI 3162	ITA	Southern Europe	1949----	spring type	500	1.44	2.57	SAMEA118760160
GB2_12412	TRI 3164	GBR	Northern Europe	1949----	spring type	500	10.97	4.97	SAMEA118760161
GB2_12413	TRI 3165	PRT	Southern Europe	1949----	spring type	500	9.06	7.64	SAMEA118760162
GB2_12414	TRI 3172	PRT	Southern Europe	1949----	spring type	500	2.63	3.57	SAMEA118760163
GB2_12415	TRI 3178	PRT	Southern Europe	1949----	spring type	500	14.2	7.92	SAMEA118760164
GB2_12416	TRI 3182	PRT	Southern Europe	1949----	spring type	500	6.2	6.06	SAMEA118760165
GB2_12417	TRI 3184	URY	South America	1949----	spring type	500	2.2	3.37	SAMEA118760166
GB2_12419	TRI 3188	PRT	Southern Europe	1949----	spring type	500	3.91	5.77	SAMEA118760168
GB2_12420	TRI 3189	CAN	Northern America	1949----	spring type	100	19.34	6.2	SAMEA118760169
GB2_12421	TRI 3191	IND	Southern Asia	1947----	spring type	300	14.44	5.6	SAMEA118760170
GB2_12422	TRI 3193	URY	South America	1949----	spring type	500	2.77	5.49	SAMEA118760171
GB2_12423	TRI 3194	CHN	Eastern Asia	1947----	spring type	300	17.06	8.06	SAMEA118760172
GB2_12424	TRI 3196	CHN	Eastern Asia	1947----	spring type	300	7.34	6.49	SAMEA118760173
GB2_12425	TRI 3197	IND	Southern Asia	1947----	spring type	300	34.27	6.49	SAMEA118760174
GB2_12426	TRI 3198	CHN	Eastern Asia	1947----	spring type	300	31.34	7.35	SAMEA118760175
GB2_12427	TRI 3204	CHN	Eastern Asia	1947----	spring type	300	15.77	3.49	SAMEA118760176
GB2_12428	TRI 3206	AFG	Southern Asia	1947----	spring type	300	30.63	5.2	SAMEA118760177
GB2_12429	TRI 3210	NPL	Southern Asia	1947----	spring type	300	25.49	8.92	SAMEA118760178
GB2_12430	TRI 3212	NPL	Southern Asia	1947----	spring type	300	8.64	10.54	SAMEA118760179
GB2_12431	TRI 3220	NPL	Southern Asia	1947----	spring type	300	10.64	8.92	SAMEA118760180
GB2_12432	TRI 3221	NPL	Southern Asia	1947----	spring type	300	10.67	9.87	SAMEA118760181
GB2_12433	TRI 3224	NPL	Southern Asia	1947----	spring type	300	11.81	7.77	SAMEA118760182
GB2_12434	TRI 3226	PRT	Southern Europe	1949----	spring type	500	10.48	-0.8	SAMEA118760183
GB2_12435	TRI 3232	NPL	Southern Asia	1947----	spring type	300	24.1	7.35	SAMEA118760184
GB2_12436	TRI 3242	USA	Northern America	1949----	spring type	500	14.67	4.24	SAMEA118760185
GB2_12437	TRI 3244	PRT	Southern Europe	1949----	spring type	500	10.38	2.95	SAMEA118760186
GB2_12438	TRI 3252	NPL	Southern Asia	1947----	spring type	300	8.67	4.69	SAMEA118760187
GB2_12439	TRI 3254	NPL	Southern Asia	1947----	spring type	300	15.52	4.38	SAMEA118760188
GB2_12440	TRI 3255	NPL	Southern Asia	1947----	spring type	300	26.67	4.95	SAMEA118760189
GB2_12441	TRI 3256	DEU	Western Europe	1950----	spring type	500	9.41	5.86	SAMEA118760190
GB2_12442	TRI 3257	DEU	Western Europe	1950----	spring type	500	6.81	7.67	SAMEA118760191
GB2_12443	TRI 3263	PRT	Southern Europe	1949----	spring type	500	12.1	3.38	SAMEA118760192
GB2_12444	TRI 3266	CHN	Eastern Asia	1947----	spring type	300	7.31	2.24	SAMEA118760193
GB2_12445	TRI 3269	CHN	Eastern Asia	1947----	spring type	300	9.31	3.24	SAMEA118760194
GB2_12446	TRI 3270	CHN	Eastern Asia	1947----	spring type	300	9.24	0.52	SAMEA118760195
GB2_12447	TRI 3271	CHN	Eastern Asia	1947----	spring type	300	10.52	3.09	SAMEA118760196
GB2_12448	TRI 3275	AFG	Southern Asia	1947----	spring type	300	22.52	4.95	SAMEA118760197
GB2_12449	TRI 3278	AFG	Southern Asia	1947----	spring type	300	9.67	2.38	SAMEA118760198
GB2_12450	TRI 3280	CHN	Eastern Asia	1947----	spring type	300	7.88	3.52	SAMEA118760199
GB2_12451	TRI 3281	CHN	Eastern Asia	1947----	spring type	300	7.85	3.24	SAMEA118760200
GB2_12452	TRI 3283	AFG	Southern Asia	1947----	spring type	300	8.88	2.09	SAMEA118760201
GB2_12454	TRI 3285	CHN	Eastern Asia	1947----	spring type	300	19.73	11.02	SAMEA118760202
GB2_12455	TRI 3293	DEU	Western Europe	1950----	spring type	500	7.45	7.09	SAMEA118760203
GB2_12456	TRI 3295	CHN	Eastern Asia	1947----	spring type	300	7.62	5.32	SAMEA118760204
GB2_12457	TRI 3296	CHN	Eastern Asia	1947----	spring type	300	7.45	3.44	SAMEA118760205
GB2_12458	TRI 3297	AFG	Southern Asia	1947----	spring type	300	9.28	3.77	SAMEA118760206
GB2_12459	TRI 3298	AFG	Southern Asia	1947----	spring type	300	12.59	3.48	SAMEA118760207
GB2_12460	TRI 3312	IND	Southern Asia	1947----	spring type	300	9.95	3.77	SAMEA118760208
GB2_12461	TRI 3305	CHN	Eastern Asia	1947----	spring type	300	10.88	3.77	SAMEA118760209
GB2_12462	TRI 3304	IND	Southern Asia	1949----	spring type	500	10.28	4.05	SAMEA118760210
GB2_12463	TRI 3895	FRA	Western Europe	1949----	spring type	500	21.73	3.77	SAMEA118760211
GB2_12464	TRI 3893	ITA	Southern Europe	1949----	spring type	500	16.02	5.34	SAMEA118760212
GB2_12465	TRI 3315	TUR	Western Asia	1946----	spring type	300	7.45	5.63	SAMEA118760213
GB2_12466	TRI 3316	CHN	Eastern Asia	1947----	spring type	300	14.28	5.1	SAMEA118760214
GB2_12467	TRI 3317	IND	Southern Asia	1947----	spring type	300	10.45	5.77	SAMEA118760215
GB2_12468	TRI 3318	CHN	Eastern Asia	1947----	spring type	300	7.45	3.77	SAMEA118760167
GB2_12469	TRI 3319	PRT	Southern Europe	1949----	spring type	500	9.78	4.77	SAMEA118760216
GB2_12470	TRI 3391	AFG	Southern Asia	1950----	spring type	300	16.88	4.77	SAMEA118760217
GB2_12471	TRI 3427	ETH	Eastern Africa	1950----	spring type	500	32.59	8.63	SAMEA118760218
GB2_12472	TRI 3457	RUS	Eastern Europe	1950----	spring type	300	10.02	10.34	SAMEA118760219
GB2_12473	TRI 3458	ITA	Southern Europe	1950----	spring type	500	2.16	8.77	SAMEA118760220
GB2_12474	TRI 3460	DEU	Western Europe	1950----	spring type	500	8.02	6.91	SAMEA118760221
GB2_12475	TRI 3461	DEU	Western Europe	1950----	spring type	500	5.59	8.34	SAMEA118760222
GB2_12476	TRI 3472	PRT	Southern Europe	1952----	spring type	500	16.16	6.48	SAMEA118760223
GB2_12477	TRI 3474	RUS	Eastern Europe	1951----	spring type	500	4.44	2.9	SAMEA118760224
GB2_12479	TRI 3484	ETH	Eastern Africa	1952----	spring type	500	11.66	2.9	SAMEA118760225
GB2_12480	TRI 3491	ITA	Southern Europe	1951----	spring type	300	2.99	2.9	SAMEA118760226
GB2_12481	TRI 3492	NPL	Southern Asia	1947----	spring type	300	26.87	3.47	SAMEA118760227
GB2_12482	TRI 3495	ITA	Southern Europe	1951----	spring type	300	9.82	4.33	SAMEA118760228
GB2_12483	TRI 3496	ITA	Southern Europe	1951----	spring type	300	3.3	3.62	SAMEA118760229
GB2_12484	TRI 3500	AUS	Australia and New Zealand	1949----	spring type	500	4.73	4.19	SAMEA118760230
GB2_12485	TRI 3510	PRT	Southern Europe	1949----	spring type	500	19.87	5.47	SAMEA118760231
GB2_12486	TRI 3524	FRA	Western Europe	1949----	spring type	500	13.59	5.47	SAMEA118760232
GB2_12487	TRI 3525	PRT	Southern Europe	1949----	spring type	500	2.16	5.4	SAMEA118760233
GB2_12488	TRI 3526	PRT	Southern Europe	1949----	spring type	500	7.73	4.47	SAMEA118760234
GB2_12489	TRI 3529	PRT	Southern Europe	1949----	spring type	500	16.73	7.47	SAMEA118760235
GB2_12490	TRI 3530	FRA	Western Europe	1949----	spring type	500	9.59	5.24	SAMEA118760236
GB2_12491	TRI 3532	PRT	Southern Europe	1949----	spring type	300	21.16	5.24	SAMEA118760237
GB2_12492	TRI 3534	PRT	Southern Europe	1949----	spring type	500	11.12	5.19	SAMEA118760238
GB2_12493	TRI 3535	IND	Southern Asia	1947----	spring type	300	12.55	10.1	SAMEA118760239
GB2_12494	TRI 3537	AFG	Southern Asia	1947----	spring type	300	-0.45	5.47	SAMEA118760240
GB2_12495	TRI 3539	IND	Southern Asia	1947----	spring type	300	23.7	6.07	SAMEA118760241
GB2_12496	TRI 3541	PRT	Southern Europe	1949----	spring type	100	13.41	9.33	SAMEA118760242
GB2_12497	TRI 3546	BRA	South America	1949----	spring type	100	20.12	6.62	SAMEA118760243
GB2_12499	TRI 3549	CHN	Eastern Asia	1947----	spring type	300	4.95	5.42	SAMEA118760244
GB2_12500	TRI 3555	IND	Southern Asia	1947----	spring type	300	11.55	2.56	SAMEA118760245
GB2_12501	TRI 3559	IND	Southern Asia	1949----	spring type	500	10.41	5.1	SAMEA118760246
GB2_12502	TRI 3561	IND	Southern Asia	1947----	spring type	300	20.84	6.87	SAMEA118760247
GB2_12503	TRI 3564	PRT	Southern Europe	1949----	spring type	100	18.89	6.56	SAMEA118760248
GB2_12504	TRI 3569	URY	South America	1949----	spring type	500	9.98	6.13	SAMEA118760249
GB2_12505	TRI 3570	IND	Southern Asia	1947----	spring type	500	32.72	3.54	SAMEA118760250
GB2_12506	TRI 3572	AFG	Southern Asia	1947----	spring type	300	14.7	0.54	SAMEA118760251
GB2_12507	TRI 3580	CHN	Eastern Asia	1947----	spring type	300	0.41	0.7	SAMEA118760252
GB2_12508	TRI 3582	CHN	Eastern Asia	1953----	spring type	300	0.55	0.42	SAMEA118760253
GB2_12509	TRI 3585	CHN	Eastern Asia	1953----	spring type	300	22.27	4.85	SAMEA118760254
GB2_12510	TRI 3586	CHN	Eastern Asia	1953----	spring type	500	38.98	3.85	SAMEA118760255
GB2_12511	TRI 3587	CHN	Eastern Asia	1947----	spring type	300	-0.45	3.42	SAMEA118760257
GB2_12512	TRI 3595	TUR	Western Asia	1950----	spring type	300	10.12	2.7	SAMEA118760258
GB2_12514	TRI 3599	CHN	Eastern Asia	1947----	spring type	300	1.48	6.28	SAMEA118760259
GB2_12515	TRI 3606	NZL	Australia and New Zealand	1952----	spring type	500	6.48	11.99	SAMEA118760260
GB2_12516	TRI 3607	CHN	Eastern Asia	1947----	spring type	300	5.41	1.99	SAMEA118760261
GB2_12517	TRI 3609	CHN	Eastern Asia	1947----	spring type	300	1.27	-0.01	SAMEA118760262
GB2_12518	TRI 3611	NPL	Southern Asia	1947----	spring type	300	12.82	6.85	SAMEA118760263
GB2_12519	TRI 3618	CHN	Eastern Asia	1947----	spring type	300	1.98	10.7	SAMEA118760264
GB2_12520	TRI 3625	IND	Southern Asia	1947----	spring type	300	9.98	0.94	SAMEA118760265
GB2_12521	TRI 3627	CAN	Northern America	1951----	spring type	500	9.55	2	SAMEA118760266
GB2_12522	TRI 3628	NPL	Southern Asia	1947----	spring type	300	22.41	2.31	SAMEA118760267
GB2_12523	TRI 3630	AFG	Southern Asia	1947----	spring type	300	23.27	2.28	SAMEA118760268
GB2_12524	TRI 3631	CAN	Northern America	1951----	spring type	500	9.98	-0.43	SAMEA118760269
GB2_12525	TRI 3633	CAN	Northern America	1951----	spring type	500	0.98	3.57	SAMEA118760270
GB2_12526	TRI 3638	POL	Eastern Europe	1953----	spring type	500	9.7	6.57	SAMEA118760271
GB2_12527	TRI 3645	PRT	Southern Europe	1953----	spring type	500	1.65	5.14	SAMEA118760272
GB2_12528	TRI 3827	PRT	Southern Europe	1949----	spring type	500	12.13	6.86	SAMEA118760273
GB2_12529	TRI 3829	PRT	Southern Europe	1949----	spring type	500	14.18	11.81	SAMEA118760274
GB2_12530	TRI 3831	PRT	Southern Europe	1949----	spring type	500	9.84	3.71	SAMEA118760275
GB2_12531	TRI 3832	PRT	Southern Europe	1949----	spring type	500	12.55	8.86	SAMEA118760276
GB2_12532	TRI 3834	PRT	Southern Europe	1949----	spring type	500	12.27	4.57	SAMEA118760277
GB2_12533	TRI 3836	PRT	Southern Europe	1949----	spring type	300	28.98	3.57	SAMEA118760278
GB2_12534	TRI 3837	PRT	Southern Europe	1949----	spring type	300	17.35	3	SAMEA118760279
GB2_12535	TRI 3839	FRA	Western Europe	1949----	spring type	500	5.49	8.28	SAMEA118760280
GB2_12536	TRI 3840	PRT	Southern Europe	1949----	spring type	500	1.64	2.48	SAMEA118760281
GB2_12537	TRI 3843	PRT	Southern Europe	1949----	spring type	100	4.83	4.57	SAMEA118760282
GB2_12538	TRI 3847	PRT	Southern Europe	1949----	spring type	500	7.99	1.48	SAMEA118760283
GB2_12539	TRI 3850	PRT	Southern Europe	1949----	spring type	500	1.66	3.43	SAMEA118760284
GB2_12540	TRI 3860	ITA	Southern Europe	1951----	spring type	300	-0.36	2.53	SAMEA118760285
GB2_12541	TRI 3861	ITA	Southern Europe	1951----	spring type	300	10.07	5.06	SAMEA118760286
GB2_12542	TRI 3865	ITA	Southern Europe	1951----	spring type	300	12.64	2.91	SAMEA118760287
GB2_12543	TRI 3866	ITA	Southern Europe	1951----	spring type	300	0.49	4.34	SAMEA118760288
GB2_12544	TRI 3872	ITA	Southern Europe	1951----	spring type	300	18.21	2.87	SAMEA118760289
GB2_12545	TRI 3874	ITA	Southern Europe	1951----	spring type	300	3.21	3.63	SAMEA118760290
GB2_12546	TRI 3875	ITA	Southern Europe	1951----	spring type	500	4.21	1.2	SAMEA118760291
GB2_12547	TRI 3884	ITA	Southern Europe	1951----	spring type	300	8.16	1.2	SAMEA118760292
GB2_12548	TRI 3886	ITA	Southern Europe	1951----	spring type	300	3.78	6.2	SAMEA118760293
GB2_12549	TRI 3901	FRA	Western Europe	1949----	spring type	500	11.49	3.87	SAMEA118760294
GB2_12550	TRI 3904	PRT	Southern Europe	1949----	spring type	500	-0.65	1.2	SAMEA118760295
GB2_12551	TRI 3906	IND	Southern Asia	1949----	spring type	500	17.64	10.63	SAMEA118760296
GB2_12552	TRI 3907	PRT	Southern Europe	1949----	spring type	500	8.35	12.2	SAMEA118760297
GB2_12553	TRI 3913	PRT	Southern Europe	1949----	spring type	500	7.09	12.49	SAMEA118760298
GB2_12595	TRI 4026	IND	Southern Asia	1947----	spring type	300	11.54	3.48	SAMEA118760335
GB2_12596	TRI 4030	IND	Southern Asia	1947----	spring type	300	29.43	9.48	SAMEA118760336
GB2_12597	TRI 4031	CHN	Eastern Asia	1947----	spring type	300	21.83	3.63	SAMEA118760337
GB2_12598	TRI 4052	IND	Southern Asia	1947----	spring type	300	12.25	5.55	SAMEA118760338
GB2_12599	TRI 4054	AFG	Southern Asia	1951----	spring type	300	14.68	2.72	SAMEA118760339
GB2_12600	TRI 4056	IND	Southern Asia	1955----	spring type	300	8.4	6.05	SAMEA118760340
GB2_12601	TRI 4066	TUN	Northern Africa	1954----	spring type	500	7.33	3.15	SAMEA118760341
GB2_12602	TRI 4072	AFG	Southern Asia	1954----	spring type	300	35.4	3.18	SAMEA118760342
GB2_12603	TRI 4073	AFG	Southern Asia	1954----	spring type	300	7.03	3.41	SAMEA118760343
GB2_12604	TRI 4077	POL	Eastern Europe	1955----	spring type	500	13.54	4.41	SAMEA118760345
GB2_12605	TRI 4084	CHN	Eastern Asia	1955----	spring type	500	10.25	7.82	SAMEA118760346
GB2_12606	TRI 4086	CHN	Eastern Asia	1955----	spring type	500	11.54	5.13	SAMEA118760347
GB2_12607	TRI 4089	CHN	Eastern Asia	1955----	spring type	500	8.25	4.84	SAMEA118760348
GB2_12608	TRI 4091	NPL	Southern Asia	1947----	spring type	300	49.54	6.56	SAMEA118760349
GB2_12609	TRI 4093	CHN	Eastern Asia	1947----	spring type	300	7.11	3.7	SAMEA118760350
GB2_12610	TRI 4095	CHN	Eastern Asia	1947----	spring type	300	26.68	3.84	SAMEA118760351
GB2_12611	TRI 4102	ITA	Southern Europe	1946----	spring type	500	33.54	2.7	SAMEA118760352
GB2_12612	TRI 4111	NA	NA	1955----	spring type	500	9.54	5.56	SAMEA118760353
GB2_12613	TRI 4112	AFG	Southern Asia	1950----	spring type	300	17.97	3.98	SAMEA118760354
GB2_12614	TRI 4113	AFG	Southern Asia	1947----	spring type	300	37.25	6.13	SAMEA118760355
GB2_12615	TRI 4123	ITA	Southern Europe	1952----	spring type	300	25.52	2.84	SAMEA118760356
GB2_12616	TRI 4124	ITA	Southern Europe	1951----	spring type	300	7.09	3.41	SAMEA118760357
GB2_12617	TRI 4125	ITA	Southern Europe	1952----	spring type	300	8.8	2.7	SAMEA118760358
GB2_12618	TRI 4126	ITA	Southern Europe	1951----	spring type	300	9.21	3.98	SAMEA118760359
GB2_12619	TRI 4129	ITA	Southern Europe	1951----	spring type	300	6.66	3.56	SAMEA118760360
GB2_12620	TRI 4130	ITA	Southern Europe	1951----	spring type	300	8.52	1.84	SAMEA118760361
GB2_12661	TRI 4562	CHN	Eastern Asia	1956----	spring type	500	14.73	5.78	SAMEA118760400
GB2_12662	TRI 4563	ITA	Southern Europe	1951----	spring type	300	3.16	-3.22	SAMEA118760401
GB2_12663	TRI 4564	CHN	Eastern Asia	1957----	spring type	300	16.59	1.18	SAMEA118760402
GB2_12664	TRI 4565	CHN	Eastern Asia	1958----	spring type	100	27.73	0.78	SAMEA118760403
GB2_12665	TRI 4566	CHN	Eastern Asia	1958----	spring type	300	16.45	1.21	SAMEA118760404
GB2_12666	TRI 4897	CHL	South America	1959----	spring type	100	3.83	5.28	SAMEA118760405
GB2_12667	TRI 4898	RUS	Eastern Europe	1959----	spring type	100	18.59	4.64	SAMEA118760406
GB2_12668	TRI 4899	CHL	South America	1959----	spring type	100	11.45	3.45	SAMEA118760407
GB2_12669	TRI 4901	CHL	South America	1959----	spring type	100	26.02	3.58	SAMEA118760408
GB2_12670	TRI 4916	CHN	Eastern Asia	1958----	spring type	300	3.49	3.92	SAMEA118760409
GB2_12671	TRI 4915	CHN	Eastern Asia	1947----	spring type	300	5.33	2.45	SAMEA118760410
GB2_12672	TRI 5496	IRN	Southern Asia	1959----	spring type	300	19.02	2.64	SAMEA118760411
GB2_12673	TRI 5495	IRN	Southern Asia	1959----	spring type	300	19.02	12.35	SAMEA118760412
GB2_12674	TRI 4917	BGR	Eastern Europe	1960----	spring type	500	4.83	10.64	SAMEA118760413
GB2_12715	TRI 6182	IRN	Southern Asia	1959----	spring type	300	19.91	10.93	SAMEA118760455
GB2_12716	TRI 5364	ARG	South America	1957----	spring type	500	-8.5	-2.92	SAMEA118760456
GB2_12717	TRI 5366	BRA	South America	1957----	spring type	500	-27.5	1.5	SAMEA118760457
GB2_12718	TRI 5367	ARG	South America	1957----	spring type	500	20.91	1.22	SAMEA118760458
GB2_12719	TRI 5374	ROU	Eastern Europe	1957----	spring type	500	26.91	3.41	SAMEA118760459
GB2_12720	TRI 5375	ROU	Eastern Europe	1957----	spring type	500	-7.09	5.36	SAMEA118760460
GB2_12721	TRI 5378	FIN	Northern Europe	1957----	spring type	500	-4.81	0.97	SAMEA118760461
GB2_12722	TRI 5383	HUN	Eastern Europe	1957----	spring type	500	3.5	2.5	SAMEA118760462
GB2_12723	TRI 5386	BGR	Eastern Europe	1957----	spring type	100	-31.38	-2.36	SAMEA118760463
GB2_12724	TRI 5389	BGR	Eastern Europe	1957----	spring type	500	-31.66	-2.36	SAMEA118760464
GB2_12725	TRI 5391	ITA	Southern Europe	1957----	spring type	500	5.62	6.64	SAMEA118760465
GB2_12726	TRI 5392	ITA	Southern Europe	1957----	spring type	500	-6.24	14.64	SAMEA118760466
GB2_12727	TRI 5398	ITA	Southern Europe	1957----	spring type	500	4.19	14.31	SAMEA118760467
GB2_12728	TRI 5401	NPL	Southern Asia	1947----	spring type	300	8	4.64	SAMEA118760437
GB2_12729	TRI 5406	AFG	Southern Asia	1947----	spring type	300	6.62	1.21	SAMEA118760468
GB2_12730	TRI 5407	CHN	Eastern Asia	1947----	spring type	300	8.76	1.97	SAMEA118760469
GB2_12731	TRI 5413	CHL	South America	1959----	spring type	100	-0.09	8.07	SAMEA118760470
GB2_12732	TRI 5414	CHL	South America	1959----	spring type	100	1.76	7.92	SAMEA118760471
GB2_12733	TRI 5424	USA	Northern America	1961----	spring type	500	-9.5	4.5	SAMEA118760472
GB2_12734	TRI 5426	SWE	Northern Europe	1961----	spring type	500	10.5	8.47	SAMEA118760473
GB2_12735	TRI 5429	DEU	Western Europe	1961----	spring type	500	2.07	7.35	SAMEA118760474
GB2_12736	TRI 5430	DEU	Western Europe	1961----	spring type	500	-15.36	1.64	SAMEA118760475
GB2_12737	TRI 5432	FRA	Western Europe	1961----	spring type	500	-19.26	-0.08	SAMEA118760476
GB2_12738	TRI 5435	DEU	Western Europe	1961----	spring type	500	-19.26	6.5	SAMEA118760477
GB2_12739	TRI 5436	DEU	Western Europe	1961----	spring type	500	14.24	9.5	SAMEA118760478
GB2_12740	TRI 5438	USA	Northern America	1961----	spring type	500	-5.43	4.35	SAMEA118760479
GB2_12741	TRI 5440	POL	Eastern Europe	1961----	spring type	500	0.67	8.51	SAMEA118760480
GB2_12742	TRI 5444	DEU	Western Europe	1961----	spring type	500	-1.76	6.92	SAMEA118760481
GB2_12743	TRI 5466	ESP	Southern Europe	1961----	spring type	500	-9.62	4.77	SAMEA118760482
GB2_12746	TRI 5487	IRN	Southern Asia	1959----	spring type	300	1.24	4.06	SAMEA118760483
GB2_12747	TRI 5491	IRN	Southern Asia	1959----	spring type	300	6.24	5.35	SAMEA118760484
GB2_12748	TRI 5492	IRN	Southern Asia	1959----	spring type	300	-5.33	9.63	SAMEA118760485
GB2_12749	TRI 5503	IRN	Southern Asia	1959----	spring type	300	4.57	9.15	SAMEA118760486
GB2_12750	TRI 5502	IRN	Southern Asia	1959----	spring type	300	19.57	4.92	SAMEA118760487
GB2_12751	TRI 5504	IRN	Southern Asia	1959----	spring type	300	6.67	5.06	SAMEA118760488
GB2_12752	TRI 5505	IRN	Southern Asia	1959----	spring type	300	10.81	3.92	SAMEA118760489
GB2_12753	TRI 5506	IRN	Southern Asia	1959----	spring type	300	6.81	5.92	SAMEA118760490
GB2_12754	TRI 5512	IRN	Southern Asia	1959----	spring type	300	2.1	6.55	SAMEA118760491
GB2_12755	TRI 5520	IRN	Southern Asia	1959----	spring type	300	12.1	8.51	SAMEA118760492
GB2_12757	TRI 5537	IRN	Southern Asia	1959----	spring type	300	-5.02	2.63	SAMEA118760493
GB2_12758	TRI 5540	IRN	Southern Asia	1959----	spring type	300	-5.85	3.35	SAMEA118760494
GB2_12759	TRI 5543	IRN	Southern Asia	1959----	spring type	300	2.72	2.63	SAMEA118760495
GB2_12760	TRI 5545	IRN	Southern Asia	1959----	spring type	300	15.86	3.63	SAMEA118760496
GB2_12761	TRI 5550	IRN	Southern Asia	1959----	spring type	300	17.29	4.35	SAMEA118760497
GB2_12762	TRI 5565	IRN	Southern Asia	1959----	spring type	300	-0.71	3.06	SAMEA118760498
GB2_12763	TRI 5568	IRN	Southern Asia	1959----	spring type	300	5.72	2.8	SAMEA118760499
GB2_12764	TRI 5569	IRN	Southern Asia	1959----	spring type	300	2.58	2.09	SAMEA118760500
GB2_12766	TRI 5578	IRN	Southern Asia	1959----	spring type	300	-3.28	2.51	SAMEA118760501
GB2_12767	TRI 5581	IRN	Southern Asia	1959----	spring type	300	-3.85	3.37	SAMEA118760502
GB2_12768	TRI 5582	IRN	Southern Asia	1959----	spring type	300	-5.52	3.13	SAMEA118760503
GB2_12769	TRI 5584	IRN	Southern Asia	1959----	spring type	300	5.31	3.8	SAMEA118760504
GB2_12770	TRI 5585	IRN	Southern Asia	1959----	spring type	300	1.15	3.23	SAMEA118760505
GB2_12771	TRI 5586	IRN	Southern Asia	1959----	spring type	300	3.43	3.47	SAMEA118760506
GB2_12772	TRI 5588	IRN	Southern Asia	1959----	spring type	300	3.58	5.09	SAMEA118760507
GB2_12773	TRI 5592	IRN	Southern Asia	1959----	spring type	300	2.86	9.09	SAMEA118760508
GB2_12774	TRI 5594	IRN	Southern Asia	1959----	spring type	300	16.31	6.09	SAMEA118760509
GB2_12775	TRI 5595	IRN	Southern Asia	1959----	spring type	300	15.29	3.8	SAMEA118760510
GB2_12776	TRI 5596	IRN	Southern Asia	1959----	spring type	300	-5.85	3.8	SAMEA118760511
GB2_12777	TRI 5597	IRN	Southern Asia	1959----	spring type	300	-8.78	5.09	SAMEA118760512
GB2_12778	TRI 5598	IRN	Southern Asia	1959----	spring type	300	-3.73	4.23	SAMEA118760513
GB2_12779	TRI 5600	IRN	Southern Asia	1959----	spring type	300	-8.49	4.66	SAMEA118760514
GB2_12780	TRI 5603	IRN	Southern Asia	1959----	spring type	300	-7.78	3.13	SAMEA118760515
GB2_12781	TRI 5605	IRN	Southern Asia	1959----	spring type	300	10.34	2.37	SAMEA118760516
GB2_12782	TRI 5607	IRN	Southern Asia	1959----	spring type	300	7.22	2.47	SAMEA118760517
GB2_12823	TRI 5702	IRN	Southern Asia	1959----	spring type	300	21.66	2.3	SAMEA118760559
GB2_12824	TRI 5703	IRN	Southern Asia	1959----	spring type	300	38.38	2.79	SAMEA118760560
GB2_12825	TRI 5704	IRN	Southern Asia	1959----	spring type	300	16.52	0.17	SAMEA118760561
GB2_12826	TRI 5705	IRN	Southern Asia	1959----	spring type	300	51.09	0.93	SAMEA118760530
GB2_12827	TRI 5715	IRN	Southern Asia	1959----	spring type	300	20.23	2.5	SAMEA118760562
GB2_12828	TRI 5716	IRN	Southern Asia	1959----	spring type	300	20.07	4.93	SAMEA118760563
GB2_12830	TRI 5719	IRN	Southern Asia	1959----	spring type	300	13.57	5	SAMEA118760564
GB2_12831	TRI 5722	IRN	Southern Asia	1959----	spring type	300	12.52	4.79	SAMEA118760565
GB2_12832	TRI 5723	IRN	Southern Asia	1959----	spring type	300	14.09	5.5	SAMEA118760566
GB2_12833	TRI 5728	IRN	Southern Asia	1959----	spring type	300	-0.77	5.5	SAMEA118760567
GB2_12834	TRI 5729	IRN	Southern Asia	1959----	spring type	300	28.09	4.22	SAMEA118760568
GB2_12835	TRI 5732	IRN	Southern Asia	1959----	spring type	300	11.23	2.07	SAMEA118760569
GB2_12836	TRI 5736	IRN	Southern Asia	1959----	spring type	300	25.81	4.22	SAMEA118760570
GB2_12837	TRI 5737	IRN	Southern Asia	1959----	spring type	300	27.38	2.84	SAMEA118760571
GB2_12838	TRI 5745	IRN	Southern Asia	1959----	spring type	300	20.04	4.9	SAMEA118760572
GB2_12839	TRI 5746	IRN	Southern Asia	1959----	spring type	300	-9.11	6.5	SAMEA118760573
GB2_12840	TRI 5753	IRN	Southern Asia	1959----	spring type	300	-19.34	5.22	SAMEA118760574
GB2_12841	TRI 5752	IRN	Southern Asia	1959----	spring type	300	-16.01	5.22	SAMEA118760575
GB2_12842	TRI 5750	IRN	Southern Asia	1959----	spring type	300	-19.68	2.5	SAMEA118760576
GB2_12843	TRI 5950	IRN	Southern Asia	1959----	spring type	300	-19.68	-0.93	SAMEA118760577
GB2_12844	TRI 5754	IRN	Southern Asia	1959----	spring type	300	-3.11	4.11	SAMEA118760578
GB2_12845	TRI 5755	IRN	Southern Asia	1959----	spring type	300	-14.11	2.82	SAMEA118760579
GB2_12846	TRI 5756	IRN	Southern Asia	1959----	spring type	300	7.61	3.18	SAMEA118760580
GB2_12847	TRI 5757	IRN	Southern Asia	1959----	spring type	300	1.89	2.82	SAMEA118760581
GB2_12848	TRI 5761	IRN	Southern Asia	1959----	spring type	300	13.49	1.68	SAMEA118760582
GB2_12849	TRI 5762	IRN	Southern Asia	1959----	spring type	300	0.66	4.68	SAMEA118760583
GB2_12850	TRI 5763	IRN	Southern Asia	1959----	spring type	300	11.61	4.54	SAMEA118760584
GB2_12851	TRI 5765	IRN	Southern Asia	1959----	spring type	300	-5.25	0.39	SAMEA118760585
GB2_12852	TRI 5766	IRN	Southern Asia	1959----	spring type	300	0.18	2.01	SAMEA118760586
GB2_12853	TRI 5767	IRN	Southern Asia	1959----	spring type	300	17.32	1.11	SAMEA118760587
GB2_12854	TRI 5768	IRN	Southern Asia	1959----	spring type	300	27.49	3.68	SAMEA118760588
GB2_12855	TRI 5775	IRN	Southern Asia	1959----	spring type	300	2.75	2.11	SAMEA118760589
GB2_12856	TRI 5776	IRN	Southern Asia	1959----	spring type	300	13.99	4.18	SAMEA118760590
GB2_12857	TRI 5777	IRN	Southern Asia	1959----	spring type	300	8.32	5.54	SAMEA118760591
GB2_12858	TRI 5778	IRN	Southern Asia	1959----	spring type	300	23.47	8.54	SAMEA118760592
GB2_12859	TRI 5779	IRN	Southern Asia	1959----	spring type	300	4.47	5.82	SAMEA118760593
GB2_12860	TRI 5780	IRN	Southern Asia	1959----	spring type	300	11.66	7.25	SAMEA118760594
GB2_12861	TRI 5781	IRN	Southern Asia	1959----	spring type	300	3.95	1.01	SAMEA118760595
GB2_12862	TRI 5782	IRN	Southern Asia	1959----	spring type	300	14.23	1.48	SAMEA118760596
GB2_12863	TRI 5785	IRN	Southern Asia	1959----	spring type	300	9.38	2.39	SAMEA118760597
GB2_12864	TRI 5787	IRN	Southern Asia	1959----	spring type	300	5.6	1.94	SAMEA118760598
GB2_12865	TRI 5788	IRN	Southern Asia	1959----	spring type	300	-9.2	2.37	SAMEA118760599
GB2_12866	TRI 5789	IRN	Southern Asia	1959----	spring type	300	7.52	6.22	SAMEA118760600
GB2_12867	TRI 5795	IRN	Southern Asia	1959----	spring type	300	-8.86	5.37	SAMEA118760601
GB2_12868	TRI 5796	IRN	Southern Asia	1959----	spring type	300	-7.34	6.65	SAMEA118760602
GB2_12869	TRI 5797	IRN	Southern Asia	1959----	spring type	300	-9.2	5.22	SAMEA118760603
GB2_12870	TRI 5798	IRN	Southern Asia	1959----	spring type	300	-9.2	5.1	SAMEA118760604
GB2_12871	TRI 5799	IRN	Southern Asia	1959----	spring type	300	6.97	1.79	SAMEA118760605
GB2_12872	TRI 5802	IRN	Southern Asia	1959----	spring type	300	3.8	5.94	SAMEA118760606
GB2_12873	TRI 5803	IRN	Southern Asia	1959----	spring type	300	-2.62	3.51	SAMEA118760607
GB2_12874	TRI 5805	IRN	Southern Asia	1960----	spring type	300	-8.77	6.08	SAMEA118760608
GB2_12875	TRI 5808	IRN	Southern Asia	1959----	spring type	300	14.09	8.65	SAMEA118760609
GB2_12876	TRI 5809	IRN	Southern Asia	1959----	spring type	300	-9.2	4.65	SAMEA118760610
GB2_12877	TRI 5815	IRN	Southern Asia	1959----	spring type	300	0.23	8.27	SAMEA118760611
GB2_12878	TRI 5816	IRN	Southern Asia	1959----	spring type	300	3.84	4.1	SAMEA118760612
GB2_12879	TRI 5817	IRN	Southern Asia	1959----	spring type	300	-2.14	2.94	SAMEA118760613
GB2_12880	TRI 5818	IRN	Southern Asia	1959----	spring type	300	-2.02	3.37	SAMEA118760614
GB2_12881	TRI 5819	IRN	Southern Asia	1959----	spring type	300	-2.02	2.94	SAMEA118760615
GB2_12882	TRI 5822	IRN	Southern Asia	1959----	spring type	300	3.55	5.51	SAMEA118760616
GB2_12883	TRI 6255	IRN	Southern Asia	1959----	spring type	300	-1.64	2.37	SAMEA118760617
GB2_12884	TRI 6253	IRN	Southern Asia	1959----	spring type	300	11.86	3.84	SAMEA118760618
GB2_12885	TRI 5829	IRN	Southern Asia	1959----	spring type	300	8.84	5.84	SAMEA118760619
GB2_12886	TRI 5831	IRN	Southern Asia	1959----	spring type	300	18.53	5.55	SAMEA118760620
GB2_12888	TRI 5834	IRN	Southern Asia	1959----	spring type	300	21.41	6.55	SAMEA118760622
GB2_12889	TRI 5835	IRN	Southern Asia	1959----	spring type	300	7.41	6.84	SAMEA118760624
GB2_12890	TRI 5837	IRN	Southern Asia	1959----	spring type	300	2.55	6.12	SAMEA118760625
GB2_12891	TRI 5838	IRN	Southern Asia	1959----	spring type	300	8.41	7.12	SAMEA118760626
GB2_12892	TRI 5839	IRN	Southern Asia	1959----	spring type	300	10.55	6.12	SAMEA118760627
GB2_12893	TRI 5841	IRN	Southern Asia	1959----	spring type	300	8.69	-2.3	SAMEA118760628
GB2_12894	TRI 5842	IRN	Southern Asia	1959----	spring type	300	21.69	11.12	SAMEA118760629
GB2_12895	TRI 5845	IRN	Southern Asia	1959----	spring type	300	30.84	5.5	SAMEA118760630
GB2_12896	TRI 5846	IRN	Southern Asia	1958----	spring type	300	-1.45	5.84	SAMEA118760631
GB2_12897	TRI 5848	IRN	Southern Asia	1959----	spring type	300	37.19	2.12	SAMEA118760632
GB2_12898	TRI 5849	IRN	Southern Asia	1959----	spring type	300	23	11.55	SAMEA118760633
GB2_12899	TRI 5850	IRN	Southern Asia	1959----	spring type	300	5.29	7.98	SAMEA118760634
GB2_12900	TRI 6292	IRN	Southern Asia	1959----	spring type	300	7.58	3.36	SAMEA118760635
GB2_12901	TRI 6291	IRN	Southern Asia	1959----	spring type	300	3.5	5.27	SAMEA118760636
GB2_12902	TRI 5857	IRN	Southern Asia	1959----	spring type	300	3	1.55	SAMEA118760637
GB2_12903	TRI 5858	IRN	Southern Asia	1959----	spring type	300	6.29	2.27	SAMEA118760638
GB2_12904	TRI 5859	IRN	Southern Asia	1959----	spring type	300	4.17	3	SAMEA118760639
GB2_12905	TRI 5868	IRN	Southern Asia	1959----	spring type	300	25.43	2.71	SAMEA118760640
GB2_12906	TRI 5870	IRN	Southern Asia	1959----	spring type	300	3	1.85	SAMEA118760641
GB2_12907	TRI 5871	IRN	Southern Asia	1959----	spring type	300	7	1.57	SAMEA118760642
GB2_12908	TRI 5873	IRN	Southern Asia	1959----	spring type	300	3.5	4.71	SAMEA118760643
GB2_12909	TRI 5877	IRN	Southern Asia	1959----	spring type	300	3.34	7.57	SAMEA118760644
GB2_12910	TRI 5878	IRN	Southern Asia	1959----	spring type	300	7.29	4.9	SAMEA118760645
GB2_12911	TRI 5881	IRN	Southern Asia	1959----	spring type	300	8.86	0.14	SAMEA118760646
GB2_12912	TRI 5884	IRN	Southern Asia	1959----	spring type	300	5.15	0.28	SAMEA118760647
GB2_12913	TRI 5886	IRN	Southern Asia	1959----	spring type	300	3.84	-0.43	SAMEA118760648
GB2_12914	TRI 5887	IRN	Southern Asia	1959----	spring type	300	3	0.24	SAMEA118760649
GB2_12915	TRI 5889	IRN	Southern Asia	1959----	spring type	300	9.43	1.9	SAMEA118760650
GB2_12916	TRI 5890	IRN	Southern Asia	1959----	spring type	300	3.17	1.24	SAMEA118760651
GB2_12917	TRI 5891	IRN	Southern Asia	1959----	spring type	300	3	0.57	SAMEA118760652
GB2_12918	TRI 5892	IRN	Southern Asia	1959----	spring type	300	-2.28	6.28	SAMEA118760653
GB2_12919	TRI 5893	IRN	Southern Asia	1959----	spring type	300	1.58	9.24	SAMEA118760654
GB2_12920	TRI 5894	IRN	Southern Asia	1959----	spring type	300	-2.61	2.28	SAMEA118760655
GB2_12921	TRI 5895	IRN	Southern Asia	1959----	spring type	300	0.58	2.57	SAMEA118760623
GB2_12922	TRI 5898	IRN	Southern Asia	1959----	spring type	300	-1.78	2.9	SAMEA118760656
GB2_12923	TRI 5899	IRN	Southern Asia	1959----	spring type	300	-3.28	2	SAMEA118760657
GB2_12924	TRI 5902	IRN	Southern Asia	1959----	spring type	300	-2.57	1.86	SAMEA118760658
GB2_12925	TRI 5903	IRN	Southern Asia	1959----	spring type	300	39.86	7	SAMEA118760659
GB2_12926	TRI 5907	IRN	Southern Asia	1959----	spring type	300	29.01	7	SAMEA118760660
GB2_12927	TRI 5913	IRN	Southern Asia	1959----	spring type	300	15.72	2.57	SAMEA118760661
GB2_12928	TRI 5914	IRN	Southern Asia	1959----	spring type	300	-3.28	4.14	SAMEA118760662
GB2_12929	TRI 5920	IRN	Southern Asia	1959----	spring type	300	32.72	10.86	SAMEA118760663
GB2_12930	TRI 5924	IRN	Southern Asia	1959----	spring type	300	31.89	11.57	SAMEA118760664
GB2_12931	TRI 5928	IRN	Southern Asia	1959----	spring type	300	15.86	5.57	SAMEA118760665
GB2_12932	TRI 5931	IRN	Southern Asia	1959----	spring type	300	5.58	5.14	SAMEA118760666
GB2_12933	TRI 5934	IRN	Southern Asia	1959----	spring type	300	18.01	3.62	SAMEA118760667
GB2_12934	TRI 5937	IRN	Southern Asia	1959----	spring type	300	28.05	5.72	SAMEA118760668
GB2_12935	TRI 5938	IRN	Southern Asia	1959----	spring type	300	15.58	1.29	SAMEA118760669
GB2_12936	TRI 5940	IRN	Southern Asia	1959----	spring type	300	28.72	4.49	SAMEA118760670
GB2_12937	TRI 5941	IRN	Southern Asia	1959----	spring type	300	20.01	4.29	SAMEA118760671
GB2_12938	TRI 5942	IRN	Southern Asia	1959----	spring type	300	28.46	7.57	SAMEA118760672
GB2_12939	TRI 5943	IRN	Southern Asia	1959----	spring type	300	17.75	4.86	SAMEA118760673
GB2_12940	TRI 5944	IRN	Southern Asia	1959----	spring type	300	17.75	1.57	SAMEA118760674
GB2_12941	TRI 5945	IRN	Southern Asia	1959----	spring type	300	19.39	2.86	SAMEA118760675
GB2_12942	TRI 5947	IRN	Southern Asia	1959----	spring type	300	-3.11	5	SAMEA118760676
GB2_12943	TRI 5959	IRN	Southern Asia	1959----	spring type	300	-2.31	2.62	SAMEA118760677
GB2_12944	TRI 5963	IRN	Southern Asia	1959----	spring type	300	-3.11	0.5	SAMEA118760678
GB2_12945	TRI 5964	IRN	Southern Asia	1959----	spring type	300	-3.11	1.2	SAMEA118760679
GB2_12946	TRI 5967	IRN	Southern Asia	1959----	spring type	300	1.23	5.14	SAMEA118760680
GB2_12947	TRI 5969	IRN	Southern Asia	1959----	spring type	300	-2.54	4.14	SAMEA118760681
GB2_12948	TRI 5970	IRN	Southern Asia	1959----	spring type	300	-3.11	7.71	SAMEA118760682
GB2_12949	TRI 5975	IRN	Southern Asia	1959----	spring type	300	12.04	7.29	SAMEA118760683
GB2_12950	TRI 5978	IRN	Southern Asia	1959----	spring type	300	11.61	5.29	SAMEA118760684
GB2_12951	TRI 5980	IRN	Southern Asia	1959----	spring type	300	14.46	1.86	SAMEA118760685
GB2_12952	TRI 5981	IRN	Southern Asia	1959----	spring type	300	9.56	1.17	SAMEA118760686
GB2_12953	TRI 5982	IRN	Southern Asia	1959----	spring type	300	5.18	0.71	SAMEA118760687
GB2_12954	TRI 5983	IRN	Southern Asia	1959----	spring type	300	19.56	14.5	SAMEA118760688
GB2_12955	TRI 5991	IRN	Southern Asia	1959----	spring type	300	17.46	12.33	SAMEA118760689
GB2_12956	TRI 5996	IRN	Southern Asia	1959----	spring type	300	5.06	8	SAMEA118760690
GB2_12957	TRI 5997	IRN	Southern Asia	1959----	spring type	300	4.46	4.67	SAMEA118760691
GB2_12958	TRI 6001	IRN	Southern Asia	1959----	spring type	300	-11.78	14	SAMEA118760692
GB2_12959	TRI 6005	IRN	Southern Asia	1959----	spring type	300	-1.59	9.71	SAMEA118760693
GB2_12960	TRI 6007	IRN	Southern Asia	1959----	spring type	300	-14.59	9	SAMEA118760694
GB2_12961	TRI 6012	IRN	Southern Asia	1960----	spring type	300	-7.44	2.57	SAMEA118760695
GB2_12962	TRI 6013	IRN	Southern Asia	1959----	spring type	300	19.7	5.83	SAMEA118760696
GB2_12963	TRI 6016	IRN	Southern Asia	1959----	spring type	300	7.56	6.43	SAMEA118760697
GB2_12964	TRI 6018	IRN	Southern Asia	1959----	spring type	300	5.06	5	SAMEA118760698
GB2_12965	TRI 6024	IRN	Southern Asia	1959----	spring type	300	0.98	3.71	SAMEA118760699
GB2_12966	TRI 6044	IRN	Southern Asia	1959----	spring type	300	3.41	3.29	SAMEA118760700
GB2_12967	TRI 6042	IRN	Southern Asia	1959----	spring type	300	3.84	4	SAMEA118760701
GB2_12968	TRI 6041	IRN	Southern Asia	1959----	spring type	300	5.98	9.2	SAMEA118760702
GB2_12969	TRI 6040	IRN	Southern Asia	1959----	spring type	300	18.13	6	SAMEA118760703
GB2_12970	TRI 6038	IRN	Southern Asia	1959----	spring type	300	14.41	7.86	SAMEA118760704
GB2_12971	TRI 6037	IRN	Southern Asia	1959----	spring type	300	17.41	5.5	SAMEA118760705
GB2_12972	TRI 6033	IRN	Southern Asia	1959----	spring type	300	1.89	2	SAMEA118760706
GB2_12973	TRI 6032	IRN	Southern Asia	1959----	spring type	300	5.56	1.43	SAMEA118760707
GB2_12974	TRI 6031	IRN	Southern Asia	1959----	spring type	300	-18.44	2.29	SAMEA118760708
GB2_12975	TRI 6030	IRN	Southern Asia	1959----	spring type	300	-18.44	2.57	SAMEA118760709
GB2_12976	TRI 6052	IRN	Southern Asia	1959----	spring type	300	-1.28	2.57	SAMEA118760710
GB2_12977	TRI 6057	IRN	Southern Asia	1959----	spring type	300	4.27	1.86	SAMEA118760711
GB2_12978	TRI 6058	IRN	Southern Asia	1959----	spring type	300	-7.74	6.8	SAMEA118760712
GB2_12979	TRI 6059	IRN	Southern Asia	1959----	spring type	300	5.09	9	SAMEA118760713
GB2_12980	TRI 6064	IRN	Southern Asia	1959----	spring type	300	14.76	5.33	SAMEA118760714
GB2_12981	TRI 6065	IRN	Southern Asia	1959----	spring type	300	10.42	11.14	SAMEA118760715
GB2_12982	TRI 7937	KEN	Eastern Africa	1966----	spring type	500	0.26	2.5	SAMEA118760717
GB2_12983	TRI 6072	IRN	Southern Asia	1959----	spring type	300	9.38	5.29	SAMEA118760718
GB2_12984	TRI 6073	IRN	Southern Asia	1959----	spring type	300	15.23	2.04	SAMEA118760719
GB2_12985	TRI 6074	IRN	Southern Asia	1959----	spring type	300	18.42	3.21	SAMEA118760720
GB2_12986	TRI 6075	IRN	Southern Asia	1959----	spring type	300	12.23	5.21	NA
GB2_12987	TRI 6076	IRN	Southern Asia	1959----	spring type	300	23.66	1.88	SAMEA118760721
GB2_12988	TRI 6077	IRN	Southern Asia	1959----	spring type	300	13.38	2.5	SAMEA118760722
GB2_12989	TRI 6078	IRN	Southern Asia	1959----	spring type	300	4.52	2.78	SAMEA118760723
GB2_12990	TRI 6148	IRN	Southern Asia	1959----	spring type	300	5.26	3.64	SAMEA118760724
GB2_12991	TRI 6149	IRN	Southern Asia	1959----	spring type	300	-1.91	3.92	SAMEA118760725
GB2_12992	TRI 6150	IRN	Southern Asia	1959----	spring type	300	24.66	5.35	SAMEA118760726
GB2_12993	TRI 6153	IRN	Southern Asia	1959----	spring type	300	7.38	3.78	SAMEA118760727
GB2_12994	TRI 6159	IRN	Southern Asia	1959----	spring type	300	18.66	3.78	SAMEA118760728
GB2_12995	TRI 6161	IRN	Southern Asia	1959----	spring type	300	27.42	5.78	SAMEA118760729
GB2_12996	TRI 6163	IRN	Southern Asia	1959----	spring type	300	-11.91	1.54	SAMEA118760730
GB2_12997	TRI 6164	IRN	Southern Asia	1959----	spring type	300	-11.48	1.38	SAMEA118760731
GB2_12998	TRI 6165	IRN	Southern Asia	1959----	spring type	300	1.52	1.88	SAMEA118760732
GB2_12999	TRI 6166	IRN	Southern Asia	1959----	spring type	300	3.95	4.78	SAMEA118760733
GB2_13000	TRI 6167	IRN	Southern Asia	1959----	spring type	300	1.38	2.78	SAMEA118760734
GB2_13001	TRI 6168	IRN	Southern Asia	1959----	spring type	300	0.85	2.21	SAMEA118760735
GB2_13002	TRI 6169	IRN	Southern Asia	1959----	spring type	300	4.09	1.78	SAMEA118760736
GB2_13003	TRI 6171	IRN	Southern Asia	1959----	spring type	300	2.66	2.88	SAMEA118760737
GB2_13004	TRI 6111	IRN	Southern Asia	1959----	spring type	300	3.81	4.29	SAMEA118760738
GB2_13005	TRI 6118	IRN	Southern Asia	1959----	spring type	300	16.38	3.47	SAMEA118760739
GB2_13006	TRI 6119	IRN	Southern Asia	1959----	spring type	300	8.95	4.58	SAMEA118760740
GB2_13007	TRI 6113	IRN	Southern Asia	1959----	spring type	300	3.81	4	SAMEA118760741
GB2_13008	TRI 6117	IRN	Southern Asia	1959----	spring type	300	0.52	3	SAMEA118760742
GB2_13009	TRI 6120	IRN	Southern Asia	1959----	spring type	300	1.66	2.72	SAMEA118760743
GB2_13010	TRI 6121	IRN	Southern Asia	1959----	spring type	300	1.02	2.43	SAMEA118760744
GB2_13011	TRI 6129	IRN	Southern Asia	1959----	spring type	300	3.23	6.29	SAMEA118760745
GB2_13012	TRI 6132	IRN	Southern Asia	1959----	spring type	300	23.52	3.72	SAMEA118760746
GB2_13013	TRI 6130	IRN	Southern Asia	1959----	spring type	300	8.66	3.92	SAMEA118760747
GB2_13014	TRI 6080	IRN	Southern Asia	1959----	spring type	300	0.85	3.29	SAMEA118760748
GB2_13015	TRI 4390	FRA	Western Europe	1956----	spring type	500	3.19	2.55	SAMEA118760716
GB2_13016	TRI 4419	CHN	Eastern Asia	1958----	spring type	300	5.52	2.89	SAMEA118760749
GB2_13017	TRI 6087	IRN	Southern Asia	1959----	spring type	300	14.52	3.05	SAMEA118760750
GB2_13018	TRI 6088	IRN	Southern Asia	1959----	spring type	300	5.94	3.58	SAMEA118760751
GB2_13019	TRI 6090	IRN	Southern Asia	1959----	spring type	300	2.52	4.72	SAMEA118760788
GB2_13020	TRI 6092	IRN	Southern Asia	1959----	spring type	300	2.94	4.15	SAMEA118760789
GB2_13021	TRI 6094	IRN	Southern Asia	1959----	spring type	300	-0.2	1.72	SAMEA118760790
GB2_13022	TRI 6096	IRN	Southern Asia	1959----	spring type	300	10.63	2.43	SAMEA118760791
GB2_13023	TRI 6097	IRN	Southern Asia	1959----	spring type	300	1.8	3.39	SAMEA118760792
GB2_13024	TRI 6101	IRN	Southern Asia	1959----	spring type	300	0.52	4.43	SAMEA118760793
GB2_13025	TRI 6102	IRN	Southern Asia	1959----	spring type	300	0.13	4.43	SAMEA118760794
GB2_13026	TRI 6105	IRN	Southern Asia	1959----	spring type	300	10.8	3.86	SAMEA118760795
GB2_13027	TRI 6106	IRN	Southern Asia	1959----	spring type	300	0.13	3.43	SAMEA118760752
GB2_13028	TRI 4167	NA	NA	1951----	spring type	100	0.13	5.86	SAMEA118760753
GB2_13029	TRI 4169	IND	Southern Asia	1953----	spring type	300	19.8	4.43	NA
GB2_13030	TRI 4170	ITA	Southern Europe	1951----	spring type	300	7.09	4.29	NA
GB2_13031	TRI 7660	MAR	Northern Africa	1965----	spring type	500	30	6	SAMEA118760754
GB2_13032	TRI 7650	RUS	Eastern Europe	1965----	spring type	500	5.94	6.57	SAMEA118760755
GB2_13033	TRI 7643	RUS	Eastern Europe	1965----	spring type	500	1.63	4.72	SAMEA118760756
GB2_13034	TRI 7642	RUS	Eastern Europe	1965----	spring type	500	-0.03	7.43	SAMEA118760757
GB2_13035	TRI 7638	RUS	Eastern Europe	1965----	spring type	500	11.8	5.76	SAMEA118760758
GB2_13036	TRI 7636	RUS	Eastern Europe	1965----	spring type	500	2.09	5.23	SAMEA118760759
GB2_13037	TRI 7634	RUS	Eastern Europe	1965----	spring type	500	0.8	5.6	SAMEA118760760
GB2_13038	TRI 7674	ESP	Southern Europe	1965----	spring type	500	20.46	7.57	SAMEA118760761
GB2_13039	TRI 7741	CAN	Northern America	1965----	spring type	500	4.85	6.14	SAMEA118760762
GB2_13040	TRI 7898	FRA	Western Europe	1965----	spring type	500	5.68	6.63	SAMEA118760763
GB2_13041	TRI 7796	MNG	Eastern Asia	1965----	spring type	300	22.89	7.14	SAMEA118760764
GB2_13042	TRI 7795	MNG	Eastern Asia	1965----	spring type	300	4.46	6.72	SAMEA118760765
GB2_13043	TRI 7793	MNG	Eastern Asia	1965----	spring type	300	6.18	5.29	NA
GB2_13044	TRI 7792	MNG	Eastern Asia	1965----	spring type	300	6.01	9.66	SAMEA118760766
GB2_13045	TRI 7791	MNG	Eastern Asia	1965----	spring type	300	13.32	7.37	NA
GB2_13046	TRI 7779	DEU	Western Europe	1965----	spring type	500	6.18	5.23	SAMEA118760767
GB2_13047	TRI 7778	AUT	Western Europe	1965----	spring type	500	8.61	3.66	SAMEA118760768
GB2_13048	TRI 7777	AUT	Western Europe	1965----	spring type	500	19.32	4.94	SAMEA118760769
GB2_13049	TRI 7776	AUT	Western Europe	1965----	spring type	500	20.46	4.37	SAMEA118760770
GB2_13050	TRI 7775	AUT	Western Europe	1965----	spring type	500	4.18	3.8	SAMEA118760771
GB2_13051	TRI 7772	AUT	Western Europe	1965----	spring type	300	4.18	8.23	SAMEA118760772
GB2_13052	TRI 7771	AUT	Western Europe	1965----	spring type	500	5.89	5.8	SAMEA118760773
GB2_13054	TRI 7769	AUT	Western Europe	1965----	spring type	500	14.32	4.09	SAMEA118760774
GB2_13055	TRI 7742	CAN	Northern America	1965----	spring type	500	4.18	4.09	SAMEA118760775
GB2_13056	TRI 7739	CAN	Northern America	1965----	spring type	500	20.89	4.51	SAMEA118760776
GB2_13057	TRI 7680	ESP	Southern Europe	1965----	spring type	300	9.18	4.94	SAMEA118760777
GB2_13058	TRI 7678	ESP	Southern Europe	1965----	spring type	300	22.89	4.94	SAMEA118760778
GB2_13059	TRI 7677	ESP	Southern Europe	1965----	spring type	300	-3.74	7.09	SAMEA118760779
GB2_13060	TRI 7940	PRT	Southern Europe	1966----	spring type	500	-1.16	7.23	SAMEA118760780
GB2_13061	TRI 7935	KEN	Eastern Africa	1966----	spring type	500	10.12	8.09	SAMEA118760781
GB2_13062	TRI 8203	COL	South America	1966----	spring type	500	6.55	12.94	SAMEA118760782
GB2_13063	TRI 8204	USA	Northern America	1966----	spring type	500	-4	4.09	SAMEA118760783
GB2_13064	TRI 7932	KEN	Eastern Africa	1966----	spring type	500	-3.02	3.54	SAMEA118760784
GB2_13065	TRI 7929	KEN	Eastern Africa	1966----	spring type	500	3.26	6.92	SAMEA118760785
GB2_13066	TRI 7905	ROU	Eastern Europe	1965----	spring type	500	16.84	3.06	SAMEA118760786
GB2_13067	TRI 8152	ZAF	Southern Africa	1966----	spring type	500	-0.45	3.92	SAMEA118760787
GB2_13068	TRI 7975	ISR	Western Asia	1966----	spring type	500	1.26	2.23	SAMEA118760796
GB2_13069	TRI 8175	AUT	Western Europe	1966----	spring type	500	15.98	3.35	SAMEA118760797
GB2_13070	TRI 8173	ZAF	Southern Africa	1966----	spring type	500	1.84	1.06	SAMEA118760798
GB2_13071	TRI 8172	TZA	Eastern Africa	1966----	spring type	500	-5.16	1.06	SAMEA118760799
GB2_13072	TRI 8171	DZA	Northern Africa	1966----	spring type	300	22.26	13.63	SAMEA118760800
GB2_13073	TRI 8162	SYR	Western Asia	1966----	spring type	500	13.12	7.35	SAMEA118760801
GB2_13074	TRI 8161	EGY	Northern Africa	1966----	spring type	100	23.26	7.44	SAMEA118760802
GB2_13075	TRI 8159	IRQ	Western Asia	1966----	spring type	300	13.69	7.06	SAMEA118760803
GB2_13076	TRI 8158	IRQ	Western Asia	1966----	spring type	300	5.5	6.63	SAMEA118760805
GB2_13077	TRI 8153	ZAF	Southern Africa	1966----	spring type	100	10.84	6.26	SAMEA118760806
GB2_13078	TRI 7622	RUS	Eastern Europe	1965----	spring type	500	19.41	8.39	SAMEA118760807
GB2_13079	TRI 7591	CAN	Northern America	1966----	spring type	500	5.74	2.73	SAMEA118760808
GB2_13080	TRI 7590	KEN	Eastern Africa	1966----	spring type	500	5.74	5.92	SAMEA118760809
GB2_13081	TRI 7587	KEN	Eastern Africa	1966----	spring type	500	6.74	4.92	SAMEA118760810
GB2_13082	TRI 7582	KEN	Eastern Africa	1966----	spring type	500	9.58	2.23	SAMEA118760811
GB2_13083	TRI 7581	KEN	Eastern Africa	1966----	spring type	500	6.03	1.78	SAMEA118760812
GB2_13084	TRI 7580	USA	Northern America	1966----	spring type	500	5.74	2.63	SAMEA118760813
GB2_13085	TRI 8273	KEN	Eastern Africa	1966----	spring type	500	6.24	2.93	SAMEA118760814
GB2_13086	TRI 8272	KEN	Eastern Africa	1966----	spring type	500	5.91	2.93	SAMEA118760815
GB2_13088	TRI 8269	KEN	Eastern Africa	1966----	spring type	500	12.32	3.93	SAMEA118760816
GB2_13089	TRI 8266	KEN	Eastern Africa	1966----	spring type	500	13.74	5.5	SAMEA118760817
GB2_13090	TRI 8264	KEN	Eastern Africa	1966----	spring type	500	7.46	2.5	SAMEA118760818
GB2_13091	TRI 5306	DEU	Western Europe	1957----	spring type	500	5.74	3.5	SAMEA118760819
GB2_13092	TRI 6210	IRN	Southern Asia	1959----	spring type	300	5.74	8.07	SAMEA118760820
GB2_13093	TRI 6209	IRN	Southern Asia	1959----	spring type	300	28.32	6.36	SAMEA118760821
GB2_13094	TRI 6208	IRN	Southern Asia	1959----	spring type	300	7.74	2.93	SAMEA118760822
GB2_13095	TRI 6206	IRN	Southern Asia	1959----	spring type	300	6.24	5.36	SAMEA118760823
GB2_13096	TRI 6205	IRN	Southern Asia	1959----	spring type	300	5.74	4.64	SAMEA118760824
GB2_13097	TRI 6204	IRN	Southern Asia	1959----	spring type	300	5.74	3.07	SAMEA118760825
GB2_13098	TRI 6203	IRN	Southern Asia	1959----	spring type	300	5.74	2.93	SAMEA118760826
GB2_13099	TRI 6200	IRN	Southern Asia	1959----	spring type	300	19.77	4.26	SAMEA118760827
GB2_13100	TRI 6199	IRN	Southern Asia	1959----	spring type	300	25.62	5.09	SAMEA118760828
GB2_13101	TRI 6197	IRN	Southern Asia	1959----	spring type	300	12.05	2.93	SAMEA118760829
GB2_13102	TRI 6195	IRN	Southern Asia	1959----	spring type	300	6.48	3.21	SAMEA118760830
GB2_13103	TRI 6194	IRN	Southern Asia	1959----	spring type	300	15.2	3.59	SAMEA118760831
GB2_13104	TRI 6188	IRN	Southern Asia	1959----	spring type	300	7.98	3.79	SAMEA118760832
GB2_13105	TRI 6187	IRN	Southern Asia	1959----	spring type	300	20.77	11.51	SAMEA118760833
GB2_13106	TRI 6186	IRN	Southern Asia	1959----	spring type	300	12.77	1.08	SAMEA118760834
GB2_13107	TRI 6185	IRN	Southern Asia	1959----	spring type	300	25.2	5.82	SAMEA118760835
GB2_13108	TRI 5355	FIN	Northern Europe	1957----	spring type	500	31.48	3.36	SAMEA118760836
GB2_13109	TRI 6180	IRN	Southern Asia	1959----	spring type	300	23.2	7.22	SAMEA118760837
GB2_13110	TRI 6176	IRN	Southern Asia	1959----	spring type	300	25.31	4.39	SAMEA118760838
GB2_13111	TRI 8260	KEN	Eastern Africa	1966----	spring type	500	13.48	-0.28	SAMEA118760804
GB2_13112	TRI 8259	KEN	Eastern Africa	1966----	spring type	500	22.05	0.08	SAMEA118760839
GB2_13113	TRI 8257	KEN	Eastern Africa	1966----	spring type	500	8.62	-0.49	SAMEA118760840
GB2_13114	TRI 8253	KEN	Eastern Africa	1966----	spring type	500	13.2	2.93	SAMEA118760841
GB2_13115	TRI 8252	KEN	Eastern Africa	1966----	spring type	500	7.2	0.79	SAMEA118760842
GB2_13116	TRI 8250	KEN	Eastern Africa	1966----	spring type	500	17.91	5.51	SAMEA118760843
GB2_13117	TRI 8248	KEN	Eastern Africa	1966----	spring type	500	8.48	2.89	SAMEA118760844
GB2_13118	TRI 8247	KEN	Eastern Africa	1966----	spring type	500	13.91	2.22	SAMEA118760845
GB2_13119	TRI 8245	KEN	Eastern Africa	1966----	spring type	500	14.84	1.72	SAMEA118760846
GB2_13120	TRI 8244	KEN	Eastern Africa	1966----	spring type	500	8.48	2.79	SAMEA118760847
GB2_13121	TRI 8243	MEX	Central America	1966----	spring type	500	22.27	-0.21	SAMEA118760848
GB2_13122	TRI 8242	MEX	Central America	1966----	spring type	500	17.84	-1.78	SAMEA118760849
GB2_13123	TRI 8241	MEX	Central America	1966----	spring type	500	8.15	-1.35	SAMEA118760850
GB2_13124	TRI 8238	ZAF	Southern Africa	1966----	spring type	500	7.65	-1.78	SAMEA118760851
GB2_13125	TRI 8237	COL	South America	1966----	spring type	500	9.13	3.99	SAMEA118760852
GB2_13126	TRI 8236	KEN	Eastern Africa	1966----	spring type	500	9.41	2.7	SAMEA118760853
GB2_13127	TRI 8235	USA	Northern America	1966----	spring type	500	8.13	0.7	SAMEA118760854
GB2_13128	TRI 8234	MEX	Central America	1966----	spring type	500	7.15	3.28	SAMEA118760855
GB2_13129	TRI 8233	NA	NA	1966----	spring type	500	14.98	9.7	SAMEA118760856
GB2_13130	TRI 8232	MEX	Central America	1966----	spring type	500	6.98	1.32	SAMEA118760857
GB2_13131	TRI 8230	USA	Northern America	1966----	spring type	500	6.98	-0.3	SAMEA118760858
GB2_13132	TRI 8229	CAN	Northern America	1966----	spring type	500	8.41	-0.84	SAMEA118760859
GB2_13133	TRI 8228	MEX	Central America	1966----	spring type	500	15.98	-2.01	SAMEA118760860
GB2_13134	TRI 8227	MEX	Central America	1966----	spring type	500	12.55	0.82	SAMEA118760861
GB2_13135	TRI 8226	KEN	Eastern Africa	1966----	spring type	500	8.41	-1.72	SAMEA118760862
GB2_13136	TRI 8224	KEN	Eastern Africa	1966----	spring type	500	10.41	3.56	SAMEA118760863
GB2_13137	TRI 8213	KEN	Eastern Africa	1966----	spring type	500	7.15	1.66	SAMEA118760864
GB2_13138	TRI 8207	MEX	Central America	1966----	spring type	500	8.65	3.28	SAMEA118760865
GB2_13139	TRI 8206	COL	South America	1966----	spring type	500	4.86	-2.01	SAMEA118760866
GB2_13140	TRI 8196	MEX	Central America	1966----	spring type	500	4.52	1.16	SAMEA118760867
GB2_13141	TRI 8200	COL	South America	1966----	spring type	500	5.62	-2.01	SAMEA118760868
GB2_13143	TRI 7201	JPN	Eastern Asia	1964----	spring type	500	4.52	2.99	SAMEA118760869
GB2_13144	TRI 7202	JPN	Eastern Asia	1964----	spring type	500	4.88	0.7	SAMEA118760870
GB2_13145	TRI 8186	ITA	Southern Europe	1966----	spring type	500	5.86	4.28	SAMEA118760871
GB2_13146	TRI 8184	PAK	Southern Asia	1966----	spring type	500	12.17	1.53	SAMEA118760872
GB2_13147	TRI 8182	PAK	Southern Asia	1966----	spring type	500	5.82	3.19	SAMEA118760873
GB2_13148	TRI 8181	PAK	Southern Asia	1966----	spring type	500	8.31	2.48	SAMEA118760874
GB2_13149	TRI 8180	PAK	Southern Asia	1966----	spring type	500	11.45	1.36	SAMEA118760875
GB2_13150	TRI 8179	PAK	Southern Asia	1966----	spring type	500	5.69	3.86	SAMEA118760876
GB2_13151	TRI 8178	PAK	Southern Asia	1966----	spring type	500	13.02	1.76	SAMEA118760877
GB2_13152	TRI 8176	BGR	Eastern Europe	1966----	spring type	500	5.31	1.53	SAMEA118760878
GB2_13153	TRI 7571	AUS	Australia and New Zealand	1966----	spring type	500	17.02	3.36	SAMEA118760879
GB2_13154	TRI 7570	AUS	Australia and New Zealand	1966----	spring type	500	12.88	3.19	SAMEA118760880
GB2_13155	TRI 7568	AUS	Australia and New Zealand	1966----	spring type	500	32.45	3.76	SAMEA118760881
GB2_13156	TRI 7566	ARG	South America	1966----	spring type	500	5.19	-0.81	SAMEA118760882
GB2_13157	TRI 7565	ARG	South America	1966----	spring type	500	7.31	-0.81	NA
GB2_13158	TRI 7561	ESP	Southern Europe	1966----	spring type	500	12.31	13.62	SAMEA118760883
GB2_13159	TRI 7551	PRT	Southern Europe	1966----	spring type	500	38.74	4.76	SAMEA118760884
GB2_13160	TRI 7549	NA	NA	1966----	spring type	500	3.65	10.91	SAMEA118760885
GB2_13161	TRI 7547	MEX	Central America	1966----	spring type	500	12.44	1.53	SAMEA118760886
GB2_13162	TRI 7546	MEX	Central America	1966----	spring type	500	7.99	4.48	SAMEA118760887
GB2_13163	TRI 7543	MEX	Central America	1966----	spring type	500	4.49	4.62	SAMEA118760888
GB2_13164	TRI 7542	MEX	Central America	1966----	spring type	500	7.58	0.34	SAMEA118760889
GB2_13165	TRI 7540	MEX	Central America	1966----	spring type	500	13.58	3.76	SAMEA118760890
GB2_13166	TRI 7537	MEX	Central America	1966----	spring type	500	5.44	3.7	SAMEA118760891
GB2_13167	TRI 7535	ARG	South America	1966----	spring type	500	3.72	-0.92	SAMEA118760892
GB2_13168	TRI 7529	ARG	South America	1966----	spring type	500	5.44	4.91	SAMEA118760893
GB2_13169	TRI 7528	ARG	South America	1966----	spring type	500	20.3	-0.92	SAMEA118760894
GB2_13170	TRI 7527	ARG	South America	1966----	spring type	500	5.72	2.24	SAMEA118760895
GB2_13171	TRI 7526	ARG	South America	1966----	spring type	500	15.58	7.51	SAMEA118760897
GB2_13172	TRI 7521	ARG	South America	1966----	spring type	500	4.15	3.93	SAMEA118760898
GB2_13173	TRI 7520	ARG	South America	1966----	spring type	500	10.01	-0.92	SAMEA118760899
GB2_13174	TRI 7517	ARG	South America	1966----	spring type	500	3.32	2.65	SAMEA118760900
GB2_13175	TRI 7510	ARG	South America	1966----	spring type	500	3.72	-0.64	SAMEA118760901
GB2_13176	TRI 7508	ARG	South America	1966----	spring type	500	9.72	3.65	SAMEA118760902
GB2_13177	TRI 7506	ARG	South America	1966----	spring type	500	10.44	-0.92	SAMEA118760903
GB2_13178	TRI 7500	PRT	Southern Europe	1966----	spring type	500	5.15	3.79	SAMEA118760904
GB2_13179	TRI 7498	PRT	Southern Europe	1966----	spring type	500	9.44	2.28	SAMEA118760905
GB2_13180	TRI 7496	PRT	Southern Europe	1966----	spring type	300	13.95	1.74	SAMEA118760906
GB2_13181	TRI 7494	CAN	Northern America	1965----	spring type	500	7.8	-0.92	SAMEA118760907
GB2_13182	TRI 5661	IRN	Southern Asia	1960----	spring type	300	12.23	8.65	SAMEA118760908
GB2_13183	TRI 5662	IRN	Southern Asia	1959----	spring type	300	8.3	5.08	SAMEA118760909
GB2_13184	TRI 5666	IRN	Southern Asia	1959----	spring type	300	12.52	1.28	SAMEA118760910
GB2_13185	TRI 7308	ETH	Eastern Africa	1963----	spring type	300	10.95	4.08	SAMEA118760911
GB2_13230	TRI 7126	TUN	Northern Africa	1963----	spring type	500	1	3.35	SAMEA118760951
GB2_13231	TRI 7116	IRN	Southern Asia	1962----	spring type	300	6.5	3.78	SAMEA118760952
GB2_13232	TRI 7113	ITA	Southern Europe	1962----	spring type	500	2.83	5.78	SAMEA118760953
GB2_13233	TRI 7005	FRA	Western Europe	1962----	spring type	500	10.29	1.35	SAMEA118760954
GB2_13234	TRI 7000	BLR	Eastern Europe	1960----	spring type	500	0.5	8.5	SAMEA118760955
GB2_13235	TRI 6996	FRA	Western Europe	1962----	spring type	500	0.17	2.52	SAMEA118760956
GB2_13237	TRI 6991	FRA	Western Europe	1962----	spring type	500	3.43	3.78	SAMEA118760958
GB2_13238	TRI 6223	IRN	Southern Asia	1959----	spring type	300	0	4.21	SAMEA118760959
GB2_13239	TRI 6244	IRN	Southern Asia	1959----	spring type	300	0	4.21	SAMEA118760960
GB2_13241	TRI 6257	IRN	Southern Asia	1959----	spring type	300	0.17	4.02	SAMEA118760961
GB2_13242	TRI 6256	IRN	Southern Asia	1959----	spring type	300	2.33	3.69	SAMEA118760962
GB2_13243	TRI 6262	IRN	Southern Asia	1959----	spring type	300	4.17	5.5	SAMEA118760963
GB2_13244	TRI 5826	IRN	Southern Asia	1959----	spring type	300	0	3.52	SAMEA118760964
GB2_13245	TRI 5827	IRN	Southern Asia	1959----	spring type	300	-1.57	6.07	SAMEA118760965
GB2_13246	TRI 5828	IRN	Southern Asia	1959----	spring type	300	-8.57	5.78	SAMEA118760966
GB2_13247	TRI 6238	IRN	Southern Asia	1959----	spring type	300	-1.85	1.07	SAMEA118760967
GB2_13248	TRI 6234	IRN	Southern Asia	1959----	spring type	300	-8.28	1.64	SAMEA118760968
GB2_13249	TRI 6232	IRN	Southern Asia	1959----	spring type	300	14.29	1.5	SAMEA118760969
GB2_13250	TRI 6222	IRN	Southern Asia	1959----	spring type	300	-8.57	2.35	SAMEA118760970
GB2_13251	TRI 6221	IRN	Southern Asia	1959----	spring type	300	-5.28	6.78	SAMEA118760971
GB2_13252	TRI 6239	IRN	Southern Asia	1959----	spring type	300	3.29	7.47	SAMEA118760972
GB2_13253	TRI 6268	IRN	Southern Asia	1959----	spring type	300	11.43	5.04	SAMEA118760973
GB2_13254	TRI 6273	IRN	Southern Asia	1959----	spring type	300	10.72	3.94	SAMEA118760974
GB2_13255	TRI 6277	IRN	Southern Asia	1959----	spring type	300	23.29	3.94	SAMEA118760975
GB2_13256	TRI 6279	IRN	Southern Asia	1959----	spring type	300	8.43	4.04	SAMEA118760976
GB2_13257	TRI 6297	IRN	Southern Asia	1959----	spring type	300	7.72	4.28	SAMEA118760977
GB2_13258	TRI 6296	IRN	Southern Asia	1959----	spring type	300	4.15	3.28	SAMEA118760978
GB2_13259	TRI 6294	IRN	Southern Asia	1959----	spring type	300	13.57	7.11	SAMEA118760979
GB2_13260	TRI 5855	IRN	Southern Asia	1959----	spring type	300	2.72	5.75	SAMEA118760980
GB2_13261	TRI 6286	IRN	Southern Asia	1959----	spring type	300	19.86	8.33	SAMEA118760981
GB2_13262	TRI 6282	IRN	Southern Asia	1959----	spring type	300	29	9.9	SAMEA118760982
GB2_13263	TRI 6280	IRN	Southern Asia	1959----	spring type	300	9.43	7.04	SAMEA118760983
GB2_13264	TRI 6981	FRA	Western Europe	1962----	spring type	500	7.29	4.33	SAMEA118760984
GB2_13266	TRI 6972	FRA	Western Europe	1962----	spring type	500	14.88	6.18	SAMEA118760985
GB2_13267	TRI 6326	DEU	Western Europe	1961----	spring type	500	-1.46	3.47	SAMEA118760986
GB2_13268	TRI 6322	BGD	Southern Asia	1961----	spring type	500	15.88	5.18	SAMEA118760987
GB2_13269	TRI 6319	POL	Eastern Europe	1956----	spring type	500	3.16	2.61	SAMEA118760988
GB2_13270	TRI 6315	CHN	Eastern Asia	1956----	spring type	100	-4.46	2.18	SAMEA118760989
GB2_13271	TRI 6309	CHN	Eastern Asia	1957----	spring type	300	-1.79	5.93	SAMEA118760990
GB2_13272	TRI 6308	CHN	Eastern Asia	1957----	spring type	300	18.16	4.65	SAMEA118760991
GB2_13273	TRI 8465	ITA	Southern Europe	1968----	spring type	500	6.31	4.82	SAMEA118760992
GB2_13274	TRI 8464	ITA	Southern Europe	1968----	spring type	500	3.88	11.22	SAMEA118760993
GB2_13275	TRI 8462	ITA	Southern Europe	1968----	spring type	500	1.45	14.65	SAMEA118760994
GB2_13276	TRI 8460	ITA	Southern Europe	1968----	spring type	500	-2.96	13.22	SAMEA118760995
GB2_13277	TRI 8459	ITA	Southern Europe	1968----	spring type	500	1.59	6.98	SAMEA118760996
GB2_13278	TRI 8440	ETH	Eastern Africa	1968----	spring type	100	7.21	4.98	SAMEA118760997
GB2_13279	TRI 8431	IND	Southern Asia	1968----	spring type	500	21.88	7.79	SAMEA118760998
GB2_13280	TRI 8606	AUT	Western Europe	1966----	spring type	300	12.59	9.93	SAMEA118760999
GB2_13281	TRI 8605	AUT	Western Europe	1966----	spring type	300	22.38	7.36	SAMEA118761000
GB2_13282	TRI 8604	AUT	Western Europe	1966----	spring type	300	1.88	6.22	SAMEA118761001
GB2_13283	TRI 8601	AUT	Western Europe	1966----	spring type	300	-4.96	9.93	SAMEA118761002
GB2_13284	TRI 8599	AUT	Western Europe	1966----	spring type	300	7.02	8.22	SAMEA118761003
GB2_13285	TRI 8593	AUT	Western Europe	1966----	spring type	300	0.67	3.08	SAMEA118761004
GB2_13286	TRI 8590	AUT	Western Europe	1966----	spring type	300	1.14	2.32	SAMEA118761005
GB2_13288	TRI 8577	AUT	Western Europe	1966----	spring type	300	5.29	3.32	SAMEA118761006
GB2_13289	TRI 8575	AUT	Western Europe	1966----	spring type	300	0.33	8.51	SAMEA118761007
GB2_13290	TRI 8561	AUT	Western Europe	1966----	spring type	300	1.14	9.79	SAMEA118761008
GB2_13291	TRI 8559	AUT	Western Europe	1966----	spring type	300	0	9.93	SAMEA118761009
GB2_13292	TRI 8220	KEN	Eastern Africa	1966----	spring type	500	1.14	4.69	SAMEA118761010
GB2_13293	TRI 6027	IRN	Southern Asia	1959----	spring type	300	28	5.09	SAMEA118761011
GB2_13294	TRI 4016	ITA	Southern Europe	1952----	spring type	300	29	8.69	SAMEA118761012
GB2_13295	TRI 4018	ITA	Southern Europe	1951----	spring type	300	0.57	6.03	SAMEA118761013
GB2_13296	TRI 6069	IRN	Southern Asia	1959----	spring type	300	0.57	3.32	SAMEA118761014
GB2_13297	TRI 6067	IRN	Southern Asia	1959----	spring type	300	1.86	3.09	SAMEA118761015
GB2_13298	TRI 6066	IRN	Southern Asia	1959----	spring type	300	3.5	4.22	SAMEA118761016
GB2_13337	TRI 12383	IND	Southern Asia	1980----	spring type	300	3.72	6.96	SAMEA118761032
GB2_13402	TRI 12502	IND	Southern Asia	1980----	spring type	300	12.26	6.25	SAMEA118761096
GB2_13432	TRI 12539	IND	Southern Asia	1980----	spring type	300	1.29	6.6	SAMEA118761125
GB2_13435	TRI 12543	IND	Southern Asia	1980----	spring type	300	-4.88	5.18	SAMEA118761128
GB2_13474	TRI 12591	IND	Southern Asia	1979----	spring type	300	0.26	2.96	SAMEA118761168
GB2_13476	TRI 12593	IND	Southern Asia	1980----	spring type	300	7.12	4.89	SAMEA118761170
GB2_13483	TRI 11150	NPL	Southern Asia	1975----	spring type	300	10.45	6.91	SAMEA118761177
GB2_13487	TRI 11306	CZE	Eastern Europe	1975----	spring type	300	11.95	6.12	SAMEA118761181
GB2_13489	TRI 11308	CZE	Eastern Europe	1975----	spring type	300	3.98	5.91	SAMEA118761183
GB2_13538	TRI 11433	MEX	Central America	1976----	spring type	300	4.37	1.41	SAMEA118761231
GB2_13540	TRI 11435	PER	South America	1976----	spring type	500	9.32	5.14	SAMEA118761233
GB2_13541	TRI 11436	NA	NA	1976----	spring type	500	5.15	4.79	SAMEA118761234
GB2_13542	TRI 11452	NA	NA	1976----	spring type	500	4.27	2.07	SAMEA118761235
GB2_13543	TRI 11453	NA	NA	1976----	spring type	500	3.7	2.07	SAMEA118761236
GB2_13544	TRI 11454	NA	NA	1976----	spring type	400	3.7	2.64	SAMEA118761237
GB2_13545	TRI 11479	NA	NA	1976----	spring type	500	4.65	4	SAMEA118761238
GB2_13546	TRI 11480	DEU	Western Europe	1976----	spring type	400	7.27	3.43	SAMEA118761239
GB2_13547	TRI 11481	NA	NA	1976----	spring type	500	0.27	-0.21	SAMEA118761240
GB2_13548	TRI 11482	NA	NA	1976----	spring type	500	6.65	5.14	SAMEA118761241
GB2_13549	TRI 11483	NA	NA	1976----	spring type	400	9.55	5.79	SAMEA118761242
GB2_13550	TRI 11484	DEU	Western Europe	1976----	spring type	500	11.32	8.1	SAMEA118761243
GB2_13551	TRI 11486	DEU	Western Europe	1976----	spring type	400	6.98	6.64	SAMEA118761244
GB2_13552	TRI 11487	NA	NA	1976----	spring type	500	6.55	5.43	SAMEA118761246
GB2_13553	TRI 11518	NA	NA	1976----	spring type	500	2.15	1.57	SAMEA118761247
GB2_13554	TRI 11519	NA	NA	1976----	spring type	400	3.48	4	SAMEA118761248
GB2_13555	TRI 11520	NA	NA	1976----	spring type	400	4.32	4.43	SAMEA118761249
GB2_13556	TRI 11521	NA	NA	1976----	spring type	400	4.98	3.22	SAMEA118761250
GB2_13557	TRI 11522	NA	NA	1976----	spring type	400	12.12	7.79	SAMEA118761251
GB2_13558	TRI 11524	NA	NA	1976----	spring type	500	7.15	5.93	SAMEA118761252
GB2_13559	TRI 11526	POL	Eastern Europe	1976----	spring type	300	9.27	7.86	SAMEA118761253
GB2_13560	TRI 11528	IRQ	Western Asia	1976----	spring type	300	8.95	5.35	SAMEA118761254
GB2_13561	TRI 11529	IRQ	Western Asia	1976----	spring type	300	7.26	5.71	SAMEA118761255
GB2_13562	TRI 11530	IRQ	Western Asia	1976----	spring type	300	9.42	6.71	SAMEA118761256
GB2_13563	TRI 11531	IRQ	Western Asia	1976----	spring type	300	4.76	2.71	SAMEA118761257
GB2_13564	TRI 11538	IRQ	Western Asia	1976----	spring type	300	6.38	3.21	SAMEA118761258
GB2_13565	TRI 11541	IRQ	Western Asia	1976----	spring type	300	22.09	11.28	SAMEA118761259
GB2_13566	TRI 11545	IRQ	Western Asia	1976----	spring type	300	4.52	2.71	SAMEA118761260
GB2_13567	TRI 11548	IRQ	Western Asia	1976----	spring type	300	7.38	5.78	SAMEA118761261
GB2_13568	TRI 10778	GRC	Southern Europe	1974----	spring type	100	5.23	4.64	SAMEA118761262
GB2_13569	TRI 10780	GRC	Southern Europe	1974----	spring type	100	16.52	9.06	SAMEA118761263
GB2_13570	TRI 10782	GRC	Southern Europe	1974----	spring type	100	16.42	12.59	SAMEA118761264
GB2_13571	TRI 10785	GRC	Southern Europe	1974----	spring type	100	11.66	8.71	SAMEA118761265
GB2_13572	TRI 10786	GRC	Southern Europe	1974----	spring type	100	16.23	11.64	SAMEA118761266
GB2_13573	TRI 10797	GRC	Southern Europe	1974----	spring type	100	7.09	5.71	SAMEA118761267
GB2_13574	TRI 10798	GRC	Southern Europe	1974----	spring type	100	11.42	6.14	SAMEA118761268
GB2_13575	TRI 10820	GRC	Southern Europe	1974----	spring type	100	0.09	1.35	SAMEA118761269
GB2_13576	TRI 10821	GRC	Southern Europe	1974----	spring type	100	5.23	3.49	SAMEA118761270
GB2_13577	TRI 10822	GRC	Southern Europe	1974----	spring type	100	10.79	8.7	SAMEA118761271
GB2_13578	TRI 10823	GRC	Southern Europe	1974----	spring type	100	11.95	7.04	SAMEA118761272
GB2_13579	TRI 10827	GRC	Southern Europe	1974----	spring type	100	0.42	0.56	SAMEA118761273
GB2_13580	TRI 10875	NPL	Southern Asia	1973----	spring type	300	13.23	8.3	SAMEA118761274
GB2_13584	TRI 10974	BRA	South America	1973----	spring type	500	7.26	7.55	SAMEA118761278
GB2_13588	TRI 10979	FRA	Western Europe	1973----	spring type	500	-2.13	2.41	SAMEA118761282
GB2_13589	TRI 10980	FRA	Western Europe	1973----	spring type	500	0.98	5.48	SAMEA118761283
GB2_13611	TRI 11326	NA	NA	1975----	spring type	400	-0.74	4.05	SAMEA118761305
GB2_13634	TRI 11060	RUS	Eastern Europe	1974----	spring type	500	0.29	1.55	SAMEA118761328
GB2_13646	TRI 11093	AUS	Australia and New Zealand	1974----	spring type	500	-0.71	3.2	SAMEA118761340
GB2_13647	TRI 11094	AUS	Australia and New Zealand	1974----	spring type	500	6.92	3.55	SAMEA118761341
GB2_13648	TRI 11095	AUS	Australia and New Zealand	1974----	spring type	500	-3.45	1.62	SAMEA118761342
GB2_13679	TRI 12235	IND	Southern Asia	1980----	spring type	300	-2.59	2.48	SAMEA118761373
GB2_13685	TRI 12189	IND	Southern Asia	1980----	spring type	300	7.89	5.7	SAMEA118761379
GB2_13686	TRI 12190	IND	Southern Asia	1979----	spring type	300	2.61	3.12	SAMEA118761380
GB2_13687	TRI 12191	IND	Southern Asia	1979----	spring type	300	-0.82	3.12	SAMEA118761381
GB2_13699	TRI 12207	IND	Southern Asia	1980----	spring type	300	0.77	3.55	SAMEA118761393
GB2_13754	TRI 12292	IND	Southern Asia	1979----	spring type	300	14.04	3.55	SAMEA118761447
GB2_13757	TRI 12609	IND	Southern Asia	1979----	spring type	300	16.18	2.41	SAMEA118761450
GB2_13759	TRI 12135	IND	Southern Asia	1980----	spring type	300	-3.39	5.75	SAMEA118761452
GB2_13764	TRI 12614	IND	Southern Asia	1980----	spring type	300	1.89	2.11	SAMEA118761457
GB2_13775	TRI 11103	NA	NA	1974----	spring type	500	0.27	5.11	SAMEA118761468
GB2_13794	TRI 12648	IND	Southern Asia	1980----	spring type	300	3.32	3.18	SAMEA118761487
GB2_13796	TRI 12650	IND	Southern Asia	1979----	spring type	300	5.32	7.47	SAMEA118761489
GB2_13797	TRI 12651	IND	Southern Asia	1980----	spring type	300	6.18	8.25	SAMEA118761490
GB2_13801	TRI 12655	IND	Southern Asia	1980----	spring type	300	17.61	5.54	SAMEA118761494
GB2_13805	TRI 12660	IND	Southern Asia	1979----	spring type	300	3.32	6.11	SAMEA118761498
GB2_13806	TRI 12661	IND	Southern Asia	1980----	spring type	300	4.89	7.97	SAMEA118761499
GB2_13810	TRI 12667	IND	Southern Asia	1980----	spring type	300	-2.56	5.61	SAMEA118761503
GB2_13813	TRI 12670	IND	Southern Asia	1980----	spring type	300	8.18	6.25	SAMEA118761506
GB2_13814	TRI 12672	IND	Southern Asia	1980----	spring type	300	10.18	7.68	SAMEA118761507
GB2_13818	TRI 12629	IND	Southern Asia	1979----	spring type	300	-0.68	4.68	SAMEA118761511
GB2_13821	TRI 12679	IND	Southern Asia	1980----	spring type	300	1.18	4.82	SAMEA118761514
GB2_13824	TRI 12682	IND	Southern Asia	1980----	spring type	300	4.97	7.18	SAMEA118761517
GB2_13831	TRI 10994	FRA	Western Europe	1973----	spring type	500	1.02	7.19	SAMEA118761524
GB2_13832	TRI 10995	IND	Southern Asia	1973----	spring type	500	6.68	4.89	SAMEA118761525
GB2_13834	TRI 12736	RUS	Eastern Europe	1978----	spring type	500	0.85	6.75	SAMEA118761527
GB2_13840	TRI 12838	NA	NA	1979----	spring type	500	0.88	7.75	SAMEA118761533
GB2_13854	TRI 12877	ESP	Southern Europe	1979----	spring type	300	10.4	9.61	SAMEA118761547
GB2_13857	TRI 12886	ESP	Southern Europe	1979----	spring type	300	7.68	2.72	SAMEA118761550
GB2_13865	TRI 12896	NA	NA	1979----	spring type	400	18.48	2.07	SAMEA118761558
GB2_13890	TRI 13125	CHN	Eastern Asia	1981----	spring type	500	6.26	5.64	SAMEA118761583
GB2_13902	TRI 13172	NA	NA	1982----	spring type	400	13.11	2.64	SAMEA118761595
GB2_13906	TRI 13176	NA	NA	1982----	spring type	400	23.68	3.07	SAMEA118761599
GB2_13913	TRI 13183	NA	NA	1982----	spring type	400	10.85	3.14	SAMEA118761606
GB2_13919	TRI 11655	PAK	Southern Asia	1979----	spring type	NA	15.08	3.5	SAMEA118761612
GB2_13928	TRI 12678	IND	Southern Asia	1980----	spring type	300	6.4	5.43	SAMEA118761621
GB2_13946	TRI 11918	MEX	Central America	1977----	spring type	500	10.52	10.79	SAMEA118761639
GB2_13949	TRI 11932	CZE	Eastern Europe	1977----	spring type	300	8.48	6.75	SAMEA118761642
GB2_13950	TRI 11933	NA	NA	1977----	spring type	300	8.4	4.22	SAMEA118761643
GB2_13954	TRI 11979	NA	NA	1978----	spring type	500	3.11	5.79	SAMEA118761647
GB2_13955	TRI 11980	NA	NA	1978----	spring type	500	7.35	5.57	SAMEA118761648
GB2_13956	TRI 11981	NA	NA	1978----	spring type	500	1.06	3.5	SAMEA118761649
GB2_13970	TRI 12108	IND	Southern Asia	1980----	spring type	300	5.81	3.29	SAMEA118761663
GB2_13971	TRI 12109	IND	Southern Asia	1980----	spring type	300	11.5	6.93	SAMEA118761664
GB2_13972	TRI 11759	CHL	South America	1977----	spring type	400	18.5	4.22	SAMEA118761665
GB2_13973	TRI 11758	CHL	South America	1977----	spring type	400	14.52	4.79	SAMEA118761666
GB2_13974	TRI 11757	CHL	South America	1977----	spring type	300	18.21	2.93	SAMEA118761667
GB2_13975	TRI 12117	IND	Southern Asia	1979----	spring type	300	17.64	3.14	SAMEA118761668
GB2_13976	TRI 12118	IND	Southern Asia	1980----	spring type	300	7.14	2.87	SAMEA118761669
GB2_13977	TRI 12119	IND	Southern Asia	1980----	spring type	300	10.79	3.3	SAMEA118761670
GB2_13978	TRI 12120	IND	Southern Asia	1979----	spring type	300	2.14	3.02	SAMEA118761671
GB2_13979	TRI 12121	IND	Southern Asia	1980----	spring type	300	3.81	2.3	SAMEA118761672
GB2_13980	TRI 12122	IND	Southern Asia	1980----	spring type	300	15.64	3.09	SAMEA118761673
GB2_13981	TRI 10262	USA	Northern America	1972----	spring type	500	17.14	4.02	SAMEA118761674
GB2_13982	TRI 10263	USA	Northern America	1972----	spring type	500	11.21	2.37	SAMEA118761675
GB2_13983	TRI 10264	USA	Northern America	1972----	spring type	500	18.5	2.59	SAMEA118761676
GB2_13984	TRI 11392	RUS	Eastern Europe	1976----	spring type	500	6.21	2.09	SAMEA118761677
GB2_13985	TRI 11391	RUS	Eastern Europe	1976----	spring type	500	0.5	3.23	SAMEA118761678
GB2_13986	TRI 11390	RUS	Eastern Europe	1976----	spring type	500	9.98	3.3	SAMEA118761679
GB2_13987	TRI 12136	IND	Southern Asia	1980----	spring type	300	31.14	2.09	SAMEA118761680
GB2_13988	TRI 12137	IND	Southern Asia	1980----	spring type	300	13.07	3.73	SAMEA118761681
GB2_13989	TRI 12138	IND	Southern Asia	1979----	spring type	300	21.79	3.8	SAMEA118761682
GB2_13990	TRI 12142	IND	Southern Asia	1980----	spring type	300	14.82	4.16	SAMEA118761683
GB2_13991	TRI 12143	IND	Southern Asia	1980----	spring type	300	12.82	6.02	SAMEA118761684
GB2_13992	TRI 12144	IND	Southern Asia	1980----	spring type	300	6.82	8.94	SAMEA118761685
GB2_13993	TRI 12145	IND	Southern Asia	1980----	spring type	300	10.37	5.79	SAMEA118761686
GB2_13994	TRI 12147	IND	Southern Asia	1980----	spring type	300	12.25	5.78	SAMEA118761687
GB2_13995	TRI 12148	IND	Southern Asia	1980----	spring type	300	9.11	6.23	SAMEA118761688
GB2_13996	TRI 12149	IND	Southern Asia	1979----	spring type	300	10.7	8.21	SAMEA118761689
GB2_13997	TRI 12150	IND	Southern Asia	1980----	spring type	300	13.25	6.43	SAMEA118761690
GB2_13998	TRI 12151	IND	Southern Asia	1980----	spring type	300	9.39	7.28	SAMEA118761691
GB2_14000	TRI 12153	IND	Southern Asia	1980----	spring type	300	10.11	6.93	SAMEA118761693
GB2_14001	TRI 12154	IND	Southern Asia	1980----	spring type	300	8.82	4.76	SAMEA118761694
GB2_14002	TRI 9991	PAK	Southern Asia	1972----	spring type	500	7.39	5.78	SAMEA118761695
GB2_14003	TRI 9992	PAK	Southern Asia	1972----	spring type	500	6.2	7.2	SAMEA118761696
GB2_14004	TRI 9994	JPN	Eastern Asia	1972----	spring type	500	9.68	5.5	SAMEA118761697
GB2_14005	TRI 10000	PAK	Southern Asia	1972----	spring type	500	16.2	3.93	SAMEA118761698
GB2_14006	TRI 10001	PAK	Southern Asia	1972----	spring type	500	11.96	6.57	SAMEA118761699
GB2_14007	TRI 10002	PAK	Southern Asia	1972----	spring type	500	16.25	9.43	SAMEA118761700
GB2_14008	TRI 10004	AUS	Australia and New Zealand	1972----	spring type	500	10.96	9.5	SAMEA118761701
GB2_14009	TRI 10005	TUR	Western Asia	1972----	spring type	500	9.39	4.57	SAMEA118761702
GB2_14010	TRI 10006	AFG	Southern Asia	1972----	spring type	300	16.53	4.36	SAMEA118761703
GB2_14011	TRI 10007	CHL	South America	1972----	spring type	100	12.18	3.71	SAMEA118761704
GB2_14012	TRI 10008	CHL	South America	1972----	spring type	100	11.87	7.28	SAMEA118761705
GB2_14013	TRI 10010	CHL	South America	1972----	spring type	100	10.01	7.93	SAMEA118761706
GB2_14014	TRI 10011	CHL	South America	1972----	spring type	100	15.01	8.14	SAMEA118761707
GB2_14015	TRI 10012	CHL	South America	1972----	spring type	100	12.18	5.57	SAMEA118761708
GB2_14016	TRI 10013	CHL	South America	1972----	spring type	100	4.01	1	SAMEA118761616
GB2_14017	TRI 10014	CHL	South America	1972----	spring type	100	17.3	11.47	SAMEA118761709
GB2_14018	TRI 10015	CHL	South America	1972----	spring type	100	17.68	7.22	SAMEA118761710
GB2_14019	TRI 10016	CHL	South America	1972----	spring type	100	9.84	5.07	SAMEA118761711
GB2_14020	TRI 10017	PAK	Southern Asia	1972----	spring type	300	8.72	5.36	SAMEA118761712
GB2_14021	TRI 10018	TUR	Western Asia	1972----	spring type	300	23.18	4.07	SAMEA118761713
GB2_14022	TRI 10019	TUR	Western Asia	1972----	spring type	300	10.01	9.86	SAMEA118761714
GB2_14024	TRI 10024	RUS	Eastern Europe	1972----	spring type	100	10.72	3.64	SAMEA118761716
GB2_14025	TRI 10027	MEX	Central America	1972----	spring type	500	10.51	13.07	SAMEA118761717
GB2_14026	TRI 10028	MEX	Central America	1972----	spring type	500	22.58	8.64	SAMEA118761718
GB2_14027	TRI 10029	MEX	Central America	1972----	spring type	500	4.68	10.57	SAMEA118761719
GB2_14028	TRI 10030	MEX	Central America	1972----	spring type	500	5.51	9.64	SAMEA118761720
GB2_14029	TRI 10031	MEX	Central America	1972----	spring type	500	12.18	6.86	SAMEA118761721
GB2_14030	TRI 10032	MEX	Central America	1972----	spring type	500	9.44	5.36	SAMEA118761722
GB2_14031	TRI 10033	MEX	Central America	1972----	spring type	500	9.58	7.43	SAMEA118761723
GB2_14032	TRI 10034	MEX	Central America	1972----	spring type	500	1.58	3	SAMEA118761724
GB2_14033	TRI 10035	MEX	Central America	1972----	spring type	500	0.47	4.57	SAMEA118761725
GB2_14034	TRI 10036	MEX	Central America	1972----	spring type	500	2.47	5.43	SAMEA118761726
GB2_14035	TRI 10043	MEX	Central America	1972----	spring type	500	9.5	9	SAMEA118761727
GB2_14036	TRI 10044	MEX	Central America	1972----	spring type	500	10.62	5.86	SAMEA118761728
GB2_14037	TRI 10045	MEX	Central America	1972----	spring type	500	1.93	5.29	SAMEA118761729
GB2_14038	TRI 10046	MEX	Central America	1972----	spring type	500	2	5.51	SAMEA118761730
GB2_14040	TRI 10048	USA	Northern America	1972----	spring type	500	8.9	3.65	SAMEA118761732
GB2_14041	TRI 10052	NPL	Southern Asia	1972----	spring type	500	10.83	4.51	SAMEA118761733
GB2_14042	TRI 10053	USA	Northern America	1972----	spring type	500	12.19	2.08	SAMEA118761734
GB2_14043	TRI 10101	ROU	Eastern Europe	1972----	spring type	500	4.73	3.72	SAMEA118761735
GB2_14044	TRI 10104	SRB	Southern Europe	1972----	spring type	500	3.05	1.79	SAMEA118761736
GB2_14045	TRI 10105	RUS	Eastern Europe	1972----	spring type	500	2	1.87	SAMEA118761737
GB2_14046	TRI 10106	RUS	Eastern Europe	1972----	spring type	500	23	2.72	SAMEA118761738
GB2_14047	TRI 10108	RUS	Eastern Europe	1972----	spring type	500	6.33	2.29	SAMEA118761739
GB2_14048	TRI 10109	RUS	Eastern Europe	1972----	spring type	500	10.33	3.08	SAMEA118761740
GB2_14049	TRI 10110	RUS	Eastern Europe	1972----	spring type	500	-2.67	4.22	SAMEA118761741
GB2_14050	TRI 10111	RUS	Eastern Europe	1972----	spring type	500	6.62	3.94	SAMEA118761742
GB2_14051	TRI 10112	RUS	Eastern Europe	1972----	spring type	500	11.19	3.79	SAMEA118761743
GB2_14052	TRI 10116	RUS	Eastern Europe	1972----	spring type	500	9.83	3.01	SAMEA118761744
GB2_14053	TRI 10117	RUS	Eastern Europe	1972----	spring type	500	7.54	3.72	SAMEA118761745
GB2_14054	TRI 10118	RUS	Eastern Europe	1972----	spring type	500	3.47	4.29	SAMEA118761746
GB2_14055	TRI 10119	RUS	Eastern Europe	1972----	spring type	500	3.97	5.15	SAMEA118761747
GB2_14056	TRI 10174	DEU	Western Europe	1972----	spring type	500	4.83	6.08	SAMEA118761748
GB2_14057	TRI 9896	BGR	Eastern Europe	1971----	spring type	500	-0.03	0.79	SAMEA118761749
GB2_14058	TRI 9897	IND	Southern Asia	1971----	spring type	500	9.97	4.79	SAMEA118761750
GB2_14060	TRI 12439	IND	Southern Asia	1980----	spring type	300	2.97	6.42	SAMEA118761752
GB2_14061	TRI 12438	IND	Southern Asia	1980----	spring type	300	14.83	4.35	SAMEA118761753
GB2_14062	TRI 12436	IND	Southern Asia	1980----	spring type	300	8.57	3.64	SAMEA118761754
GB2_14063	TRI 10042	MEX	Central America	1972----	spring type	500	19.54	4.64	SAMEA118761755
GB2_14064	TRI 10275	RUS	Eastern Europe	1972----	spring type	500	9.69	4.14	SAMEA118761756
GB2_14065	TRI 10265	USA	Northern America	1972----	spring type	500	8.69	6.21	SAMEA118761757
GB2_14066	TRI 10277	ITA	Southern Europe	1972----	spring type	500	5.97	3.99	SAMEA118761758
GB2_14067	TRI 10293	PAK	Southern Asia	1972----	spring type	500	2.81	5.64	SAMEA118761759
GB2_14068	TRI 10292	ARG	South America	1972----	spring type	500	7.4	3.42	SAMEA118761760
GB2_14070	TRI 10296	MEX	Central America	1972----	spring type	500	7.69	6.49	SAMEA118761762
GB2_14071	TRI 10286	GBR	Northern Europe	1972----	spring type	500	4.4	7.57	SAMEA118761763
GB2_14072	TRI 10283	BGR	Eastern Europe	1972----	spring type	500	8.97	3.92	SAMEA118761764
GB2_14073	TRI 10303	ISR	Western Asia	1972----	spring type	500	7.83	5.99	SAMEA118761765
GB2_14074	TRI 10302	TUN	Northern Africa	1972----	spring type	500	9.54	5.49	SAMEA118761766
GB2_14075	TRI 10301	MEX	Central America	1972----	spring type	500	9.57	4.07	SAMEA118761767
GB2_14076	TRI 10300	MEX	Central America	1972----	spring type	500	18.72	4.99	SAMEA118761768
GB2_14077	TRI 10294	SYR	Western Asia	1972----	spring type	500	7.43	3.64	SAMEA118761769
GB2_14078	TRI 10295	SDN	Northern Africa	1972----	spring type	500	10.43	6.99	SAMEA118761770
GB2_14079	TRI 10299	IND	Southern Asia	1972----	spring type	500	8.15	1.64	SAMEA118761771
GB2_14080	TRI 10298	MEX	Central America	1972----	spring type	500	4.15	4.28	SAMEA118761772
GB2_14081	TRI 9561	IND	Southern Asia	1970----	spring type	500	2.48	4.18	SAMEA118761773
GB2_14082	TRI 9563	USA	Northern America	1970----	spring type	500	10.65	6.11	SAMEA118761774
GB2_14083	TRI 9564	USA	Northern America	1970----	spring type	500	7.81	6.61	SAMEA118761775
GB2_14084	TRI 9565	USA	Northern America	1970----	spring type	500	10.57	8.82	SAMEA118761776
GB2_14086	TRI 9572	CHL	South America	1970----	spring type	500	4	7.25	SAMEA118761778
GB2_14087	TRI 9573	CHL	South America	1970----	spring type	500	7	4.39	SAMEA118761779
GB2_14089	TRI 9682	BEL	Western Europe	1970----	spring type	500	13.98	6.25	SAMEA118761781
GB2_14090	TRI 9683	MEX	Central America	1970----	spring type	500	10.15	3.53	SAMEA118761782
GB2_14091	TRI 9684	AUS	Australia and New Zealand	1970----	spring type	500	18.48	1.46	SAMEA118761783
GB2_14092	TRI 9685	MEX	Central America	1970----	spring type	500	11.98	2.53	SAMEA118761784
GB2_14093	TRI 9686	ARG	South America	1970----	spring type	500	8.15	3.32	SAMEA118761785
GB2_14094	TRI 9687	MEX	Central America	1970----	spring type	500	14.65	6.53	SAMEA118761786
GB2_14097	TRI 9690	COL	South America	1970----	spring type	500	2.75	2.75	SAMEA118761789
GB2_14098	TRI 9691	BRA	South America	1970----	spring type	500	2.57	6.46	SAMEA118761790
GB2_14099	TRI 9692	IND	Southern Asia	1970----	spring type	500	11.66	7.25	SAMEA118761791
GB2_14100	TRI 9693	USA	Northern America	1970----	spring type	500	2.49	4.03	SAMEA118761792
GB2_14101	TRI 9694	CHL	South America	1970----	spring type	500	4.99	3.11	SAMEA118761793
GB2_14102	TRI 9696	TWN	Eastern Asia	1970----	spring type	500	10.35	2.61	SAMEA118761794
GB2_14103	TRI 9699	MEX	Central America	1970----	spring type	500	13.92	2.96	SAMEA118761795
GB2_14104	TRI 9700	MEX	Central America	1970----	spring type	500	10.16	6.1	SAMEA118761796
GB2_14105	TRI 9701	IND	Southern Asia	1970----	spring type	500	6.62	4.6	SAMEA118761797
GB2_14106	TRI 9702	USA	Northern America	1970----	spring type	500	2.92	4.03	SAMEA118761798
GB2_14107	TRI 9704	SDN	Northern Africa	1970----	spring type	500	6.62	7.74	SAMEA118761799
GB2_14108	TRI 9705	DEU	Western Europe	1970----	spring type	500	5.99	6.6	SAMEA118761800
GB2_14109	TRI 9707	CAN	Northern America	1970----	spring type	500	2.49	3.82	SAMEA118761801
GB2_14110	TRI 9708	IND	Southern Asia	1970----	spring type	500	2.66	5.67	SAMEA118761802
GB2_14111	TRI 9709	MEX	Central America	1970----	spring type	500	3.83	9.96	SAMEA118761803
GB2_14112	TRI 9710	USA	Northern America	1970----	spring type	500	2.69	4.53	SAMEA118761804
GB2_14113	TRI 9711	CHL	South America	1970----	spring type	500	3.16	2.17	SAMEA118761805
GB2_14114	TRI 9712	SDN	Northern Africa	1970----	spring type	500	14.07	6.82	SAMEA118761806
GB2_14115	TRI 9713	MEX	Central America	1970----	spring type	500	12.78	7.89	SAMEA118761807
GB2_14117	TRI 9715	MEX	Central America	1970----	spring type	500	2.92	7.53	SAMEA118761809
GB2_14118	TRI 9716	MEX	Central America	1970----	spring type	500	4.16	4.24	SAMEA118761810
GB2_14119	TRI 9717	AUS	Australia and New Zealand	1970----	spring type	500	2.49	6.1	SAMEA118761811
GB2_14120	TRI 9718	IND	Southern Asia	1970----	spring type	500	22.37	6.03	SAMEA118761812
GB2_14121	TRI 9719	ARG	South America	1970----	spring type	500	12.65	2.17	SAMEA118761813
GB2_14122	TRI 9720	COL	South America	1970----	spring type	500	3.08	7.17	SAMEA118761814
GB2_14123	TRI 9721	IND	Southern Asia	1970----	spring type	500	7.8	3.46	SAMEA118761815
GB2_14124	TRI 9724	PAK	Southern Asia	1970----	spring type	500	16.08	3.82	SAMEA118761816
GB2_14125	TRI 9722	MEX	Central America	1970----	spring type	500	1.37	4.47	SAMEA118761817
GB2_14126	TRI 9723	CAN	Northern America	1970----	spring type	500	2.54	3.18	SAMEA118761818
GB2_14130	TRI 9728	IND	Southern Asia	1970----	spring type	500	17.94	4.89	SAMEA118761822
GB2_14131	TRI 9729	AUS	Australia and New Zealand	1970----	spring type	500	1.87	2.75	SAMEA118761823
GB2_14132	TRI 9730	KEN	Eastern Africa	1970----	spring type	500	8.37	5.39	SAMEA118761824
GB2_14134	TRI 9749	IND	Southern Asia	1970----	spring type	500	14.08	3.75	SAMEA118761826
GB2_14136	TRI 10173	BEL	Western Europe	1972----	facultative	500	5.51	1.32	SAMEA118761828
GB2_14137	TRI 10341	CHN	Eastern Asia	1974----	spring type	300	5.23	7.32	SAMEA118761829
GB2_14138	TRI 10427	MEX	Central America	1973----	spring type	500	5.94	2.39	SAMEA118761830
GB2_14139	TRI 10588	CYP	Western Asia	1973----	spring type	300	12.2	3.61	SAMEA118761831
GB2_14142	TRI 12298	IND	Southern Asia	1979----	spring type	300	11.94	4.82	SAMEA118761834
GB2_14143	TRI 12299	IND	Southern Asia	1979----	spring type	300	9.37	5.47	SAMEA118761835
GB2_14144	TRI 12300	IND	Southern Asia	1980----	spring type	300	16.65	5.11	SAMEA118761836
GB2_14145	TRI 12301	IND	Southern Asia	1980----	spring type	300	14.51	4.32	SAMEA118761837
GB2_14147	TRI 12303	IND	Southern Asia	1980----	spring type	300	34.77	6.04	SAMEA118761839
GB2_14148	TRI 12304	IND	Southern Asia	1979----	spring type	300	10.75	9.04	SAMEA118761840
GB2_14149	TRI 12305	IND	Southern Asia	1980----	spring type	300	2.46	2.61	SAMEA118761841
GB2_14150	TRI 12306	IND	Southern Asia	1980----	spring type	300	18.61	4.61	SAMEA118761842
GB2_14151	TRI 12307	IND	Southern Asia	1980----	spring type	300	8.61	6.75	SAMEA118761843
GB2_14152	TRI 12308	IND	Southern Asia	1980----	spring type	300	6.18	8	SAMEA118761844
GB2_14153	TRI 12310	IND	Southern Asia	1980----	spring type	300	10.18	2.54	SAMEA118761845
GB2_14154	TRI 12312	IND	Southern Asia	1980----	spring type	300	9.32	5.69	SAMEA118761846
GB2_14155	TRI 12316	IND	Southern Asia	1979----	spring type	300	11.32	3.97	SAMEA118761847
GB2_14156	TRI 12323	IND	Southern Asia	1979----	spring type	300	17.61	4.47	SAMEA118761848
GB2_14157	TRI 12324	IND	Southern Asia	1980----	spring type	300	10.61	8.18	SAMEA118761849
GB2_14158	TRI 10041	MEX	Central America	1972----	spring type	500	3.27	3.25	SAMEA118761850
GB2_14160	TRI 10039	MEX	Central America	1972----	spring type	500	13.04	3.54	SAMEA118761852
GB2_14161	TRI 10344	UZB	Central Asia	1973----	spring type	300	18.21	4.82	SAMEA118761853
GB2_14162	TRI 10340	CHN	Eastern Asia	1974----	spring type	300	16.77	5.61	SAMEA118761854
GB2_14164	TRI 12335	IND	Southern Asia	1980----	spring type	300	8.61	7.04	SAMEA118761856
GB2_14165	TRI 12336	IND	Southern Asia	1980----	spring type	300	6.61	6.97	SAMEA118761857
GB2_14166	TRI 12337	IND	Southern Asia	1979----	spring type	300	12.44	4.4	SAMEA118761858
GB2_14167	TRI 12338	IND	Southern Asia	1980----	spring type	300	6.04	4.25	SAMEA118761859
GB2_14168	TRI 12339	IND	Southern Asia	1980----	spring type	300	12.18	4.97	SAMEA118761860
GB2_14169	TRI 12343	IND	Southern Asia	1979----	spring type	300	6	8.9	SAMEA118761861
GB2_14171	TRI 10114	RUS	Eastern Europe	1972----	spring type	500	17.29	6.18	SAMEA118761863
GB2_14172	TRI 10113	RUS	Eastern Europe	1972----	spring type	500	3.67	5.25	SAMEA118761864
GB2_14173	TRI 12351	IND	Southern Asia	1980----	spring type	300	9.43	1.75	SAMEA118761865
GB2_14174	TRI 12348	IND	Southern Asia	1980----	spring type	300	16.2	5.16	SAMEA118761866
GB2_14175	TRI 12352	IND	Southern Asia	1980----	spring type	300	8.57	7.64	SAMEA118761867
GB2_14177	TRI 12355	IND	Southern Asia	1980----	spring type	300	16.14	4.28	SAMEA118761869
GB2_14178	TRI 12357	IND	Southern Asia	1980----	spring type	300	6.5	4.64	SAMEA118761870
GB2_14180	TRI 9734	MEX	Central America	1970----	spring type	500	13.29	2.86	SAMEA118761872
GB2_14181	TRI 9735	MEX	Central America	1970----	spring type	500	7.43	2.28	SAMEA118761873
GB2_14183	TRI 9737	MEX	Central America	1970----	spring type	500	8.14	2.43	SAMEA118761875
GB2_14185	TRI 9739	DZA	Northern Africa	1970----	spring type	500	18.29	6.5	SAMEA118761877
GB2_14186	TRI 9740	AUS	Australia and New Zealand	1970----	spring type	500	6.6	7.86	SAMEA118761878
GB2_14187	TRI 9741	AUS	Australia and New Zealand	1970----	spring type	500	14.43	6.64	SAMEA118761879
GB2_14188	TRI 9742	AUS	Australia and New Zealand	1970----	spring type	500	6.83	5.21	SAMEA118761880
GB2_14189	TRI 9745	CHL	South America	1970----	spring type	500	15.67	6.43	SAMEA118761881
GB2_14191	TRI 9743	CAN	Northern America	1970----	spring type	500	13.71	6.28	SAMEA118761883
GB2_14192	TRI 9746	FRA	Western Europe	1970----	spring type	500	9.14	5.57	SAMEA118761884
GB2_14196	TRI 9751	IND	Southern Asia	1970----	spring type	500	26.57	2.71	SAMEA118761888
GB2_14197	TRI 9752	IND	Southern Asia	1970----	spring type	400	19.2	3.36	SAMEA118761889
GB2_14198	TRI 9756	IND	Southern Asia	1970----	spring type	500	5.75	4.64	SAMEA118761890
GB2_14199	TRI 9757	ITA	Southern Europe	1970----	spring type	500	0.8	5.93	SAMEA118761891
GB2_14200	TRI 9760	JPN	Eastern Asia	1970----	spring type	500	1.4	6.5	SAMEA118761892
GB2_14202	TRI 9762	JPN	Eastern Asia	1970----	spring type	500	1.57	4.21	SAMEA118761894
GB2_14203	TRI 9763	MEX	Central America	1970----	spring type	500	2.57	3	SAMEA118761896
GB2_14204	TRI 9764	MEX	Central America	1970----	spring type	500	13	6.86	SAMEA118761895
GB2_14205	TRI 9765	MEX	Central America	1970----	spring type	500	2.5	5.15	SAMEA118761897
GB2_14206	TRI 9766	MEX	Central America	1970----	spring type	500	12.25	1.65	SAMEA118761898
GB2_14208	TRI 9770	TUN	Northern Africa	1970----	spring type	500	6.33	1.43	SAMEA118761900
GB2_14209	TRI 9771	TUN	Northern Africa	1970----	spring type	500	1.5	5.86	SAMEA118761901
GB2_14211	TRI 9790	ROU	Eastern Europe	1971----	spring type	500	3.86	3.43	SAMEA118761903
GB2_14212	TRI 9795	ROU	Eastern Europe	1971----	spring type	500	3.17	2.93	SAMEA118761904
GB2_14214	TRI 9801	RUS	Eastern Europe	1971----	spring type	500	1.29	4.58	SAMEA118761906
GB2_14215	TRI 12350	IND	Southern Asia	1979----	spring type	300	3.17	0.86	SAMEA118761907
GB2_14216	TRI 12349	IND	Southern Asia	1980----	spring type	300	3.5	3.22	SAMEA118761908
GB2_14217	TRI 12347	IND	Southern Asia	1979----	spring type	300	1	4.01	SAMEA118761909
GB2_14219	TRI 9877	EGY	Northern Africa	1971----	spring type	500	6.67	2.08	SAMEA118761911
GB2_14221	TRI 9888	MEX	Central America	1971----	spring type	500	5	2.15	SAMEA118761913
GB2_14222	TRI 9890	PAK	Southern Asia	1971----	spring type	500	4.67	6.86	SAMEA118761914
GB2_14223	TRI 9891	USA	Northern America	1971----	spring type	500	15.57	6.93	SAMEA118761915
GB2_14225	TRI 10587	CYP	Western Asia	1973----	spring type	300	8.65	8.83	SAMEA118761917
GB2_14227	TRI 12330	IND	Southern Asia	1979----	spring type	300	5.63	5.72	SAMEA118761919
GB2_14228	TRI 12326	IND	Southern Asia	1980----	spring type	300	18.6	5.08	SAMEA118761920
GB2_14229	TRI 12325	IND	Southern Asia	1980----	spring type	300	2.31	2.86	SAMEA118761921
GB2_14230	TRI 9904	COL	South America	1971----	spring type	500	2.03	3.29	SAMEA118761922
GB2_14231	TRI 9905	AUS	Australia and New Zealand	1971----	spring type	500	10.31	1.25	SAMEA118761923
GB2_14232	TRI 9906	AUS	Australia and New Zealand	1971----	spring type	500	12.36	7.96	SAMEA118761924
GB2_14234	TRI 9908	AUS	Australia and New Zealand	1971----	spring type	500	12.78	6.96	SAMEA118761926
GB2_14236	TRI 9910	ZWE	Eastern Africa	1971----	spring type	500	8.6	4.77	SAMEA118761928
GB2_14237	TRI 9911	ZWE	Eastern Africa	1971----	spring type	500	2.03	3.03	SAMEA118761929
GB2_14238	TRI 9913	ARG	South America	1971----	spring type	500	3.86	1.1	SAMEA118761930
GB2_14239	TRI 9914	MEX	Central America	1971----	spring type	500	3.03	4.96	SAMEA118761931
GB2_14240	TRI 9915	IND	Southern Asia	1971----	spring type	500	11.74	1.89	SAMEA118761932
GB2_14242	TRI 9917	RUS	Eastern Europe	1971----	spring type	500	14.19	3.89	SAMEA118761934
GB2_14243	TRI 9918	CZE	Eastern Europe	1971----	spring type	100	3.19	4.1	SAMEA118761935
GB2_14244	TRI 9929	FIN	Northern Europe	1971----	spring type	500	2.63	0.46	SAMEA118761936
GB2_14246	TRI 9933	FIN	Northern Europe	1971----	spring type	500	3.53	2.89	SAMEA118761938
GB2_14247	TRI 9935	CAN	Northern America	1972----	spring type	500	2.83	1.96	SAMEA118761939
GB2_14248	TRI 9937	CAN	Northern America	1972----	spring type	500	9.03	0.82	SAMEA118761940
GB2_14250	TRI 9941	MEX	Central America	1972----	spring type	500	4.43	3.17	SAMEA118761942
GB2_14251	TRI 9950	IND	Southern Asia	1972----	spring type	500	3.02	4.82	SAMEA118761943
GB2_14252	TRI 9946	JPN	Eastern Asia	1972----	spring type	500	5.35	2.46	SAMEA118761944
GB2_14255	TRI 9986	IND	Southern Asia	1972----	spring type	500	18.66	2.89	SAMEA118761947
GB2_14256	TRI 9985	IND	Southern Asia	1972----	spring type	500	5.32	3.6	SAMEA118761948
GB2_14258	TRI 9983	IND	Southern Asia	1972----	spring type	500	7.52	3.6	SAMEA118761950
GB2_14259	TRI 9982	IND	Southern Asia	1972----	spring type	500	10.66	5.59	SAMEA118761951
GB2_14262	TRI 9971	IND	Southern Asia	1972----	spring type	500	6.69	3.45	SAMEA118761954
GB2_14264	TRI 9975	CHL	South America	1972----	spring type	500	2.32	6.59	SAMEA118761956
GB2_14265	TRI 9969	TUR	Western Asia	1972----	spring type	500	14.77	2.37	SAMEA118761957
GB2_14266	TRI 9967	IND	Southern Asia	1972----	spring type	500	5.95	3.45	SAMEA118761958
GB2_14267	TRI 9965	PAK	Southern Asia	1972----	spring type	500	21.69	9.59	SAMEA118761959
GB2_14268	TRI 9963	PAK	Southern Asia	1972----	spring type	500	4.95	5.09	SAMEA118761960
GB2_14271	TRI 9957	TUR	Western Asia	1972----	spring type	500	1.72	7.8	SAMEA118761963
GB2_14272	TRI 9955	TUR	Western Asia	1972----	spring type	500	13.66	4.8	SAMEA118761964
GB2_14274	TRI 10618	CYP	Western Asia	1974----	spring type	300	6.69	3.66	SAMEA118761966
GB2_14276	TRI 10693	GRC	Southern Europe	1974----	spring type	100	4.23	5.16	SAMEA118761968
GB2_14277	TRI 10692	GRC	Southern Europe	1974----	spring type	100	17.69	5.09	SAMEA118761969
GB2_14279	TRI 10688	GRC	Southern Europe	1974----	spring type	100	8.52	5.16	SAMEA118761971
GB2_14280	TRI 10686	GRC	Southern Europe	1974----	spring type	100	7.85	3.66	SAMEA118761972
GB2_14281	TRI 10683	GRC	Southern Europe	1974----	spring type	100	7.92	7.02	SAMEA118761973
GB2_14283	TRI 10673	CYP	Western Asia	1974----	spring type	300	6.94	5.09	SAMEA118761974
GB2_14284	TRI 10671	CYP	Western Asia	1974----	spring type	300	8.51	7.02	SAMEA118761975
GB2_14285	TRI 10663	CYP	Western Asia	1974----	spring type	300	9.68	4.3	SAMEA118761976
GB2_14286	TRI 10659	CYP	Western Asia	1974----	spring type	300	7.25	5.95	SAMEA118761977
GB2_14290	TRI 10650	CYP	Western Asia	1974----	spring type	300	3.94	0.16	SAMEA118761981
GB2_14292	TRI 10643	CYP	Western Asia	1974----	spring type	300	9.42	1.87	SAMEA118761983
GB2_14294	TRI 10637	CYP	Western Asia	1974----	spring type	300	13.48	2.73	SAMEA118761985
GB2_14296	TRI 10628	CYP	Western Asia	1974----	spring type	300	2.08	2.02	SAMEA118761987
GB2_14297	TRI 10626	CYP	Western Asia	1974----	spring type	300	3.51	1.87	SAMEA118761989
GB2_14298	TRI 10625	CYP	Western Asia	1974----	spring type	300	11.75	4.59	SAMEA118761990
GB2_14299	TRI 10622	CYP	Western Asia	1974----	spring type	300	3.42	2.45	SAMEA118761988
GB2_14300	TRI 12369	IND	Southern Asia	1980----	spring type	300	2.42	2.3	SAMEA118761991
GB2_14301	TRI 12269	IND	Southern Asia	1980----	spring type	300	7.37	3.59	SAMEA118761992
GB2_14302	TRI 12287	IND	Southern Asia	1979----	spring type	300	4.92	4.16	SAMEA118761993
GB2_14306	TRI 12249	IND	Southern Asia	1980----	spring type	300	9.37	5.3	SAMEA118761997
GB2_14307	TRI 12178	IND	Southern Asia	1980----	spring type	300	8.8	3.45	SAMEA118761998
GB2_14309	TRI 12224	IND	Southern Asia	1980----	spring type	300	4.75	3.73	SAMEA118761999
GB2_14310	TRI 11703	PAK	Southern Asia	1980----	spring type	NA	11.51	3.87	SAMEA118762000
GB2_14314	TRI 12175	IND	Southern Asia	1979----	spring type	300	9.08	2.45	SAMEA118762004
GB2_14317	TRI 10709	GRC	Southern Europe	1974----	spring type	100	3.23	4.73	SAMEA118762007
GB2_14318	TRI 10708	GRC	Southern Europe	1974----	spring type	100	8.65	4.73	SAMEA118762008
GB2_14320	TRI 10703	GRC	Southern Europe	1974----	spring type	100	3.74	6.73	SAMEA118762010
GB2_14321	TRI 10698	GRC	Southern Europe	1974----	spring type	100	0.49	4.16	SAMEA118762011
GB2_14322	TRI 10164	USA	Northern America	1972----	spring type	500	8.15	1.45	SAMEA118762012
GB2_14323	TRI 10349	PER	South America	1973----	spring type	500	2.34	3.16	SAMEA118762013
GB2_14333	TRI 10335	CHN	Eastern Asia	1974----	spring type	300	6.2	3.71	SAMEA118762023
GB2_14335	TRI 10333	RUS	Eastern Europe	1973----	spring type	500	4.49	5.86	SAMEA118762025
GB2_14337	TRI 9826	EGY	Northern Africa	1971----	spring type	500	5.32	3.14	SAMEA118762027
GB2_14338	TRI 9825	EGY	Northern Africa	1971----	spring type	500	14.29	4.14	SAMEA118762028
GB2_14340	TRI 10328	JOR	Western Asia	1973----	spring type	300	12.2	2.14	SAMEA118762030
GB2_14342	TRI 10315	JPN	Eastern Asia	1972----	spring type	500	5.77	3	SAMEA118762032
GB2_14343	TRI 10311	JPN	Eastern Asia	1972----	spring type	500	5.49	3.86	SAMEA118762033
GB2_14344	TRI 10313	JPN	Eastern Asia	1972----	spring type	500	9.34	5.43	SAMEA118762034
GB2_14346	TRI 10309	COL	South America	1972----	spring type	500	7.63	3.28	SAMEA118762036
GB2_14347	TRI 10308	MEX	Central America	1972----	spring type	500	2.11	2.86	SAMEA118762037
GB2_14350	TRI 10305	MEX	Central America	1972----	spring type	500	12.65	1.57	SAMEA118762040
GB2_14354	TRI 10527	CYP	Western Asia	1973----	spring type	300	10.06	2.43	SAMEA118762044
GB2_14355	TRI 10526	CYP	Western Asia	1973----	spring type	300	1.32	3.14	SAMEA118762045
GB2_14356	TRI 10514	CYP	Western Asia	1973----	spring type	300	14.15	3.43	SAMEA118762046
GB2_14359	TRI 10441	TUN	Northern Africa	1973----	spring type	500	3.2	3.57	SAMEA118762049
GB2_14360	TRI 10442	MEX	Central America	1973----	spring type	500	1.61	2.57	SAMEA118762050
GB2_14363	TRI 10437	IRQ	Western Asia	1973----	spring type	500	1.28	2	SAMEA118762053
GB2_14364	TRI 10436	CAN	Northern America	1973----	spring type	500	1.61	1.71	SAMEA118762054
GB2_14367	TRI 10433	ZWE	Eastern Africa	1973----	spring type	500	1.78	4	SAMEA118762057
GB2_14370	TRI 10430	USA	Northern America	1973----	spring type	500	1.28	2.28	SAMEA118762060
GB2_14371	TRI 10429	PAK	Southern Asia	1973----	spring type	500	2.94	3.01	SAMEA118762061
GB2_14373	TRI 10426	TUN	Northern Africa	1973----	spring type	500	1.28	1.44	SAMEA118762063
GB2_14375	TRI 10364	RUS	Eastern Europe	1973----	spring type	500	1.28	4.16	SAMEA118762065
GB2_14376	TRI 10363	MEX	Central America	1973----	spring type	500	2.44	1.59	SAMEA118762066
GB2_14377	TRI 10352	PER	South America	1973----	spring type	500	1.28	8.59	SAMEA118762067
GB2_14378	TRI 10351	PER	South America	1973----	spring type	500	7.14	0.73	SAMEA118762068
GB2_14379	TRI 10350	PER	South America	1973----	spring type	500	1.28	8.3	SAMEA118762069
GB2_14386	TRI 8896	AUT	Western Europe	1966----	spring type	300	16.28	4.59	SAMEA118762076
GB2_14388	TRI 8899	AUT	Western Europe	1966----	spring type	300	6.42	2.87	SAMEA118762078
GB2_14389	TRI 10345	AUS	Australia and New Zealand	1973----	spring type	500	4.85	0.73	SAMEA118762079
GB2_14390	TRI 10347	PER	South America	1973----	spring type	500	2.85	2.59	SAMEA118762080
GB2_15516	TRI 13864	NA	NA	1983----	spring type	500	0.76	4.86	SAMEA118762082
GB2_15531	TRI 14561	LBY	Northern Africa	1984----	spring type	300	12.05	4.99	SAMEA118762087
GB2_15537	TRI 14567	LBY	Northern Africa	1984----	spring type	300	6.72	8.56	SAMEA118762093
GB2_15543	TRI 14577	LBY	Northern Africa	1984----	spring type	300	11.05	6.63	SAMEA118762099
GB2_15544	TRI 14578	LBY	Northern Africa	1984----	spring type	300	13.91	7.77	SAMEA118762100
GB2_15545	TRI 14579	LBY	Northern Africa	1984----	spring type	300	10.37	6.7	SAMEA118762101
GB2_15547	TRI 14581	LBY	Northern Africa	1984----	spring type	300	12.15	0.99	SAMEA118762103
GB2_15548	TRI 14582	LBY	Northern Africa	1984----	spring type	300	8.22	5.06	SAMEA118762104
GB2_15550	TRI 14584	LBY	Northern Africa	1983----	spring type	300	20.22	3.34	SAMEA118762106
GB2_15551	TRI 14585	LBY	Northern Africa	1984----	spring type	300	15.82	2.06	SAMEA118762107
GB2_15552	TRI 14586	LBY	Northern Africa	1983----	spring type	300	3.65	8.34	SAMEA118762108
GB2_15553	TRI 14587	LBY	Northern Africa	1983----	spring type	300	12.65	3.63	SAMEA118762109
GB2_15554	TRI 14588	LBY	Northern Africa	1983----	spring type	300	17.22	5.84	SAMEA118762110
GB2_15556	TRI 14590	LBY	Northern Africa	1984----	spring type	300	5.51	6.56	SAMEA118762111
GB2_15559	TRI 14595	LBY	Northern Africa	1984----	spring type	300	-3.35	5.02	SAMEA118762113
GB2_15560	TRI 14596	LBY	Northern Africa	1983----	spring type	300	6.37	8.02	SAMEA118762114
GB2_15570	TRI 14607	LBY	Northern Africa	1983----	spring type	300	5.37	1.16	SAMEA118762116
GB2_15572	TRI 14609	LBY	Northern Africa	1984----	spring type	300	14.86	4.09	SAMEA118762118
GB2_15573	TRI 14610	LBY	Northern Africa	1983----	spring type	300	7.86	7.24	SAMEA118762119
GB2_15575	TRI 14612	LBY	Northern Africa	1983----	spring type	300	15.57	7.45	SAMEA118762121
GB2_15577	TRI 14613	LBY	Northern Africa	1983----	spring type	300	15.28	6.95	SAMEA118762122
GB2_15579	TRI 14616	LBY	Northern Africa	1984----	spring type	300	7	6.88	SAMEA118762123
GB2_15585	TRI 14624	LBY	Northern Africa	1983----	spring type	300	8.71	5.74	SAMEA118762128
GB2_15597	TRI 14637	LBY	Northern Africa	1984----	spring type	300	1.5	3.96	SAMEA118762133
GB2_15602	TRI 14642	LBY	Northern Africa	1984----	spring type	300	10.71	8.67	SAMEA118762137
GB2_15605	TRI 14645	LBY	Northern Africa	1984----	spring type	300	25.95	10.81	SAMEA118762138
GB2_15609	TRI 14649	LBY	Northern Africa	1984----	spring type	300	7	10.88	SAMEA118762141
GB2_15612	TRI 14652	LBY	Northern Africa	1983----	spring type	300	18.43	5.31	SAMEA118762140
GB2_15615	TRI 14655	LBY	Northern Africa	1984----	spring type	300	8.5	9.53	SAMEA118762145
GB2_15619	TRI 14659	LBY	Northern Africa	1983----	spring type	300	10.74	3.38	SAMEA118762147
GB2_15620	TRI 14660	LBY	Northern Africa	1983----	spring type	300	6.02	6.74	SAMEA118762148
GB2_15623	TRI 14664	LBY	Northern Africa	1983----	spring type	300	6.86	6.81	SAMEA118762150
GB2_15624	TRI 14665	LBY	Northern Africa	1983----	spring type	300	23.09	7.81	SAMEA118762151
GB2_15628	TRI 14671	LBY	Northern Africa	1983----	spring type	300	18.16	4.69	SAMEA118762154
GB2_15629	TRI 14672	LBY	Northern Africa	1984----	spring type	300	18.09	1.76	SAMEA118762155
GB2_15630	TRI 14673	LBY	Northern Africa	1983----	spring type	300	14.88	4.41	SAMEA118762156
GB2_15631	TRI 14674	LBY	Northern Africa	1983----	spring type	300	17.59	4.41	SAMEA118762157
GB2_15634	TRI 14677	LBY	Northern Africa	1983----	spring type	300	12.76	3.33	SAMEA118762160
GB2_15635	TRI 14678	LBY	Northern Africa	1983----	spring type	300	8.59	5.41	SAMEA118762161
GB2_15637	TRI 14680	LBY	Northern Africa	1983----	spring type	300	15.59	5.15	SAMEA118762163
GB2_15638	TRI 14682	LBY	Northern Africa	1983----	spring type	300	2.74	6.43	SAMEA118762164
GB2_15639	TRI 14683	LBY	Northern Africa	1983----	spring type	300	10.76	4.29	SAMEA118762165
GB2_15642	TRI 14692	LBY	Northern Africa	1984----	spring type	300	14.45	5.86	SAMEA118762167
GB2_15643	TRI 14693	LBY	Northern Africa	1984----	spring type	300	22.02	10.86	SAMEA118762168
GB2_15644	TRI 14694	LBY	Northern Africa	1984----	spring type	300	4.02	5.43	SAMEA118762169
GB2_15646	TRI 14696	LBY	Northern Africa	1983----	spring type	300	8.45	1.57	SAMEA118762171
GB2_15647	TRI 14685	LBY	Northern Africa	1984----	spring type	300	4.59	8.29	SAMEA118762172
GB2_15648	TRI 14697	LBY	Northern Africa	1984----	spring type	300	20.95	1	SAMEA118762173
GB2_15652	TRI 15534	ETH	Eastern Africa	1986----	spring type	300	7.1	3.72	SAMEA118762177
GB2_15657	TRI 14714	LBY	Northern Africa	1983----	spring type	300	-1.9	6.14	SAMEA118762182
GB2_15660	TRI 14718	LBY	Northern Africa	1983----	spring type	300	-1.9	6.07	SAMEA118762185
GB2_15661	TRI 14719	LBY	Northern Africa	1983----	spring type	300	14.81	6.57	SAMEA118762186
GB2_15662	TRI 14721	LBY	Northern Africa	1984----	spring type	300	10.95	3.72	SAMEA118762187
GB2_15663	TRI 14722	LBY	Northern Africa	1983----	spring type	300	12.95	5.4	SAMEA118762188
GB2_15665	TRI 14729	NA	NA	1984----	spring type	500	16.67	6.54	SAMEA118762190
GB2_15666	TRI 14730	NA	NA	1984----	spring type	500	13.71	12.4	SAMEA118762191
GB2_15667	TRI 14756	CHN	Eastern Asia	1985----	facultative	500	3.67	3.25	SAMEA118762192
GB2_15671	TRI 14767	ETH	Eastern Africa	1985----	spring type	300	3.1	6.97	SAMEA118762194
GB2_15677	TRI 14829	ETH	Eastern Africa	1985----	spring type	300	10.43	9.11	SAMEA118762198
GB2_15680	TRI 14835	ETH	Eastern Africa	1983----	spring type	300	11.38	10.11	SAMEA118762199
GB2_15687	TRI 14994	GEO	Western Asia	1986----	spring type	300	5.1	13.83	SAMEA118762201
GB2_15690	TRI 16235	ETH	Eastern Africa	1987----	spring type	300	4.95	9.4	SAMEA118762204
GB2_15692	TRI 15008	ETH	Eastern Africa	1986----	spring type	300	13.67	-1.32	SAMEA118762206
GB2_15693	TRI 15010	ETH	Eastern Africa	1986----	spring type	300	6.95	9.97	SAMEA118762207
GB2_15694	TRI 15011	ETH	Eastern Africa	1985----	spring type	300	16.45	10.68	SAMEA118762208
GB2_15696	TRI 15014	ETH	Eastern Africa	1986----	spring type	300	16.03	8.83	SAMEA118762210
GB2_15697	TRI 15016	ETH	Eastern Africa	1985----	spring type	300	16.74	7.19	SAMEA118762211
GB2_15699	TRI 15018	ETH	Eastern Africa	1986----	spring type	300	28.6	7.76	SAMEA118762213
GB2_15700	TRI 15026	ETH	Eastern Africa	1986----	spring type	300	14.31	6.76	SAMEA118762214
GB2_15701	TRI 15029	ETH	Eastern Africa	1986----	spring type	300	6.17	-0.24	SAMEA118762215
GB2_15703	TRI 15035	ETH	Eastern Africa	1985----	spring type	300	6.76	5.62	SAMEA118762217
GB2_15704	TRI 15037	ETH	Eastern Africa	1986----	spring type	300	6.17	4.19	SAMEA118762218
GB2_15707	TRI 15041	ETH	Eastern Africa	1985----	spring type	300	16.03	6.33	SAMEA118762220
GB2_15708	TRI 15043	ETH	Eastern Africa	1986----	spring type	300	4.17	0.04	SAMEA118762221
GB2_15711	TRI 15046	ETH	Eastern Africa	1985----	spring type	300	10.38	9.9	SAMEA118762224
GB2_15712	TRI 15048	ETH	Eastern Africa	1984----	spring type	300	6.61	6.62	SAMEA118762225
GB2_15713	TRI 15080	ETH	Eastern Africa	1985----	spring type	300	7.17	1.47	SAMEA118762226
GB2_15714	TRI 15081	ETH	Eastern Africa	1986----	spring type	300	-0.55	1.33	SAMEA118762227
GB2_15715	TRI 15094	ETH	Eastern Africa	1985----	spring type	300	9.88	-0.53	SAMEA118762228
GB2_15718	TRI 15086	ETH	Eastern Africa	1986----	spring type	300	28.74	16.19	SAMEA118762230
GB2_15720	TRI 15090	ETH	Eastern Africa	1986----	spring type	300	8.88	-0.53	SAMEA118762232
GB2_15721	TRI 15092	ETH	Eastern Africa	1985----	spring type	300	17.6	-0.53	SAMEA118762233
GB2_15722	TRI 15093	ETH	Eastern Africa	1986----	spring type	300	8.24	3.83	SAMEA118762234
GB2_15723	TRI 15124	GEO	Western Asia	1986----	spring type	300	-0.74	5.47	SAMEA118762235
GB2_15724	TRI 15130	GEO	Western Asia	1985----	spring type	300	9.03	2.9	SAMEA118762236
GB2_15726	TRI 15133	GEO	Western Asia	1985----	spring type	300	8.49	7.06	SAMEA118762238
GB2_15733	TRI 15140	GEO	Western Asia	1985----	spring type	300	1.82	3.92	SAMEA118762243
GB2_15734	TRI 15141	GEO	Western Asia	1985----	spring type	300	8.77	2.35	SAMEA118762244
GB2_15739	TRI 15264	ITA	Southern Europe	1987----	spring type	300	8.34	16.06	SAMEA118762249
GB2_15745	TRI 15270	ITA	Southern Europe	1987----	spring type	300	9.49	5.52	SAMEA118762255
GB2_15751	TRI 15284	IRQ	Western Asia	1987----	spring type	300	11.77	8.49	SAMEA118762261
GB2_15754	TRI 15294	IRQ	Western Asia	1986----	spring type	300	11.06	4.06	SAMEA118762264
GB2_15756	TRI 15295	IRQ	Western Asia	1987----	spring type	300	7.34	1.49	SAMEA118762266
GB2_15759	TRI 15831	ETH	Eastern Africa	1986----	spring type	300	17.15	3.49	SAMEA118762269
GB2_15761	TRI 16907	TUR	Western Asia	1991----	spring type	300	17.2	3.35	SAMEA118762271
GB2_15767	TRI 15308	GEO	Western Asia	1986----	spring type	300	20.2	6.63	SAMEA118762277
GB2_15776	TRI 15350	ITA	Southern Europe	1987----	spring type	300	15.77	4.49	SAMEA118762284
GB2_15777	TRI 15354	ETH	Eastern Africa	1986----	spring type	300	8.49	0.63	SAMEA118762285
GB2_15779	TRI 15362	ETH	Eastern Africa	1987----	spring type	300	8.2	6.26	SAMEA118762287
GB2_15780	TRI 15370	ETH	Eastern Africa	1987----	spring type	300	16.72	5.26	SAMEA118762288
GB2_15781	TRI 15384	ETH	Eastern Africa	1986----	spring type	300	13.41	8.83	SAMEA118762289
GB2_15782	TRI 15397	ETH	Eastern Africa	1986----	spring type	300	5.26	8.97	SAMEA118762290
GB2_15784	TRI 15399	ETH	Eastern Africa	1986----	spring type	300	14.98	8.97	SAMEA118762292
GB2_15788	TRI 15444	ETH	Eastern Africa	1986----	spring type	300	19.12	1.26	SAMEA118762296
GB2_15790	TRI 15447	ETH	Eastern Africa	1986----	spring type	300	23.26	1.69	SAMEA118762298
GB2_15792	TRI 15476	ETH	Eastern Africa	1986----	spring type	300	14.84	12.54	SAMEA118762300
GB2_15797	TRI 15514	ETH	Eastern Africa	1986----	spring type	300	4.69	9.83	SAMEA118762306
GB2_15798	TRI 15515	ETH	Eastern Africa	1986----	spring type	300	13.41	16.12	SAMEA118762307
GB2_15799	TRI 15517	ETH	Eastern Africa	1986----	spring type	300	25.55	4.69	SAMEA118762308
GB2_15801	TRI 15520	ETH	Eastern Africa	1986----	spring type	300	7.26	0.4	SAMEA118762309
GB2_15805	TRI 15525	ETH	Eastern Africa	1986----	spring type	300	11.55	7.4	SAMEA118762313
GB2_15808	TRI 15540	ETH	Eastern Africa	1986----	spring type	300	17.12	4.54	SAMEA118762316
GB2_15809	TRI 15537	ETH	Eastern Africa	1986----	spring type	300	9.12	6.97	SAMEA118762317
GB2_15811	TRI 16191	ETH	Eastern Africa	1987----	spring type	300	14.69	5.54	SAMEA118762319
GB2_15813	TRI 16194	ETH	Eastern Africa	1987----	spring type	300	16.62	8.76	SAMEA118762321
GB2_15814	TRI 15541	ETH	Eastern Africa	1986----	spring type	300	14.55	5.33	SAMEA118762322
GB2_15815	TRI 15542	ETH	Eastern Africa	1986----	spring type	300	7.98	9.19	SAMEA118762323
GB2_15818	TRI 15545	ETH	Eastern Africa	1986----	spring type	300	1.12	3.76	SAMEA118762326
GB2_15819	TRI 15573	ETH	Eastern Africa	1986----	spring type	300	8.16	12.04	SAMEA118762327
GB2_15820	TRI 15578	ETH	Eastern Africa	1986----	spring type	300	1.71	4.9	SAMEA118762328
GB2_15822	TRI 15604	ETH	Eastern Africa	1986----	spring type	300	14.05	11.47	SAMEA118762330
GB2_15823	TRI 15538	ETH	Eastern Africa	1986----	spring type	300	7.71	0.19	SAMEA118762331
GB2_15824	TRI 15516	ETH	Eastern Africa	1986----	spring type	300	16.88	1.47	SAMEA118762332
GB2_15827	TRI 15804	ETH	Eastern Africa	1986----	spring type	300	15.88	8.47	SAMEA118762335
GB2_15831	TRI 15810	ETH	Eastern Africa	1986----	spring type	300	10.21	4.19	SAMEA118762338
GB2_15832	TRI 15811	ETH	Eastern Africa	1986----	spring type	300	6.02	5.47	SAMEA118762339
GB2_15835	TRI 15608	ETH	Eastern Africa	1986----	spring type	300	9.74	3.33	SAMEA118762342
GB2_15836	TRI 15725	ETH	Eastern Africa	1986----	spring type	300	5.05	3.61	SAMEA118762343
GB2_15837	TRI 15630	ETH	Eastern Africa	1986----	spring type	300	11.05	8.33	SAMEA118762344
GB2_15839	TRI 15785	ETH	Eastern Africa	1986----	spring type	300	17.59	11.9	SAMEA118762346
GB2_15840	TRI 15539	ETH	Eastern Africa	1986----	spring type	300	10.02	4.47	SAMEA118762347
GB2_15846	TRI 15845	ETH	Eastern Africa	1987----	spring type	300	6.02	2.9	SAMEA118762353
GB2_15850	TRI 15920	TUR	Western Asia	1987----	spring type	400	6.31	3.61	SAMEA118762357
GB2_15851	TRI 15921	MEX	Central America	1987----	spring type	400	8.45	7.7	SAMEA118762358
GB2_15856	TRI 15935	IND	Southern Asia	1987----	spring type	500	6.45	5.56	SAMEA118762363
GB2_15861	TRI 15942	NA	NA	1987----	spring type	300	4.31	2.28	SAMEA118762367
GB2_15863	TRI 15946	PAK	Southern Asia	1987----	spring type	300	6.45	3.99	SAMEA118762369
GB2_15865	TRI 15948	NA	NA	1987----	spring type	300	9.38	9.7	SAMEA118762371
GB2_15866	TRI 15949	NA	NA	1987----	spring type	400	9.67	5.99	SAMEA118762372
GB2_15869	TRI 15954	NA	NA	1987----	spring type	400	2.67	7.42	SAMEA118762375
GB2_15873	TRI 15960	CHE	Western Europe	1987----	spring type	400	13.09	9.56	SAMEA118762378
GB2_15875	TRI 15968	PAK	Southern Asia	1987----	spring type	400	3.81	3.85	SAMEA118762379
GB2_15880	TRI 15963	RUS	Eastern Europe	1987----	spring type	500	17.09	2.28	SAMEA118762384
GB2_15881	TRI 15962	AFG	Southern Asia	1987----	spring type	400	5.59	1.7	SAMEA118762385
GB2_15883	TRI 15970	NA	NA	1987----	spring type	500	4.26	11.13	SAMEA118762387
GB2_15885	TRI 15974	AUS	Australia and New Zealand	1987----	spring type	400	4.24	3.56	SAMEA118762389
GB2_15887	TRI 15976	USA	Northern America	1987----	spring type	500	6.95	1.56	SAMEA118762391
GB2_15891	TRI 15984	USA	Northern America	1987----	spring type	500	2.59	4.28	SAMEA118762396
GB2_15894	TRI 15988	NPL	Southern Asia	1987----	spring type	400	18.52	7.42	SAMEA118762399
GB2_15895	TRI 15989	USA	Northern America	1987----	spring type	400	8.93	3.99	SAMEA118762393
GB2_15900	TRI 16056	IRQ	Western Asia	1987----	spring type	300	2.52	3.56	SAMEA118762403
GB2_15901	TRI 16061	IRQ	Western Asia	1987----	spring type	300	15.95	1.73	SAMEA118762404
GB2_15903	TRI 16063	IRQ	Western Asia	1987----	spring type	300	6.09	2.01	SAMEA118762406
GB2_15904	TRI 16069	IRQ	Western Asia	1987----	spring type	300	4.52	4.44	SAMEA118762407
GB2_15905	TRI 16071	IRQ	Western Asia	1987----	spring type	300	9.52	1.58	SAMEA118762408
GB2_15906	TRI 16072	IRQ	Western Asia	1987----	spring type	300	9.24	3.3	SAMEA118762409
GB2_15908	TRI 16075	IRQ	Western Asia	1987----	spring type	300	6.59	8.01	SAMEA118762411
GB2_15909	TRI 16076	IRQ	Western Asia	1987----	spring type	300	6.24	8.87	SAMEA118762412
GB2_15911	TRI 16079	IRQ	Western Asia	1987----	spring type	300	5.71	5.16	SAMEA118762414
GB2_15912	TRI 16080	IRQ	Western Asia	1987----	spring type	300	6.43	5.87	SAMEA118762415
GB2_15914	TRI 16082	IRQ	Western Asia	1987----	spring type	300	8.71	8.16	SAMEA118762417
GB2_15915	TRI 16085	IRQ	Western Asia	1987----	spring type	300	7	7.44	SAMEA118762418
GB2_15916	TRI 16084	IRQ	Western Asia	1987----	spring type	300	12.43	11.87	SAMEA118762419
GB2_15917	TRI 16086	IRQ	Western Asia	1987----	spring type	300	6.5	6.44	SAMEA118762420
GB2_15927	TRI 16123	ETH	Eastern Africa	1987----	spring type	300	7	6.44	SAMEA118762430
GB2_15928	TRI 16124	ETH	Eastern Africa	1987----	spring type	300	11.86	11.3	SAMEA118762431
GB2_15929	TRI 16125	ETH	Eastern Africa	1987----	spring type	300	6	5.44	SAMEA118762432
GB2_15931	TRI 16127	ETH	Eastern Africa	1987----	spring type	300	9	8.44	SAMEA118762434
GB2_15932	TRI 14537	LBY	Northern Africa	1983----	spring type	300	0	-0.56	SAMEA118762435
GB2_15933	TRI 16130	ETH	Eastern Africa	1987----	spring type	300	6.2	6.16	SAMEA118762436
GB2_15935	TRI 16132	ETH	Eastern Africa	1987----	spring type	300	6.83	7.3	SAMEA118762438
GB2_15936	TRI 15567	ETH	Eastern Africa	1986----	spring type	300	7.96	8.64	SAMEA118762439
GB2_15938	TRI 16133	ETH	Eastern Africa	1987----	spring type	300	6.62	7.22	SAMEA118762441
GB2_15940	TRI 16135	ETH	Eastern Africa	1987----	spring type	300	7.12	6.36	SAMEA118762443
GB2_15944	TRI 16141	ETH	Eastern Africa	1987----	spring type	300	9.12	8.36	SAMEA118762447
GB2_15945	TRI 16142	ETH	Eastern Africa	1987----	spring type	300	7.41	6.64	SAMEA118762448
GB2_15947	TRI 16148	ETH	Eastern Africa	1987----	spring type	300	9.7	8.93	SAMEA118762450
GB2_15948	TRI 16149	ETH	Eastern Africa	1987----	spring type	300	8.98	8.22	SAMEA118762451
GB2_15949	TRI 16153	ETH	Eastern Africa	1987----	spring type	300	8.27	7.5	SAMEA118762452
GB2_15950	TRI 16154	ETH	Eastern Africa	1987----	spring type	300	10.12	9.36	SAMEA118762453
GB2_15951	TRI 16157	ETH	Eastern Africa	1987----	spring type	NA	12.12	11.36	SAMEA118762454
GB2_15953	TRI 16160	ETH	Eastern Africa	1987----	spring type	300	7.41	6.64	SAMEA118762456
GB2_15958	TRI 16167	ETH	Eastern Africa	1987----	spring type	300	10.27	9.5	SAMEA118762461
GB2_15961	TRI 16181	ETH	Eastern Africa	1987----	spring type	300	11.12	10.36	SAMEA118762464
GB2_15962	TRI 16182	ETH	Eastern Africa	1987----	spring type	300	8.27	7.5	SAMEA118762465
GB2_15963	TRI 16183	ETH	Eastern Africa	1987----	spring type	300	5.27	4.5	SAMEA118762466
GB2_15964	TRI 16184	ETH	Eastern Africa	1987----	spring type	300	5.84	5.07	SAMEA118762467
GB2_15965	TRI 16185	ETH	Eastern Africa	1987----	spring type	300	3.27	2.5	SAMEA118762468
GB2_15966	TRI 16186	ETH	Eastern Africa	1987----	spring type	300	8.41	7.64	SAMEA118762469
GB2_15969	TRI 16189	ETH	Eastern Africa	1987----	spring type	300	9.27	8.5	SAMEA118762472
GB2_15970	TRI 16198	ETH	Eastern Africa	1987----	spring type	300	7.79	8.5	SAMEA118762473
GB2_16098	TRI 17177	GEO	Western Asia	1993----	spring type	300	7.03	2.92	SAMEA118762587
GB2_16099	TRI 17180	GBR	Northern Europe	1993----	spring type	300	5.1	4.78	SAMEA118762588
GB2_16101	TRI 17189	USA	Northern America	1993----	spring type	300	5.6	3.07	SAMEA118762590
GB2_16103	TRI 17191	TUR	Western Asia	1993----	spring type	300	5.93	4.35	SAMEA118762592
GB2_16104	TRI 17192	TUR	Western Asia	1993----	spring type	300	9.6	5.92	SAMEA118762593
GB2_16105	TRI 17193	TUR	Western Asia	1993----	spring type	300	6.88	4.5	SAMEA118762594
GB2_16106	TRI 17194	TUR	Western Asia	1993----	spring type	300	4.6	3.78	SAMEA118762595
GB2_16107	TRI 17195	TUR	Western Asia	1993----	spring type	300	9.6	3.5	SAMEA118762596
GB2_16108	TRI 17207	SYR	Western Asia	1993----	spring type	NA	8.6	4.21	SAMEA118762597
GB2_16109	TRI 17225	NA	NA	1993----	spring type	300	5.88	3.21	SAMEA118762598
GB2_16113	TRI 17274	CHN	Eastern Asia	1994----	spring type	400	10.1	5.64	SAMEA118762602
GB2_16115	TRI 17276	CHN	Eastern Asia	1994----	spring type	400	6.1	4.21	SAMEA118762604
GB2_16116	TRI 17277	CHN	Eastern Asia	1994----	spring type	400	6.88	4.92	SAMEA118762605
GB2_16117	TRI 17278	JPN	Eastern Asia	1994----	spring type	500	8.74	1.92	SAMEA118762606
GB2_16118	TRI 17279	JPN	Eastern Asia	1994----	spring type	500	5.6	1.92	SAMEA118762607
GB2_16119	TRI 17280	JPN	Eastern Asia	1994----	spring type	500	4.93	1.92	SAMEA118762608
GB2_16121	TRI 17282	JPN	Eastern Asia	1994----	spring type	500	5.1	1.92	SAMEA118762609
GB2_16126	TRI 17288	CHN	Eastern Asia	1994----	spring type	500	4.76	1.92	SAMEA118762613
GB2_16127	TRI 17291	JPN	Eastern Asia	1994----	spring type	500	5.17	1.92	SAMEA118762614
GB2_16130	TRI 17323	TUN	Northern Africa	1994----	spring type	300	5.57	1.92	SAMEA118762615
GB2_16131	TRI 17315	TUN	Northern Africa	1994----	spring type	300	6.24	1.92	SAMEA118762616
GB2_16132	TRI 17330	TUN	Northern Africa	1994----	spring type	300	9.84	1.92	SAMEA118762617
GB2_16133	TRI 17334	TUN	Northern Africa	1994----	spring type	300	6.41	1.92	SAMEA118762618
GB2_16141	TRI 17363	TUN	Northern Africa	1994----	spring type	300	15.26	1.92	SAMEA118762621
GB2_16143	TRI 17366	TUN	Northern Africa	1994----	spring type	300	5.69	1.92	SAMEA118762623
GB2_16147	TRI 17374	TUN	Northern Africa	1994----	spring type	300	5.41	1.92	SAMEA118762625
GB2_16149	TRI 17378	TUN	Northern Africa	1994----	spring type	300	5.61	4.91	SAMEA118762627
GB2_16151	TRI 17385	TUN	Northern Africa	1994----	spring type	300	5.41	4.2	SAMEA118762628
GB2_16152	TRI 17387	ITA	Southern Europe	1995----	spring type	300	5.41	2.34	SAMEA118762629
GB2_16153	TRI 17395	NA	NA	1994----	spring type	300	6.24	1.91	SAMEA118762630
GB2_16154	TRI 17396	NA	NA	1994----	spring type	300	5.41	1.91	SAMEA118762631
GB2_16155	TRI 17397	NA	NA	1994----	spring type	300	5.41	1.91	SAMEA118762632
GB2_16201	TRI 25751	RUS	Eastern Europe	20031020	spring type	400	0	3.12	SAMEA118762673
GB2_16202	TRI 29701	OMN	Western Asia	2011----	spring type	300	0	3.12	SAMEA118762674
GB2_16203	TRI 20356	IRN	Southern Asia	20030821	spring type	NA	0	3.12	SAMEA118762675
GB2_16204	TRI 20393	IRN	Southern Asia	20030821	spring type	NA	0	3.12	SAMEA118762676
GB2_16366	TRI 17937	FRA	Western Europe	1996----	spring type	300	7.29	4.59	SAMEA118757256
GB2_16396	TRI 17985	GRC	Southern Europe	1997----	spring type	300	11.85	5.61	SAMEA118757278
GB2_16397	TRI 18012	ITA	Southern Europe	1995----	spring type	300	5.92	9.36	SAMEA118757279
GB2_16418	TRI 18292	MAR	Northern Africa	1986----	spring type	300	6.56	5.32	SAMEA118757295
GB2_16433	TRI 18672	ESP	Southern Europe	1999----	spring type	300	9.59	11.79	SAMEA118757307
GB2_16457	TRI 19050	NA	NA	20030113	spring type	500	22.42	17.86	SAMEA118757326
GB2_16472	TRI 19082	DEU	Western Europe	20030113	spring type	300	7.05	3.62	SAMEA118757339
GB2_16483	TRI 19134	NA	NA	20030114	spring type	500	1.42	6.72	SAMEA118757350
GB2_16493	TRI 19213	DEU	Western Europe	20030114	spring type	500	14.05	11.13	SAMEA118757358
GB2_16506	TRI 19243	BGR	Eastern Europe	20030114	spring type	400	7.86	3.12	SAMEA118757371
GB2_16515	TRI 19263	NA	NA	20030115	spring type	500	6	4.27	SAMEA118757379
GB2_16516	TRI 19264	NA	NA	20030115	spring type	500	5.16	3.47	SAMEA118757380
GB2_16529	TRI 19311	PRT	Southern Europe	20030116	spring type	300	30.5	12.43	SAMEA118757390
GB2_16543	TRI 19356	IRN	Southern Asia	20030116	spring type	400	9.07	6.12	SAMEA118757404
GB2_16554	TRI 20278	IRN	Southern Asia	20030821	spring type	NA	12.49	3.89	SAMEA118757413
GB2_16565	TRI 20379	IRN	Southern Asia	20030821	spring type	NA	10.08	0.26	SAMEA118757424
GB2_16591	TRI 21672	ESP	Southern Europe	20030905	spring type	300	17	7.34	SAMEA118757448
GB2_16608	TRI 23069	AFG	Southern Asia	20030917	spring type	300	12.88	3.86	SAMEA118757465
GB2_16611	TRI 23479	USA	Northern America	20030922	spring type	400	6.72	10.55	SAMEA118757468
GB2_16648	TRI 28721	IRN	Southern Asia	20031203	spring type	300	3.66	9.3	SAMEA118757499
GB2_16655	TRI 28732	NA	NA	20031203	spring type	500	1.59	10.58	SAMEA118757527
GB2_16658	TRI 27606	BGR	Eastern Europe	20031104	spring type	500	11.43	3.19	SAMEA118757534
GB2_16675	TRI 17713	CAN	Northern America	1995----	spring type	500	3.38	4.81	SAMEA118757547
GB2_16692	TRI 27665	IRN	Southern Asia	20031104	spring type	400	4.99	0.51	SAMEA118757561
GB2_16694	TRI 27765	IRN	Southern Asia	20031104	spring type	400	23.5	6.15	SAMEA118757563
GB2_16726	TRI 28717	NA	NA	20031203	spring type	500	9.99	2.89	SAMEA118757595
GB2_16731	TRI 28738	NA	NA	20031203	spring type	500	3.71	5.04	SAMEA118757600
GB2_16747	TRI 19622	NA	NA	20030813	spring type	300	5.72	8.91	SAMEA118757617
GB2_16750	TRI 19628	NA	NA	20030813	spring type	300	9.35	6.12	SAMEA118757619
GB2_16790	TRI 19971	USA	Northern America	20030818	spring type	400	10.71	2.89	SAMEA118757658
GB2_16799	TRI 19998	MEX	Central America	20030818	spring type	400	6.66	5.8	SAMEA118757667
GB2_16800	TRI 20000	MEX	Central America	20030818	spring type	400	7.85	2.75	SAMEA118757668
GB2_16803	TRI 20018	NA	NA	20030819	spring type	500	6.99	2.23	SAMEA118757671
GB2_16807	TRI 20024	TUR	Western Asia	20030819	spring type	400	9.99	5.47	SAMEA118757675
GB2_16812	TRI 20033	KEN	Eastern Africa	20030819	spring type	400	-0.95	4.29	SAMEA118757680
GB2_16813	TRI 20034	DEU	Western Europe	20030819	spring type	400	11.15	1.89	SAMEA118757681
GB2_16832	TRI 28840	DEU	Western Europe	20031204	spring type	300	5.05	5.77	SAMEA118757697
GB2_16857	TRI 29399	MAR	Northern Africa	1986----	spring type	300	2.82	3.75	SAMEA118757720
GB2_16882	TRI 29504	ARM	Western Asia	2002----	spring type	100	8.49	4.89	SAMEA118757739
GB2_16906	TRI 29652	OMN	Western Asia	2011----	spring type	300	6.12	5.18	SAMEA118757761
GB2_17068	TRI 20240	NA	NA	20030820	spring type	300	11.78	5.34	SAMEA118757914
GB2_17166	TRI 3419	DEU	Western Europe	1950----	spring type	500	8.07	-0.09	SAMEA118757943
GB2_17270	TRI 21646	PRT	Southern Europe	20030904	spring type	400	9	6.06	SAMEA118757990
GB2_17307	TRI 21521	USA	Northern America	20030904	spring type	400	3.75	4.33	SAMEA118758022
GB2_17392	TRI 21726	USA	Northern America	20030905	spring type	400	4.8	9.45	SAMEA118758094
GB2_17396	TRI 21738	NA	NA	20030905	spring type	300	0.72	7.56	SAMEA118758097
GB2_17455	TRI 21634	TUR	Western Asia	20030904	spring type	300	4.37	4.71	SAMEA118758132
GB2_17562	TRI 22169	AUT	Western Europe	20030910	spring type	300	4.12	7.26	SAMEA118758217
GB2_17577	TRI 22188	PRT	Southern Europe	20030910	spring type	300	2.58	4.26	SAMEA118758230
GB2_17599	TRI 22210	RUS	Eastern Europe	20030910	spring type	300	9.29	8.42	SAMEA118758250
GB2_17601	TRI 22212	DEU	Western Europe	20030910	spring type	500	11.29	11.06	SAMEA118758252
GB2_17713	TRI 22023	KEN	Eastern Africa	20030910	spring type	400	10.43	6.56	SAMEA118758347
GB2_17749	TRI 22246	RUS	Eastern Europe	20030911	spring type	300	8.08	10.26	SAMEA118758378
GB2_17937	TRI 22661	PRT	Southern Europe	20030915	spring type	300	2.62	1.61	SAMEA118758528
GB2_17998	TRI 22757	RUS	Eastern Europe	20030916	spring type	500	4.09	8.84	SAMEA118758576
GB2_18088	TRI 22997	NA	NA	20030917	spring type	400	3.81	5.69	SAMEA118758641
GB2_18097	TRI 23019	NZL	Australia and New Zealand	20030917	spring type	500	12.16	4.04	SAMEA118758648
GB2_18176	TRI 23155	NZL	Australia and New Zealand	20030918	spring type	400	4.58	2.99	SAMEA118758713
GB2_18186	TRI 23171	KEN	Eastern Africa	20030918	spring type	400	6.29	7.27	SAMEA118758722
GB2_18199	TRI 23187	IND	Southern Asia	20030918	spring type	300	7.81	2.89	SAMEA118758732
GB2_18210	TRI 23204	IND	Southern Asia	20030918	spring type	300	5.62	7.41	SAMEA118758740
GB2_18226	TRI 24162	NA	NA	20030929	spring type	500	6.51	10.88	SAMEA118758751
GB2_18315	TRI 23973	PAK	Southern Asia	20030926	spring type	300	7.58	8.69	SAMEA118758758
GB2_18316	TRI 23974	IND	Southern Asia	20030926	spring type	300	2.94	8.41	SAMEA118758816
GB2_18322	TRI 23809	TUR	Western Asia	20030924	spring type	400	5.62	6.26	SAMEA118758820
GB2_18332	TRI 23839	IND	Southern Asia	20030924	spring type	300	5.25	2.84	SAMEA118758829
GB2_18412	TRI 23275	IND	Southern Asia	20030918	spring type	300	5.45	7.55	SAMEA118758886
GB2_18429	TRI 23482	URY	South America	20030922	spring type	500	9.23	12.59	SAMEA118758898
GB2_18445	TRI 23493	USA	Northern America	20030922	spring type	500	2.51	7.69	SAMEA118758913
GB2_18460	TRI 23461	USA	Northern America	20030922	spring type	500	2.08	5.16	SAMEA118758928
GB2_18466	TRI 23474	USA	Northern America	20030922	spring type	300	6.81	8.26	SAMEA118758931
GB2_18560	TRI 23758	IND	Southern Asia	20030924	spring type	300	7.66	9.76	SAMEA118758991
GB2_18568	TRI 23755	PAK	Southern Asia	20030924	spring type	300	6.8	10.13	SAMEA118758998
GB2_18577	TRI 23505	USA	Northern America	20030922	spring type	400	7.52	7.12	SAMEA118759005
GB2_18595	TRI 23539	CHN	Eastern Asia	20030922	spring type	300	13.57	5.56	SAMEA118759016
GB2_18616	TRI 23625	URY	South America	20030923	spring type	400	5.66	7.88	SAMEA118759034
GB2_18618	TRI 23627	AUS	Australia and New Zealand	20030923	spring type	300	7.8	5.69	SAMEA118759036
GB2_18628	TRI 23650	AUS	Australia and New Zealand	20030923	spring type	500	6.62	2.98	SAMEA118759044
GB2_18643	TRI 23304	ETH	Eastern Africa	20030918	spring type	400	10.09	9.08	SAMEA118759057
GB2_19016	TRI 25310	NA	NA	20031015	spring type	400	5.78	4.18	SAMEA118759342
GB2_9652	TRI 1903	DEU	Western Europe	1947----	spring type	500	4.76	2.19	SAMEA118763893
GB2_9653	TRI 2652	CHN	Eastern Asia	1947----	spring type	300	5.09	4.19	SAMEA118763892
GB2_9654	TRI 2525	CHN	Eastern Asia	1947----	spring type	300	4.76	2.91	SAMEA118763891
GB2_9656	TRI 6114	IRN	Southern Asia	1959----	spring type	300	4.76	2.48	SAMEA118763889
GB2_9657	TRI 5402	NPL	Southern Asia	1947----	spring type	300	12.04	13.91	SAMEA118763888
GB2_9658	TRI 5685	IRN	Southern Asia	1959----	spring type	300	4.76	3.48	SAMEA118763887
GB2_9659	TRI 7972	ISR	Western Asia	1966----	spring type	500	4.76	10.05	SAMEA118763886
GB2_9660	TRI 5639	IRN	Southern Asia	1959----	spring type	300	4.76	2.19	SAMEA118763885
GB2_9661	TRI 5883	IRN	Southern Asia	1959----	spring type	300	25.33	3.19	SAMEA118763884
GB2_9662	TRI 8010	ARG	South America	1966----	spring type	500	4.76	3.62	SAMEA118763883
GB2_9663	TRI 3303	PRT	Southern Europe	1949----	spring type	500	6.33	5.34	SAMEA118763882
GB2_9664	TRI 2060	GRC	Southern Europe	1946----	spring type	300	7.37	5.34	SAMEA118763881
GB2_9665	TRI 3404	DEU	Western Europe	1950----	spring type	500	7.37	3.53	SAMEA118763880
GB2_9666	TRI 2871	CHN	Eastern Asia	1947----	spring type	300	13.8	2.48	SAMEA118763879
GB2_9667	TRI 2473	IND	Southern Asia	1947----	spring type	300	7.57	4.19	SAMEA118763878
GB2_9668	TRI 3542	IND	Southern Asia	1947----	spring type	300	20.97	2.19	SAMEA118763877
GB2_9669	TRI 2217	NLD	Western Europe	1947----	spring type	500	8.87	2.91	SAMEA118763876
GB2_9670	TRI 2672	AFG	Southern Asia	1947----	spring type	300	7.37	2.62	SAMEA118763875
GB2_9671	TRI 2553	AFG	Southern Asia	1947----	spring type	300	7.37	2.36	SAMEA118763874
GB2_9672	TRI 2607	NPL	Southern Asia	1947----	spring type	300	7.37	6.62	SAMEA118763873
GB2_9673	TRI 3924	CHN	Eastern Asia	1947----	spring type	300	7.37	4.66	SAMEA118763872
GB2_9674	TRI 3632	CHN	Eastern Asia	1947----	spring type	300	7.37	3.66	SAMEA118763871
GB2_9675	TRI 5683	IRN	Southern Asia	1959----	spring type	300	12.57	4.94	SAMEA118763870
GB2_9676	TRI 4152	ITA	Southern Europe	1952----	spring type	300	8.03	4.37	SAMEA118763869
GB2_9677	TRI 6123	IRN	Southern Asia	1959----	spring type	300	7.37	4.37	SAMEA118763868
GB2_9678	TRI 5748	IRN	Southern Asia	1959----	spring type	300	9.53	3.99	SAMEA118763867
GB2_9679	TRI 5852	IRN	Southern Asia	1959----	spring type	300	7.37	3.32	SAMEA118763866
GB2_9681	TRI 2676	CHN	Eastern Asia	1947----	spring type	100	11.94	4.66	SAMEA118763864
GB2_9682	TRI 2764	CHN	Eastern Asia	1947----	spring type	300	26.08	7.09	SAMEA118763863
GB2_9683	TRI 2820	AFG	Southern Asia	1947----	spring type	300	21.7	5.51	SAMEA118763862
GB2_9685	TRI 2643	NPL	Southern Asia	1947----	spring type	300	16.94	5.09	SAMEA118763860
GB2_9686	TRI 2567	CHN	Eastern Asia	1947----	spring type	300	9	4.37	SAMEA118763859
GB2_9687	TRI 2819	IND	Southern Asia	1947----	spring type	300	9	3.66	SAMEA118763858
GB2_9689	TRI 2624	AFG	Southern Asia	1947----	spring type	300	9	3.66	SAMEA118763856
GB2_9690	TRI 3148	GRC	Southern Europe	1949----	spring type	300	9	4.51	SAMEA118763855
GB2_9691	TRI 2787	AFG	Southern Asia	1947----	spring type	300	9	3.16	SAMEA118763854
GB2_9692	TRI 2798	CHN	Eastern Asia	1947----	spring type	300	9	2.99	SAMEA118763853
GB2_9693	TRI 3993	CHN	Eastern Asia	1947----	spring type	300	9	2.99	NA
GB2_9694	TRI 2265	ROU	Eastern Europe	1948----	spring type	300	9	4.09	SAMEA118763852
GB2_9695	TRI 4060	CAN	Northern America	1954----	spring type	500	9	2.66	SAMEA118763851
GB2_9696	TRI 2273	CHN	Eastern Asia	1946----	spring type	300	9	3.72	SAMEA118763850
GB2_9697	TRI 3420	DEU	Western Europe	1950----	spring type	500	9	6.87	SAMEA118763849
GB2_9698	TRI 3469	RUS	Eastern Europe	1950----	spring type	300	9	5.3	SAMEA118763848
GB2_9699	TRI 3444	DEU	Western Europe	1950----	spring type	500	9	4.87	SAMEA118763847
GB2_9700	TRI 4032	NA	NA	1949----	spring type	100	9	6.3	SAMEA118763846
GB2_9701	TRI 4039	NPL	Southern Asia	1951----	spring type	300	9	6.24	SAMEA118763845
GB2_9702	TRI 3187	CHN	Eastern Asia	1947----	spring type	300	9	5.84	SAMEA118763844
GB2_9703	TRI 2612	CHN	Eastern Asia	1947----	spring type	300	9	4.87	SAMEA118763843
GB2_9708	TRI 4140	ITA	Southern Europe	1951----	spring type	300	9	4.64	SAMEA118763839
GB2_9709	TRI 4325	NA	NA	1955----	spring type	300	9	6.3	SAMEA118763838
GB2_9710	TRI 4549	CHL	South America	1959----	spring type	NA	9	4.3	SAMEA118763837
GB2_9711	TRI 4033	CHN	Eastern Asia	1961----	spring type	300	2.73	4.72	SAMEA118763836
GB2_9712	TRI 3891	ITA	Southern Europe	1951----	spring type	500	2.39	2.44	SAMEA118763835
GB2_9713	TRI 2729	IND	Southern Asia	1947----	spring type	300	2.39	4.58	SAMEA118763834
GB2_9715	TRI 1956	DEU	Western Europe	1947----	spring type	500	2.39	1.44	SAMEA118763832
GB2_9716	TRI 4388	USA	Northern America	1956----	spring type	500	2.39	2.1	SAMEA118763831
GB2_9718	TRI 3554	CHN	Eastern Asia	1947----	spring type	300	2.39	2.87	SAMEA118763552
GB2_9719	TRI 2634	AFG	Southern Asia	1947----	spring type	300	2.39	2.94	SAMEA118763551
GB2_9720	TRI 2897	GRC	Southern Europe	1946----	spring type	300	3.23	1.44	SAMEA118763550
GB2_9721	TRI 7629	RUS	Eastern Europe	1965----	spring type	500	2.39	3.44	SAMEA118763549
GB2_9722	TRI 8194	ITA	Southern Europe	1966----	spring type	500	12.25	7.79	SAMEA118763548
GB2_9723	TRI 7635	RUS	Eastern Europe	1965----	spring type	500	2.39	5.07	SAMEA118763547
GB2_9724	TRI 6104	IRN	Southern Asia	1959----	spring type	300	2.39	3.36	SAMEA118763546
GB2_9725	TRI 7730	DEU	Western Europe	1965----	spring type	500	2.39	5.5	SAMEA118763545
GB2_9726	TRI 5792	IRN	Southern Asia	1959----	spring type	300	2.39	4.93	SAMEA118763544
GB2_9727	TRI 6986	FRA	Western Europe	1962----	spring type	500	2.39	4.98	SAMEA118763543
GB2_9728	TRI 5320	FIN	Northern Europe	1957----	spring type	500	2.39	6.65	SAMEA118763542
GB2_9729	TRI 7209	USA	Northern America	1964----	spring type	500	6.73	3.22	SAMEA118763541
GB2_9730	TRI 5357	GBR	Northern Europe	1957----	spring type	500	2.39	2.65	SAMEA118763540
GB2_9731	TRI 7241	AUS	Australia and New Zealand	1964----	spring type	500	2.39	2.22	SAMEA118763539
GB2_9732	TRI 5810	IRN	Southern Asia	1959----	spring type	300	4.56	2.65	SAMEA118763538

## Sheet: Supplementary Table S2
Supplementary Table S2: List of calculated MSD value based on P values for YR and LR.
Trait	Method	Model	MSD value
YR	GAPIT	CMLM+K+Q2	2.77389e-05
YR	GAPIT	CMLM+K+Q3	2.79678e-05
YR	GAPIT	CMLM+K	2.82096e-05
YR	FARMCPU		0.000132698
YR	TASSEL	CMLM+K+Q3	0.000134495
YR	TASSEL	CMLM+K+Q2	0.000136889
YR	GenAble		0.00242612
YR	TASSEL	CMLM+K	0.342495
LR	GAPIT	CMLM+K	4.20648e-06
LR	GAPIT	CMLM+K+Q2	4.70753e-06
LR	GAPIT	CMLM+K+Q3	4.74486e-06
LR	GenAble		3.48533e-05
LR	FARMCPU		0.000336731
LR	TASSEL	CMLM+K	0.000352529
LR	TASSEL	CMLM+K+Q3	0.000510958
LR	TASSEL	CMLM+K+Q2	0.000512269

## Sheet: Supplementary Table S3
Supplementary Table S3: List of all identified markers using TASSEL, GAPIT, FARMCPU and GenAble for YR and LR.
Trait	Method	model	SNP	Chr	Pos	P.value	LOD	MAF	H&B.P.Value	Effect	R2	R2_percent
YR	Gapit	Q3+K	Chr1A_5243768	1A	5243768	0.000628982	3.20136	0.0395665	0.289366	1.92669
YR	Gapit	Q3+K	Chr1A_5243976	1A	5243976	0.000740988	3.13019	0.0393145	0.289366	1.89926
YR	Gapit	Q3+K	Chr1A_5244056	1A	5244056	0.000116203	3.93478	0.0340222	0.28714	2.31568
YR	Gapit	Q3+K	Chr1A_66978347	1A	66978347	0.000401875	3.39591	0.0143649	0.28714	3.22349
YR	Gapit	Q3+K	Chr1A_74165120	1A	74165120	0.000401875	3.39591	0.0143649	0.28714	3.22349
YR	Gapit	Q3+K	Chr1A_299465370	1A	299465370	0.000846037	3.07261	0.0138609	0.304314	2.9454
YR	Gapit	Q3+K	Chr1D_6979967	1D	6979967	0.000476772	3.32169	0.0120968	0.289366	3.42602
YR	Gapit	Q3+K	Chr1D_8677328	1D	8677328	0.000203795	3.69081	0.297631	0.28714	0.936225
YR	Gapit	Q3+K	Chr1D_8802655	1D	8802655	0.000309857	3.50884	0.292339	0.28714	0.915527
YR	Gapit	Q3+K	Chr1D_8802671	1D	8802671	0.000309857	3.50884	0.292339	0.28714	0.915527
YR	Gapit	Q3+K	Chr1D_8802672	1D	8802672	0.000309857	3.50884	0.292339	0.28714	0.915527
YR	Gapit	Q3+K	Chr1D_8802726	1D	8802726	0.000309857	3.50884	0.292339	0.28714	0.915527
YR	Gapit	Q3+K	Chr1D_8874957	1D	8874957	0.000285407	3.54454	0.292087	0.28714	0.919685
YR	Gapit	Q3+K	Chr1D_8874972	1D	8874972	0.000285407	3.54454	0.292087	0.28714	0.919685
YR	Gapit	Q3+K	Chr1D_8874976	1D	8874976	0.000260562	3.58409	0.292591	0.28714	0.923962
YR	Gapit	Q3+K	Chr1D_8875018	1D	8875018	0.000285407	3.54454	0.292087	0.28714	0.919685
YR	Gapit	Q3+K	Chr1D_8875030	1D	8875030	0.000285407	3.54454	0.292087	0.28714	0.919685
YR	Gapit	Q3+K	Chr1D_17092465	1D	17092465	0.000176265	3.75383	0.0183972	0.28714	4.07993
YR	Gapit	Q3+K	Chr1D_17092468	1D	17092468	0.000176265	3.75383	0.0183972	0.28714	4.07993
YR	Gapit	Q3+K	Chr1D_17092475	1D	17092475	0.000176265	3.75383	0.0183972	0.28714	4.07993
YR	Gapit	Q3+K	Chr1D_17092526	1D	17092526	0.000176265	3.75383	0.0183972	0.28714	4.07993
YR	Gapit	Q3+K	Chr1D_396173893	1D	396173893	0.000197833	3.7037	0.0103327	0.28714	3.67274
YR	Gapit	Q3+K	Chr1D_465452375	1D	465452375	0.000762815	3.11758	0.0143649	0.289366	-5.37199
YR	Gapit	Q3+K	Chr1D_479896479	1D	479896479	0.000827359	3.08231	0.0894657	0.301195	-1.25377
YR	Gapit	Q3+K	Chr1D_480103702	1D	480103702	0.000302306	3.51955	0.0660282	0.28714	-1.62393
YR	Gapit	Q3+K	Chr1D_480734050	1D	480734050	0.000427433	3.36913	0.0652722	0.28714	-1.59707
YR	Gapit	Q3+K	Chr2A_41309534	2A	41309534	0.000319125	3.49604	0.0194052	0.28714	3.39381
YR	Gapit	Q3+K	Chr2A_138533959	2A	138533959	0.000819771	3.08631	0.0133569	0.299641	-3.62406
YR	Gapit	Q3+K	Chr2A_160193315	2A	160193315	0.000220324	3.65694	0.0108367	0.28714	-4.25747
YR	Gapit	Q3+K	Chr2A_207786406	2A	207786406	0.000505185	3.29655	0.0141129	0.289366	3.27798
YR	Gapit	Q3+K	Chr2A_207846155	2A	207846155	0.000532725	3.2735	0.0141129	0.289366	3.45241
YR	Gapit	Q3+K	Chr2A_510841913	2A	510841913	0.000412591	3.38448	0.451865	0.28714	0.993679
YR	Gapit	Q3+K	Chr2A_510880388	2A	510880388	0.000312548	3.50508	0.452369	0.28714	1.00819
YR	Gapit	Q3+K	Chr2A_514744558	2A	514744558	0.000815295	3.08869	0.0599798	0.299217	1.77186
YR	Gapit	Q3+K	Chr2A_745764807	2A	745764807	0.000500346	3.30073	0.49874	0.289366	0.914642
YR	Gapit	Q3+K	Chr2B_8071137	2B	8071137	0.00026467	3.5773	0.0105847	0.28714	3.27148
YR	Gapit	Q3+K	Chr2B_8093673	2B	8093673	0.00026467	3.5773	0.0105847	0.28714	3.27148
YR	Gapit	Q3+K	Chr2B_51827247	2B	51827247	0.000750575	3.12461	0.119204	0.289366	-1.2999
YR	Gapit	Q3+K	Chr2B_85310692	2B	85310692	7.64522e-05	4.11661	0.0131048	0.28714	3.53818
YR	Gapit	Q3+K	Chr2B_618602064	2B	618602064	0.000641368	3.19289	0.309728	0.289366	-1.12278
YR	Gapit	Q3+K	Chr2B_621920182	2B	621920182	0.000688222	3.16227	0.293599	0.289366	-1.11574
YR	Gapit	Q3+K	Chr2B_621927514	2B	621927514	0.000680744	3.16702	0.297883	0.289366	-1.10787
YR	Gapit	Q3+K	Chr2B_622947360	2B	622947360	0.000675178	3.17058	0.242188	0.289366	-1.27857
YR	Gapit	Q3+K	Chr2B_660133069	2B	660133069	0.000123897	3.90694	0.0216734	0.28714	2.70089
YR	Gapit	Q3+K	Chr2B_686633913	2B	686633913	0.000724876	3.13974	0.0166331	0.289366	-2.50604
YR	Gapit	Q3+K	Chr2B_686633915	2B	686633915	0.000724876	3.13974	0.0166331	0.289366	-2.50604
YR	Gapit	Q3+K	Chr2B_686633959	2B	686633959	0.000724876	3.13974	0.0166331	0.289366	-2.50604
YR	Gapit	Q3+K	Chr2B_686689506	2B	686689506	0.000405239	3.39229	0.0241935	0.28714	-2.29838
YR	Gapit	Q3+K	Chr2B_686689507	2B	686689507	0.000405239	3.39229	0.0241935	0.28714	-2.29838
YR	Gapit	Q3+K	Chr2B_686689522	2B	686689522	0.000724876	3.13974	0.0166331	0.289366	-2.50604
YR	Gapit	Q3+K	Chr2B_686689536	2B	686689536	0.000405239	3.39229	0.0241935	0.28714	-2.29838
YR	Gapit	Q3+K	Chr2B_686689591	2B	686689591	0.000724876	3.13974	0.0166331	0.289366	-2.50604
YR	Gapit	Q3+K	Chr2B_686689602	2B	686689602	0.000405239	3.39229	0.0241935	0.28714	-2.29838
YR	Gapit	Q3+K	Chr2B_686689621	2B	686689621	0.000759037	3.11974	0.0244456	0.289366	-2.17929
YR	Gapit	Q3+K	Chr2B_686689639	2B	686689639	0.000759037	3.11974	0.0244456	0.289366	-2.17929
YR	Gapit	Q3+K	Chr2B_686689648	2B	686689648	0.000724876	3.13974	0.0166331	0.289366	-2.50604
YR	Gapit	Q3+K	Chr2B_686689678	2B	686689678	0.000759037	3.11974	0.0244456	0.289366	-2.17929
YR	Gapit	Q3+K	Chr2B_686689846	2B	686689846	0.000724876	3.13974	0.0166331	0.289366	-2.50604
YR	Gapit	Q3+K	Chr2B_686689874	2B	686689874	0.000724876	3.13974	0.0166331	0.289366	-2.50604
YR	Gapit	Q3+K	Chr2B_686689922	2B	686689922	0.000405239	3.39229	0.0241935	0.28714	-2.29838
YR	Gapit	Q3+K	Chr2B_686689946	2B	686689946	0.000724876	3.13974	0.0166331	0.289366	-2.50604
YR	Gapit	Q3+K	Chr2B_686689979	2B	686689979	0.000724876	3.13974	0.0166331	0.289366	-2.50604
YR	Gapit	Q3+K	Chr2B_686690000	2B	686690000	0.000724876	3.13974	0.0166331	0.289366	-2.50604
YR	Gapit	Q3+K	Chr2B_686690001	2B	686690001	0.000724876	3.13974	0.0166331	0.289366	-2.50604
YR	Gapit	Q3+K	Chr2B_686690024	2B	686690024	0.000762063	3.11801	0.0168851	0.289366	-2.48473
YR	Gapit	Q3+K	Chr2B_686690078	2B	686690078	0.000724876	3.13974	0.0166331	0.289366	-2.50604
YR	Gapit	Q3+K	Chr2B_686764793	2B	686764793	0.000724876	3.13974	0.0166331	0.289366	-2.50604
YR	Gapit	Q3+K	Chr2B_686764817	2B	686764817	0.000724876	3.13974	0.0166331	0.289366	-2.50604
YR	Gapit	Q3+K	Chr2B_686764838	2B	686764838	0.000724876	3.13974	0.0166331	0.289366	-2.50604
YR	Gapit	Q3+K	Chr2B_687135465	2B	687135465	0.000724876	3.13974	0.0166331	0.289366	-2.50604
YR	Gapit	Q3+K	Chr2B_687785064	2B	687785064	0.000724876	3.13974	0.0166331	0.289366	-2.50604
YR	Gapit	Q3+K	Chr2B_687785127	2B	687785127	0.000724876	3.13974	0.0166331	0.289366	-2.50604
YR	Gapit	Q3+K	Chr2B_784670487	2B	784670487	0.000319041	3.49615	0.0350302	0.28714	2.09234
YR	Gapit	Q3+K	Chr2D_3008734	2D	3008734	0.000339948	3.46859	0.0556956	0.28714	2.15203
YR	Gapit	Q3+K	Chr2D_3008757	2D	3008757	0.000339948	3.46859	0.0556956	0.28714	2.15203
YR	Gapit	Q3+K	Chr2D_3010397	2D	3010397	0.000345279	3.46183	0.0554435	0.28714	2.1575
YR	Gapit	Q3+K	Chr2D_3148633	2D	3148633	0.000597167	3.2239	0.0556956	0.289366	2.05455
YR	Gapit	Q3+K	Chr2D_4244399	2D	4244399	0.000979587	3.00896	0.0556956	0.324004	1.99707
YR	Gapit	Q3+K	Chr2D_4250988	2D	4250988	0.000677583	3.16904	0.0554435	0.289366	2.05594
YR	Gapit	Q3+K	Chr2D_4328721	2D	4328721	0.000746019	3.12725	0.0556956	0.289366	2.04304
YR	Gapit	Q3+K	Chr2D_4414641	2D	4414641	0.000438901	3.35763	0.0554435	0.28714	2.12179
YR	Gapit	Q3+K	Chr2D_4414644	2D	4414644	0.000438901	3.35763	0.0554435	0.28714	2.12179
YR	Gapit	Q3+K	Chr2D_4414669	2D	4414669	0.000438901	3.35763	0.0554435	0.28714	2.12179
YR	Gapit	Q3+K	Chr2D_4414680	2D	4414680	0.000438901	3.35763	0.0554435	0.28714	2.12179
YR	Gapit	Q3+K	Chr2D_4414704	2D	4414704	0.000438901	3.35763	0.0554435	0.28714	2.12179
YR	Gapit	Q3+K	Chr2D_4548077	2D	4548077	0.000438901	3.35763	0.0554435	0.28714	2.12179
YR	Gapit	Q3+K	Chr2D_5422939	2D	5422939	0.00096506	3.01545	0.0579637	0.324004	2.07278
YR	Gapit	Q3+K	Chr2D_5423014	2D	5423014	0.00096506	3.01545	0.0579637	0.324004	2.07278
YR	Gapit	Q3+K	Chr2D_54598441	2D	54598441	0.000919642	3.03638	0.0211694	0.318115	-2.29408
YR	Gapit	Q3+K	Chr2D_105395604	2D	105395604	0.00015662	3.80515	0.0554435	0.28714	2.06835
YR	Gapit	Q3+K	Chr2D_105402320	2D	105402320	5.74928e-05	4.24039	0.0554435	0.28714	2.19169
YR	Gapit	Q3+K	Chr2D_105402478	2D	105402478	1.93932e-05	4.71235	0.0559476	0.180132	2.32465
YR	Gapit	Q3+K	Chr2D_105495462	2D	105495462	9.18385e-05	4.03698	0.0556956	0.28714	2.12713
YR	Gapit	Q3+K	Chr2D_107244031	2D	107244031	0.00096952	3.01344	0.0360383	0.324004	2.14534
YR	Gapit	Q3+K	Chr2D_109021782	2D	109021782	0.000186862	3.72848	0.0582157	0.28714	2.02063
YR	Gapit	Q3+K	Chr2D_109305872	2D	109305872	8.15825e-05	4.0884	0.0393145	0.28714	2.45432
YR	Gapit	Q3+K	Chr2D_566342964	2D	566342964	1.09061e-05	4.96233	0.0244456	0.180132	3.66148
YR	Gapit	Q3+K	Chr2D_567416795	2D	567416795	0.000101108	3.99521	0.0241935	0.28714	3.08257
YR	Gapit	Q3+K	Chr3A_652159619	3A	652159619	0.000904103	3.04378	0.0103327	0.317238	-4.00371
YR	Gapit	Q3+K	Chr3A_702690366	3A	702690366	0.00062924	3.20118	0.0715726	0.289366	-1.62714
YR	Gapit	Q3+K	Chr3A_702690429	3A	702690429	0.00062924	3.20118	0.0715726	0.289366	-1.62714
YR	Gapit	Q3+K	Chr3A_703039504	3A	703039504	0.000937924	3.02783	0.077621	0.323201	-1.45946
YR	Gapit	Q3+K	Chr3A_703052978	3A	703052978	0.000866563	3.0622	0.078125	0.306807	-1.46727
YR	Gapit	Q3+K	Chr3B_15766879	3B	15766879	0.000163666	3.78604	0.333417	0.28714	0.935808
YR	Gapit	Q3+K	Chr3B_17069609	3B	17069609	0.000644751	3.19061	0.206149	0.289366	1.04778
YR	Gapit	Q3+K	Chr3B_17733886	3B	17733886	0.000812262	3.0903	0.212954	0.299217	1.03343
YR	Gapit	Q3+K	Chr3B_19006347	3B	19006347	0.000473581	3.32461	0.250756	0.289366	1.00508
YR	Gapit	Q3+K	Chr3B_764127588	3B	764127588	7.53092e-05	4.12315	0.0249496	0.28714	-3.208
YR	Gapit	Q3+K	Chr3B_765267793	3B	765267793	9.46115e-06	5.02406	0.0844254	0.180132	-2.00865
YR	Gapit	Q3+K	Chr3B_765357465	3B	765357465	0.000836358	3.07761	0.443548	0.302036	-0.788716
YR	Gapit	Q3+K	Chr3B_765485512	3B	765485512	0.000300655	3.52193	0.207661	0.28714	-1.01071
YR	Gapit	Q3+K	Chr3B_775725600	3B	775725600	0.000610929	3.21401	0.172883	0.289366	-1.08346
YR	Gapit	Q3+K	Chr3B_775739818	3B	775739818	0.000715498	3.14539	0.173135	0.289366	-1.07119
YR	Gapit	Q3+K	Chr3B_775739847	3B	775739847	0.000715498	3.14539	0.173135	0.289366	-1.07119
YR	Gapit	Q3+K	Chr3B_775739861	3B	775739861	0.000715498	3.14539	0.173135	0.289366	-1.07119
YR	Gapit	Q3+K	Chr3D_7327254	3D	7327254	0.000986986	3.00569	0.016129	0.324004	-2.57216
YR	Gapit	Q3+K	Chr3D_7327259	3D	7327259	0.000986986	3.00569	0.016129	0.324004	-2.57216
YR	Gapit	Q3+K	Chr3D_7327274	3D	7327274	0.000986986	3.00569	0.016129	0.324004	-2.57216
YR	Gapit	Q3+K	Chr3D_7327300	3D	7327300	0.000986986	3.00569	0.016129	0.324004	-2.57216
YR	Gapit	Q3+K	Chr3D_18704363	3D	18704363	0.000793131	3.10065	0.0415827	0.298359	-2.09495
YR	Gapit	Q3+K	Chr3D_68538271	3D	68538271	0.000808337	3.09241	0.0123488	0.299095	4.86543
YR	Gapit	Q3+K	Chr3D_68538277	3D	68538277	0.000351947	3.45352	0.0146169	0.28714	4.68956
YR	Gapit	Q3+K	Chr3D_68538288	3D	68538288	0.000808337	3.09241	0.0123488	0.299095	4.86543
YR	Gapit	Q3+K	Chr3D_68538310	3D	68538310	0.000351947	3.45352	0.0146169	0.28714	4.68956
YR	Gapit	Q3+K	Chr3D_129986014	3D	129986014	0.0003655	3.43711	0.0113407	0.28714	-3.14383
YR	Gapit	Q3+K	Chr3D_334057584	3D	334057584	0.000504913	3.29678	0.0110887	0.289366	4.81309
YR	Gapit	Q3+K	Chr3D_531010129	3D	531010129	0.000604805	3.21838	0.0168851	0.289366	4.20006
YR	Gapit	Q3+K	Chr3D_532779488	3D	532779488	0.000205572	3.68704	0.0176411	0.28714	-3.33595
YR	Gapit	Q3+K	Chr3D_577862715	3D	577862715	0.000974104	3.01139	0.0166331	0.324004	3.27891
YR	Gapit	Q3+K	Chr4A_105731131	4A	105731131	0.000270009	3.56862	0.316532	0.28714	1.11671
YR	Gapit	Q3+K	Chr4A_106283145	4A	106283145	0.000454152	3.3428	0.31754	0.289366	1.0737
YR	Gapit	Q3+K	Chr4A_106876726	4A	106876726	0.000139798	3.8545	0.316784	0.28714	1.16666
YR	Gapit	Q3+K	Chr4A_107917148	4A	107917148	0.000225556	3.64675	0.315524	0.28714	1.12884
YR	Gapit	Q3+K	Chr4A_107917166	4A	107917166	0.000225556	3.64675	0.315524	0.28714	1.12884
YR	Gapit	Q3+K	Chr4A_109152133	4A	109152133	0.000279407	3.55376	0.318044	0.28714	1.11443
YR	Gapit	Q3+K	Chr4A_110799250	4A	110799250	0.000247476	3.60647	0.318044	0.28714	1.12026
YR	Gapit	Q3+K	Chr4A_110976029	4A	110976029	0.000131739	3.88028	0.317288	0.28714	1.17216
YR	Gapit	Q3+K	Chr4A_113413969	4A	113413969	0.000475955	3.32243	0.333165	0.289366	1.04381
YR	Gapit	Q3+K	Chr4A_113486925	4A	113486925	0.000517787	3.28585	0.330393	0.289366	1.0435
YR	Gapit	Q3+K	Chr4A_113486926	4A	113486926	0.000517787	3.28585	0.330393	0.289366	1.0435
YR	Gapit	Q3+K	Chr4A_113514741	4A	113514741	0.000344969	3.46222	0.330645	0.28714	1.07717
YR	Gapit	Q3+K	Chr4A_114398304	4A	114398304	0.000996411	3.00156	0.336694	0.324004	0.988663
YR	Gapit	Q3+K	Chr4A_114629938	4A	114629938	0.000717677	3.14407	0.33745	0.289366	1.01782
YR	Gapit	Q3+K	Chr4A_114630018	4A	114630018	0.000717677	3.14407	0.33745	0.289366	1.01782
YR	Gapit	Q3+K	Chr4A_612892487	4A	612892487	0.000316176	3.50007	0.016381	0.28714	2.61431
YR	Gapit	Q3+K	Chr4A_613114008	4A	613114008	0.000186973	3.72822	0.0128528	0.28714	-3.60631
YR	Gapit	Q3+K	Chr4A_613114044	4A	613114044	5.47984e-05	4.26123	0.0128528	0.28714	-3.92372
YR	Gapit	Q3+K	Chr4A_613114089	4A	613114089	0.000133852	3.87338	0.0126008	0.28714	-3.769
YR	Gapit	Q3+K	Chr4A_619447808	4A	619447808	0.000302863	3.51875	0.016129	0.28714	3.28816
YR	Gapit	Q3+K	Chr4B_115985523	4B	115985523	0.000489282	3.31044	0.0128528	0.289366	2.87031
YR	Gapit	Q3+K	Chr4D_501311056	4D	501311056	0.000445662	3.35099	0.0637601	0.287398	2.44152
YR	Gapit	Q3+K	Chr4D_502187493	4D	502187493	0.000906564	3.0426	0.0645161	0.317238	2.31633
YR	Gapit	Q3+K	Chr4D_502187502	4D	502187502	0.000906564	3.0426	0.0645161	0.317238	2.31633
YR	Gapit	Q3+K	Chr4D_502198503	4D	502198503	0.000833344	3.07918	0.0647681	0.302036	2.31361
YR	Gapit	Q3+K	Chr4D_502198515	4D	502198515	0.000911228	3.04037	0.0650202	0.317638	2.2856
YR	Gapit	Q3+K	Chr4D_502885273	4D	502885273	0.00033518	3.47472	0.0650202	0.28714	2.51263
YR	Gapit	Q3+K	Chr4D_502911285	4D	502911285	0.000242027	3.61614	0.0642641	0.28714	2.56511
YR	Gapit	Q3+K	Chr4D_502911290	4D	502911290	0.000242027	3.61614	0.0642641	0.28714	2.56511
YR	Gapit	Q3+K	Chr4D_502911302	4D	502911302	0.000242027	3.61614	0.0642641	0.28714	2.56511
YR	Gapit	Q3+K	Chr4D_502911314	4D	502911314	0.000242027	3.61614	0.0642641	0.28714	2.56511
YR	Gapit	Q3+K	Chr4D_503101966	4D	503101966	0.00033518	3.47472	0.0650202	0.28714	2.51263
YR	Gapit	Q3+K	Chr4D_503102006	4D	503102006	0.000291137	3.5359	0.0645161	0.28714	2.53126
YR	Gapit	Q3+K	Chr4D_503102037	4D	503102037	0.000407097	3.3903	0.0647681	0.28714	2.47684
YR	Gapit	Q3+K	Chr4D_503201419	4D	503201419	0.000517903	3.28575	0.0677923	0.289366	2.39061
YR	Gapit	Q3+K	Chr4D_503201433	4D	503201433	0.000598946	3.22261	0.0650202	0.289366	2.41231
YR	Gapit	Q3+K	Chr4D_503201435	4D	503201435	0.000432223	3.36429	0.0647681	0.28714	2.46646
YR	Gapit	Q3+K	Chr4D_503201461	4D	503201461	0.000598946	3.22261	0.0650202	0.289366	2.41231
YR	Gapit	Q3+K	Chr4D_503201467	4D	503201467	0.000598946	3.22261	0.0650202	0.289366	2.41231
YR	Gapit	Q3+K	Chr4D_503201470	4D	503201470	0.000432223	3.36429	0.0647681	0.28714	2.46646
YR	Gapit	Q3+K	Chr4D_503201501	4D	503201501	0.000598946	3.22261	0.0650202	0.289366	2.41231
YR	Gapit	Q3+K	Chr4D_503272494	4D	503272494	0.000432223	3.36429	0.0647681	0.28714	2.46646
YR	Gapit	Q3+K	Chr4D_503272498	4D	503272498	0.000432223	3.36429	0.0647681	0.28714	2.46646
YR	Gapit	Q3+K	Chr4D_503272510	4D	503272510	0.000432223	3.36429	0.0647681	0.28714	2.46646
YR	Gapit	Q3+K	Chr4D_503272512	4D	503272512	0.000432223	3.36429	0.0647681	0.28714	2.46646
YR	Gapit	Q3+K	Chr4D_503272519	4D	503272519	0.000432223	3.36429	0.0647681	0.28714	2.46646
YR	Gapit	Q3+K	Chr4D_503272543	4D	503272543	0.000432223	3.36429	0.0647681	0.28714	2.46646
YR	Gapit	Q3+K	Chr4D_503272548	4D	503272548	0.000432223	3.36429	0.0647681	0.28714	2.46646
YR	Gapit	Q3+K	Chr4D_503293465	4D	503293465	0.000688444	3.16213	0.0652722	0.289366	2.35697
YR	Gapit	Q3+K	Chr4D_503293514	4D	503293514	0.000688444	3.16213	0.0652722	0.289366	2.35697
YR	Gapit	Q3+K	Chr4D_503293723	4D	503293723	0.000355694	3.44892	0.0650202	0.28714	2.5027
YR	Gapit	Q3+K	Chr4D_503293724	4D	503293724	0.000355694	3.44892	0.0650202	0.28714	2.5027
YR	Gapit	Q3+K	Chr4D_509604941	4D	509604941	1.90299e-05	4.72056	0.047631	0.180132	-2.47329
YR	Gapit	Q3+K	Chr5A_10259146	5A	10259146	0.000862332	3.06433	0.0294859	0.306512	2.44
YR	Gapit	Q3+K	Chr5A_297258780	5A	297258780	0.000714863	3.14578	0.014869	0.289366	3.98934
YR	Gapit	Q3+K	Chr5A_297258808	5A	297258808	0.000412844	3.38421	0.015373	0.28714	4.03287
YR	Gapit	Q3+K	Chr5A_297258831	5A	297258831	0.000513001	3.28988	0.015121	0.289366	4.09755
YR	Gapit	Q3+K	Chr5A_297258832	5A	297258832	0.000513001	3.28988	0.015121	0.289366	4.09755
YR	Gapit	Q3+K	Chr5B_15572238	5B	15572238	0.000317973	3.49761	0.0398185	0.28714	-2.00141
YR	Gapit	Q3+K	Chr5B_107135324	5B	107135324	0.000133032	3.87604	0.0110887	0.28714	-3.85231
YR	Gapit	Q3+K	Chr5B_467171844	5B	467171844	0.000195253	3.7094	0.0178931	0.28714	-3.18639
YR	Gapit	Q3+K	Chr5B_469983889	5B	469983889	0.000631394	3.1997	0.0115927	0.289366	-3.8479
YR	Gapit	Q3+K	Chr5B_480869458	5B	480869458	0.00085427	3.0684	0.0110887	0.304846	3.60297
YR	Gapit	Q3+K	Chr5B_494031044	5B	494031044	1.88934e-05	4.72369	0.0186492	0.180132	3.92564
YR	Gapit	Q3+K	Chr5B_559448016	5B	559448016	0.000338651	3.47025	0.333165	0.28714	0.888488
YR	Gapit	Q3+K	Chr5B_560252193	5B	560252193	0.000968429	3.01393	0.256804	0.324004	0.873508
YR	Gapit	Q3+K	Chr5B_560386882	5B	560386882	0.000405608	3.39189	0.25378	0.28714	0.93724
YR	Gapit	Q3+K	Chr5B_600719540	5B	600719540	0.000670078	3.17387	0.0642641	0.289366	1.65035
YR	Gapit	Q3+K	Chr5B_673946161	5B	673946161	0.000543654	3.26468	0.032006	0.289366	2.2221
YR	Gapit	Q3+K	Chr5B_686472491	5B	686472491	0.00022191	3.65382	0.0360383	0.28714	-1.98157
YR	Gapit	Q3+K	Chr5B_700296049	5B	700296049	0.00066511	3.17711	0.135081	0.289366	-1.13308
YR	Gapit	Q3+K	Chr5B_700468134	5B	700468134	0.00066511	3.17711	0.135081	0.289366	-1.13308
YR	Gapit	Q3+K	Chr5B_700685245	5B	700685245	0.00024647	3.60824	0.142641	0.28714	-1.21963
YR	Gapit	Q3+K	Chr5B_700686104	5B	700686104	0.000645331	3.19022	0.144909	0.289366	-1.12304
YR	Gapit	Q3+K	Chr5B_700686116	5B	700686116	0.000192123	3.71642	0.145917	0.28714	-1.22063
YR	Gapit	Q3+K	Chr5B_700686132	5B	700686132	0.000201263	3.69624	0.143145	0.28714	-1.23393
YR	Gapit	Q3+K	Chr5D_342090866	5D	342090866	3.32868e-06	5.47773	0.0100806	0.100175	-5.34065
YR	Gapit	Q3+K	Chr6A_619646881	6A	619646881	0.000209782	3.67823	0.0191532	0.28714	-2.80198
YR	Gapit	Q3+K	Chr6B_25934169	6B	25934169	0.000293137	3.53293	0.0189012	0.28714	3.57952
YR	Gapit	Q3+K	Chr6B_51649618	6B	51649618	0.000149277	3.82601	0.184224	0.28714	1.25933
YR	Gapit	Q3+K	Chr6B_51649666	6B	51649666	0.000149277	3.82601	0.184224	0.28714	1.25933
YR	Gapit	Q3+K	Chr6B_51650180	6B	51650180	0.00031995	3.49492	0.183972	0.28714	1.1942
YR	Gapit	Q3+K	Chr6B_51650219	6B	51650219	0.00031995	3.49492	0.183972	0.28714	1.1942
YR	Gapit	Q3+K	Chr6B_51650260	6B	51650260	0.00031995	3.49492	0.183972	0.28714	1.1942
YR	Gapit	Q3+K	Chr6B_51650326	6B	51650326	0.000157641	3.80233	0.18498	0.28714	1.25321
YR	Gapit	Q3+K	Chr6B_52150008	6B	52150008	0.000204508	3.68929	0.18624	0.28714	1.22078
YR	Gapit	Q3+K	Chr6B_52248108	6B	52248108	0.000745715	3.12743	0.120968	0.289366	1.28946
YR	Gapit	Q3+K	Chr6B_52248171	6B	52248171	0.000681164	3.16675	0.120968	0.289366	1.297
YR	Gapit	Q3+K	Chr6B_52283399	6B	52283399	0.000285517	3.54437	0.194556	0.28714	1.1752
YR	Gapit	Q3+K	Chr6B_52377160	6B	52377160	0.000394174	3.40431	0.186492	0.28714	1.16617
YR	Gapit	Q3+K	Chr6B_52384805	6B	52384805	0.000461978	3.33538	0.186744	0.289366	1.14833
YR	Gapit	Q3+K	Chr6B_52384841	6B	52384841	0.000461978	3.33538	0.186744	0.289366	1.14833
YR	Gapit	Q3+K	Chr6B_52384858	6B	52384858	0.000520045	3.28396	0.187248	0.289366	1.13556
YR	Gapit	Q3+K	Chr6B_54140004	6B	54140004	0.00080057	3.0966	0.18624	0.298669	1.10354
YR	Gapit	Q3+K	Chr6B_54160384	6B	54160384	0.000564233	3.24854	0.185988	0.289366	1.13603
YR	Gapit	Q3+K	Chr6B_54841657	6B	54841657	0.000166315	3.77907	0.182208	0.28714	1.24788
YR	Gapit	Q3+K	Chr6B_243663920	6B	243663920	0.000192214	3.71621	0.0302419	0.28714	-3.56417
YR	Gapit	Q3+K	Chr6B_452580801	6B	452580801	0.000975042	3.01098	0.0146169	0.324004	3.92941
YR	Gapit	Q3+K	Chr6B_507187987	6B	507187987	0.000146733	3.83347	0.0146169	0.28714	-3.87961
YR	Gapit	Q3+K	Chr6B_650930627	6B	650930627	1.95964e-05	4.70782	0.0126008	0.180132	-4.85565
YR	Gapit	Q3+K	Chr6D_4486122	6D	4486122	1.99519e-05	4.70002	0.0168851	0.180132	3.57489
YR	Gapit	Q3+K	Chr6D_5258435	6D	5258435	0.000154458	3.81119	0.0143649	0.28714	3.37057
YR	Gapit	Q3+K	Chr6D_9308215	6D	9308215	0.000740038	3.13075	0.0257056	0.289366	-2.38391
YR	Gapit	Q3+K	Chr6D_9308218	6D	9308218	0.000740038	3.13075	0.0257056	0.289366	-2.38391
YR	Gapit	Q3+K	Chr6D_33049623	6D	33049623	1.13572e-06	5.94473	0.0113407	0.0512682	-5.19376
YR	Gapit	Q3+K	Chr6D_33049631	6D	33049631	1.13572e-06	5.94473	0.0113407	0.0512682	-5.19376
YR	Gapit	Q3+K	Chr6D_486187465	6D	486187465	0.000569416	3.24457	0.0572077	0.289366	1.77768
YR	Gapit	Q3+K	Chr6D_486187479	6D	486187479	0.000569416	3.24457	0.0572077	0.289366	1.77768
YR	Gapit	Q3+K	Chr6D_492676751	6D	492676751	0.000557208	3.25398	0.0650202	0.289366	1.82107
YR	Gapit	Q3+K	Chr6D_492678805	6D	492678805	0.00061644	3.21011	0.0642641	0.289366	1.81822
YR	Gapit	Q3+K	Chr7A_34099771	7A	34099771	0.000530965	3.27493	0.427167	0.289366	-0.83608
YR	Gapit	Q3+K	Chr7A_34980405	7A	34980405	0.000693769	3.15879	0.436744	0.289366	-0.801013
YR	Gapit	Q3+K	Chr7A_528686887	7A	528686887	0.000797602	3.09821	0.0272177	0.298669	-2.23014
YR	Gapit	Q3+K	Chr7A_530893173	7A	530893173	0.000696172	3.15728	0.0277218	0.289366	-2.23762
YR	Gapit	Q3+K	Chr7A_539915120	7A	539915120	0.000751316	3.12418	0.0282258	0.289366	-2.2052
YR	Gapit	Q3+K	Chr7B_12645319	7B	12645319	0.000489635	3.31013	0.146169	0.289366	-1.0665
YR	Gapit	Q3+K	Chr7B_29648389	7B	29648389	0.000477228	3.32127	0.0126008	0.289366	-3.81607
YR	Gapit	Q3+K	Chr7B_29782994	7B	29782994	0.000849916	3.07062	0.0146169	0.304496	-3.79486
YR	Gapit	Q3+K	Chr7B_67147138	7B	67147138	0.000379315	3.421	0.0136089	0.28714	-3.61924
YR	Gapit	Q3+K	Chr7B_648260082	7B	648260082	0.000147526	3.83113	0.0138609	0.28714	-4.00183
YR	Gapit	Q3+K	Chr7B_694012402	7B	694012402	0.000248653	3.60441	0.0123488	0.28714	3.6962
YR	Gapit	Q3+K	Chr7D_107316169	7D	107316169	0.000291525	3.53532	0.0234375	0.28714	-2.41773
YR	Gapit	Q3+K	Chr7D_468027804	7D	468027804	0.000332158	3.47866	0.0206653	0.28714	-2.65298
YR	Gapit	Q3+K	Chr7D_609683427	7D	609683427	0.000346735	3.46	0.0302419	0.28714	3.0736
YR	Gapit	Q3+K	Chr7D_609762531	7D	609762531	0.000346735	3.46	0.0302419	0.28714	3.0736
YR	Gapit	Q3+K	Chr7D_609762557	7D	609762557	0.000346735	3.46	0.0302419	0.28714	3.0736
YR	Gapit	Q3+K	Chr7D_611401289	7D	611401289	0.000305885	3.51444	0.0166331	0.28714	-3.60153
YR	Gapit	Q3+K	Chr7D_611401356	7D	611401356	0.000537155	3.2699	0.0173891	0.289366	-3.45639
YR	Gapit	Q3+K	Chr7D_611401359	7D	611401359	0.000537155	3.2699	0.0173891	0.289366	-3.45639
YR	Gapit	Q3+K	Chr7D_611401375	7D	611401375	0.000537155	3.2699	0.0173891	0.289366	-3.45639
YR	Gapit	Q3+K	Chr7D_611401387	7D	611401387	0.000445493	3.35116	0.016129	0.287398	-3.58763
YR	Gapit	Q3+K	Chr7D_611401388	7D	611401388	0.000917172	3.03755	0.015877	0.318115	-3.40418
YR	Gapit	Q3+K	Chr7D_612664397	7D	612664397	0.000571259	3.24317	0.03125	0.289366	2.94929
YR	Gapit	Q3+K	Chr7D_613147912	7D	613147912	0.000782104	3.10674	0.015877	0.295442	3.9858
YR	Gapit	Q3+K	Chr7D_613171556	7D	613171556	0.000635172	3.19711	0.030998	0.289366	2.93829
YR	Gapit	Q3+K	Chr7D_613229627	7D	613229627	0.000127594	3.89417	0.0302419	0.28714	3.29419
YR	Gapit	Q3+K	Chr7D_613438208	7D	613438208	2.7393e-05	4.56236	0.0279738	0.224829	3.76555
YR	Gapit	Q3+K	Chr7D_613559047	7D	613559047	0.000300035	3.52283	0.030746	0.28714	3.13849
YR	Gapit	Q3+K	Chr7D_613686074	7D	613686074	0.000300035	3.52283	0.030746	0.28714	3.13849
YR	Gapit	Q3+K	Chr7D_613686083	7D	613686083	0.000300035	3.52283	0.030746	0.28714	3.13849
YR	Gapit	Q3+K	Chr7D_613688288	7D	613688288	0.000300035	3.52283	0.030746	0.28714	3.13849
YR	Gapit	Q3+K	Chr7D_613689251	7D	613689251	0.000635172	3.19711	0.030998	0.289366	2.93829
YR	Gapit	Q3+K	Chr7D_613713076	7D	613713076	0.000635172	3.19711	0.030998	0.289366	2.93829
YR	Gapit	Q3+K	Chr7D_613713126	7D	613713126	0.000635172	3.19711	0.030998	0.289366	2.93829
YR	Gapit	Q3+K	Chr7D_613713185	7D	613713185	0.000635172	3.19711	0.030998	0.289366	2.93829
YR	FARMCPU	pheno+geno	Chr1A_5244056	1A	5244056	5.22753e-06	5.2817	0.0340222	0.0446721	1.88868
YR	FARMCPU	pheno+geno	Chr1A_17907071	1A	17907071	0.00016313	3.78747	0.0226815	0.501635	2.25794
YR	FARMCPU	pheno+geno	Chr1A_512322009	1A	512322009	5.91237e-07	6.22824	0.226815	0.00986312	-0.895242
YR	FARMCPU	pheno+geno	Chr1A_549675161	1A	549675161	0.000322326	3.4917	0.269657	0.798702	-0.654049
YR	FARMCPU	pheno+geno	Chr1B_3268108	1B	3268108	0.000907409	3.0422	0.0194052	0.998388	-2.05425
YR	FARMCPU	pheno+geno	Chr1B_16382522	1B	16382522	1.74094e-05	4.75922	0.0204133	0.0945024	2.1664
YR	FARMCPU	pheno+geno	Chr1B_420068797	1B	420068797	5.44281e-06	5.26418	0.493952	0.0446721	0.768887
YR	FARMCPU	pheno+geno	Chr1B_608621951	1B	608621951	4.55796e-05	4.34123	0.032006	0.187048	1.63627
YR	FARMCPU	pheno+geno	Chr1B_650009384	1B	650009384	0.000142342	3.84667	0.015877	0.475966	-3.00572
YR	FARMCPU	pheno+geno	Chr1B_697212152	1B	697212152	0.000956094	3.0195	0.0100806	0.998388	-2.53573
YR	FARMCPU	pheno+geno	Chr1D_8677328	1D	8677328	8.33661e-08	7.07901	0.297631	0.00188163	0.926688
YR	FARMCPU	pheno+geno	Chr2A_695038230	2A	695038230	1.06638e-05	4.97209	0.354083	0.0687688	0.729759
YR	FARMCPU	pheno+geno	Chr2A_743485279	2A	743485279	0.000751102	3.1243	0.0146169	0.998388	2.33133
YR	FARMCPU	pheno+geno	Chr2A_779778720	2A	779778720	0.000824472	3.08382	0.144405	0.998388	0.799714
YR	FARMCPU	pheno+geno	Chr2B_27169593	2B	27169593	0.000562944	3.24953	0.376512	0.97739	0.597699
YR	FARMCPU	pheno+geno	Chr2B_102261468	2B	102261468	7.40685e-05	4.13037	0.0347782	0.27863	1.38992
YR	FARMCPU	pheno+geno	Chr2B_173846477	2B	173846477	7.9894e-05	4.09749	0.453881	0.288523	0.595645
YR	FARMCPU	pheno+geno	Chr2B_660133069	2B	660133069	0.000250651	3.60093	0.0216734	0.729985	2.05462
YR	FARMCPU	pheno+geno	Chr2D_54598441	2D	54598441	4.65208e-09	8.33235	0.0211694	0.000210002	-3.2452
YR	FARMCPU	pheno+geno	Chr2D_306671059	2D	306671059	9.09454e-06	5.04122	0.0108367	0.0650738	3.16328
YR	FARMCPU	pheno+geno	Chr3A_7504220	3A	7504220	1.77945e-05	4.74971	0.130292	0.0945024	-1.2811
YR	FARMCPU	pheno+geno	Chr3A_532610343	3A	532610343	0.000338738	3.47014	0.0814012	0.798702	0.866002
YR	FARMCPU	pheno+geno	Chr3A_663107055	3A	663107055	5.30479e-06	5.27533	0.17994	0.0446721	-1.04623
YR	FARMCPU	pheno+geno	Chr3A_745365143	3A	745365143	0.000166688	3.7781	0.106351	0.501635	-0.804972
YR	FARMCPU	pheno+geno	Chr3B_15754217	3B	15754217	0.000607605	3.21638	0.419355	0.998388	0.57026
YR	FARMCPU	pheno+geno	Chr3B_26130376	3B	26130376	0.000336649	3.47282	0.0665323	0.798702	1.15649
YR	FARMCPU	pheno+geno	Chr3B_26130543	3B	26130543	0.000453089	3.34382	0.0667843	0.886626	1.12771
YR	FARMCPU	pheno+geno	Chr3B_26130545	3B	26130545	0.000453089	3.34382	0.0667843	0.886626	1.12771
YR	FARMCPU	pheno+geno	Chr3B_26130562	3B	26130562	0.000410196	3.38701	0.0660282	0.86125	1.14162
YR	FARMCPU	pheno+geno	Chr3B_26130567	3B	26130567	0.000410196	3.38701	0.0660282	0.86125	1.14162
YR	FARMCPU	pheno+geno	Chr3B_764127588	3B	764127588	6.55481e-07	6.18344	0.0249496	0.00986312	-3.01555
YR	FARMCPU	pheno+geno	Chr3B_765267793	3B	765267793	1.61548e-05	4.7917	0.0844254	0.0945024	-1.53637
YR	FARMCPU	pheno+geno	Chr3D_576964403	3D	576964403	0.000310127	3.50846	0.0131048	0.798702	-2.19939
YR	FARMCPU	pheno+geno	Chr4A_110976029	4A	110976029	1.00834e-08	7.99639	0.317288	0.000303453	0.98087
YR	FARMCPU	pheno+geno	Chr4A_593866065	4A	593866065	0.000729375	3.13705	0.444304	0.998388	-0.64489
YR	FARMCPU	pheno+geno	Chr4A_612676019	4A	612676019	0.000552833	3.25741	0.0105847	0.97739	-3.13497
YR	FARMCPU	pheno+geno	Chr4A_613114044	4A	613114044	2.27802e-06	5.64244	0.0128528	0.0257083	-3.77327
YR	FARMCPU	pheno+geno	Chr4A_651282126	4A	651282126	5.08662e-05	4.29357	0.286794	0.199668	-0.650418
YR	FARMCPU	pheno+geno	Chr4B_115985523	4B	115985523	0.000644036	3.19109	0.0128528	0.998388	2.53655
YR	FARMCPU	pheno+geno	Chr4D_481029174	4D	481029174	0.000160708	3.79396	0.0592238	0.501635	-1.33548
YR	FARMCPU	pheno+geno	Chr4D_502911285	4D	502911285	9.37009e-06	5.02826	0.0642641	0.0650738	1.9882
YR	FARMCPU	pheno+geno	Chr5A_297258780	5A	297258780	0.000605631	3.21779	0.014869	0.998388	3.12475
YR	FARMCPU	pheno+geno	Chr5A_297258808	5A	297258808	0.000259839	3.5853	0.015373	0.733095	3.21671
YR	FARMCPU	pheno+geno	Chr5A_297258831	5A	297258831	0.00034952	3.45653	0.015121	0.798702	3.23362
YR	FARMCPU	pheno+geno	Chr5A_297258832	5A	297258832	0.00034952	3.45653	0.015121	0.798702	3.23362
YR	FARMCPU	pheno+geno	Chr5A_458103181	5A	458103181	0.000353866	3.45116	0.221018	0.798702	-0.686899
YR	FARMCPU	pheno+geno	Chr5A_458103206	5A	458103206	0.000555141	3.2556	0.210433	0.97739	-0.675088
YR	FARMCPU	pheno+geno	Chr5B_469983889	5B	469983889	3.82982e-05	4.41682	0.0115927	0.165619	-3.25187
YR	FARMCPU	pheno+geno	Chr6A_533911362	6A	533911362	0.000395194	3.40319	0.43624	0.86125	-0.495033
YR	FARMCPU	pheno+geno	Chr6A_596558668	6A	596558668	3.26861e-05	4.48564	0.015373	0.155316	-2.08606
YR	FARMCPU	pheno+geno	Chr6B_51649618	6B	51649618	0.000968112	3.01407	0.184224	0.998388	0.704844
YR	FARMCPU	pheno+geno	Chr6B_51649666	6B	51649666	0.000968112	3.01407	0.184224	0.998388	0.704844
YR	FARMCPU	pheno+geno	Chr6B_54841657	6B	54841657	0.000757899	3.12039	0.182208	0.998388	0.72333
YR	FARMCPU	pheno+geno	Chr6B_243663920	6B	243663920	5.41163e-16	15.2667	0.0302419	4.88578e-11	-3.73687
YR	FARMCPU	pheno+geno	Chr6D_9184895	6D	9184895	0.000800463	3.09666	0.031754	0.998388	-1.91897
YR	FARMCPU	pheno+geno	Chr6D_33049623	6D	33049623	1.03231e-06	5.98619	0.0113407	0.0133144	-4.37829
YR	FARMCPU	pheno+geno	Chr7A_11383674	7A	11383674	0.000481205	3.31767	0.105343	0.886626	0.914007
YR	FARMCPU	pheno+geno	Chr7A_11389558	7A	11389558	0.000465362	3.33221	0.100806	0.886626	0.93095
YR	FARMCPU	pheno+geno	Chr7A_11389562	7A	11389562	0.000311404	3.50668	0.101815	0.798702	0.954835
YR	FARMCPU	pheno+geno	Chr7A_43872863	7A	43872863	0.000645751	3.18993	0.0985383	0.998388	0.999213
YR	FARMCPU	pheno+geno	Chr7A_113791471	7A	113791471	0.000444664	3.35197	0.0378024	0.886626	1.56813
YR	FARMCPU	pheno+geno	Chr7B_909070	7B	909070	3.85233e-05	4.41428	0.0239415	0.165619	-2.60259
YR	FARMCPU	pheno+geno	Chr7B_12645319	7B	12645319	0.000111067	3.95441	0.146169	0.385672	-0.778684
YR	FARMCPU	pheno+geno	Chr7B_76976297	7B	76976297	0.000476629	3.32182	0.0118448	0.886626	-2.56509
YR	FARMCPU	pheno+geno	Chr7B_87157653	7B	87157653	3.13635e-05	4.50358	0.210433	0.155316	-0.752201
YR	Tassel	Q3+K	Chr1A_25894181	1A	25894181	0.00066409	3.17777				0.00741
YR	Tassel	Q3+K	Chr1A_25894195	1A	25894195	0.00092229	3.03513				0.00708
YR	Tassel	Q3+K	Chr1A_25894215	1A	25894215	0.00066409	3.17777				0.00741
YR	Tassel	Q3+K	Chr1A_25894254	1A	25894254	0.00062232	3.20599				0.00748
YR	Tassel	Q3+K	Chr1A_397969487	1A	397969487	0.00091627	3.03798				0.00708
YR	Tassel	Q3+K	Chr1A_509378698	1A	509378698	0.00072952	3.13696				0.00731
YR	Tassel	Q3+K	Chr1A_509378703	1A	509378703	0.00058307	3.23428				0.00754
YR	Tassel	Q3+K	Chr1A_520671952	1A	520671952	0.00013493	3.86989				0.00903
YR	Tassel	Q3+K	Chr1B_19499089	1B	19499089	0.0003905	3.40838				0.00795
YR	Tassel	Q3+K	Chr1B_41805883	1B	41805883	9.4714e-05	4.02359				0.00939
YR	Tassel	Q3+K	Chr1B_41989816	1B	41989816	0.00028017	3.55258				0.00829
YR	Tassel	Q3+K	Chr1B_42967272	1B	42967272	0.0005341	3.27238				0.00763
YR	Tassel	Q3+K	Chr1B_68962568	1B	68962568	0.00066631	3.17632				0.00741
YR	Tassel	Q3+K	Chr1B_348842078	1B	348842078	5.1135e-05	4.29128				0.01002
YR	Tassel	Q3+K	Chr1B_493798052	1B	493798052	0.00033242	3.47831				0.00811
YR	Tassel	Q3+K	Chr1D_6979967	1D	6979967	0.00049165	3.30834				0.00771
YR	Tassel	Q3+K	Chr1D_8677328	1D	8677328	0.00043956	3.35698				0.00783
YR	Tassel	Q3+K	Chr1D_8802655	1D	8802655	0.00022556	3.64674				0.00851
YR	Tassel	Q3+K	Chr1D_8802671	1D	8802671	0.00022556	3.64674				0.00851
YR	Tassel	Q3+K	Chr1D_8802672	1D	8802672	0.00022556	3.64674				0.00851
YR	Tassel	Q3+K	Chr1D_8802726	1D	8802726	0.00022556	3.64674				0.00851
YR	Tassel	Q3+K	Chr1D_8874957	1D	8874957	0.00026772	3.57232				0.00833
YR	Tassel	Q3+K	Chr1D_8874972	1D	8874972	0.00026772	3.57232				0.00833
YR	Tassel	Q3+K	Chr1D_8874976	1D	8874976	0.00025381	3.59549				0.00839
YR	Tassel	Q3+K	Chr1D_8875018	1D	8875018	0.00026772	3.57232				0.00833
YR	Tassel	Q3+K	Chr1D_8875030	1D	8875030	0.00026772	3.57232				0.00833
YR	Tassel	Q3+K	Chr1D_17092465	1D	17092465	0.00065891	3.18117				0.00742
YR	Tassel	Q3+K	Chr1D_17092468	1D	17092468	0.00065891	3.18117				0.00742
YR	Tassel	Q3+K	Chr1D_17092475	1D	17092475	0.00065891	3.18117				0.00742
YR	Tassel	Q3+K	Chr1D_17092526	1D	17092526	0.00065891	3.18117				0.00742
YR	Tassel	Q3+K	Chr2A_5083239	2A	5083239	0.00034149	3.46662				0.00809
YR	Tassel	Q3+K	Chr2A_67030126	2A	67030126	0.00059557	3.22507				0.00752
YR	Tassel	Q3+K	Chr2A_160193315	2A	160193315	0.00077138	3.11273				0.00726
YR	Tassel	Q3+K	Chr2A_207786406	2A	207786406	0.00032691	3.48557				0.00653
YR	Tassel	Q3+K	Chr2A_207846155	2A	207846155	0.00049458	3.30576				0.00614
YR	Tassel	Q3+K	Chr2A_619131626	2A	619131626	0.00076308	3.11743				0.00727
YR	Tassel	Q3+K	Chr2A_773783618	2A	773783618	0.00072836	3.13765				0.00732
YR	Tassel	Q3+K	Chr2A_773783628	2A	773783628	0.00062992	3.20071				0.00746
YR	Tassel	Q3+K	Chr2A_773783630	2A	773783630	0.00072836	3.13765				0.00732
YR	Tassel	Q3+K	Chr2B_8071137	2B	8071137	0.0004036	3.39405				0.00633
YR	Tassel	Q3+K	Chr2B_8093673	2B	8093673	0.0004036	3.39405				0.00633
YR	Tassel	Q3+K	Chr2B_85310692	2B	85310692	8.6999e-05	4.06049				0.0078
YR	Tassel	Q3+K	Chr2B_660133069	2B	660133069	0.00087759	3.05671				0.00713
YR	Tassel	Q3+K	Chr2B_686689506	2B	686689506	0.0005817	3.2353				0.00599
YR	Tassel	Q3+K	Chr2B_686689507	2B	686689507	0.0005817	3.2353				0.00599
YR	Tassel	Q3+K	Chr2B_686689536	2B	686689536	0.0005817	3.2353				0.00599
YR	Tassel	Q3+K	Chr2B_686689602	2B	686689602	0.0005817	3.2353				0.00599
YR	Tassel	Q3+K	Chr2B_686689621	2B	686689621	0.0004091	3.38817				0.0079
YR	Tassel	Q3+K	Chr2B_686689639	2B	686689639	0.0004091	3.38817				0.0079
YR	Tassel	Q3+K	Chr2B_686689678	2B	686689678	0.0004091	3.38817				0.0079
YR	Tassel	Q3+K	Chr2B_686689922	2B	686689922	0.0005817	3.2353				0.00599
YR	Tassel	Q3+K	Chr2B_784670487	2B	784670487	0.00087574	3.05762				0.00713
YR	Tassel	Q3+K	Chr2B_784701561	2B	784701561	0.00095769	3.01878				0.00552
YR	Tassel	Q3+K	Chr2B_784701567	2B	784701567	0.00095769	3.01878				0.00552
YR	Tassel	Q3+K	Chr2B_784701583	2B	784701583	0.00095769	3.01878				0.00552
YR	Tassel	Q3+K	Chr2B_785807441	2B	785807441	0.00026019	3.58471				0.00836
YR	Tassel	Q3+K	Chr2D_54598441	2D	54598441	0.00072034	3.14246				0.00733
YR	Tassel	Q3+K	Chr2D_105395604	2D	105395604	8.8995e-05	4.05063				0.00945
YR	Tassel	Q3+K	Chr2D_105402320	2D	105402320	3.3159e-05	4.4794				0.01046
YR	Tassel	Q3+K	Chr2D_105402478	2D	105402478	1.213e-05	4.91614				0.01149
YR	Tassel	Q3+K	Chr2D_105495462	2D	105495462	0.0001037	3.98422				0.0093
YR	Tassel	Q3+K	Chr2D_107244031	2D	107244031	0.00026986	3.56886				0.00832
YR	Tassel	Q3+K	Chr2D_109021782	2D	109021782	0.00025418	3.59486				0.00839
YR	Tassel	Q3+K	Chr2D_109305872	2D	109305872	0.00017075	3.76764				0.00879
YR	Tassel	Q3+K	Chr2D_306671059	2D	306671059	0.00029072	3.53653				0.00825
YR	Tassel	Q3+K	Chr2D_566342964	2D	566342964	9.7086e-05	4.01284				0.00937
YR	Tassel	Q3+K	Chr2D_567416795	2D	567416795	0.00012651	3.89788				0.0091
YR	Tassel	Q3+K	Chr2D_622994247	2D	622994247	0.00033344	3.47698				0.00811
YR	Tassel	Q3+K	Chr2D_622994276	2D	622994276	0.00033344	3.47698				0.00811
YR	Tassel	Q3+K	Chr2D_634519367	2D	634519367	4.0387e-06	5.39376				0.01261
YR	Tassel	Q3+K	Chr2D_634519379	2D	634519379	4.0387e-06	5.39376				0.01261
YR	Tassel	Q3+K	Chr2D_648708411	2D	648708411	0.00041839	3.37842				0.00788
YR	Tassel	Q3+K	Chr3A_702094980	3A	702094980	0.00069864	3.15575				0.00582
YR	Tassel	Q3+K	Chr3A_702675483	3A	702675483	0.00090607	3.04284				0.00709
YR	Tassel	Q3+K	Chr3A_702690366	3A	702690366	0.0001478	3.83033				0.00729
YR	Tassel	Q3+K	Chr3A_702690429	3A	702690429	0.0001478	3.83033				0.00729
YR	Tassel	Q3+K	Chr3A_702725415	3A	702725415	0.00061358	3.21213				0.00749
YR	Tassel	Q3+K	Chr3A_703038591	3A	703038591	0.00082925	3.08131				0.00718
YR	Tassel	Q3+K	Chr3A_703039504	3A	703039504	0.00055489	3.25579				0.00759
YR	Tassel	Q3+K	Chr3A_703052855	3A	703052855	0.00049245	3.30764				0.00771
YR	Tassel	Q3+K	Chr3A_703052877	3A	703052877	0.00055706	3.2541				0.00759
YR	Tassel	Q3+K	Chr3A_703052898	3A	703052898	0.00049245	3.30764				0.00771
YR	Tassel	Q3+K	Chr3A_703052919	3A	703052919	0.00049245	3.30764				0.00771
YR	Tassel	Q3+K	Chr3A_703052932	3A	703052932	0.00049245	3.30764				0.00771
YR	Tassel	Q3+K	Chr3A_703052933	3A	703052933	0.00049245	3.30764				0.00771
YR	Tassel	Q3+K	Chr3A_703052978	3A	703052978	0.00080193	3.09586				0.00722
YR	Tassel	Q3+K	Chr3A_703095252	3A	703095252	0.00063157	3.19958				0.00746
YR	Tassel	Q3+K	Chr3A_703095421	3A	703095421	0.00049935	3.30159				0.0077
YR	Tassel	Q3+K	Chr3A_703097174	3A	703097174	0.00073706	3.1325				0.0073
YR	Tassel	Q3+K	Chr3A_703097505	3A	703097505	0.00077118	3.11284				0.00726
YR	Tassel	Q3+K	Chr3A_714036087	3A	714036087	0.00060021	3.2217				0.00751
YR	Tassel	Q3+K	Chr3B_17069609	3B	17069609	0.00039277	3.40586				0.00794
YR	Tassel	Q3+K	Chr3B_19006347	3B	19006347	0.00052418	3.28052				0.00765
YR	Tassel	Q3+K	Chr3B_138135975	3B	138135975	0.00066671	3.17606				0.0074
YR	Tassel	Q3+K	Chr3B_764127588	3B	764127588	0.00091596	3.03812				0.00708
YR	Tassel	Q3+K	Chr3B_765267793	3B	765267793	3.6303e-05	4.44006				0.01037
YR	Tassel	Q3+K	Chr3B_765485512	3B	765485512	0.00067258	3.17226				0.0074
YR	Tassel	Q3+K	Chr3B_765692190	3B	765692190	0.00063106	3.19993				0.00746
YR	Tassel	Q3+K	Chr3B_765692191	3B	765692191	0.00070027	3.15473				0.00736
YR	Tassel	Q3+K	Chr3B_775096447	3B	775096447	0.00051667	3.28679				0.00766
YR	Tassel	Q3+K	Chr3B_776806568	3B	776806568	0.00054935	3.26015				0.0076
YR	Tassel	Q3+K	Chr3B_847804475	3B	847804475	0.00064009	3.19376				0.00745
YR	Tassel	Q3+K	Chr3D_68538271	3D	68538271	0.00092299	3.0348				0.00555
YR	Tassel	Q3+K	Chr3D_68538277	3D	68538277	0.00037079	3.43087				0.00641
YR	Tassel	Q3+K	Chr3D_68538288	3D	68538288	0.00092299	3.0348				0.00555
YR	Tassel	Q3+K	Chr3D_68538310	3D	68538310	0.00037079	3.43087				0.00641
YR	Tassel	Q3+K	Chr3D_334057584	3D	334057584	0.00069368	3.15884				0.00582
YR	Tassel	Q3+K	Chr3D_483498909	3D	483498909	0.00090522	3.04325				0.00557
YR	Tassel	Q3+K	Chr3D_531010129	3D	531010129	0.00089395	3.04869				0.00558
YR	Tassel	Q3+K	Chr3D_532779488	3D	532779488	0.00065134	3.18619				0.00743
YR	Tassel	Q3+K	Chr3D_577862715	3D	577862715	0.00070434	3.15222				0.00581
YR	Tassel	Q3+K	Chr4A_13666506	4A	13666506	0.00031166	3.50632				0.00818
YR	Tassel	Q3+K	Chr4A_105731131	4A	105731131	0.00060038	3.22157				0.00751
YR	Tassel	Q3+K	Chr4A_106283145	4A	106283145	0.00043101	3.36551				0.00785
YR	Tassel	Q3+K	Chr4A_106876726	4A	106876726	0.00022808	3.64191				0.0085
YR	Tassel	Q3+K	Chr4A_107917148	4A	107917148	0.00051671	3.28675				0.00766
YR	Tassel	Q3+K	Chr4A_107917166	4A	107917166	0.00051671	3.28675				0.00766
YR	Tassel	Q3+K	Chr4A_109152133	4A	109152133	0.00063377	3.19807				0.00746
YR	Tassel	Q3+K	Chr4A_110799250	4A	110799250	0.00056486	3.24806				0.00757
YR	Tassel	Q3+K	Chr4A_110976029	4A	110976029	0.00016534	3.78162				0.00882
YR	Tassel	Q3+K	Chr4A_113486925	4A	113486925	0.00088119	3.05493				0.00712
YR	Tassel	Q3+K	Chr4A_113486926	4A	113486926	0.00088119	3.05493				0.00712
YR	Tassel	Q3+K	Chr4A_113514741	4A	113514741	0.00085222	3.06945				0.00716
YR	Tassel	Q3+K	Chr4A_612892487	4A	612892487	0.00043367	3.36284				0.00784
YR	Tassel	Q3+K	Chr4A_613114008	4A	613114008	0.00072863	3.13749				0.00731
YR	Tassel	Q3+K	Chr4A_613114044	4A	613114044	0.00018938	3.72267				0.00868
YR	Tassel	Q3+K	Chr4A_613114089	4A	613114089	0.00044905	3.34771				0.00781
YR	Tassel	Q3+K	Chr4A_619447808	4A	619447808	0.00049653	3.30405				0.00614
YR	Tassel	Q3+K	Chr4A_694082339	4A	694082339	0.00063632	3.19632				0.0059
YR	Tassel	Q3+K	Chr4A_694082341	4A	694082341	0.00063632	3.19632				0.0059
YR	Tassel	Q3+K	Chr4B_14829745	4B	14829745	0.0007632	3.11736				0.00727
YR	Tassel	Q3+K	Chr4B_668748160	4B	668748160	2.7895e-05	4.55447				0.01064
YR	Tassel	Q3+K	Chr4D_423293275	4D	423293275	0.00093478	3.02929				0.00706
YR	Tassel	Q3+K	Chr4D_423293279	4D	423293279	0.00093478	3.02929				0.00706
YR	Tassel	Q3+K	Chr4D_423293290	4D	423293290	0.00093478	3.02929				0.00706
YR	Tassel	Q3+K	Chr4D_423293295	4D	423293295	0.00093478	3.02929				0.00706
YR	Tassel	Q3+K	Chr4D_423293296	4D	423293296	0.00094578	3.02421				0.00705
YR	Tassel	Q3+K	Chr4D_423293301	4D	423293301	0.00093478	3.02929				0.00706
YR	Tassel	Q3+K	Chr4D_509604941	4D	509604941	0.00029441	3.53105				0.00824
YR	Tassel	Q3+K	Chr4D_511655108	4D	511655108	0.00061786	3.20911				0.00748
YR	Tassel	Q3+K	Chr4D_512088250	4D	512088250	0.00068872	3.16196				0.00737
YR	Tassel	Q3+K	Chr5A_32753621	5A	32753621	0.00033297	3.47759				0.00811
YR	Tassel	Q3+K	Chr5B_107135324	5B	107135324	0.00026732	3.57297				0.00833
YR	Tassel	Q3+K	Chr5B_467171844	5B	467171844	0.00056963	3.24441				0.00756
YR	Tassel	Q3+K	Chr5B_469983889	5B	469983889	0.00056218	3.25012				0.00602
YR	Tassel	Q3+K	Chr5B_480869458	5B	480869458	0.00079542	3.0994				0.00569
YR	Tassel	Q3+K	Chr5B_494031044	5B	494031044	7.6588e-06	5.11584				0.01015
YR	Tassel	Q3+K	Chr5B_700296049	5B	700296049	0.00091735	3.03746				0.00708
YR	Tassel	Q3+K	Chr5B_700468134	5B	700468134	0.00091735	3.03746				0.00708
YR	Tassel	Q3+K	Chr5B_700685245	5B	700685245	0.00079354	3.10043				0.00723
YR	Tassel	Q3+K	Chr5B_700686116	5B	700686116	0.00053468	3.27191				0.00763
YR	Tassel	Q3+K	Chr5B_700686132	5B	700686132	0.00064669	3.1893				0.00744
YR	Tassel	Q3+K	Chr5D_342090866	5D	342090866	1.5359e-06	5.81364				0.01172
YR	Tassel	Q3+K	Chr6A_181013348	6A	181013348	0.00098547	3.00636				0.00701
YR	Tassel	Q3+K	Chr6A_595548863	6A	595548863	0.00032403	3.48941				0.00814
YR	Tassel	Q3+K	Chr6B_4438407	6B	4438407	9.5663e-05	4.01926				0.00938
YR	Tassel	Q3+K	Chr6B_18814806	6B	18814806	0.00015401	3.81245				0.0089
YR	Tassel	Q3+K	Chr6B_21178697	6B	21178697	3.3532e-05	4.47454				0.01045
YR	Tassel	Q3+K	Chr6B_44417754	6B	44417754	0.0008935	3.04891				0.00711
YR	Tassel	Q3+K	Chr6B_51649618	6B	51649618	0.00072487	3.13974				0.00732
YR	Tassel	Q3+K	Chr6B_51649666	6B	51649666	0.00072487	3.13974				0.00732
YR	Tassel	Q3+K	Chr6B_51650180	6B	51650180	0.00065739	3.18218				0.00742
YR	Tassel	Q3+K	Chr6B_51650219	6B	51650219	0.00065739	3.18218				0.00742
YR	Tassel	Q3+K	Chr6B_51650260	6B	51650260	0.00065739	3.18218				0.00742
YR	Tassel	Q3+K	Chr6B_51650326	6B	51650326	0.00065897	3.18113				0.00742
YR	Tassel	Q3+K	Chr6B_52150008	6B	52150008	0.00098915	3.00474				0.007
YR	Tassel	Q3+K	Chr6B_52283399	6B	52283399	0.00081936	3.08653				0.0072
YR	Tassel	Q3+K	Chr6B_54841657	6B	54841657	0.00074737	3.12646				0.00729
YR	Tassel	Q3+K	Chr6B_221764439	6B	221764439	6.1276e-05	4.21271				0.00983
YR	Tassel	Q3+K	Chr6B_243663920	6B	243663920	6.2626e-05	4.20325				0.00812
YR	Tassel	Q3+K	Chr6B_452580801	6B	452580801	0.00038049	3.41966				0.00639
YR	Tassel	Q3+K	Chr6B_507187987	6B	507187987	0.0004692	3.32864				0.00776
YR	Tassel	Q3+K	Chr6B_569110212	6B	569110212	0.00022794	3.64218				0.0085
YR	Tassel	Q3+K	Chr6B_650930627	6B	650930627	3.1373e-05	4.50344				0.01052
YR	Tassel	Q3+K	Chr6B_687793127	6B	687793127	0.00025019	3.60173				0.0084
YR	Tassel	Q3+K	Chr6B_724177029	6B	724177029	0.00056071	3.25126				0.00758
YR	Tassel	Q3+K	Chr6B_724177073	6B	724177073	0.00056071	3.25126				0.00758
YR	Tassel	Q3+K	Chr6D_2919493	6D	2919493	0.0004643	3.3332				0.00777
YR	Tassel	Q3+K	Chr6D_2919498	6D	2919498	0.0004643	3.3332				0.00777
YR	Tassel	Q3+K	Chr6D_2919509	6D	2919509	0.0004643	3.3332				0.00777
YR	Tassel	Q3+K	Chr6D_2919517	6D	2919517	0.0004643	3.3332				0.00777
YR	Tassel	Q3+K	Chr6D_4486122	6D	4486122	4.7975e-05	4.31899				0.01008
YR	Tassel	Q3+K	Chr6D_10518191	6D	10518191	0.00041664	3.38024				0.00788
YR	Tassel	Q3+K	Chr6D_33049623	6D	33049623	3.6697e-06	5.43537				0.01271
YR	Tassel	Q3+K	Chr6D_33049631	6D	33049631	3.6697e-06	5.43537				0.01271
YR	Tassel	Q3+K	Chr6D_34437403	6D	34437403	0.00014756	3.83103				0.00894
YR	Tassel	Q3+K	Chr6D_34437404	6D	34437404	0.00062732	3.20251				0.00747
YR	Tassel	Q3+K	Chr6D_34437427	6D	34437427	0.00088151	3.05477				0.00712
YR	Tassel	Q3+K	Chr6D_34437437	6D	34437437	0.00080812	3.09252				0.00721
YR	Tassel	Q3+K	Chr6D_156170678	6D	156170678	7.7354e-05	4.11152				0.0096
YR	Tassel	Q3+K	Chr6D_156170695	6D	156170695	7.7354e-05	4.11152				0.0096
YR	Tassel	Q3+K	Chr6D_156170696	6D	156170696	8.0783e-05	4.09268				0.00955
YR	Tassel	Q3+K	Chr6D_156170697	6D	156170697	8.0783e-05	4.09268				0.00955
YR	Tassel	Q3+K	Chr6D_156170698	6D	156170698	8.0783e-05	4.09268				0.00955
YR	Tassel	Q3+K	Chr6D_156170708	6D	156170708	7.7354e-05	4.11152				0.0096
YR	Tassel	Q3+K	Chr6D_156170726	6D	156170726	7.7354e-05	4.11152				0.0096
YR	Tassel	Q3+K	Chr6D_156170749	6D	156170749	7.7354e-05	4.11152				0.0096
YR	Tassel	Q3+K	Chr6D_442237986	6D	442237986	0.000346	3.46092				0.00807
YR	Tassel	Q3+K	Chr6D_449315804	6D	449315804	0.0009685	3.0139				0.00703
YR	Tassel	Q3+K	Chr6D_492089208	6D	492089208	0.00096849	3.0139				0.00703
YR	Tassel	Q3+K	Chr6D_492412583	6D	492412583	1.833e-05	4.73684				0.01106
YR	Tassel	Q3+K	Chr6D_492674412	6D	492674412	0.00079892	3.0975				0.00722
YR	Tassel	Q3+K	Chr7A_34099771	7A	34099771	0.00093422	3.02955				0.00706
YR	Tassel	Q3+K	Chr7A_34980405	7A	34980405	0.00056574	3.24738				0.00757
YR	Tassel	Q3+K	Chr7A_66609053	7A	66609053	0.0002386	3.62233				0.00845
YR	Tassel	Q3+K	Chr7A_499728764	7A	499728764	8.7644e-05	4.05728				0.00947
YR	Tassel	Q3+K	Chr7A_530893173	7A	530893173	0.00022429	3.64919				0.00851
YR	Tassel	Q3+K	Chr7A_531557707	7A	531557707	0.00047548	3.32287				0.00775
YR	Tassel	Q3+K	Chr7A_534510620	7A	534510620	0.00062116	3.2068				0.00748
YR	Tassel	Q3+K	Chr7A_540732585	7A	540732585	0.00098352	3.00722				0.00701
YR	Tassel	Q3+K	Chr7A_641051755	7A	641051755	0.00037237	3.42903				0.008
YR	Tassel	Q3+K	Chr7A_684564991	7A	684564991	9.593e-05	4.01805				0.00938
YR	Tassel	Q3+K	Chr7A_684601429	7A	684601429	8.2711e-05	4.08244				0.00953
YR	Tassel	Q3+K	Chr7A_684601466	7A	684601466	8.42e-05	4.07469				0.00951
YR	Tassel	Q3+K	Chr7A_686598866	7A	686598866	7.7069e-05	4.11312				0.0096
YR	Tassel	Q3+K	Chr7A_686808245	7A	686808245	1.8215e-05	4.73957				0.01107
YR	Tassel	Q3+K	Chr7A_711520892	7A	711520892	0.0003338	3.47651				0.00811
YR	Tassel	Q3+K	Chr7B_29648389	7B	29648389	4.8383e-05	4.31531				0.01007
YR	Tassel	Q3+K	Chr7B_29782994	7B	29782994	0.0007871	3.10397				0.00724
YR	Tassel	Q3+K	Chr7B_114063977	7B	114063977	0.0009344	3.02947				0.00706
YR	Tassel	Q3+K	Chr7B_731136313	7B	731136313	0.00036591	3.43663				0.00801
YR	Tassel	Q3+K	Chr7D_107316169	7D	107316169	0.00042792	3.36864				0.00786
YR	Tassel	Q3+K	Chr7D_468027804	7D	468027804	0.00036104	3.44244				0.00644
YR	Tassel	Q3+K	Chr7D_608499789	7D	608499789	8.6299e-06	5.06399				0.01183
YR	Tassel	Q3+K	Chr7D_609683427	7D	609683427	0.00038101	3.41906				0.00639
YR	Tassel	Q3+K	Chr7D_609762531	7D	609762531	0.00038101	3.41906				0.00639
YR	Tassel	Q3+K	Chr7D_609762557	7D	609762557	0.00038101	3.41906				0.00639
YR	Tassel	Q3+K	Chr7D_611401356	7D	611401356	0.000189	3.72354				0.00869
YR	Tassel	Q3+K	Chr7D_611401359	7D	611401359	0.000189	3.72354				0.00869
YR	Tassel	Q3+K	Chr7D_611401375	7D	611401375	0.000189	3.72354				0.00869
YR	Tassel	Q3+K	Chr7D_611401387	7D	611401387	9.1027e-05	4.04083				0.00943
YR	Tassel	Q3+K	Chr7D_611401388	7D	611401388	0.0003463	3.46055				0.00807
YR	Tassel	Q3+K	Chr7D_611401394	7D	611401394	0.00042053	3.3762				0.00787
YR	Tassel	Q3+K	Chr7D_613229627	7D	613229627	0.00050322	3.29824				0.00769
YR	Tassel	Q3+K	Chr7D_613438208	7D	613438208	0.00014453	3.84004				0.00896
YR	Genable		CHR6B_243663920	6B	243663920	3.15696e-05	4.50073	0.0302419		3.77368	0.0128854	1.28854
YR	Genable		CHR4D_502911285	4D	502911285	0.00028011	3.55267	0.0642641		-2.55367	0.0120988	1.20988
YR	Genable		CHR4D_502911290	4D	502911290	0.00028011	3.55267	0.0642641		-2.55367	0.0120988	1.20988
YR	Genable		CHR4D_502911302	4D	502911302	0.00028011	3.55267	0.0642641		-2.55367	0.0120988	1.20988
YR	Genable		CHR4D_502911314	4D	502911314	0.00028011	3.55267	0.0642641		-2.55367	0.0120988	1.20988
YR	Genable		CHR7D_613438208	7D	613438208	2.67621e-05	4.57248	0.0279738		-3.76179	0.0118717	1.18717
YR	Genable		CHR4D_503102006	4D	503102006	0.000352361	3.45301	0.0645161		-2.50903	0.0117222	1.17222
YR	Genable		CHR4D_502885273	4D	502885273	0.000417972	3.37885	0.0650202		-2.48669	0.0115981	1.15981
YR	Genable		CHR4D_503101966	4D	503101966	0.000417972	3.37885	0.0650202		-2.48669	0.0115981	1.15981
YR	Genable		CHR4D_503293723	4D	503293723	0.000448372	3.34836	0.0650202		-2.47524	0.0114916	1.14916
YR	Genable		CHR4D_503293724	4D	503293724	0.000448372	3.34836	0.0650202		-2.47524	0.0114916	1.14916
YR	Genable		CHR4D_503102037	4D	503102037	0.000500534	3.30057	0.0647681		-2.45094	0.0112264	1.12264
YR	Genable		CHR4D_503201435	4D	503201435	0.000536772	3.27021	0.0647681		-2.43929	0.0111199	1.11199
YR	Genable		CHR4D_503201470	4D	503201470	0.000536772	3.27021	0.0647681		-2.43929	0.0111199	1.11199
YR	Genable		CHR4D_503272494	4D	503272494	0.000536772	3.27021	0.0647681		-2.43929	0.0111199	1.11199
YR	Genable		CHR4D_503272498	4D	503272498	0.000536772	3.27021	0.0647681		-2.43929	0.0111199	1.11199
YR	Genable		CHR4D_503272510	4D	503272510	0.000536772	3.27021	0.0647681		-2.43929	0.0111199	1.11199
YR	Genable		CHR4D_503272512	4D	503272512	0.000536772	3.27021	0.0647681		-2.43929	0.0111199	1.11199
YR	Genable		CHR4D_503272519	4D	503272519	0.000536772	3.27021	0.0647681		-2.43929	0.0111199	1.11199
YR	Genable		CHR4D_503272543	4D	503272543	0.000536772	3.27021	0.0647681		-2.43929	0.0111199	1.11199
YR	Genable		CHR4D_503272548	4D	503272548	0.000536772	3.27021	0.0647681		-2.43929	0.0111199	1.11199
YR	Genable		CHR4D_503201419	4D	503201419	0.000616257	3.21024	0.0677923		-2.36307	0.0108878	1.08878
YR	Genable		CHR4D_503201433	4D	503201433	0.000756317	3.1213	0.0650202		-2.38065	0.01063	1.063
YR	Genable		CHR4D_503201461	4D	503201461	0.000756317	3.1213	0.0650202		-2.38065	0.01063	1.063
YR	Genable		CHR4D_503201467	4D	503201467	0.000756317	3.1213	0.0650202		-2.38065	0.01063	1.063
YR	Genable		CHR4D_503201501	4D	503201501	0.000756317	3.1213	0.0650202		-2.38065	0.01063	1.063
YR	Genable		CHR4D_501311056	4D	501311056	0.000832991	3.07936	0.0637601		-2.3466	0.0101416	1.01416
YR	Genable		CHR4D_503293465	4D	503293465	0.000886413	3.05236	0.0652722		-2.32093	0.0101399	1.01399
YR	Genable		CHR4D_503293514	4D	503293514	0.000886413	3.05236	0.0652722		-2.32093	0.0101399	1.01399
YR	Genable		CHR2B_622947360	2B	622947360	0.000525112	3.27975	0.242188		1.3315	0.0100389	1.00389
YR	Genable		CHR2D_566342964	2D	566342964	8.01799e-06	5.09593	0.0244456		-3.64786	0.00979087	0.979087
YR	Genable		CHR4A_110976029	4A	110976029	0.000338821	3.47003	0.317288		-1.20419	0.00969108	0.969108
YR	Genable		CHR7D_613229627	7D	613229627	0.000149869	3.82429	0.0302419		-3.26057	0.00961954	0.961954
YR	Genable		CHR4A_106876726	4A	106876726	0.00036586	3.43669	0.316784		-1.19492	0.00953434	0.953434
YR	Genable		CHR2D_105402478	2D	105402478	8.48374e-06	5.07141	0.0559476		-2.38898	0.00930026	0.930026
YR	Genable		CHR4D_509604941	4D	509604941	5.99567e-06	5.22216	0.047631		2.55545	0.00913953	0.913953
YR	Genable		CHR7D_613559047	7D	613559047	0.000356868	3.44749	0.030746		-3.10145	0.00884403	0.884403
YR	Genable		CHR7D_613686074	7D	613686074	0.000356868	3.44749	0.030746		-3.10145	0.00884403	0.884403
YR	Genable		CHR7D_613686083	7D	613686083	0.000356868	3.44749	0.030746		-3.10145	0.00884403	0.884403
YR	Genable		CHR7D_613688288	7D	613688288	0.000356868	3.44749	0.030746		-3.10145	0.00884403	0.884403
YR	Genable		CHR6B_650930627	6B	650930627	1.50042e-05	4.82379	0.0126008		4.7894	0.00880536	0.880536
YR	Genable		CHR4A_107917148	4A	107917148	0.000599669	3.22209	0.315524		-1.14952	0.00880471	0.880471
YR	Genable		CHR4A_107917166	4A	107917166	0.000599669	3.22209	0.315524		-1.14952	0.00880471	0.880471
YR	Genable		CHR2B_618602064	2B	618602064	0.000626674	3.20296	0.309728		1.1512	0.00874165	0.874165
YR	Genable		CHR4A_110799250	4A	110799250	0.000646369	3.18952	0.318044		-1.14244	0.00873376	0.873376
YR	Genable		CHR5B_494031044	5B	494031044	1.37438e-05	4.86189	0.0186492		-3.92348	0.00869203	0.869203
YR	Genable		CHR4A_105731131	4A	105731131	0.000732975	3.13491	0.316532		-1.13454	0.00859148	0.859148
YR	Genable		CHR4A_109152133	4A	109152133	0.000757256	3.12076	0.318044		-1.13229	0.00857929	0.857929
YR	Genable		CHR3D_334057584	3D	334057584	0.000201722	3.69525	0.0110887		-5.00001	0.0084581	0.84581
YR	Genable		CHR5D_342090866	5D	342090866	3.92777e-06	5.40585	0.0100806		5.23985	0.00845316	0.845316
YR	Genable		CHR7D_609683427	7D	609683427	0.000415167	3.38178	0.0302419		-3.03389	0.0083285	0.83285
YR	Genable		CHR7D_609762531	7D	609762531	0.000415167	3.38178	0.0302419		-3.03389	0.0083285	0.83285
YR	Genable		CHR7D_609762557	7D	609762557	0.000415167	3.38178	0.0302419		-3.03389	0.0083285	0.83285
YR	Genable		CHR2B_621927514	2B	621927514	0.000734631	3.13393	0.297883		1.13348	0.00829044	0.829044
YR	Genable		CHR2B_621920182	2B	621920182	0.000769328	3.11389	0.293599		1.13681	0.00826941	0.826941
YR	Genable		CHR4A_113514741	4A	113514741	0.000960937	3.01731	0.330645		-1.10017	0.00826474	0.826474
YR	Genable		CHR2D_105402320	2D	105402320	2.55656e-05	4.59234	0.0554435		-2.25916	0.00824646	0.824646
YR	Genable		CHR2A_510880388	2A	510880388	0.000313731	3.50344	0.452369		-1.03857	0.00824418	0.824418
YR	Genable		CHR3A_612292702	3A	612292702	0.000502248	3.29908	0.0259577		3.24796	0.00822921	0.822921
YR	Genable		CHR2A_510841913	2A	510841913	0.000405783	3.39171	0.451865		-1.02581	0.00804129	0.804129
YR	Genable		CHR6B_51649618	6B	51649618	0.000166696	3.77808	0.184224		-1.30892	0.00794391	0.794391
YR	Genable		CHR6B_51649666	6B	51649666	0.000166696	3.77808	0.184224		-1.30892	0.00794391	0.794391
YR	Genable		CHR6B_51650326	6B	51650326	0.000179151	3.74678	0.18498		-1.30074	0.00786991	0.786991
YR	Genable		CHR7D_612664397	7D	612664397	0.000713044	3.14688	0.03125		-2.90095	0.00786024	0.786024
YR	Genable		CHR6B_54841657	6B	54841657	0.00015918	3.79811	0.182208		-1.30487	0.00782773	0.782773
YR	Genable		CHR2D_105495462	2D	105495462	4.15979e-05	4.38093	0.0556956		-2.19604	0.00782537	0.782537
YR	Genable		CHR2A_41309534	2A	41309534	7.83641e-05	4.10588	0.0194052		-3.64195	0.00778702	0.778702
YR	Genable		CHR7D_613171556	7D	613171556	0.000757693	3.12051	0.030998		-2.89843	0.00778533	0.778533
YR	Genable		CHR7D_613689251	7D	613689251	0.000757693	3.12051	0.030998		-2.89843	0.00778533	0.778533
YR	Genable		CHR7D_613713076	7D	613713076	0.000757693	3.12051	0.030998		-2.89843	0.00778533	0.778533
YR	Genable		CHR7D_613713126	7D	613713126	0.000757693	3.12051	0.030998		-2.89843	0.00778533	0.778533
YR	Genable		CHR7D_613713185	7D	613713185	0.000757693	3.12051	0.030998		-2.89843	0.00778533	0.778533
YR	Genable		CHR6B_52150008	6B	52150008	0.000232339	3.63388	0.18624		-1.26595	0.00749372	0.749372
YR	Genable		CHR2D_109021782	2D	109021782	8.59235e-05	4.06589	0.0582157		-2.08806	0.00737518	0.737518
YR	Genable		CHR2D_105395604	2D	105395604	7.45345e-05	4.12764	0.0554435		-2.13514	0.00736586	0.736586
YR	Genable		CHR2D_3010397	2D	3010397	0.000429893	3.36664	0.0554435		-2.12148	0.00727192	0.727192
YR	Genable		CHR2D_3008734	2D	3008734	0.00042414	3.37249	0.0556956		-2.11662	0.00726961	0.726961
YR	Genable		CHR2D_3008757	2D	3008757	0.00042414	3.37249	0.0556956		-2.11662	0.00726961	0.726961
YR	Genable		CHR2D_109305872	2D	109305872	4.70418e-05	4.32752	0.0393145		-2.4898	0.00722366	0.722366
YR	Genable		CHR1B_19499089	1B	19499089	6.27811e-05	4.20217	0.0871976		1.70969	0.00717813	0.717813
YR	Genable		CHR6B_52283399	6B	52283399	0.000318826	3.49645	0.194556		-1.21786	0.00717087	0.717087
YR	Genable		CHR6B_51650180	6B	51650180	0.000350824	3.45491	0.183972		-1.24101	0.00713341	0.713341
YR	Genable		CHR6B_51650219	6B	51650219	0.000350824	3.45491	0.183972		-1.24101	0.00713341	0.713341
YR	Genable		CHR6B_51650260	6B	51650260	0.000350824	3.45491	0.183972		-1.24101	0.00713341	0.713341
YR	Genable		CHR2D_567416795	2D	567416795	6.73763e-05	4.17149	0.0241935		-3.12632	0.00711907	0.711907
YR	Genable		CHR6B_452580801	6B	452580801	0.000678592	3.16839	0.0146169		-3.95904	0.00696523	0.696523
YR	Genable		CHR7B_648260082	7B	648260082	7.79247e-05	4.10832	0.0138609		4.06255	0.00696019	0.696019
YR	Genable		CHR2D_4414641	2D	4414641	0.000590024	3.22913	0.0554435		-2.0738	0.00694872	0.694872
YR	Genable		CHR2D_4414644	2D	4414644	0.000590024	3.22913	0.0554435		-2.0738	0.00694872	0.694872
YR	Genable		CHR2D_4414669	2D	4414669	0.000590024	3.22913	0.0554435		-2.0738	0.00694872	0.694872
YR	Genable		CHR2D_4414680	2D	4414680	0.000590024	3.22913	0.0554435		-2.0738	0.00694872	0.694872
YR	Genable		CHR2D_4414704	2D	4414704	0.000590024	3.22913	0.0554435		-2.0738	0.00694872	0.694872
YR	Genable		CHR2D_4548077	2D	4548077	0.000590024	3.22913	0.0554435		-2.0738	0.00694872	0.694872
YR	Genable		CHR6D_34437403	6D	34437403	9.90503e-05	4.00414	0.0483871		-2.19653	0.00685419	0.685419
YR	Genable		CHR6B_52377160	6B	52377160	0.000505678	3.29613	0.186492		-1.19632	0.00669903	0.669903
YR	Genable		CHR6B_52384805	6B	52384805	0.000515614	3.28768	0.186744		-1.19189	0.00665643	0.665643
YR	Genable		CHR6B_52384841	6B	52384841	0.000515614	3.28768	0.186744		-1.19189	0.00665643	0.665643
YR	Genable		CHR3D_577862715	3D	577862715	0.000213274	3.67106	0.0166331		-3.6108	0.00657942	0.657942
YR	Genable		CHR6B_507187987	6B	507187987	0.000127637	3.89403	0.0146169		3.83969	0.00655159	0.655159
YR	Genable		CHR6B_54160384	6B	54160384	0.000593715	3.22642	0.185988		-1.18425	0.00655079	0.655079
YR	Genable		CHR6B_52384858	6B	52384858	0.000573508	3.24146	0.187248		-1.17887	0.00652532	0.652532
YR	Genable		CHR2D_3148633	2D	3148633	0.000805232	3.09408	0.0556956		-2.00517	0.0065242	0.65242
YR	Genable		CHR2D_4250988	2D	4250988	0.000908243	3.0418	0.0554435		-2.00712	0.00650907	0.650907
YR	Genable		CHR2D_4328721	2D	4328721	0.000951547	3.02157	0.0556956		-2.00101	0.00649716	0.649716
YR	Genable		CHR6D_4486122	6D	4486122	1.76634e-05	4.75293	0.0168851		-3.55978	0.00649005	0.649005
YR	Genable		CHR7A_113791471	7A	113791471	0.000523809	3.28083	0.0378024		-2.40293	0.00647978	0.647978
YR	Genable		CHR5B_467171844	5B	467171844	4.5165e-05	4.3452	0.0178931		3.44284	0.00642645	0.642645
YR	Genable		CHR6A_181013348	6A	181013348	0.000455891	3.34114	0.0120968		-4.13135	0.00629307	0.629307
YR	Genable		CHR2A_745764807	2A	745764807	0.000559827	3.25195	0.49874		-0.902485	0.00628219	0.628219
YR	Genable		CHR6B_54140004	6B	54140004	0.000839238	3.07611	0.18624		-1.15028	0.00618684	0.618684
YR	Genable		CHR3A_702690366	3A	702690366	0.000394863	3.40355	0.0715726		1.73153	0.00614676	0.614676
YR	Genable		CHR3A_702690429	3A	702690429	0.000394863	3.40355	0.0715726		1.73153	0.00614676	0.614676
YR	Genable		CHR1B_675415703	1B	675415703	0.000515047	3.28815	0.0337702		-2.46602	0.00612209	0.612209
YR	Genable		CHR6D_492676751	6D	492676751	0.000514231	3.28884	0.0650202		-1.80216	0.00609156	0.609156
YR	Genable		CHR3B_19006347	3B	19006347	0.000320138	3.49466	0.250756		-1.02175	0.00605137	0.605137
YR	Genable		CHR5B_559448016	5B	559448016	0.000174353	3.75857	0.333165		-0.936931	0.0060171	0.60171
YR	Genable		CHR7B_114063977	7B	114063977	0.000899758	3.04587	0.0698085		-1.71933	0.00592233	0.592233
YR	Genable		CHR6D_492678805	6D	492678805	0.000627221	3.20258	0.0642641		-1.78568	0.00591592	0.591592
YR	Genable		CHR1D_480103702	1D	480103702	0.000109885	3.95906	0.0660282		1.76131	0.00590238	0.590238
YR	Genable		CHR1D_8677328	1D	8677328	0.000142234	3.847	0.297631		-0.950759	0.00583013	0.583013
YR	Genable		CHR3B_172100509	3B	172100509	0.000402844	3.39486	0.0378024		2.27234	0.00579463	0.579463
YR	Genable		CHR7D_611401387	7D	611401387	2.10789e-05	4.67615	0.0201613		3.08337	0.00579453	0.579453
YR	Genable		CHR3D_532779488	3D	532779488	0.0001823	3.73921	0.0176411		3.2913	0.00579195	0.579195
YR	Genable		CHR3B_17733876	3B	17733876	0.000895986	3.0477	0.22001		-1.04478	0.00577925	0.577925
YR	Genable		CHR2A_160193315	2A	160193315	0.000198928	3.7013	0.0108367		4.17711	0.00577045	0.577045
YR	Genable		CHR7B_67147138	7B	67147138	0.000239072	3.62147	0.0136089		3.7034	0.00568022	0.568022
YR	Genable		CHR3B_17733886	3B	17733886	0.000796139	3.09901	0.212954		-1.04318	0.00562729	0.562729
YR	Genable		CHR6D_34437404	6D	34437404	0.000478765	3.31988	0.0488911		-1.97881	0.00561773	0.561773
YR	Genable		CHR1D_480734050	1D	480734050	0.000167745	3.77535	0.0652722		1.72687	0.00561342	0.561342
YR	Genable		CHR2B_51827247	2B	51827247	0.000614445	3.21152	0.119204		1.31617	0.0056115	0.56115
YR	Genable		CHR6B_52248171	6B	52248171	0.000878264	3.05638	0.120968		-1.30666	0.00560137	0.560137
YR	Genable		CHR2A_55665291	2A	55665291	0.000994427	3.00243	0.0105847		-4.15366	0.00557458	0.557458
YR	Genable		CHR1D_8874976	1D	8874976	0.00019719	3.70511	0.292591		-0.933328	0.00556281	0.556281
YR	Genable		CHR3A_703052978	3A	703052978	0.000476675	3.32178	0.078125		1.57828	0.0055351	0.55351
YR	Genable		CHR6B_52248108	6B	52248108	0.000963777	3.01602	0.120968		-1.2981	0.00552824	0.552824
YR	Genable		CHR1D_8874957	1D	8874957	0.000212573	3.67249	0.292087		-0.93012	0.00551903	0.551903
YR	Genable		CHR1D_8874972	1D	8874972	0.000212573	3.67249	0.292087		-0.93012	0.00551903	0.551903
YR	Genable		CHR1D_8875018	1D	8875018	0.000212573	3.67249	0.292087		-0.93012	0.00551903	0.551903
YR	Genable		CHR1D_8875030	1D	8875030	0.000212573	3.67249	0.292087		-0.93012	0.00551903	0.551903
YR	Genable		CHR1B_435791739	1B	435791739	0.000915441	3.03837	0.142641		-1.20899	0.00551498	0.551498
YR	Genable		CHR2A_207846155	2A	207846155	0.000290581	3.53673	0.0141129		-3.58158	0.00550663	0.550663
YR	Genable		CHR1D_8802655	1D	8802655	0.000234567	3.62973	0.292339		-0.925476	0.00546683	0.546683
YR	Genable		CHR1D_8802671	1D	8802671	0.000234567	3.62973	0.292339		-0.925476	0.00546683	0.546683
YR	Genable		CHR1D_8802672	1D	8802672	0.000234567	3.62973	0.292339		-0.925476	0.00546683	0.546683
YR	Genable		CHR1D_8802726	1D	8802726	0.000234567	3.62973	0.292339		-0.925476	0.00546683	0.546683
YR	Genable		CHR3A_703039504	3A	703039504	0.000514201	3.28887	0.077621		1.5716	0.00545588	0.545588
YR	Genable		CHR5B_700686132	5B	700686132	0.000319367	3.49571	0.143145		1.19965	0.00544611	0.544611
YR	Genable		CHR6D_34437437	6D	34437437	0.000662281	3.17896	0.0498992		-1.92848	0.00543985	0.543985
YR	Genable		CHR6D_5258435	6D	5258435	6.50417e-05	4.18681	0.0143649		-3.52833	0.00543814	0.543814
YR	Genable		CHR5B_469983889	5B	469983889	0.00034702	3.45965	0.0115927		3.92018	0.00543285	0.543285
YR	Genable		CHR5B_560386882	5B	560386882	0.000296209	3.5284	0.25378		-0.963313	0.00542192	0.542192
YR	Genable		CHR3A_703097505	3A	703097505	0.000564944	3.24799	0.0763609		1.57661	0.005409	0.5409
YR	Genable		CHR3B_15766879	3B	15766879	0.000365221	3.43744	0.333417		-0.887646	0.00540276	0.540276
YR	Genable		CHR5B_700686116	5B	700686116	0.000311463	3.50659	0.145917		1.18481	0.00539753	0.539753
YR	Genable		CHR3A_703095252	3A	703095252	0.000564274	3.24851	0.0766129		1.57158	0.00539081	0.539081
YR	Genable		CHR3A_703052855	3A	703052855	0.000556252	3.25473	0.078377		1.55521	0.00539028	0.539028
YR	Genable		CHR3A_703052898	3A	703052898	0.000556252	3.25473	0.078377		1.55521	0.00539028	0.539028
YR	Genable		CHR3A_703052919	3A	703052919	0.000556252	3.25473	0.078377		1.55521	0.00539028	0.539028
YR	Genable		CHR3A_703052932	3A	703052932	0.000556252	3.25473	0.078377		1.55521	0.00539028	0.539028
YR	Genable		CHR3A_703052933	3A	703052933	0.000556252	3.25473	0.078377		1.55521	0.00539028	0.539028
YR	Genable		CHR3B_765485512	3B	765485512	0.000276767	3.55789	0.207661		1.0299	0.00538457	0.538457
YR	Genable		CHR3A_702725415	3A	702725415	0.000581659	3.23533	0.0771169		1.56437	0.00537365	0.537365
YR	Genable		CHR1A_5244056	1A	5244056	0.000104585	3.98053	0.0340222		-2.30135	0.00537016	0.537016
YR	Genable		CHR5B_700685245	5B	700685245	0.00036544	3.43718	0.142641		1.19093	0.00535148	0.535148
YR	Genable		CHR3B_775725600	3B	775725600	0.000483411	3.31568	0.172883		1.10033	0.00534143	0.534143
YR	Genable		CHR2D_107244031	2D	107244031	0.000497341	3.30335	0.0360383		-2.22576	0.00530976	0.530976
YR	Genable		CHR3A_703052877	3A	703052877	0.000638576	3.19479	0.0768649		1.55434	0.00528907	0.528907
YR	Genable		CHR3A_703095421	3A	703095421	0.000606486	3.21718	0.078629		1.53804	0.00528743	0.528743
YR	Genable		CHR3B_775739818	3B	775739818	0.000574999	3.24033	0.173135		1.08731	0.00522178	0.522178
YR	Genable		CHR3B_775739847	3B	775739847	0.000574999	3.24033	0.173135		1.08731	0.00522178	0.522178
YR	Genable		CHR3B_775739861	3B	775739861	0.000574999	3.24033	0.173135		1.08731	0.00522178	0.522178
YR	Genable		CHR4A_619447808	4A	619447808	0.000260318	3.5845	0.016129		-3.26464	0.00521806	0.521806
YR	Genable		CHR3A_703097174	3A	703097174	0.000657041	3.18241	0.078629		1.52753	0.0052154	0.52154
YR	Genable		CHR3A_702699326	3A	702699326	0.000818619	3.08692	0.078881		1.52391	0.00520597	0.520597
YR	Genable		CHR3A_702699397	3A	702699397	0.000818619	3.08692	0.078881		1.52391	0.00520597	0.520597
YR	Genable		CHR7D_611401356	7D	611401356	6.66892e-05	4.17594	0.0216734		2.81728	0.00519235	0.519235
YR	Genable		CHR7D_611401359	7D	611401359	6.66892e-05	4.17594	0.0216734		2.81728	0.00519235	0.519235
YR	Genable		CHR7D_611401375	7D	611401375	6.66892e-05	4.17594	0.0216734		2.81728	0.00519235	0.519235
YR	Genable		CHR3A_702699347	3A	702699347	0.000819876	3.08625	0.0811492		1.49968	0.00517391	0.517391
YR	Genable		CHR7A_34099771	7A	34099771	0.000788664	3.10311	0.427167		0.826764	0.00516039	0.516039
YR	Genable		CHR2D_567634164	2D	567634164	0.000707565	3.15023	0.0234375		-2.69402	0.00512514	0.512514
YR	Genable		CHR3D_608037293	3D	608037293	0.000996118	3.00169	0.0201613		-2.89399	0.00510459	0.510459
YR	Genable		CHR7D_611401388	7D	611401388	6.7481e-05	4.17082	0.0196573		2.92519	0.00508747	0.508747
YR	Genable		CHR5D_448044513	5D	448044513	0.000763537	3.11717	0.0269657		-2.50666	0.00508656	0.508656
YR	Genable		CHR3A_703038591	3A	703038591	0.000790668	3.10201	0.0766129		1.52479	0.0050746	0.50746
YR	Genable		CHR3A_703216070	3A	703216070	0.00083042	3.0807	0.077621		1.51161	0.00504733	0.504733
YR	Genable		CHR3B_109837736	3B	109837736	0.00083861	3.07644	0.046119		-1.92096	0.00500843	0.500843
YR	Genable		CHR3A_703216118	3A	703216118	0.000908899	3.04148	0.078629		1.49501	0.0049957	0.49957
YR	Genable		CHR5A_10259146	5A	10259146	0.000898931	3.04627	0.0294859		-2.37296	0.00497151	0.497151
YR	Genable		CHR2A_695038230	2A	695038230	0.000628971	3.20137	0.354083		-0.836836	0.00494146	0.494146
YR	Genable		CHR7D_611401394	7D	611401394	0.000100238	3.99897	0.0206653		2.81039	0.00493175	0.493175
YR	Genable		CHR7B_87157653	7B	87157653	0.000571006	3.24336	0.210433		0.980634	0.00492959	0.492959
YR	Genable		CHR2A_138533959	2A	138533959	0.000950624	3.02199	0.0133569		3.47346	0.0049055	0.49055
YR	Genable		CHR2A_695038231	2A	695038231	0.000705148	3.15172	0.364667		-0.827365	0.00489312	0.489312
YR	Genable		CHR3B_540738426	3B	540738426	0.000948646	3.0229	0.015625		-3.21109	0.00489304	0.489304
YR	Genable		CHR2A_695038233	2A	695038233	0.000709615	3.14898	0.356351		-0.828554	0.00485805	0.485805
YR	Genable		CHR5B_560252193	5B	560252193	0.000655217	3.18362	0.256804		-0.906274	0.00483636	0.483636
YR	Genable		CHR3B_765357465	3B	765357465	0.000902917	3.04435	0.443548		0.794678	0.00480889	0.480889
YR	Genable		CHR3D_68538277	3D	68538277	0.000382263	3.41764	0.0292339		-2.34222	0.00480339	0.480339
YR	Genable		CHR3D_68538310	3D	68538310	0.000382263	3.41764	0.0292339		-2.34222	0.00480339	0.480339
YR	Genable		CHR5D_14606542	5D	14606542	0.000778664	3.10865	0.0105847		3.85501	0.00480177	0.480177
YR	Genable		CHR2B_727590381	2B	727590381	0.000221586	3.65446	0.0131048		3.46659	0.00479515	0.479515
YR	Genable		CHR3A_652159619	3A	652159619	0.000948039	3.02317	0.0103327		3.89713	0.00479164	0.479164
YR	Genable		CHR1B_436754566	1B	436754566	0.000906958	3.04241	0.107107		-1.27273	0.00477952	0.477952
YR	Genable		CHR5B_107135324	5B	107135324	0.000143462	3.84326	0.0110887		3.7505	0.00475895	0.475895
YR	Genable		CHR5B_480869458	5B	480869458	0.000417279	3.37957	0.0110887		-3.74565	0.00474664	0.474664
YR	Genable		CHR1D_479896479	1D	479896479	0.000364806	3.43794	0.0894657		1.37112	0.00472495	0.472495
YR	Genable		CHR6B_5572379	6B	5572379	0.000507535	3.29453	0.126764		1.17535	0.00471799	0.471799
YR	Genable		CHR6B_5572399	6B	5572399	0.000507535	3.29453	0.126764		1.17535	0.00471799	0.471799
YR	Genable		CHR1D_6979967	1D	6979967	0.000225368	3.64711	0.0120968		-3.57544	0.00471343	0.471343
YR	Genable		CHR6D_9308215	6D	9308215	0.000439774	3.35677	0.0257056		2.45885	0.00467172	0.467172
YR	Genable		CHR6D_9308218	6D	9308218	0.000439774	3.35677	0.0257056		2.45885	0.00467172	0.467172
YR	Genable		CHR2B_784670487	2B	784670487	0.000228623	3.64088	0.0350302		-2.11429	0.00466209	0.466209
YR	Genable		CHR3D_68538271	3D	68538271	0.000577529	3.23843	0.0246976		-2.49877	0.00464023	0.464023
YR	Genable		CHR3D_68538288	3D	68538288	0.000577529	3.23843	0.0246976		-2.49877	0.00464023	0.464023
YR	Genable		CHR4A_694082339	4A	694082339	0.000740104	3.13071	0.0120968		-3.52031	0.00456918	0.456918
YR	Genable		CHR4A_694082341	4A	694082341	0.000740104	3.13071	0.0120968		-3.52031	0.00456918	0.456918
YR	Genable		CHR2A_207786406	2A	207786406	0.000460714	3.33657	0.0141129		-3.26086	0.00456457	0.456457
YR	Genable		CHR6D_9856764	6D	9856764	0.000527632	3.27767	0.0345262		2.10532	0.00455848	0.455848
YR	Genable		CHR5B_600719540	5B	600719540	0.000992609	3.00322	0.0642641		-1.56272	0.00453083	0.453083
YR	Genable		CHR3A_696312283	3A	696312283	0.000974181	3.01136	0.3188		-0.821881	0.00452589	0.452589
YR	Genable		CHR5B_700296049	5B	700296049	0.000840273	3.07558	0.135081		1.11846	0.00450926	0.450926
YR	Genable		CHR5B_700468134	5B	700468134	0.000840273	3.07558	0.135081		1.11846	0.00450926	0.450926
YR	Genable		CHR5B_686472491	5B	686472491	0.000109325	3.96128	0.0360383		2.04869	0.00449852	0.449852
YR	Genable		CHR2A_766871851	2A	766871851	0.000495433	3.30502	0.0146169		3.16474	0.00445072	0.445072
YR	Genable		CHR2A_766873995	2A	766873995	0.000495433	3.30502	0.0146169		3.16474	0.00445072	0.445072
YR	Genable		CHR2A_766874027	2A	766874027	0.000495433	3.30502	0.0146169		3.16474	0.00445072	0.445072
YR	Genable		CHR6D_9309360	6D	9309360	0.000708774	3.14949	0.0279738		2.29867	0.0044328	0.44328
YR	Genable		CHR7A_673773686	7A	673773686	0.00043664	3.35988	0.114919		-1.18601	0.00441414	0.441414
YR	Genable		CHR7A_673773692	7A	673773692	0.00043664	3.35988	0.114919		-1.18601	0.00441414	0.441414
YR	Genable		CHR6A_619646881	6A	619646881	0.000248848	3.60407	0.0191532		2.75898	0.00441197	0.441197
YR	Genable		CHR5B_673946161	5B	673946161	0.00070692	3.15063	0.032006		-2.14804	0.00441046	0.441046
YR	Genable		CHR1A_5243768	1A	5243768	0.000488093	3.3115	0.0395665		-1.93349	0.00438302	0.438302
YR	Genable		CHR7D_107316169	7D	107316169	0.000162848	3.78822	0.0234375		2.4819	0.00434983	0.434983
YR	Genable		CHR1A_66978347	1A	66978347	0.000473404	3.32477	0.0143649		-3.1503	0.00433528	0.433528
YR	Genable		CHR1A_74165120	1A	74165120	0.000473404	3.32477	0.0143649		-3.1503	0.00433528	0.433528
YR	Genable		CHR6B_18814865	6B	18814865	0.000244681	3.6114	0.0246976		2.40183	0.00428719	0.428719
YR	Genable		CHR2B_660133069	2B	660133069	0.000238864	3.62185	0.0216734		-2.55401	0.00426726	0.426726
YR	Genable		CHR3A_21000091	3A	21000091	0.000736365	3.13291	0.0201613		2.63784	0.00424094	0.424094
YR	Genable		CHR1A_5243976	1A	5243976	0.000568918	3.24495	0.0393145		-1.90756	0.00424016	0.424016
YR	Genable		CHR2B_85310692	2B	85310692	0.000236728	3.62575	0.0131048		-3.25531	0.00422845	0.422845
YR	Genable		CHR1D_480042631	1D	480042631	0.000758755	3.1199	0.0884577		1.30133	0.00421292	0.421292
YR	Genable		CHR1D_480042668	1D	480042668	0.000758755	3.1199	0.0884577		1.30133	0.00421292	0.421292
YR	Genable		CHR6D_442237986	6D	442237986	0.000913747	3.03917	0.0735887		-1.40575	0.00415647	0.415647
YR	Genable		CHR2A_766504722	2A	766504722	0.000713776	3.14644	0.015121		2.99451	0.00412009	0.412009
YR	Genable		CHR7B_88475153	7B	88475153	0.000990541	3.00413	0.0378024		1.91347	0.00410887	0.410887
YR	Genable		CHR5B_15550276	5B	15550276	0.000891782	3.04974	0.28629		-0.804019	0.00407525	0.407525
YR	Genable		CHR5B_15550279	5B	15550279	0.000891782	3.04974	0.28629		-0.804019	0.00407525	0.407525
YR	Genable		CHR7B_76976297	7B	76976297	0.000910137	3.04089	0.0118448		3.35235	0.00405829	0.405829
YR	Genable		CHR7B_12645319	7B	12645319	0.000534436	3.2721	0.146169		1.02007	0.00400667	0.400667
YR	Genable		CHR6A_26318880	6A	26318880	0.000922049	3.03525	0.0433468		-1.76795	0.00399893	0.399893
YR	Genable		CHR6A_26318942	6A	26318942	0.000922049	3.03525	0.0433468		-1.76795	0.00399893	0.399893
YR	Genable		CHR6A_26318956	6A	26318956	0.000922049	3.03525	0.0433468		-1.76795	0.00399893	0.399893
YR	Genable		CHR7D_468027804	7D	468027804	0.000523161	3.28136	0.0206653		2.52388	0.00397744	0.397744
YR	Genable		CHR6B_18814870	6B	18814870	0.000418384	3.37842	0.0252016		2.27445	0.00392094	0.392094
YR	Genable		CHR1D_396173893	1D	396173893	0.000366606	3.4358	0.0103327		-3.513	0.00389361	0.389361
YR	Genable		CHR2A_757196507	2A	757196507	0.000838708	3.07639	0.061996		1.46268	0.00383847	0.383847
YR	Genable		CHR2B_686689506	2B	686689506	0.00039111	3.4077	0.0241935		2.29278	0.00382895	0.382895
YR	Genable		CHR2B_686689507	2B	686689507	0.00039111	3.4077	0.0241935		2.29278	0.00382895	0.382895
YR	Genable		CHR2B_686689536	2B	686689536	0.00039111	3.4077	0.0241935		2.29278	0.00382895	0.382895
YR	Genable		CHR2B_686689602	2B	686689602	0.00039111	3.4077	0.0241935		2.29278	0.00382895	0.382895
YR	Genable		CHR2B_686689922	2B	686689922	0.00039111	3.4077	0.0241935		2.29278	0.00382895	0.382895
YR	Genable		CHR1D_420974207	1D	420974207	0.000791578	3.10151	0.0201613		2.43304	0.00360798	0.360798
YR	Genable		CHR4A_612892487	4A	612892487	0.000195521	3.70881	0.016381		-2.69095	0.00359977	0.359977
YR	Genable		CHR7D_588142348	7D	588142348	0.000876413	3.05729	0.0194052		2.47037	0.00358284	0.358284
YR	Genable		CHR2B_8071137	2B	8071137	0.000187151	3.72781	0.0105847		-3.31813	0.00355743	0.355743
YR	Genable		CHR2B_8093673	2B	8093673	0.000187151	3.72781	0.0105847		-3.31813	0.00355743	0.355743
YR	Genable		CHR7D_588142324	7D	588142324	0.000884455	3.05332	0.0191532		2.46989	0.00353585	0.353585
YR	Genable		CHR2B_686689621	2B	686689621	0.000706279	3.15102	0.0244456		2.18144	0.00350131	0.350131
YR	Genable		CHR2B_686689639	2B	686689639	0.000706279	3.15102	0.0244456		2.18144	0.00350131	0.350131
YR	Genable		CHR2B_686689678	2B	686689678	0.000706279	3.15102	0.0244456		2.18144	0.00350131	0.350131
YR	Genable		CHR2B_799729136	2B	799729136	0.00093947	3.02712	0.0352823		1.82514	0.00349819	0.349819
YR	Genable		CHR3D_129986014	3D	129986014	0.000295958	3.52877	0.0113407		3.1669	0.00346935	0.346935
YR	Genable		CHR2B_784701561	2B	784701561	0.000865647	3.06266	0.0322581		-1.88863	0.00343544	0.343544
YR	Genable		CHR2B_784701567	2B	784701567	0.000865647	3.06266	0.0322581		-1.88863	0.00343544	0.343544
YR	Genable		CHR2B_784701583	2B	784701583	0.000865647	3.06266	0.0322581		-1.88863	0.00343544	0.343544
YR	Genable		CHR7D_4242234	7D	4242234	0.000551153	3.25873	0.0206653		2.34162	0.00342372	0.342372
YR	Genable		CHR1B_629986202	1B	629986202	0.000291827	3.53487	0.0176411		2.52753	0.00341572	0.341572
YR	Genable		CHR3D_7327254	3D	7327254	0.000648431	3.18814	0.016129		2.62989	0.00338622	0.338622
YR	Genable		CHR3D_7327259	3D	7327259	0.000648431	3.18814	0.016129		2.62989	0.00338622	0.338622
YR	Genable		CHR3D_7327274	3D	7327274	0.000648431	3.18814	0.016129		2.62989	0.00338622	0.338622
YR	Genable		CHR3D_7327300	3D	7327300	0.000648431	3.18814	0.016129		2.62989	0.00338622	0.338622
YR	Genable		CHR2B_686633913	2B	686633913	0.000547874	3.26132	0.0166331		2.58083	0.00336125	0.336125
YR	Genable		CHR2B_686633915	2B	686633915	0.000547874	3.26132	0.0166331		2.58083	0.00336125	0.336125
YR	Genable		CHR2B_686633959	2B	686633959	0.000547874	3.26132	0.0166331		2.58083	0.00336125	0.336125
YR	Genable		CHR2B_686689522	2B	686689522	0.000547874	3.26132	0.0166331		2.58083	0.00336125	0.336125
YR	Genable		CHR2B_686689591	2B	686689591	0.000547874	3.26132	0.0166331		2.58083	0.00336125	0.336125
YR	Genable		CHR2B_686689648	2B	686689648	0.000547874	3.26132	0.0166331		2.58083	0.00336125	0.336125
YR	Genable		CHR2B_686689846	2B	686689846	0.000547874	3.26132	0.0166331		2.58083	0.00336125	0.336125
YR	Genable		CHR2B_686689874	2B	686689874	0.000547874	3.26132	0.0166331		2.58083	0.00336125	0.336125
YR	Genable		CHR2B_686689946	2B	686689946	0.000547874	3.26132	0.0166331		2.58083	0.00336125	0.336125
YR	Genable		CHR2B_686689979	2B	686689979	0.000547874	3.26132	0.0166331		2.58083	0.00336125	0.336125
YR	Genable		CHR2B_686690000	2B	686690000	0.000547874	3.26132	0.0166331		2.58083	0.00336125	0.336125
YR	Genable		CHR2B_686690001	2B	686690001	0.000547874	3.26132	0.0166331		2.58083	0.00336125	0.336125
YR	Genable		CHR2B_686690078	2B	686690078	0.000547874	3.26132	0.0166331		2.58083	0.00336125	0.336125
YR	Genable		CHR2B_686764793	2B	686764793	0.000547874	3.26132	0.0166331		2.58083	0.00336125	0.336125
YR	Genable		CHR2B_686764817	2B	686764817	0.000547874	3.26132	0.0166331		2.58083	0.00336125	0.336125
YR	Genable		CHR2B_686764838	2B	686764838	0.000547874	3.26132	0.0166331		2.58083	0.00336125	0.336125
YR	Genable		CHR2B_687135465	2B	687135465	0.000547874	3.26132	0.0166331		2.58083	0.00336125	0.336125
YR	Genable		CHR2B_687785064	2B	687785064	0.000547874	3.26132	0.0166331		2.58083	0.00336125	0.336125
YR	Genable		CHR2B_687785127	2B	687785127	0.000547874	3.26132	0.0166331		2.58083	0.00336125	0.336125
YR	Genable		CHR2B_686690024	2B	686690024	0.000583253	3.23414	0.0168851		2.55543	0.00334448	0.334448
YR	Genable		CHR2D_645629672	2D	645629672	0.000419634	3.37713	0.0126008		2.93553	0.00330794	0.330794
YR	Genable		CHR3B_764127588	3B	764127588	0.00063171	3.19948	0.0428427		1.59235	0.00320799	0.320799
YR	Genable		CHR1B_629986226	1B	629986226	0.000641059	3.1931	0.0196573		2.28181	0.00309566	0.309566
YR	Genable		CHR1B_629986255	1B	629986255	0.000641059	3.1931	0.0196573		2.28181	0.00309566	0.309566
YR	Genable		CHR1B_629986257	1B	629986257	0.000641059	3.1931	0.0196573		2.28181	0.00309566	0.309566
YR	Genable		CHR1B_629986266	1B	629986266	0.000641059	3.1931	0.0196573		2.28181	0.00309566	0.309566
YR	Genable		CHR1B_629986286	1B	629986286	0.000641059	3.1931	0.0196573		2.28181	0.00309566	0.309566
YR	Genable		CHR2B_687785144	2B	687785144	0.000988879	3.00486	0.016129		2.50224	0.00306547	0.306547
YR	Genable		CHR3B_761743961	3B	761743961	0.000936777	3.02836	0.0498992		-1.38473	0.00280471	0.280471
LR	Gapit	only_K	Chr1A_11338370	1	11338370	0.000393555	3.40499	0.133065	1984	0.235307	0.427493
LR	Gapit	only_K	Chr1A_11338418	1	11338418	0.000172753	3.76258	0.212954	1984	0.129972	0.396742
LR	Gapit	only_K	Chr1A_11339042	1	11339042	4.84966e-05	4.31429	0.0723286	1984	0.0486491	0.607113
LR	Gapit	only_K	Chr1A_11341756	1	11341756	9.36353e-05	4.02856	0.15121	1984	0.0805112	0.457268
LR	Gapit	only_K	Chr1A_581343271	1	581343271	0.000564282	3.2485	0.0274698	1984	0.279918	-0.897179
LR	Gapit	only_K	Chr1B_26310535	2	26310535	0.000843799	3.07376	0.016381	1984	0.340093	-1.41891
LR	Gapit	only_K	Chr1B_27660422	2	27660422	0.000462491	3.3349	0.016129	1984	0.255774	-1.42837
LR	Gapit	only_K	Chr1B_28234260	2	28234260	0.000364889	3.43784	0.016381	1984	0.224104	-1.45523
LR	Gapit	only_K	Chr1B_28276370	2	28276370	0.000364889	3.43784	0.016381	1984	0.224104	-1.45523
LR	Gapit	only_K	Chr1B_28470645	2	28470645	0.000389131	3.4099	0.0166331	1984	0.234213	-1.43237
LR	Gapit	only_K	Chr1B_28679980	2	28679980	0.000870139	3.06041	0.015121	1984	0.344556	-1.40892
LR	Gapit	only_K	Chr1B_28683922	2	28683922	0.000194608	3.71084	0.0181452	1984	0.142844	-1.37687
LR	Gapit	only_K	Chr1B_29104859	2	29104859	0.000454977	3.34201	0.016129	1984	0.255774	-1.41681
LR	Gapit	only_K	Chr1B_30222918	2	30222918	0.000454977	3.34201	0.016129	1984	0.255774	-1.41681
LR	Gapit	only_K	Chr1B_30346892	2	30346892	0.000497444	3.30326	0.016381	1984	0.255774	-1.42517
LR	Gapit	only_K	Chr1B_30444246	2	30444246	1.42638e-11	10.8458	0.0128528	1984	3.67938e-08	2.5766
LR	Gapit	only_K	Chr1B_30676623	2	30676623	0.00044976	3.34702	0.015625	1984	0.255774	-1.43971
LR	Gapit	only_K	Chr1B_30969672	2	30969672	0.000357742	3.44643	0.015877	1984	0.224104	-1.48034
LR	Gapit	only_K	Chr1B_31087278	2	31087278	0.000357742	3.44643	0.015877	1984	0.224104	-1.48034
LR	Gapit	only_K	Chr1B_34688529	2	34688529	0.000925566	3.03359	0.0166331	1984	0.357548	-1.40995
LR	Gapit	only_K	Chr1B_36369129	2	36369129	7.08108e-05	4.1499	0.0211694	1984	0.0621135	-1.33709
LR	Gapit	only_K	Chr1B_36401065	2	36401065	0.000840563	3.07543	0.0206653	1984	0.340093	-1.16548
LR	Gapit	only_K	Chr1B_36401074	2	36401074	0.000840563	3.07543	0.0206653	1984	0.340093	-1.16548
LR	Gapit	only_K	Chr1B_36403844	2	36403844	0.000840563	3.07543	0.0206653	1984	0.340093	-1.16548
LR	Gapit	only_K	Chr1B_36403868	2	36403868	0.000840563	3.07543	0.0206653	1984	0.340093	-1.16548
LR	Gapit	only_K	Chr1B_36403894	2	36403894	0.000840563	3.07543	0.0206653	1984	0.340093	-1.16548
LR	Gapit	only_K	Chr1B_41621346	2	41621346	0.000383473	3.41627	0.0199093	1984	0.232356	-1.28705
LR	Gapit	only_K	Chr1B_41770533	2	41770533	0.000463372	3.33407	0.0196573	1984	0.255774	-1.25794
LR	Gapit	only_K	Chr1D_14636918	3	14636918	0.000215971	3.66561	0.0511593	1984	0.149988	-0.895867
LR	Gapit	only_K	Chr1D_14636962	3	14636962	0.000215971	3.66561	0.0511593	1984	0.149988	-0.895867
LR	Gapit	only_K	Chr1D_14636965	3	14636965	0.000215971	3.66561	0.0511593	1984	0.149988	-0.895867
LR	Gapit	only_K	Chr1D_14636973	3	14636973	0.000215971	3.66561	0.0511593	1984	0.149988	-0.895867
LR	Gapit	only_K	Chr1D_14636977	3	14636977	0.000215971	3.66561	0.0511593	1984	0.149988	-0.895867
LR	Gapit	only_K	Chr1D_14636998	3	14636998	0.000215971	3.66561	0.0511593	1984	0.149988	-0.895867
LR	Gapit	only_K	Chr2A_1845266	4	1845266	0.000930672	3.0312	0.0105847	1984	0.357548	1.27512
LR	Gapit	only_K	Chr2A_16203797	4	16203797	0.000786616	3.10424	0.277974	1984	0.333418	0.409802
LR	Gapit	only_K	Chr2A_590679606	4	590679606	0.000318205	3.49729	0.0183972	1984	0.211239	-1.58162
LR	Gapit	only_K	Chr2A_608863587	4	608863587	0.000861341	3.06482	0.405242	1984	0.344449	0.315813
LR	Gapit	only_K	Chr2A_609001657	4	609001657	0.000967244	3.01446	0.403226	1984	0.36538	0.311291
LR	Gapit	only_K	Chr2A_778825047	4	778825047	0.000926784	3.03302	0.1313	1984	0.357548	-0.402439
LR	Gapit	only_K	Chr2A_778825103	4	778825103	0.000926784	3.03302	0.1313	1984	0.357548	-0.402439
LR	Gapit	only_K	Chr2B_678580254	5	678580254	0.000480933	3.31792	0.450857	1984	0.255774	0.326447
LR	Gapit	only_K	Chr2B_678836506	5	678836506	0.000159562	3.79707	0.326361	1984	0.124187	0.361094
LR	Gapit	only_K	Chr2B_678920949	5	678920949	0.00036308	3.44	0.30872	1984	0.224104	0.344133
LR	Gapit	only_K	Chr2B_678922437	5	678922437	0.000444633	3.352	0.309224	1984	0.255687	0.338918
LR	Gapit	only_K	Chr2B_679920929	5	679920929	0.000358143	3.44594	0.306452	1984	0.224104	0.352342
LR	Gapit	only_K	Chr2B_680319299	5	680319299	0.00067809	3.16871	0.426411	1984	0.298891	0.318988
LR	Gapit	only_K	Chr2B_680776409	5	680776409	0.000927153	3.03285	0.431452	1984	0.357548	0.309994
LR	Gapit	only_K	Chr2B_681084590	5	681084590	0.0008373	3.07712	0.428427	1984	0.340093	0.312624
LR	Gapit	only_K	Chr2D_28420983	6	28420983	0.000489024	3.31067	0.0811492	1984	0.255774	0.611771
LR	Gapit	only_K	Chr2D_640747916	6	640747916	0.000862237	3.06437	0.0183972	1984	0.344449	1.16371
LR	Gapit	only_K	Chr3A_577507436	7	577507436	0.000177128	3.75171	0.0345262	1984	0.132152	0.921537
LR	Gapit	only_K	Chr3B_53685308	8	53685308	1.95449e-05	4.70897	0.0279738	1984	0.0239152	1.27715
LR	Gapit	only_K	Chr3B_462389327	8	462389327	9.52733e-06	5.02103	0.0269657	1984	0.0121149	1.41406
LR	Gapit	only_K	Chr3B_462389591	8	462389591	5.02992e-05	4.29844	0.0262097	1984	0.0499029	1.37602
LR	Gapit	only_K	Chr3B_462389618	8	462389618	0.000320664	3.49395	0.0254536	1984	0.211318	1.22604
LR	Gapit	only_K	Chr3B_803423315	8	803423315	0.000520332	3.28372	0.321321	1984	0.263916	-0.343315
LR	Gapit	only_K	Chr3B_803423329	8	803423329	0.000620108	3.20753	0.321573	1984	0.28645	-0.338756
LR	Gapit	only_K	Chr3B_803424960	8	803424960	0.000681984	3.16623	0.322077	1984	0.298891	-0.336034
LR	Gapit	only_K	Chr3B_803424966	8	803424966	0.000681984	3.16623	0.322077	1984	0.298891	-0.336034
LR	Gapit	only_K	Chr3B_803424967	8	803424967	0.000681984	3.16623	0.322077	1984	0.298891	-0.336034
LR	Gapit	only_K	Chr3B_804230815	8	804230815	0.000485504	3.31381	0.319808	1984	0.255774	-0.345484
LR	Gapit	only_K	Chr3D_361923066	9	361923066	7.08626e-05	4.14958	0.0229335	1984	0.0621135	-1.25992
LR	Gapit	only_K	Chr3D_361923112	9	361923112	8.74969e-05	4.05801	0.0231855	1984	0.0759565	-1.23813
LR	Gapit	only_K	Chr4A_681101889	10	681101889	0.000593838	3.22633	0.030494	1984	0.280065	-0.782106
LR	Gapit	only_K	Chr4A_736685552	10	736685552	0.00028637	3.54307	0.0216734	1984	0.192943	-1.28281
LR	Gapit	only_K	Chr4B_19209086	11	19209086	0.000792218	3.10116	0.258821	1984	0.334223	0.332528
LR	Gapit	only_K	Chr4B_554311160	11	554311160	0.000149702	3.82477	0.0176411	1984	0.121762	-1.6005
LR	Gapit	only_K	Chr4D_15502361	12	15502361	7.92954e-06	5.10075	0.0133569	1984	0.0103745	-1.61953
LR	Gapit	only_K	Chr4D_147800578	12	147800578	0.000628215	3.20189	0.0141129	1984	0.28645	1.19902
LR	Gapit	only_K	Chr4D_167634708	12	167634708	0.000628215	3.20189	0.0141129	1984	0.28645	1.19902
LR	Gapit	only_K	Chr4D_177039138	12	177039138	0.000628215	3.20189	0.0141129	1984	0.28645	1.19902
LR	Gapit	only_K	Chr4D_223181650	12	223181650	0.000628215	3.20189	0.0141129	1984	0.28645	1.19902
LR	Gapit	only_K	Chr4D_396886837	12	396886837	5.40695e-05	4.26705	0.0115927	1984	0.0530604	-1.75108
LR	Gapit	only_K	Chr5A_459200661	13	459200661	0.000327742	3.48447	0.061996	1984	0.214417	-0.611854
LR	Gapit	only_K	Chr5A_459494322	13	459494322	0.000170382	3.76858	0.0685484	1984	0.129425	-0.619746
LR	Gapit	only_K	Chr5A_462003034	13	462003034	0.000749567	3.12519	0.351058	1984	0.320726	0.330909
LR	Gapit	only_K	Chr5A_465134485	13	465134485	0.000962842	3.01644	0.242692	1984	0.365245	0.369434
LR	Gapit	only_K	Chr5A_467060336	13	467060336	0.00048513	3.31414	0.241179	1984	0.255774	0.392686
LR	Gapit	only_K	Chr5A_469533486	13	469533486	0.000490164	3.30966	0.24244	1984	0.255774	0.390158
LR	Gapit	only_K	Chr5A_469583916	13	469583916	0.000694651	3.15823	0.381048	1984	0.301515	0.331382
LR	Gapit	only_K	Chr5A_593642154	13	593642154	0.000242726	3.61488	0.016129	1984	0.167282	-1.54276
LR	Gapit	only_K	Chr5A_619708723	13	619708723	0.000148314	3.82882	0.0110887	1984	0.121729	-1.36833
LR	Gapit	only_K	Chr5A_621816621	13	621816621	7.00657e-05	4.15449	0.0105847	1984	0.0621135	-1.45692
LR	Gapit	only_K	Chr5A_621817306	13	621817306	3.99497e-05	4.39849	0.0126008	1984	0.0409861	-1.3851
LR	Gapit	only_K	Chr5A_621822443	13	621822443	3.99497e-05	4.39849	0.0126008	1984	0.0409861	-1.3851
LR	Gapit	only_K	Chr5A_622343655	13	622343655	3.99497e-05	4.39849	0.0126008	1984	0.0409861	-1.3851
LR	Gapit	only_K	Chr5A_622412216	13	622412216	1.04672e-05	4.98017	0.0110887	1984	0.0131251	-1.57311
LR	Gapit	only_K	Chr5A_622412244	13	622412244	7.00657e-05	4.15449	0.0105847	1984	0.0621135	-1.45692
LR	Gapit	only_K	Chr5A_622602643	13	622602643	3.99497e-05	4.39849	0.0126008	1984	0.0409861	-1.3851
LR	Gapit	only_K	Chr5A_622602706	13	622602706	3.99497e-05	4.39849	0.0126008	1984	0.0409861	-1.3851
LR	Gapit	only_K	Chr5A_622602725	13	622602725	3.99497e-05	4.39849	0.0126008	1984	0.0409861	-1.3851
LR	Gapit	only_K	Chr5A_622609534	13	622609534	3.99497e-05	4.39849	0.0126008	1984	0.0409861	-1.3851
LR	Gapit	only_K	Chr5A_622609567	13	622609567	3.99497e-05	4.39849	0.0126008	1984	0.0409861	-1.3851
LR	Gapit	only_K	Chr5A_622717375	13	622717375	3.99497e-05	4.39849	0.0126008	1984	0.0409861	-1.3851
LR	Gapit	only_K	Chr5A_622855549	13	622855549	3.99497e-05	4.39849	0.0126008	1984	0.0409861	-1.3851
LR	Gapit	only_K	Chr5A_623081428	13	623081428	3.99497e-05	4.39849	0.0126008	1984	0.0409861	-1.3851
LR	Gapit	only_K	Chr5A_623385256	13	623385256	3.99497e-05	4.39849	0.0126008	1984	0.0409861	-1.3851
LR	Gapit	only_K	Chr5A_623386076	13	623386076	3.99497e-05	4.39849	0.0126008	1984	0.0409861	-1.3851
LR	Gapit	only_K	Chr5A_623389296	13	623389296	3.99497e-05	4.39849	0.0126008	1984	0.0409861	-1.3851
LR	Gapit	only_K	Chr5A_623716591	13	623716591	7.00657e-05	4.15449	0.0105847	1984	0.0621135	-1.45692
LR	Gapit	only_K	Chr5A_623726683	13	623726683	4.19804e-05	4.37695	0.0136089	1984	0.0425856	-1.46638
LR	Gapit	only_K	Chr5A_623730615	13	623730615	7.00657e-05	4.15449	0.0105847	1984	0.0621135	-1.45692
LR	Gapit	only_K	Chr5A_623905238	13	623905238	7.00657e-05	4.15449	0.0105847	1984	0.0621135	-1.45692
LR	Gapit	only_K	Chr5A_623905270	13	623905270	0.000158785	3.79919	0.0176411	1984	0.124187	-1.35082
LR	Gapit	only_K	Chr5A_623905344	13	623905344	0.000158785	3.79919	0.0176411	1984	0.124187	-1.35082
LR	Gapit	only_K	Chr5A_624027213	13	624027213	7.00657e-05	4.15449	0.0105847	1984	0.0621135	-1.45692
LR	Gapit	only_K	Chr5A_624027289	13	624027289	7.00657e-05	4.15449	0.0105847	1984	0.0621135	-1.45692
LR	Gapit	only_K	Chr5A_624045874	13	624045874	0.000272397	3.5648	0.0110887	1984	0.184908	-1.3286
LR	Gapit	only_K	Chr5A_624045923	13	624045923	0.000158785	3.79919	0.0176411	1984	0.124187	-1.35082
LR	Gapit	only_K	Chr5A_624081594	13	624081594	0.000178577	3.74817	0.0108367	1984	0.132152	-1.3596
LR	Gapit	only_K	Chr5A_624394515	13	624394515	6.14019e-05	4.21182	0.0100806	1984	0.059608	-1.5083
LR	Gapit	only_K	Chr5A_655038415	13	655038415	0.000586948	3.2314	0.0143649	1984	0.280065	-1.13578
LR	Gapit	only_K	Chr5A_655051479	13	655051479	0.000337834	3.4713	0.0138609	1984	0.217862	-1.1949
LR	Gapit	only_K	Chr5A_655052749	13	655052749	0.000586948	3.2314	0.0143649	1984	0.280065	-1.13578
LR	Gapit	only_K	Chr5A_655055231	13	655055231	0.000586948	3.2314	0.0143649	1984	0.280065	-1.13578
LR	Gapit	only_K	Chr5A_655070356	13	655070356	0.000337834	3.4713	0.0138609	1984	0.217862	-1.1949
LR	Gapit	only_K	Chr5A_655070369	13	655070369	0.000928631	3.03216	0.0120968	1984	0.357548	-1.17216
LR	Gapit	only_K	Chr5B_14446181	14	14446181	0.000564187	3.24858	0.0602319	1984	0.279918	-0.597334
LR	Gapit	only_K	Chr5B_28942307	14	28942307	0.000951022	3.02181	0.49496	1984	0.363818	0.306073
LR	Gapit	only_K	Chr5B_32443622	14	32443622	0.000911052	3.04046	0.499244	1984	0.357548	-0.309041
LR	Gapit	only_K	Chr5B_399167738	14	399167738	0.000686666	3.16325	0.496472	1984	0.299489	-0.33085
LR	Gapit	only_K	Chr5B_399496143	14	399496143	0.000499716	3.30128	0.495464	1984	0.255774	-0.338495
LR	Gapit	only_K	Chr5B_537207516	14	537207516	0.000595598	3.22505	0.09375	1984	0.280065	-0.518618
LR	Gapit	only_K	Chr5B_537207530	14	537207530	0.000595598	3.22505	0.09375	1984	0.280065	-0.518618
LR	Gapit	only_K	Chr5B_537207546	14	537207546	0.000595598	3.22505	0.09375	1984	0.280065	-0.518618
LR	Gapit	only_K	Chr5B_552975827	14	552975827	0.000379935	3.42029	0.0146169	1984	0.231768	-1.1623
LR	Gapit	only_K	Chr5B_554956487	14	554956487	0.000544192	3.26425	0.299395	1984	0.272952	-0.346378
LR	Gapit	only_K	Chr5B_554958965	14	554958965	0.000170592	3.76804	0.298639	1984	0.129425	-0.376467
LR	Gapit	only_K	Chr5B_555026917	14	555026917	0.000577462	3.23848	0.290827	1984	0.280065	-0.341207
LR	Gapit	only_K	Chr5B_555090220	14	555090220	0.000429835	3.3667	0.285534	1984	0.251992	-0.351313
LR	Gapit	only_K	Chr5B_557212945	14	557212945	0.000651724	3.18594	0.289819	1984	0.294198	-0.344206
LR	Gapit	only_K	Chr5B_558083273	14	558083273	0.000361468	3.44193	0.196321	1984	0.224104	0.369764
LR	Gapit	only_K	Chr5B_558086578	14	558086578	0.000466224	3.3314	0.197581	1984	0.255774	0.360945
LR	Gapit	only_K	Chr5B_558086594	14	558086594	0.000466224	3.3314	0.197581	1984	0.255774	0.360945
LR	Gapit	only_K	Chr5B_596251538	14	596251538	0.000481771	3.31716	0.171875	1984	0.255774	-0.374984
LR	Gapit	only_K	Chr5B_596257581	14	596257581	0.000489439	3.3103	0.171875	1984	0.255774	-0.374734
LR	Gapit	only_K	Chr5B_596459601	14	596459601	0.000957097	3.01904	0.12374	1984	0.364597	-0.410501
LR	Gapit	only_K	Chr5B_596459744	14	596459744	0.000495729	3.30476	0.12374	1984	0.255774	-0.433311
LR	Gapit	only_K	Chr5B_598676074	14	598676074	0.000443938	3.35268	0.499244	1984	0.255687	0.317985
LR	Gapit	only_K	Chr5B_632398235	14	632398235	0.000477198	3.3213	0.0967742	1984	0.255774	-0.5881
LR	Gapit	only_K	Chr5D_479556466	15	479556466	0.000626401	3.20315	0.0224294	1984	0.28645	1.09375
LR	Gapit	only_K	Chr6A_617496769	16	617496769	0.000637173	3.19574	0.250252	1984	0.289075	-0.374935
LR	Gapit	only_K	Chr6A_617928444	16	617928444	0.000766773	3.11533	0.414567	1984	0.32654	0.305819
LR	Gapit	only_K	Chr6A_618000932	16	618000932	0.000135455	3.86821	0.0385585	1984	0.113234	1.01487
LR	Gapit	only_K	Chr6A_621875764	16	621875764	9.97476e-13	12.0011	0.0120968	1984	2.905e-09	3.52761
LR	Gapit	only_K	Chr6A_621875765	16	621875765	9.97476e-13	12.0011	0.0120968	1984	2.905e-09	3.52761
LR	Gapit	only_K	Chr6A_621875768	16	621875768	9.97476e-13	12.0011	0.0120968	1984	2.905e-09	3.52761
LR	Gapit	only_K	Chr6A_621875835	16	621875835	9.97476e-13	12.0011	0.0120968	1984	2.905e-09	3.52761
LR	Gapit	only_K	Chr6B_17802665	17	17802665	0.000834589	3.07853	0.235383	1984	0.340093	-0.361236
LR	Gapit	only_K	Chr6B_29973795	17	29973795	1.57842e-07	6.80178	0.0128528	1984	0.000274046	2.30142
LR	Gapit	only_K	Chr6B_29973800	17	29973800	1.57842e-07	6.80178	0.0128528	1984	0.000274046	2.30142
LR	Gapit	only_K	Chr6B_29973882	17	29973882	1.57842e-07	6.80178	0.0128528	1984	0.000274046	2.30142
LR	Gapit	only_K	Chr6B_29973886	17	29973886	3.42264e-07	6.46564	0.0143649	1984	0.000572233	2.08693
LR	Gapit	only_K	Chr6B_40596215	17	40596215	0.00047009	3.32782	0.0100806	1984	0.255774	-1.31341
LR	Gapit	only_K	Chr6B_40596232	17	40596232	6.57346e-05	4.18221	0.0108367	1984	0.0621135	-1.40839
LR	Gapit	only_K	Chr6B_45583663	17	45583663	0.000427064	3.36951	0.0168851	1984	0.251992	-1.41685
LR	Gapit	only_K	Chr6B_490980286	17	490980286	2.18176e-09	8.66119	0.031502	1984	4.47673e-06	1.79206
LR	Gapit	only_K	Chr6B_490980290	17	490980290	9.16714e-09	8.03777	0.031754	1984	1.79921e-05	1.70052
LR	Gapit	only_K	Chr6B_490980317	17	490980317	2.18176e-09	8.66119	0.031502	1984	4.47673e-06	1.79206
LR	Gapit	only_K	Chr6B_490981352	17	490981352	7.26363e-08	7.13885	0.0289819	1984	0.000136915	1.78208
LR	Gapit	only_K	Chr6B_721639559	17	721639559	2.60146e-07	6.58478	0.015121	1984	0.000443147	1.58984
LR	Gapit	only_K	Chr6B_721661195	17	721661195	1.9602e-05	4.7077	0.0241935	1984	0.0239152	1.00743
LR	Gapit	only_K	Chr6B_721739561	17	721739561	4.70282e-09	8.32764	0.015877	1984	9.43522e-06	1.75814
LR	Gapit	only_K	Chr6B_721739585	17	721739585	7.75982e-08	7.11015	0.0199093	1984	0.000142975	1.45935
LR	Gapit	only_K	Chr6B_722084249	17	722084249	0.000996761	3.00141	0.111391	1984	0.374282	0.472347
LR	Gapit	only_K	Chr6B_722531242	17	722531242	1.93781e-06	5.71269	0.0854335	1984	0.00261121	0.825984
LR	Gapit	only_K	Chr6B_722883731	17	722883731	8.04375e-06	5.09454	0.0856855	1984	0.0103745	0.784096
LR	Gapit	only_K	Chr6B_724039929	17	724039929	8.03655e-07	6.09493	0.0859375	1984	0.00131921	0.875637
LR	Gapit	only_K	Chr6B_724341331	17	724341331	8.93192e-07	6.04906	0.0791331	1984	0.00144	0.727576
LR	Gapit	only_K	Chr6B_724341355	17	724341355	1.506e-06	5.82217	0.0796371	1984	0.0020601	0.707692
LR	Gapit	only_K	Chr6B_724341358	17	724341358	1.506e-06	5.82217	0.0796371	1984	0.0020601	0.707692
LR	Gapit	only_K	Chr6B_724341360	17	724341360	1.506e-06	5.82217	0.0796371	1984	0.0020601	0.707692
LR	Gapit	only_K	Chr6B_724341378	17	724341378	1.506e-06	5.82217	0.0796371	1984	0.0020601	0.707692
LR	Gapit	only_K	Chr6B_724341380	17	724341380	1.506e-06	5.82217	0.0796371	1984	0.0020601	0.707692
LR	Gapit	only_K	Chr6B_724341399	17	724341399	1.506e-06	5.82217	0.0796371	1984	0.0020601	0.707692
LR	Gapit	only_K	Chr6B_724341407	17	724341407	1.506e-06	5.82217	0.0796371	1984	0.0020601	0.707692
LR	Gapit	only_K	Chr6B_724417696	17	724417696	1.41772e-06	5.84841	0.0821573	1984	0.0020601	0.723456
LR	Gapit	only_K	Chr6B_724417703	17	724417703	1.41772e-06	5.84841	0.0821573	1984	0.0020601	0.723456
LR	Gapit	only_K	Chr6B_724417707	17	724417707	1.41772e-06	5.84841	0.0821573	1984	0.0020601	0.723456
LR	Gapit	only_K	Chr6B_724685109	17	724685109	7.27927e-08	7.13791	0.0269657	1984	0.000136915	1.27644
LR	Gapit	only_K	Chr6B_725013581	17	725013581	6.47891e-13	12.1885	0.0448589	1984	2.16643e-09	1.53893
LR	Gapit	only_K	Chr6B_725013662	17	725013662	2.85021e-14	13.5451	0.0438508	1984	1.4519e-10	1.63577
LR	Gapit	only_K	Chr6B_725013676	17	725013676	2.85021e-14	13.5451	0.0438508	1984	1.4519e-10	1.63577
LR	Gapit	only_K	Chr6B_725081102	17	725081102	8.63243e-16	15.0639	0.0357863	1984	2.51052e-11	1.75702
LR	Gapit	only_K	Chr6B_725081146	17	725081146	1.11229e-15	14.9538	0.0367944	1984	2.51052e-11	1.73309
LR	Gapit	only_K	Chr6B_726384224	17	726384224	3.26918e-15	14.4856	0.0297379	1984	4.91919e-11	1.77781
LR	Gapit	only_K	Chr6B_726384251	17	726384251	3.26918e-15	14.4856	0.0297379	1984	4.91919e-11	1.77781
LR	Gapit	only_K	Chr6B_726409771	17	726409771	9.99163e-11	10.0004	0.0171371	1984	2.31301e-07	1.893
LR	Gapit	only_K	Chr6B_726690566	17	726690566	2.12419e-14	13.6728	0.0241935	1984	1.27852e-10	1.95829
LR	Gapit	only_K	Chr6B_726980132	17	726980132	2.12419e-14	13.6728	0.0241935	1984	1.27852e-10	1.95829
LR	Gapit	only_K	Chr6B_728450946	17	728450946	1.9826e-12	11.7028	0.0292339	1984	5.5936e-09	1.6366
LR	Gapit	only_K	Chr6B_729131465	17	729131465	2.12419e-14	13.6728	0.0241935	1984	1.27852e-10	1.95829
LR	Gapit	only_K	Chr6B_729275959	17	729275959	2.12419e-14	13.6728	0.0241935	1984	1.27852e-10	1.95829
LR	Gapit	only_K	Chr6B_729276024	17	729276024	2.12419e-14	13.6728	0.0241935	1984	1.27852e-10	1.95829
LR	Gapit	only_K	Chr6B_729878468	17	729878468	2.12419e-14	13.6728	0.0241935	1984	1.27852e-10	1.95829
LR	Gapit	only_K	Chr6B_730222437	17	730222437	2.12419e-14	13.6728	0.0241935	1984	1.27852e-10	1.95829
LR	Gapit	only_K	Chr6B_730222445	17	730222445	2.12419e-14	13.6728	0.0241935	1984	1.27852e-10	1.95829
LR	Gapit	only_K	Chr6D_492412529	18	492412529	7.47636e-14	13.1263	0.0110887	1984	2.59611e-10	3.82217
LR	Gapit	only_K	Chr6D_492412544	18	492412544	3.05551e-14	13.5149	0.0113407	1984	1.4519e-10	3.91211
LR	Gapit	only_K	Chr6D_492412548	18	492412548	7.47636e-14	13.1263	0.0110887	1984	2.59611e-10	3.82217
LR	Gapit	only_K	Chr6D_492412549	18	492412549	7.47636e-14	13.1263	0.0110887	1984	2.59611e-10	3.82217
LR	Gapit	only_K	Chr6D_492412555	18	492412555	7.47636e-14	13.1263	0.0110887	1984	2.59611e-10	3.82217
LR	Gapit	only_K	Chr6D_492412558	18	492412558	7.47636e-14	13.1263	0.0110887	1984	2.59611e-10	3.82217
LR	Gapit	only_K	Chr6D_492412583	18	492412583	4.88476e-14	13.3112	0.0115927	1984	2.20505e-10	3.72287
LR	Gapit	only_K	Chr6D_492412594	18	492412594	3.05551e-14	13.5149	0.0113407	1984	1.4519e-10	3.91211
LR	Gapit	only_K	Chr6D_492412606	18	492412606	6.8818e-14	13.1623	0.0115927	1984	2.59611e-10	3.77509
LR	Gapit	only_K	Chr6D_492527653	18	492527653	3.11171e-12	11.507	0.0133569	1984	8.51318e-09	3.05689
LR	Gapit	only_K	Chr6D_492527672	18	492527672	1.7245e-11	10.7633	0.0131048	1984	4.20791e-08	2.9298
LR	Gapit	only_K	Chr6D_492544185	18	492544185	7.59673e-06	5.11937	0.015625	1984	0.0100861	1.72047
LR	Gapit	only_K	Chr6D_493151702	18	493151702	4.35987e-12	11.3605	0.0126008	1984	1.15771e-08	3.21034
LR	Gapit	only_K	Chr6D_493934278	18	493934278	0.000316051	3.50024	0.0589718	1984	0.211239	0.656771
LR	Gapit	only_K	Chr6D_493934435	18	493934435	0.00020818	3.68156	0.0584677	1984	0.149988	0.682225
LR	Gapit	only_K	Chr6D_493934716	18	493934716	0.000100283	3.99877	0.0584677	1984	0.0854139	0.714833
LR	Gapit	only_K	Chr6D_493934717	18	493934717	0.000144742	3.8394	0.0582157	1984	0.119888	0.699069
LR	Gapit	only_K	Chr6D_494318823	18	494318823	1.47049e-11	10.8325	0.0120968	1984	3.68779e-08	3.11718
LR	Gapit	only_K	Chr6D_494318841	18	494318841	3.9173e-11	10.407	0.0123488	1984	9.307e-08	3.01037
LR	Gapit	only_K	Chr6D_494718668	18	494718668	1.42357e-10	9.84662	0.015625	1984	3.21311e-07	2.22492
LR	Gapit	only_K	Chr7A_30987944	19	30987944	0.000819551	3.08642	0.433468	1984	0.340093	-0.301069
LR	Gapit	only_K	Chr7A_30988267	19	30988267	0.00068076	3.16701	0.432712	1984	0.298891	-0.305569
LR	Gapit	only_K	Chr7A_30988331	19	30988331	0.00068076	3.16701	0.432712	1984	0.298891	-0.305569
LR	Gapit	only_K	Chr7A_30988363	19	30988363	0.000588758	3.23006	0.432964	1984	0.280065	-0.309343
LR	Gapit	only_K	Chr7A_30988565	19	30988565	0.000728307	3.13769	0.43372	1984	0.313113	-0.303939
LR	Gapit	only_K	Chr7A_30988585	19	30988585	0.000701234	3.15414	0.433468	1984	0.302916	-0.304874
LR	Gapit	only_K	Chr7A_30988755	19	30988755	0.000821118	3.08559	0.43372	1984	0.340093	-0.300586
LR	Gapit	only_K	Chr7A_31141346	19	31141346	0.000866171	3.0624	0.440272	1984	0.344496	-0.298799
LR	Gapit	only_K	Chr7A_31211032	19	31211032	0.000163928	3.78535	0.446573	1984	0.126495	-0.334921
LR	Gapit	only_K	Chr7A_572577493	19	572577493	0.000129096	3.88909	0.114919	1984	0.108927	0.512623
LR	Gapit	only_K	Chr7A_575303554	19	575303554	0.000401724	3.39607	0.109627	1984	0.238611	0.485674
LR	Gapit	only_K	Chr7A_576017774	19	576017774	0.000442227	3.35435	0.109879	1984	0.255687	0.482093
LR	Gapit	only_K	Chr7A_576116251	19	576116251	0.000501446	3.29978	0.110131	1984	0.255774	0.476289
LR	Gapit	only_K	Chr7A_695589350	19	695589350	0.000157337	3.80317	0.09375	1984	0.124187	-0.5645
LR	Gapit	only_K	Chr7B_602144904	20	602144904	1.47861e-09	8.83015	0.0115927	1984	3.17842e-06	2.9902
LR	Gapit	only_K	Chr7B_602144950	20	602144950	1.47861e-09	8.83015	0.0115927	1984	3.17842e-06	2.9902
LR	Gapit	only_K	Chr7D_385576	21	385576	0.000524546	3.28022	0.0201613	1984	0.264568	-0.969839
LR	Gapit	only_K	Chr7D_26126193	21	26126193	0.000587659	3.23087	0.0226815	1984	0.280065	-1.09295
LR	Gapit	only_K	Chr7D_100643947	21	100643947	0.000265479	3.57597	0.0110887	1984	0.181577	-1.27164
LR	Gapit	only_K	Chr7D_611401237	21	611401237	4.90363e-16	15.3095	0.0133569	1984	2.21357e-11	3.31673
LR	Gapit	only_K	Chr7D_611401245	21	611401245	2.4398e-17	16.6126	0.0131048	1984	2.20272e-12	3.50751
LR	Gapit	only_K	Chr7D_611401361	21	611401361	5.18738e-15	14.2851	0.0110887	1984	6.69046e-11	3.55717
LR	FARMCPU	pheno+geno	Chr1A_11338370	1A	11338370	0.000559468	3.25222	0.133065	0.999914	0.310088
LR	FARMCPU	pheno+geno	Chr1A_590272419	1A	590272419	0.000506849	3.29512	0.444556	0.999914	0.217815
LR	FARMCPU	pheno+geno	Chr1B_652618416	1B	652618416	3.77707e-05	4.42285	0.271169	0.290579	0.279011
LR	FARMCPU	pheno+geno	Chr1B_679791395	1B	679791395	7.78939e-05	4.1085	0.0559476	0.402348	-0.447152
LR	FARMCPU	pheno+geno	Chr1D_46349372	1D	46349372	0.000609267	3.21519	0.0766129	0.999914	-0.373391
LR	FARMCPU	pheno+geno	Chr2A_779778819	2A	779778819	7.48126e-05	4.12603	0.0559476	0.402348	-0.449062
LR	FARMCPU	pheno+geno	Chr2B_678920949	2B	678920949	0.000168597	3.77315	0.30872	0.592867	0.218511
LR	FARMCPU	pheno+geno	Chr2B_716875253	2B	716875253	0.000738301	3.13177	0.030998	0.999914	0.50809
LR	FARMCPU	pheno+geno	Chr2B_734585834	2B	734585834	0.000879352	3.05584	0.164062	0.999914	0.278846
LR	FARMCPU	pheno+geno	Chr2B_750196943	2B	750196943	3.75396e-05	4.42551	0.234627	0.290579	-0.295516
LR	FARMCPU	pheno+geno	Chr2D_392797084	2D	392797084	0.000117143	3.93128	0.0219254	0.503622	-0.959565
LR	FARMCPU	pheno+geno	Chr3A_370578	3A	370578	0.000170736	3.76768	0.215978	0.592867	-0.245063
LR	FARMCPU	pheno+geno	Chr3A_711802271	3A	711802271	0.000657572	3.18206	0.429688	0.999914	0.212581
LR	FARMCPU	pheno+geno	Chr3B_53685308	3B	53685308	1.74103e-07	6.75919	0.0279738	0.0031437	1.2129
LR	FARMCPU	pheno+geno	Chr3B_583721662	3B	583721662	0.00031615	3.50011	0.419103	0.96707	0.221131
LR	FARMCPU	pheno+geno	Chr3B_754025798	3B	754025798	0.000878782	3.05612	0.0428427	0.999914	0.488448
LR	FARMCPU	pheno+geno	Chr4A_681101889	4A	681101889	4.79922e-05	4.31883	0.030494	0.290579	-0.618603
LR	FARMCPU	pheno+geno	Chr4B_18740246	4B	18740246	0.0009109	3.04053	0.187752	0.999914	0.263713
LR	FARMCPU	pheno+geno	Chr4B_18740258	4B	18740258	0.0009109	3.04053	0.187752	0.999914	0.263713
LR	FARMCPU	pheno+geno	Chr4B_18740259	4B	18740259	0.0009109	3.04053	0.187752	0.999914	0.263713
LR	FARMCPU	pheno+geno	Chr4B_19209086	4B	19209086	0.000434758	3.36175	0.258821	0.999914	0.240238
LR	FARMCPU	pheno+geno	Chr4B_554311160	4B	554311160	4.8278e-05	4.31625	0.0176411	0.290579	-0.987914
LR	FARMCPU	pheno+geno	Chr4D_3385413	4D	3385413	8.5482e-05	4.06813	0.483619	0.406188	-0.215812
LR	FARMCPU	pheno+geno	Chr4D_12851259	4D	12851259	9.42211e-05	4.02585	0.047631	0.425328	-0.471912
LR	FARMCPU	pheno+geno	Chr4D_15502361	4D	15502361	1.05666e-15	14.9761	0.0133569	4.76993e-11	-1.88781
LR	FARMCPU	pheno+geno	Chr4D_63684003	4D	63684003	1.3811e-05	4.85977	0.0831653	0.178129	-0.527122
LR	FARMCPU	pheno+geno	Chr4D_396886837	4D	396886837	3.57664e-05	4.44652	0.0115927	0.290579	-0.81847
LR	FARMCPU	pheno+geno	Chr5A_140784399	5A	140784399	1.10985e-07	6.95473	0.0640121	0.00250502	-0.64638
LR	FARMCPU	pheno+geno	Chr5A_447688328	5A	447688328	0.000474347	3.3239	0.0488911	0.999914	-0.438883
LR	FARMCPU	pheno+geno	Chr5A_459494322	5A	459494322	0.000124764	3.90391	0.0685484	0.512004	-0.419616
LR	FARMCPU	pheno+geno	Chr5A_623726683	5A	623726683	3.46972e-05	4.45971	0.0136089	0.290579	-1.08353
LR	FARMCPU	pheno+geno	Chr5B_39014989	5B	39014989	0.00035275	3.45253	0.0897177	0.995229	-0.371653
LR	FARMCPU	pheno+geno	Chr5D_43156773	5D	43156773	8.02173e-05	4.09573	0.0274698	0.402348	-0.784826
LR	FARMCPU	pheno+geno	Chr5D_339055323	5D	339055323	0.000418467	3.37834	0.0141129	0.999914	0.946283
LR	FARMCPU	pheno+geno	Chr6A_619646881	6A	619646881	4.6904e-05	4.32879	0.0191532	0.290579	-0.814655
LR	FARMCPU	pheno+geno	Chr6D_486896673	6D	486896673	0.000501865	3.29941	0.092994	0.999914	-0.361615
LR	FARMCPU	pheno+geno	Chr6D_493934716	6D	493934716	1.10313e-07	6.95737	0.0584677	0.00250502	0.704005
LR	FARMCPU	pheno+geno	Chr7A_11375156	7A	11375156	0.000131895	3.87977	0.385585	0.517736	0.218047
LR	FARMCPU	pheno+geno	Chr7A_99721049	7A	99721049	0.000806535	3.09338	0.031754	0.999914	-0.544081
LR	FARMCPU	pheno+geno	Chr7A_99770886	7A	99770886	0.000743186	3.1289	0.0196573	0.999914	-0.761703
LR	FARMCPU	pheno+geno	Chr7A_237191048	7A	237191048	0.000614179	3.21171	0.259577	0.999914	-0.241179
LR	FARMCPU	pheno+geno	Chr7A_239120728	7A	239120728	0.000422609	3.37406	0.318044	0.999914	-0.231359
LR	FARMCPU	pheno+geno	Chr7A_239422368	7A	239422368	0.000347579	3.45895	0.318296	0.995229	-0.234971
LR	FARMCPU	pheno+geno	Chr7A_239450575	7A	239450575	0.000403816	3.39382	0.317288	0.999914	-0.232555
LR	FARMCPU	pheno+geno	Chr7A_240053104	7A	240053104	0.000306736	3.51324	0.317792	0.96707	-0.237274
LR	FARMCPU	pheno+geno	Chr7A_240746293	7A	240746293	0.000321346	3.49303	0.318044	0.96707	-0.236557
LR	FARMCPU	pheno+geno	Chr7A_241208017	7A	241208017	0.000317913	3.49769	0.32006	0.96707	-0.236734
LR	FARMCPU	pheno+geno	Chr7A_242534758	7A	242534758	0.000785748	3.10472	0.328629	0.999914	-0.217676
LR	FARMCPU	pheno+geno	Chr7A_243101182	7A	243101182	0.000595558	3.22508	0.329385	0.999914	-0.222362
LR	FARMCPU	pheno+geno	Chr7A_572577493	7A	572577493	5.98437e-06	5.22298	0.114919	0.0900478	0.355047
LR	FARMCPU	pheno+geno	Chr7A_657525778	7A	657525778	0.000811501	3.09071	0.0131048	0.999914	0.845926
LR	FARMCPU	pheno+geno	Chr7A_695572213	7A	695572213	0.000143851	3.84209	0.016129	0.541136	1.09441
LR	FARMCPU	pheno+geno	Chr7B_541189121	7B	541189121	4.11469e-05	4.38566	0.0236895	0.290579	0.66571
LR	FARMCPU	pheno+geno	Chr7D_611401245	7D	611401245	8.30616e-26	25.0806	0.0131048	7.49905e-21	3.23623
LR	Tassel	only_K	Chr1A_8092186	1A	8092186	0.00031389	3.50322				0.00817
LR	Tassel	only_K	Chr1A_11338370	1A	11338370	0.00030148	3.52074				0.00821
LR	Tassel	only_K	Chr1A_11338418	1A	11338418	0.00048363	3.31549				0.00773
LR	Tassel	only_K	Chr1A_11339042	1A	11339042	0.00022328	3.65115				0.00851
LR	Tassel	only_K	Chr1A_11341756	1A	11341756	0.00032184	3.49236				0.00814
LR	Tassel	only_K	Chr1A_247323697	1A	247323697	0.00026578	3.57548				0.00834
LR	Tassel	only_K	Chr1B_28470645	1B	28470645	0.00027019	3.56833				0.00671
LR	Tassel	only_K	Chr1B_28683922	1B	28683922	0.00015183	3.81864				0.00726
LR	Tassel	only_K	Chr1B_29104859	1B	29104859	0.00034712	3.45952				0.00648
LR	Tassel	only_K	Chr1B_30222918	1B	30222918	0.00034712	3.45952				0.00648
LR	Tassel	only_K	Chr1B_30444246	1B	30444246	4.6002e-11	10.3372				0.0243
LR	Tassel	only_K	Chr1B_30676623	1B	30676623	0.00038754	3.41168				0.00637
LR	Tassel	only_K	Chr1B_34688529	1B	34688529	0.0007565	3.12119				0.00574
LR	Tassel	only_K	Chr1B_36369129	1B	36369129	5.1491e-05	4.28827				0.0083
LR	Tassel	only_K	Chr1B_36401065	1B	36401065	0.00087535	3.05782				0.0056
LR	Tassel	only_K	Chr1B_36401074	1B	36401074	0.00087535	3.05782				0.0056
LR	Tassel	only_K	Chr1B_36403844	1B	36403844	0.00087535	3.05782				0.0056
LR	Tassel	only_K	Chr1B_36403868	1B	36403868	0.00087535	3.05782				0.0056
LR	Tassel	only_K	Chr1B_36403894	1B	36403894	0.00087535	3.05782				0.0056
LR	Tassel	only_K	Chr1B_41770533	1B	41770533	0.00052511	3.27975				0.00608
LR	Tassel	only_K	Chr1B_523356696	1B	523356696	0.00015143	3.81979				0.00891
LR	Tassel	only_K	Chr1D_24316156	1D	24316156	0.00093931	3.02719				0.00705
LR	Tassel	only_K	Chr2A_1845266	2A	1845266	0.00038331	3.41645				0.00638
LR	Tassel	only_K	Chr2A_14760248	2A	14760248	0.00012887	3.88985				0.00907
LR	Tassel	only_K	Chr2A_769977342	2A	769977342	0.00019333	3.7137				0.00866
LR	Tassel	only_K	Chr2A_771766019	2A	771766019	0.00088617	3.05248				0.00711
LR	Tassel	only_K	Chr2A_771766033	2A	771766033	0.0003828	3.41703				0.00797
LR	Tassel	only_K	Chr2A_771766054	2A	771766054	0.00088617	3.05248				0.00711
LR	Tassel	only_K	Chr2A_779778720	2A	779778720	0.0002573	3.58956				0.00837
LR	Tassel	only_K	Chr2B_79676258	2B	79676258	0.00099194	3.00351				0.007
LR	Tassel	only_K	Chr2B_252718010	2B	252718010	0.00081935	3.08653				0.00719
LR	Tassel	only_K	Chr2B_512042411	2B	512042411	0.00030181	3.52027				0.00821
LR	Tassel	only_K	Chr2B_678836506	2B	678836506	0.00027394	3.56234				0.00831
LR	Tassel	only_K	Chr2B_735120560	2B	735120560	0.00064235	3.19223				0.00744
LR	Tassel	only_K	Chr2B_782615362	2B	782615362	0.00063112	3.19989				0.00746
LR	Tassel	only_K	Chr2D_510514	2D	510514	0.00085949	3.06576				0.00714
LR	Tassel	only_K	Chr2D_23822477	2D	23822477	0.00077965	3.1081				0.00724
LR	Tassel	only_K	Chr2D_615542055	2D	615542055	0.00025785	3.58863				0.00837
LR	Tassel	only_K	Chr3A_17226911	3A	17226911	0.00049839	3.30243				0.0077
LR	Tassel	only_K	Chr3A_41735535	3A	41735535	0.00020495	3.68835				0.0086
LR	Tassel	only_K	Chr3A_98894570	3A	98894570	0.00012699	3.89623				0.00909
LR	Tassel	only_K	Chr3A_99653494	3A	99653494	7.8134e-05	4.10716				0.00958
LR	Tassel	only_K	Chr3A_99933573	3A	99933573	0.0002484	3.60485				0.00841
LR	Tassel	only_K	Chr3A_99933574	3A	99933574	0.0002484	3.60485				0.00841
LR	Tassel	only_K	Chr3A_100804775	3A	100804775	0.00012699	3.89623				0.00909
LR	Tassel	only_K	Chr3A_101236808	3A	101236808	0.0002484	3.60485				0.00841
LR	Tassel	only_K	Chr3A_101238091	3A	101238091	0.0002484	3.60485				0.00841
LR	Tassel	only_K	Chr3A_101663884	3A	101663884	0.00052551	3.27942				0.00764
LR	Tassel	only_K	Chr3A_101663919	3A	101663919	0.00052551	3.27942				0.00764
LR	Tassel	only_K	Chr3A_102368658	3A	102368658	0.00024614	3.60882				0.00842
LR	Tassel	only_K	Chr3A_102368681	3A	102368681	0.00024614	3.60882				0.00842
LR	Tassel	only_K	Chr3A_102368698	3A	102368698	0.00024614	3.60882				0.00842
LR	Tassel	only_K	Chr3A_102453838	3A	102453838	0.00073241	3.13525				0.00731
LR	Tassel	only_K	Chr3A_102453851	3A	102453851	0.00024614	3.60882				0.00842
LR	Tassel	only_K	Chr3A_298133197	3A	298133197	0.00051944	3.28446				0.00766
LR	Tassel	only_K	Chr3A_528428898	3A	528428898	8.3134e-05	4.08022				0.00952
LR	Tassel	only_K	Chr3A_533370410	3A	533370410	7.9355e-05	4.10043				0.00957
LR	Tassel	only_K	Chr3A_577507436	3A	577507436	0.00039798	3.40014				0.00793
LR	Tassel	only_K	Chr3A_652159693	3A	652159693	0.0001362	3.86582				0.00902
LR	Tassel	only_K	Chr3B_1603898	3B	1603898	0.00023687	3.62549				0.00845
LR	Tassel	only_K	Chr3B_23933004	3B	23933004	0.00016522	3.78194				0.00882
LR	Tassel	only_K	Chr3B_53685308	3B	53685308	9.0692e-05	4.04243				0.00943
LR	Tassel	only_K	Chr3B_154945861	3B	154945861	0.0002404	3.61907				0.00844
LR	Tassel	only_K	Chr3B_194418770	3B	194418770	0.00074082	3.13029				0.0073
LR	Tassel	only_K	Chr3B_462389327	3B	462389327	1.3474e-05	4.8705				0.01137
LR	Tassel	only_K	Chr3B_462389591	3B	462389591	2.9451e-05	4.5309				0.01058
LR	Tassel	only_K	Chr3B_462389618	3B	462389618	0.00026238	3.58107				0.00835
LR	Tassel	only_K	Chr3B_583721662	3B	583721662	0.00018523	3.73229				0.00871
LR	Tassel	only_K	Chr3B_754025798	3B	754025798	0.00093197	3.0306				0.00554
LR	Tassel	only_K	Chr3B_802170987	3B	802170987	0.00068589	3.16375				0.00737
LR	Tassel	only_K	Chr3B_802171030	3B	802171030	0.00063471	3.19742				0.00745
LR	Tassel	only_K	Chr3D_6402365	3D	6402365	0.00020336	3.69173				0.00861
LR	Tassel	only_K	Chr3D_41290512	3D	41290512	0.00060932	3.21515				0.00749
LR	Tassel	only_K	Chr3D_361923066	3D	361923066	4.6605e-05	4.33157				0.01011
LR	Tassel	only_K	Chr3D_361923074	3D	361923074	0.00076875	3.11421				0.00726
LR	Tassel	only_K	Chr3D_361923112	3D	361923112	5.3235e-05	4.2738				0.00997
LR	Tassel	only_K	Chr3D_473703361	3D	473703361	0.00071171	3.1477				0.00734
LR	Tassel	only_K	Chr3D_582688681	3D	582688681	0.00069884	3.15562				0.00581
LR	Tassel	only_K	Chr4A_697674318	4A	697674318	0.000142	3.84771				0.00898
LR	Tassel	only_K	Chr4A_747910226	4A	747910226	0.0008786	3.05621				0.00712
LR	Tassel	only_K	Chr4B_120824364	4B	120824364	0.00037594	3.42488				0.00799
LR	Tassel	only_K	Chr4B_554311160	4B	554311160	6.4952e-05	4.18741				0.00808
LR	Tassel	only_K	Chr4B_600723259	4B	600723259	0.00081015	3.09143				0.0072
LR	Tassel	only_K	Chr4D_15502361	4D	15502361	3.7037e-06	5.43136				0.01269
LR	Tassel	only_K	Chr4D_147800578	4D	147800578	0.00066898	3.17459				0.00585
LR	Tassel	only_K	Chr4D_167634708	4D	167634708	0.00066898	3.17459				0.00585
LR	Tassel	only_K	Chr4D_177039138	4D	177039138	0.00066898	3.17459				0.00585
LR	Tassel	only_K	Chr4D_223181650	4D	223181650	0.00066898	3.17459				0.00585
LR	Tassel	only_K	Chr4D_396886837	4D	396886837	0.00023205	3.63442				0.00848
LR	Tassel	only_K	Chr4D_455390559	4D	455390559	0.00084564	3.07281				0.00716
LR	Tassel	only_K	Chr4D_489857134	4D	489857134	0.00017974	3.74536				0.00874
LR	Tassel	only_K	Chr4D_489857146	4D	489857146	0.00017974	3.74536				0.00874
LR	Tassel	only_K	Chr4D_499530902	4D	499530902	0.00097898	3.00923				0.00701
LR	Tassel	only_K	Chr4D_499530945	4D	499530945	0.00097898	3.00923				0.00701
LR	Tassel	only_K	Chr4D_513934856	4D	513934856	0.00034803	3.45838				0.00806
LR	Tassel	only_K	Chr4D_513934862	4D	513934862	0.00059845	3.22297				0.00751
LR	Tassel	only_K	Chr4D_513934870	4D	513934870	0.00059845	3.22297				0.00751
LR	Tassel	only_K	Chr4D_513934882	4D	513934882	0.00086087	3.06506				0.00714
LR	Tassel	only_K	Chr4D_513934883	4D	513934883	0.00059845	3.22297				0.00751
LR	Tassel	only_K	Chr4D_513934892	4D	513934892	0.00059845	3.22297				0.00751
LR	Tassel	only_K	Chr4D_513934902	4D	513934902	0.00086087	3.06506				0.00714
LR	Tassel	only_K	Chr4D_513934904	4D	513934904	0.00059845	3.22297				0.00751
LR	Tassel	only_K	Chr5A_16880865	5A	16880865	0.00047568	3.32269				0.00775
LR	Tassel	only_K	Chr5A_17054321	5A	17054321	0.00047342	3.32475				0.00775
LR	Tassel	only_K	Chr5A_20571613	5A	20571613	3.6062e-07	6.44295				0.01507
LR	Tassel	only_K	Chr5A_74088681	5A	74088681	0.00070058	3.15454				0.00581
LR	Tassel	only_K	Chr5A_297331283	5A	297331283	0.00071001	3.14874				0.00734
LR	Tassel	only_K	Chr5A_445453314	5A	445453314	0.00028017	3.55258				0.00828
LR	Tassel	only_K	Chr5A_459200661	5A	459200661	0.00086682	3.06207				0.00561
LR	Tassel	only_K	Chr5A_459494322	5A	459494322	0.00028381	3.54697				0.00667
LR	Tassel	only_K	Chr5A_469533486	5A	469533486	0.00045167	3.34518				0.0078
LR	Tassel	only_K	Chr5A_469583916	5A	469583916	0.00018236	3.73907				0.00872
LR	Tassel	only_K	Chr5A_469881186	5A	469881186	0.00093913	3.02727				0.00705
LR	Tassel	only_K	Chr5A_469881220	5A	469881220	0.00074467	3.12804				0.00729
LR	Tassel	only_K	Chr5A_481268235	5A	481268235	1.8031e-05	4.74398				0.01108
LR	Tassel	only_K	Chr5A_490224362	5A	490224362	6.7431e-06	5.17114				0.01208
LR	Tassel	only_K	Chr5A_503191596	5A	503191596	0.00024799	3.60557				0.00841
LR	Tassel	only_K	Chr5A_503191627	5A	503191627	0.00024799	3.60557				0.00841
LR	Tassel	only_K	Chr5A_619708723	5A	619708723	0.0002479	3.60572				0.0068
LR	Tassel	only_K	Chr5A_621816621	5A	621816621	0.00012915	3.88891				0.00742
LR	Tassel	only_K	Chr5A_621817306	5A	621817306	7.4383e-05	4.12853				0.00795
LR	Tassel	only_K	Chr5A_621822443	5A	621822443	7.4383e-05	4.12853				0.00795
LR	Tassel	only_K	Chr5A_622343655	5A	622343655	7.4383e-05	4.12853				0.00795
LR	Tassel	only_K	Chr5A_622412216	5A	622412216	2.1274e-05	4.67215				0.00916
LR	Tassel	only_K	Chr5A_622412244	5A	622412244	0.00012915	3.88891				0.00742
LR	Tassel	only_K	Chr5A_622602643	5A	622602643	7.4383e-05	4.12853				0.00795
LR	Tassel	only_K	Chr5A_622602706	5A	622602706	7.4383e-05	4.12853				0.00795
LR	Tassel	only_K	Chr5A_622602725	5A	622602725	7.4383e-05	4.12853				0.00795
LR	Tassel	only_K	Chr5A_622609534	5A	622609534	7.4383e-05	4.12853				0.00795
LR	Tassel	only_K	Chr5A_622609567	5A	622609567	7.4383e-05	4.12853				0.00795
LR	Tassel	only_K	Chr5A_622717375	5A	622717375	7.4383e-05	4.12853				0.00795
LR	Tassel	only_K	Chr5A_622855549	5A	622855549	7.4383e-05	4.12853				0.00795
LR	Tassel	only_K	Chr5A_623081428	5A	623081428	7.4383e-05	4.12853				0.00795
LR	Tassel	only_K	Chr5A_623385256	5A	623385256	7.4383e-05	4.12853				0.00795
LR	Tassel	only_K	Chr5A_623386076	5A	623386076	7.4383e-05	4.12853				0.00795
LR	Tassel	only_K	Chr5A_623389296	5A	623389296	7.4383e-05	4.12853				0.00795
LR	Tassel	only_K	Chr5A_623716591	5A	623716591	0.00012915	3.88891				0.00742
LR	Tassel	only_K	Chr5A_623726683	5A	623726683	0.00020852	3.68085				0.00858
LR	Tassel	only_K	Chr5A_623730615	5A	623730615	0.00012915	3.88891				0.00742
LR	Tassel	only_K	Chr5A_623905238	5A	623905238	0.00012915	3.88891				0.00742
LR	Tassel	only_K	Chr5A_623905270	5A	623905270	0.0002074	3.68319				0.00697
LR	Tassel	only_K	Chr5A_623905344	5A	623905344	0.0002074	3.68319				0.00697
LR	Tassel	only_K	Chr5A_624027213	5A	624027213	0.00012915	3.88891				0.00742
LR	Tassel	only_K	Chr5A_624027289	5A	624027289	0.00012915	3.88891				0.00742
LR	Tassel	only_K	Chr5A_624045874	5A	624045874	0.00048039	3.31841				0.00617
LR	Tassel	only_K	Chr5A_624045923	5A	624045923	0.0002074	3.68319				0.00697
LR	Tassel	only_K	Chr5A_624081594	5A	624081594	0.0002542	3.59482				0.00838
LR	Tassel	only_K	Chr5A_624394515	5A	624394515	0.00011433	3.94184				0.00754
LR	Tassel	only_K	Chr5A_655038415	5A	655038415	0.00051078	3.29177				0.00767
LR	Tassel	only_K	Chr5A_655051479	5A	655051479	0.00035491	3.44988				0.00804
LR	Tassel	only_K	Chr5A_655052749	5A	655052749	0.00051078	3.29177				0.00767
LR	Tassel	only_K	Chr5A_655055231	5A	655055231	0.00051078	3.29177				0.00767
LR	Tassel	only_K	Chr5A_655070356	5A	655070356	0.00035491	3.44988				0.00804
LR	Tassel	only_K	Chr5B_291394615	5B	291394615	0.00070756	3.15024				0.00734
LR	Tassel	only_K	Chr5B_291394644	5B	291394644	0.00087503	3.05798				0.00713
LR	Tassel	only_K	Chr5B_291394647	5B	291394647	0.00070756	3.15024				0.00734
LR	Tassel	only_K	Chr5B_433164266	5B	433164266	0.00015645	3.80562				0.00888
LR	Tassel	only_K	Chr5B_551522055	5B	551522055	0.00013515	3.86918				0.00903
LR	Tassel	only_K	Chr5B_551522092	5B	551522092	0.00013515	3.86918				0.00903
LR	Tassel	only_K	Chr5B_552975827	5B	552975827	0.00036689	3.43546				0.00642
LR	Tassel	only_K	Chr5B_554958965	5B	554958965	0.00062871	3.20155				0.00746
LR	Tassel	only_K	Chr5B_558083273	5B	558083273	0.00076248	3.11777				0.00727
LR	Tassel	only_K	Chr5B_558086578	5B	558086578	0.00085422	3.06843				0.00715
LR	Tassel	only_K	Chr5B_558086594	5B	558086594	0.00085422	3.06843				0.00715
LR	Tassel	only_K	Chr5B_571402776	5B	571402776	0.0009658	3.01511				0.00703
LR	Tassel	only_K	Chr5B_626334545	5B	626334545	0.00030358	3.51773				0.0082
LR	Tassel	only_K	Chr5B_632398235	5B	632398235	0.0003547	3.45014				0.00804
LR	Tassel	only_K	Chr5B_652657461	5B	652657461	0.00055584	3.25505				0.00759
LR	Tassel	only_K	Chr5D_438060351	5D	438060351	0.00037929	3.42103				0.00798
LR	Tassel	only_K	Chr5D_438060362	5D	438060362	0.00037929	3.42103				0.00798
LR	Tassel	only_K	Chr5D_438060381	5D	438060381	0.00037929	3.42103				0.00798
LR	Tassel	only_K	Chr5D_438060442	5D	438060442	0.00037929	3.42103				0.00798
LR	Tassel	only_K	Chr5D_438060449	5D	438060449	0.00037929	3.42103				0.00798
LR	Tassel	only_K	Chr5D_438060451	5D	438060451	0.00037929	3.42103				0.00798
LR	Tassel	only_K	Chr5D_438061607	5D	438061607	8.3258e-05	4.07957				0.00952
LR	Tassel	only_K	Chr5D_479556466	5D	479556466	0.00043188	3.36464				0.00784
LR	Tassel	only_K	Chr5D_486790987	5D	486790987	0.0001849	3.73306				0.00871
LR	Tassel	only_K	Chr5D_486791040	5D	486791040	0.00017627	3.75382				0.00876
LR	Tassel	only_K	Chr5D_551643401	5D	551643401	0.00090674	3.04252				0.00709
LR	Tassel	only_K	Chr5D_551643403	5D	551643403	0.00092977	3.03162				0.00707
LR	Tassel	only_K	Chr5D_568629336	5D	568629336	0.00029982	3.52314				0.00822
LR	Tassel	only_K	Chr6A_79617888	6A	79617888	0.00067244	3.17235				0.00739
LR	Tassel	only_K	Chr6A_79731748	6A	79731748	0.00052989	3.27581				0.00764
LR	Tassel	only_K	Chr6A_79731797	6A	79731797	0.00052989	3.27581				0.00764
LR	Tassel	only_K	Chr6A_79895228	6A	79895228	0.00048238	3.31661				0.00773
LR	Tassel	only_K	Chr6A_80054009	6A	80054009	0.00099877	3.00053				0.00699
LR	Tassel	only_K	Chr6A_618000932	6A	618000932	4.6377e-05	4.3337				0.01011
LR	Tassel	only_K	Chr6A_618000978	6A	618000978	0.00049637	3.30419				0.0077
LR	Tassel	only_K	Chr6A_621875764	6A	621875764	2.3634e-12	11.6265				0.02737
LR	Tassel	only_K	Chr6A_621875765	6A	621875765	2.3634e-12	11.6265				0.02737
LR	Tassel	only_K	Chr6A_621875768	6A	621875768	2.3634e-12	11.6265				0.02737
LR	Tassel	only_K	Chr6A_621875835	6A	621875835	2.3634e-12	11.6265				0.02737
LR	Tassel	only_K	Chr6B_7168927	6B	7168927	0.00010826	3.96553				0.00925
LR	Tassel	only_K	Chr6B_21346250	6B	21346250	0.00044694	3.34975				0.00781
LR	Tassel	only_K	Chr6B_29973795	6B	29973795	2.6037e-11	10.5844				0.02488
LR	Tassel	only_K	Chr6B_29973800	6B	29973800	2.6037e-11	10.5844				0.02488
LR	Tassel	only_K	Chr6B_29973882	6B	29973882	2.6037e-11	10.5844				0.02488
LR	Tassel	only_K	Chr6B_29973886	6B	29973886	8.9883e-11	10.0463				0.0236
LR	Tassel	only_K	Chr6B_40596232	6B	40596232	0.00039908	3.39894				0.00792
LR	Tassel	only_K	Chr6B_41796845	6B	41796845	3.7971e-05	4.42055				0.01032
LR	Tassel	only_K	Chr6B_57393666	6B	57393666	0.00034433	3.46303				0.00807
LR	Tassel	only_K	Chr6B_490980240	6B	490980240	1.6524e-07	6.78188				0.01587
LR	Tassel	only_K	Chr6B_490980286	6B	490980286	9.332e-12	11.03				0.02595
LR	Tassel	only_K	Chr6B_490980290	6B	490980290	4.0636e-12	11.3911				0.02681
LR	Tassel	only_K	Chr6B_490980317	6B	490980317	9.332e-12	11.03				0.02595
LR	Tassel	only_K	Chr6B_490981352	6B	490981352	1.9807e-08	7.70318				0.01805
LR	Tassel	only_K	Chr6B_620652531	6B	620652531	0.00091857	3.03689				0.00708
LR	Tassel	only_K	Chr6B_690276721	6B	690276721	0.00081562	3.08851				0.0072
LR	Tassel	only_K	Chr6B_721639559	6B	721639559	2.4606e-07	6.60896				0.01352
LR	Tassel	only_K	Chr6B_721661195	6B	721661195	0.00010387	3.98351				0.00929
LR	Tassel	only_K	Chr6B_721739561	6B	721739561	4.5523e-08	7.34177				0.0172
LR	Tassel	only_K	Chr6B_721739585	6B	721739585	6.6651e-07	6.17619				0.01445
LR	Tassel	only_K	Chr6B_722531242	6B	722531242	5.7724e-06	5.23864				0.01224
LR	Tassel	only_K	Chr6B_722883731	6B	722883731	2.6731e-06	5.57298				0.01303
LR	Tassel	only_K	Chr6B_724039929	6B	724039929	9.5474e-07	6.02011				0.01408
LR	Tassel	only_K	Chr6B_724341331	6B	724341331	1.1166e-05	4.9521				0.01157
LR	Tassel	only_K	Chr6B_724341355	6B	724341355	2.2459e-05	4.64861				0.01085
LR	Tassel	only_K	Chr6B_724341358	6B	724341358	2.2459e-05	4.64861				0.01085
LR	Tassel	only_K	Chr6B_724341360	6B	724341360	2.2459e-05	4.64861				0.01085
LR	Tassel	only_K	Chr6B_724341378	6B	724341378	2.2459e-05	4.64861				0.01085
LR	Tassel	only_K	Chr6B_724341380	6B	724341380	2.2459e-05	4.64861				0.01085
LR	Tassel	only_K	Chr6B_724341399	6B	724341399	2.2459e-05	4.64861				0.01085
LR	Tassel	only_K	Chr6B_724341407	6B	724341407	2.2459e-05	4.64861				0.01085
LR	Tassel	only_K	Chr6B_724417696	6B	724417696	5.7589e-06	5.23966				0.01224
LR	Tassel	only_K	Chr6B_724417703	6B	724417703	5.7589e-06	5.23966				0.01224
LR	Tassel	only_K	Chr6B_724417707	6B	724417707	5.7589e-06	5.23966				0.01224
LR	Tassel	only_K	Chr6B_724463511	6B	724463511	7.4667e-05	4.12687				0.00963
LR	Tassel	only_K	Chr6B_724463583	6B	724463583	6.1227e-05	4.21306				0.00983
LR	Tassel	only_K	Chr6B_724685109	6B	724685109	1.7772e-07	6.75026				0.0158
LR	Tassel	only_K	Chr6B_725013581	6B	725013581	6.7712e-13	12.1693				0.02866
LR	Tassel	only_K	Chr6B_725013662	6B	725013662	3.3751e-15	14.4717				0.03418
LR	Tassel	only_K	Chr6B_725013676	6B	725013676	3.3751e-15	14.4717				0.03418
LR	Tassel	only_K	Chr6B_725081102	6B	725081102	3.2757e-15	14.4847				0.03421
LR	Tassel	only_K	Chr6B_725081146	6B	725081146	3.8163e-15	14.4184				0.03405
LR	Tassel	only_K	Chr6B_726384224	6B	726384224	6.8162e-15	14.1665				0.03106
LR	Tassel	only_K	Chr6B_726384251	6B	726384251	6.8162e-15	14.1665				0.03106
LR	Tassel	only_K	Chr6B_726409771	6B	726409771	4.4874e-11	10.348				0.02213
LR	Tassel	only_K	Chr6B_726690566	6B	726690566	2.0965e-14	13.6785				0.02992
LR	Tassel	only_K	Chr6B_726980132	6B	726980132	2.0965e-14	13.6785				0.02992
LR	Tassel	only_K	Chr6B_728450946	6B	728450946	1.0633e-12	11.9733				0.02592
LR	Tassel	only_K	Chr6B_728487450	6B	728487450	1.4931e-08	7.82591				0.01834
LR	Tassel	only_K	Chr6B_729131465	6B	729131465	2.0965e-14	13.6785				0.02992
LR	Tassel	only_K	Chr6B_729131802	6B	729131802	1.2449e-10	9.90487				0.02327
LR	Tassel	only_K	Chr6B_729275959	6B	729275959	2.0965e-14	13.6785				0.02992
LR	Tassel	only_K	Chr6B_729276024	6B	729276024	2.0965e-14	13.6785				0.02992
LR	Tassel	only_K	Chr6B_729860657	6B	729860657	3.3963e-09	8.46899				0.01986
LR	Tassel	only_K	Chr6B_729860728	6B	729860728	1.4633e-10	9.83467				0.0231
LR	Tassel	only_K	Chr6B_729878468	6B	729878468	2.0965e-14	13.6785				0.02992
LR	Tassel	only_K	Chr6B_730222437	6B	730222437	2.0965e-14	13.6785				0.02992
LR	Tassel	only_K	Chr6B_730222445	6B	730222445	2.0965e-14	13.6785				0.02992
LR	Tassel	only_K	Chr6B_730329182	6B	730329182	8.7688e-10	9.05706				0.02126
LR	Tassel	only_K	Chr6D_23558327	6D	23558327	0.00012744	3.89469				0.00909
LR	Tassel	only_K	Chr6D_30874629	6D	30874629	8.0344e-05	4.09505				0.00956
LR	Tassel	only_K	Chr6D_35591766	6D	35591766	0.00089534	3.04801				0.0071
LR	Tassel	only_K	Chr6D_313175818	6D	313175818	0.00010168	3.99276				0.00932
LR	Tassel	only_K	Chr6D_490802837	6D	490802837	2.4351e-09	8.61348				0.0202
LR	Tassel	only_K	Chr6D_490802918	6D	490802918	2.7315e-10	9.5636				0.02246
LR	Tassel	only_K	Chr6D_490802937	6D	490802937	2.7315e-10	9.5636				0.02246
LR	Tassel	only_K	Chr6D_490802969	6D	490802969	2.7315e-10	9.5636				0.02246
LR	Tassel	only_K	Chr6D_490802971	6D	490802971	2.7315e-10	9.5636				0.02246
LR	Tassel	only_K	Chr6D_490802973	6D	490802973	2.7315e-10	9.5636				0.02246
LR	Tassel	only_K	Chr6D_491026383	6D	491026383	1.6665e-11	10.7782				0.02535
LR	Tassel	only_K	Chr6D_491541978	6D	491541978	1.4722e-12	11.832				0.02786
LR	Tassel	only_K	Chr6D_492412529	6D	492412529	9.2003e-14	13.0362				0.02841
LR	Tassel	only_K	Chr6D_492412544	6D	492412544	3.904e-14	13.4085				0.02928
LR	Tassel	only_K	Chr6D_492412548	6D	492412548	9.2003e-14	13.0362				0.02841
LR	Tassel	only_K	Chr6D_492412549	6D	492412549	9.2003e-14	13.0362				0.02841
LR	Tassel	only_K	Chr6D_492412555	6D	492412555	9.2003e-14	13.0362				0.02841
LR	Tassel	only_K	Chr6D_492412558	6D	492412558	9.2003e-14	13.0362				0.02841
LR	Tassel	only_K	Chr6D_492412583	6D	492412583	3.5675e-13	12.4476				0.02933
LR	Tassel	only_K	Chr6D_492412594	6D	492412594	3.904e-14	13.4085				0.02928
LR	Tassel	only_K	Chr6D_492412598	6D	492412598	0.00042697	3.3696				0.00786
LR	Tassel	only_K	Chr6D_492412606	6D	492412606	9.7682e-14	13.0102				0.02834
LR	Tassel	only_K	Chr6D_492527632	6D	492527632	0.00059595	3.22479				0.00752
LR	Tassel	only_K	Chr6D_492527653	6D	492527653	1.5794e-13	12.8015				0.03018
LR	Tassel	only_K	Chr6D_492527672	6D	492527672	1.4063e-12	11.8519				0.02791
LR	Tassel	only_K	Chr6D_492544185	6D	492544185	4.1605e-05	4.38085				0.01023
LR	Tassel	only_K	Chr6D_493151702	6D	493151702	2.4017e-13	12.6195				0.02974
LR	Tassel	only_K	Chr6D_493934278	6D	493934278	0.00065193	3.1858				0.00743
LR	Tassel	only_K	Chr6D_493934435	6D	493934435	0.00041144	3.38569				0.00789
LR	Tassel	only_K	Chr6D_493934716	6D	493934716	0.00015285	3.81573				0.0089
LR	Tassel	only_K	Chr6D_493934717	6D	493934717	0.00021328	3.67105				0.00856
LR	Tassel	only_K	Chr6D_494318823	6D	494318823	8.0628e-13	12.0935				0.02848
LR	Tassel	only_K	Chr6D_494318841	6D	494318841	2.9189e-12	11.5348				0.02715
LR	Tassel	only_K	Chr6D_494718668	6D	494718668	1.4237e-12	11.8466				0.02789
LR	Tassel	only_K	Chr7A_17258043	7A	17258043	0.00050957	3.2928				0.00768
LR	Tassel	only_K	Chr7A_17258060	7A	17258060	0.00014695	3.83283				0.00894
LR	Tassel	only_K	Chr7A_17258078	7A	17258078	0.0007166	3.14472				0.00733
LR	Tassel	only_K	Chr7A_31211032	7A	31211032	0.00047335	3.32482				0.00775
LR	Tassel	only_K	Chr7A_56900336	7A	56900336	0.00020772	3.68252				0.00859
LR	Tassel	only_K	Chr7A_130200370	7A	130200370	0.00082673	3.08264				0.00718
LR	Tassel	only_K	Chr7A_130384216	7A	130384216	0.00025554	3.59254				0.00838
LR	Tassel	only_K	Chr7A_130390665	7A	130390665	0.00025289	3.59707				0.00839
LR	Tassel	only_K	Chr7A_130477944	7A	130477944	0.00060664	3.21707				0.0075
LR	Tassel	only_K	Chr7A_657525778	7A	657525778	0.00090497	3.04337				0.00557
LR	Tassel	only_K	Chr7A_675833628	7A	675833628	0.0007512	3.12424				0.00728
LR	Tassel	only_K	Chr7A_675833651	7A	675833651	0.0007512	3.12424				0.00728
LR	Tassel	only_K	Chr7A_695589350	7A	695589350	0.00054613	3.2627				0.00761
LR	Tassel	only_K	Chr7B_51953267	7B	51953267	0.00051329	3.28964				0.00767
LR	Tassel	only_K	Chr7B_61473263	7B	61473263	0.00025112	3.60012				0.0084
LR	Tassel	only_K	Chr7B_68160074	7B	68160074	0.00062313	3.20542				0.00747
LR	Tassel	only_K	Chr7B_126980493	7B	126980493	0.00075594	3.12151				0.00728
LR	Tassel	only_K	Chr7B_242943680	7B	242943680	0.00037748	3.42311				0.00798
LR	Tassel	only_K	Chr7B_299096366	7B	299096366	0.00039969	3.39828				0.00792
LR	Tassel	only_K	Chr7B_591585540	7B	591585540	0.00051135	3.29128				0.00767
LR	Tassel	only_K	Chr7B_591585546	7B	591585546	0.00051135	3.29128				0.00767
LR	Tassel	only_K	Chr7B_602144904	7B	602144904	1.3113e-15	14.8823				0.03517
LR	Tassel	only_K	Chr7B_602144950	7B	602144950	1.3113e-15	14.8823				0.03517
LR	Tassel	only_K	Chr7B_687389851	7B	687389851	0.00097456	3.01119				0.00702
LR	Tassel	only_K	Chr7D_26126193	7D	26126193	0.0002497	3.60258				0.0084
LR	Tassel	only_K	Chr7D_31022266	7D	31022266	0.00054658	3.26235				0.0076
LR	Tassel	only_K	Chr7D_100643947	7D	100643947	0.00035082	3.45492				0.00647
LR	Tassel	only_K	Chr7D_519100766	7D	519100766	0.0007479	3.12616				0.00729
LR	Tassel	only_K	Chr7D_594683517	7D	594683517	0.00053441	3.27213				0.00763
LR	Tassel	only_K	Chr7D_598868495	7D	598868495	0.00028675	3.5425				0.00826
LR	Tassel	only_K	Chr7D_611401237	7D	611401237	9.9697e-15	14.0013				0.03305
LR	Tassel	only_K	Chr7D_611401245	7D	611401245	3.5152e-16	15.454				0.03654
LR	Tassel	only_K	Chr7D_611401361	7D	611401361	4.6901e-14	13.3288				0.03144
LR	Tassel	only_K	Chr7D_621752885	7D	621752885	0.00026396	3.57846				0.00834
LR	Tassel	only_K	Chr7D_621752898	7D	621752898	0.00031207	3.50575				0.00817
LR	Tassel	only_K	Chr7D_621752900	7D	621752900	0.000303	3.51856				0.0082
LR	Genable		CHR6B_725013662	6B	725013662	5.25156e-15	14.2797	0.0438508		-1.66619		2.70546
LR	Genable		CHR6B_725013676	6B	725013676	5.25156e-15	14.2797	0.0438508		-1.66619		2.70546
LR	Genable		CHR6B_725081102	6B	725081102	1.05534e-16	15.9766	0.0357863		-1.79707		2.59005
LR	Genable		CHR6B_725081146	6B	725081146	1.46092e-16	15.8354	0.0367944		-1.771		2.5836
LR	Genable		CHR6B_725013581	6B	725013581	1.60767e-13	12.7938	0.0448589		-1.56284		2.43238
LR	Genable		CHR6B_726690566	6B	726690566	3.19609e-15	14.4954	0.0241935		-2.00084		2.19672
LR	Genable		CHR6B_726980132	6B	726980132	3.19609e-15	14.4954	0.0241935		-2.00084		2.19672
LR	Genable		CHR6B_729131465	6B	729131465	3.19609e-15	14.4954	0.0241935		-2.00084		2.19672
LR	Genable		CHR6B_729275959	6B	729275959	3.19609e-15	14.4954	0.0241935		-2.00084		2.19672
LR	Genable		CHR6B_729276024	6B	729276024	3.19609e-15	14.4954	0.0241935		-2.00084		2.19672
LR	Genable		CHR6B_729878468	6B	729878468	3.19609e-15	14.4954	0.0241935		-2.00084		2.19672
LR	Genable		CHR6B_730222437	6B	730222437	3.19609e-15	14.4954	0.0241935		-2.00084		2.19672
LR	Genable		CHR6B_730222445	6B	730222445	3.19609e-15	14.4954	0.0241935		-2.00084		2.19672
LR	Genable		CHR6B_726384224	6B	726384224	1.40542e-15	14.8522	0.0297379		-1.78348		2.13315
LR	Genable		CHR6B_726384251	6B	726384251	1.40542e-15	14.8522	0.0297379		-1.78348		2.13315
LR	Genable		CHR6D_492412544	6D	492412544	4.17313e-15	14.3795	0.0226815		-2.00996		2.08146
LR	Genable		CHR6D_492412594	6D	492412594	4.17313e-15	14.3795	0.0226815		-2.00996		2.08146
LR	Genable		CHR6D_493151702	6D	493151702	6.50831e-15	14.1865	0.0221774		-2.02589		2.06866
LR	Genable		CHR7B_602144904	7B	602144904	4.31407e-15	14.3651	0.0221774		-2.02557		2.06801
LR	Genable		CHR7B_602144950	7B	602144950	4.31407e-15	14.3651	0.0221774		-2.02557		2.06801
LR	Genable		CHR6D_492412606	6D	492412606	1.10457e-14	13.9568	0.0231855		-1.93714		1.97532
LR	Genable		CHR6D_492412583	6D	492412583	1.95672e-14	13.7085	0.0221774		-1.97743		1.97088
LR	Genable		CHR6D_492412529	6D	492412529	1.21972e-14	13.9137	0.0221774		-1.96163		1.93952
LR	Genable		CHR6D_492412548	6D	492412548	1.21972e-14	13.9137	0.0221774		-1.96163		1.93952
LR	Genable		CHR6D_492412549	6D	492412549	1.21972e-14	13.9137	0.0221774		-1.96163		1.93952
LR	Genable		CHR6D_492412555	6D	492412555	1.21972e-14	13.9137	0.0221774		-1.96163		1.93952
LR	Genable		CHR6D_492412558	6D	492412558	1.21972e-14	13.9137	0.0221774		-1.96163		1.93952
LR	Genable		CHR6D_494318823	6D	494318823	2.48802e-14	13.6041	0.0211694		-1.98874		1.90483
LR	Genable		CHR6D_492527653	6D	492527653	4.35468e-14	13.361	0.0216734		-1.95663		1.88675
LR	Genable		CHR6B_490980290	6B	490980290	1.52769e-12	11.816	0.0504032		-1.28828		1.84633
LR	Genable		CHR6A_621875764	6A	621875764	1.13007e-13	12.9469	0.0231855		-1.86691		1.83469
LR	Genable		CHR6A_621875765	6A	621875765	1.13007e-13	12.9469	0.0231855		-1.86691		1.83469
LR	Genable		CHR6A_621875768	6A	621875768	1.13007e-13	12.9469	0.0231855		-1.86691		1.83469
LR	Genable		CHR6A_621875835	6A	621875835	1.13007e-13	12.9469	0.0231855		-1.86691		1.83469
LR	Genable		CHR6D_494318841	6D	494318841	9.66672e-14	13.0147	0.0216734		-1.91132		1.80037
LR	Genable		CHR6B_728450946	6B	728450946	6.45425e-13	12.1902	0.0292339		-1.65179		1.7997
LR	Genable		CHR6B_490980286	6B	490980286	7.53899e-12	11.1227	0.0509073		-1.2424		1.73341
LR	Genable		CHR6B_490980317	6B	490980317	7.53899e-12	11.1227	0.0509073		-1.2424		1.73341
LR	Genable		CHR6D_492527672	6D	492527672	4.24543e-13	12.3721	0.0211694		-1.86406		1.67349
LR	Genable		CHR6B_29973795	6B	29973795	2.47562e-12	11.6063	0.0226815		-1.74192		1.56334
LR	Genable		CHR6B_29973800	6B	29973800	2.47562e-12	11.6063	0.0226815		-1.74192		1.56334
LR	Genable		CHR6B_29973882	6B	29973882	2.47562e-12	11.6063	0.0226815		-1.74192		1.56334
LR	Genable		CHR6B_724039929	6B	724039929	1.4309e-07	6.84439	0.0859375		-0.924425		1.56023
LR	Genable		CHR6B_29973886	6B	29973886	3.21378e-12	11.493	0.0236895		-1.69093		1.53702
LR	Genable		CHR6D_490802918	6D	490802918	1.9295e-11	10.7146	0.0332661		-1.41612		1.49898
LR	Genable		CHR6D_490802937	6D	490802937	1.9295e-11	10.7146	0.0332661		-1.41612		1.49898
LR	Genable		CHR6D_490802969	6D	490802969	1.9295e-11	10.7146	0.0332661		-1.41612		1.49898
LR	Genable		CHR6D_490802971	6D	490802971	1.9295e-11	10.7146	0.0332661		-1.41612		1.49898
LR	Genable		CHR6D_490802973	6D	490802973	1.9295e-11	10.7146	0.0332661		-1.41612		1.49898
LR	Genable		CHR6B_726409771	6B	726409771	4.23588e-11	10.3731	0.0171371		-1.90881		1.4264
LR	Genable		CHR7D_611401245	7D	611401245	1.56987e-11	10.8041	0.0191532		-1.77954		1.38275
LR	Genable		CHR6B_722531242	6B	722531242	5.90608e-07	6.2287	0.0854335		-0.859676		1.34215
LR	Genable		CHR6B_490981352	6B	490981352	1.10304e-08	7.95741	0.0519153		-1.0442		1.24738
LR	Genable		CHR7D_611401361	7D	611401361	5.87138e-11	10.2313	0.0181452		-1.71424		1.21686
LR	Genable		CHR6B_722883731	6B	722883731	2.74827e-06	5.56094	0.0856855		-0.815619		1.21134
LR	Genable		CHR7D_611401237	7D	611401237	3.08459e-10	9.5108	0.0196573		-1.62808		1.18724
LR	Genable		CHR2A_590679606	2A	590679606	0.00011379	3.94389	0.0183972		1.65295		1.14681
LR	Genable		CHR6B_721739561	6B	721739561	3.33119e-09	8.4774	0.015877		-1.75996		1.12489
LR	Genable		CHR2A_16203797	2A	16203797	0.000989672	3.00451	0.277974		-0.490728		1.12338
LR	Genable		CHR6B_724685109	6B	724685109	1.39435e-08	7.85563	0.0269657		-1.32892		1.07703
LR	Genable		CHR4B_554311160	4B	554311160	7.67141e-05	4.11512	0.0176411		1.63137		1.07198
LR	Genable		CHR6D_494718668	6D	494718668	1.81961e-09	8.74002	0.015121		-1.72962		1.0355
LR	Genable		CHR6B_558843230	6B	558843230	0.000952797	3.021	0.0612399		0.862138		0.993183
LR	Genable		CHR1B_36369129	1B	36369129	2.54289e-05	4.59467	0.0211694		1.40663		0.952938
LR	Genable		CHR6B_724417696	6B	724417696	1.2896e-06	5.88955	0.0821573		-0.735161		0.947253
LR	Genable		CHR6B_724417703	6B	724417703	1.2896e-06	5.88955	0.0821573		-0.735161		0.947253
LR	Genable		CHR6B_724417707	6B	724417707	1.2896e-06	5.88955	0.0821573		-0.735161		0.947253
LR	Genable		CHR6B_721739585	6B	721739585	9.76778e-08	7.0102	0.0199093		-1.44337		0.944855
LR	Genable		CHR6B_724341331	6B	724341331	7.21853e-07	6.14155	0.0791331		-0.743209		0.935544
LR	Genable		CHR6B_721639559	6B	721639559	8.84632e-08	7.05324	0.015121		-1.62383		0.912703
LR	Genable		CHR6B_724341355	6B	724341355	1.18642e-06	5.92576	0.0796371		-0.723838		0.892573
LR	Genable		CHR6B_724341358	6B	724341358	1.18642e-06	5.92576	0.0796371		-0.723838		0.892573
LR	Genable		CHR6B_724341360	6B	724341360	1.18642e-06	5.92576	0.0796371		-0.723838		0.892573
LR	Genable		CHR6B_724341378	6B	724341378	1.18642e-06	5.92576	0.0796371		-0.723838		0.892573
LR	Genable		CHR6B_724341380	6B	724341380	1.18642e-06	5.92576	0.0796371		-0.723838		0.892573
LR	Genable		CHR6B_724341399	6B	724341399	1.18642e-06	5.92576	0.0796371		-0.723838		0.892573
LR	Genable		CHR6B_724341407	6B	724341407	1.18642e-06	5.92576	0.0796371		-0.723838		0.892573
LR	Genable		CHR4D_396886837	4D	396886837	2.29267e-05	4.63966	0.0115927		1.81457		0.876909
LR	Genable		CHR5A_593642154	5A	593642154	0.000178049	3.74946	0.016129		1.53719		0.871539
LR	Genable		CHR1B_30969672	1B	30969672	0.000157185	3.80359	0.015877		1.54824		0.87053
LR	Genable		CHR1B_31087278	1B	31087278	0.000157185	3.80359	0.015877		1.54824		0.87053
LR	Genable		CHR1B_34688529	1B	34688529	0.000409868	3.38736	0.0166331		1.48247		0.835502
LR	Genable		CHR1B_28234260	1B	28234260	0.000219966	3.65764	0.016381		1.48928		0.830634
LR	Genable		CHR1B_28276370	1B	28276370	0.000219966	3.65764	0.016381		1.48928		0.830634
LR	Genable		CHR1B_28470645	1B	28470645	0.000221317	3.65498	0.0166331		1.47282		0.824657
LR	Genable		CHR1B_41621346	1B	41621346	0.000174035	3.75936	0.0199093		1.34595		0.821612
LR	Genable		CHR1B_30346892	1B	30346892	0.00027172	3.56588	0.016381		1.46836		0.807456
LR	Genable		CHR1B_30676623	1B	30676623	0.000216658	3.66423	0.015625		1.49799		0.802203
LR	Genable		CHR1B_28683922	1B	28683922	0.000141331	3.84976	0.0181452		1.38882		0.79871
LR	Genable		CHR1B_27660422	1B	27660422	0.000294304	3.5312	0.016129		1.45915		0.785296
LR	Genable		CHR1B_26310535	1B	26310535	0.000589475	3.22953	0.016381		1.43707		0.773412
LR	Genable		CHR1B_41770533	1B	41770533	0.000228598	3.64093	0.0196573		1.30867		0.76709
LR	Genable		CHR1B_29104859	1B	29104859	0.000298056	3.5257	0.016129		1.44181		0.766739
LR	Genable		CHR1B_30222918	1B	30222918	0.000298056	3.5257	0.016129		1.44181		0.766739
LR	Genable		CHR4D_15502361	4D	15502361	8.23143e-06	5.08452	0.0133569		1.57347		0.758351
LR	Genable		CHR5A_623905270	5A	623905270	0.000128726	3.89033	0.0176411		1.34728		0.731135
LR	Genable		CHR5A_623905344	5A	623905344	0.000128726	3.89033	0.0176411		1.34728		0.731135
LR	Genable		CHR5A_624045923	5A	624045923	0.000128726	3.89033	0.0176411		1.34728		0.731135
LR	Genable		CHR6B_45583663	6B	45583663	0.000499291	3.30165	0.0168851		1.37278		0.727101
LR	Genable		CHR1B_28679980	1B	28679980	0.000512253	3.29052	0.015121		1.44885		0.726601
LR	Genable		CHR1B_26614199	1B	26614199	0.000690897	3.16059	0.0126008		1.58191		0.723674
LR	Genable		CHR1B_36401065	1B	36401065	0.00034334	3.46428	0.0206653		1.2389		0.721989
LR	Genable		CHR1B_36401074	1B	36401074	0.00034334	3.46428	0.0206653		1.2389		0.721989
LR	Genable		CHR1B_36403844	1B	36403844	0.00034334	3.46428	0.0206653		1.2389		0.721989
LR	Genable		CHR1B_36403868	1B	36403868	0.00034334	3.46428	0.0206653		1.2389		0.721989
LR	Genable		CHR1B_36403894	1B	36403894	0.00034334	3.46428	0.0206653		1.2389		0.721989
LR	Genable		CHR3B_462389591	3B	462389591	8.47084e-06	5.07207	0.047379		-0.828357		0.719827
LR	Genable		CHR6D_488659083	6D	488659083	0.000204702	3.68888	0.0181452		1.29868		0.698395
LR	Genable		CHR1B_35229516	1B	35229516	0.000958792	3.01828	0.0168851		1.34483		0.697796
LR	Genable		CHR6A_606149021	6A	606149021	0.000961652	3.01698	0.0337702		0.959117		0.697661
LR	Genable		CHR6A_606149069	6A	606149069	0.000961652	3.01698	0.0337702		0.959117		0.697661
LR	Genable		CHR1B_30444246	1B	30444246	6.64276e-07	6.17765	0.015625		-1.39365		0.69434
LR	Genable		CHR5A_623726683	5A	623726683	3.77686e-05	4.42287	0.0136089		1.46545		0.670036
LR	Genable		CHR1B_42967340	1B	42967340	0.000838985	3.07625	0.0194052		1.22657		0.665394
LR	Genable		CHR1B_42981967	1B	42981967	0.000838985	3.07625	0.0194052		1.22657		0.665394
LR	Genable		CHR5B_554958965	5B	554958965	0.00049261	3.3075	0.298639		0.368104		0.659653
LR	Genable		CHR7A_31211032	7A	31211032	0.00068897	3.1618	0.446573		0.33832		0.657499
LR	Genable		CHR6A_618000932	6A	618000932	1.2584e-05	4.90018	0.0599798		-0.704072		0.649626
LR	Genable		CHR7A_572577493	7A	572577493	0.000252048	3.59852	0.114919		-0.521668		0.643356
LR	Genable		CHR5A_622412216	5A	622412216	1.00999e-05	4.99568	0.0110887		1.5776		0.634339
LR	Genable		CHR2B_749789254	2B	749789254	0.000804142	3.09467	0.212702		0.398618		0.618458
LR	Genable		CHR2B_749789329	2B	749789329	0.000804142	3.09467	0.212702		0.398618		0.618458
LR	Genable		CHR1B_36712468	1B	36712468	0.000634135	3.19782	0.0199093		1.16563		0.616212
LR	Genable		CHR5B_399496143	5B	399496143	0.000868198	3.06138	0.495464		0.322539		0.604444
LR	Genable		CHR3A_577507436	3A	577507436	0.000319093	3.49608	0.0345262		-0.876271		0.594913
LR	Genable		CHR5B_555090220	5B	555090220	0.000779926	3.10795	0.285534		0.352955		0.590697
LR	Genable		CHR2A_608863587	2A	608863587	0.000425427	3.37117	0.405242		-0.320392		0.575049
LR	Genable		CHR6B_721661195	6B	721661195	1.20509e-05	4.91898	0.0241935		-1.021		0.572006
LR	Genable		CHR3B_462389618	3B	462389618	7.31555e-05	4.13575	0.0458669		-0.744161		0.563287
LR	Genable		CHR1A_11339042	1A	11339042	5.86535e-05	4.23171	0.0723286		-0.600593		0.562537
LR	Genable		CHR2A_609001657	2A	609001657	0.000499662	3.30132	0.403226		-0.315603		0.557093
LR	Genable		CHR6A_456287682	6A	456287682	0.000985101	3.00652	0.0456149		0.739967		0.554042
LR	Genable		CHR5A_621817306	5A	621817306	4.15059e-05	4.38189	0.0126008		1.38388		0.55383
LR	Genable		CHR5A_621822443	5A	621822443	4.15059e-05	4.38189	0.0126008		1.38388		0.55383
LR	Genable		CHR5A_622343655	5A	622343655	4.15059e-05	4.38189	0.0126008		1.38388		0.55383
LR	Genable		CHR5A_622602643	5A	622602643	4.15059e-05	4.38189	0.0126008		1.38388		0.55383
LR	Genable		CHR5A_622602706	5A	622602706	4.15059e-05	4.38189	0.0126008		1.38388		0.55383
LR	Genable		CHR5A_622602725	5A	622602725	4.15059e-05	4.38189	0.0126008		1.38388		0.55383
LR	Genable		CHR5A_622609534	5A	622609534	4.15059e-05	4.38189	0.0126008		1.38388		0.55383
LR	Genable		CHR5A_622609567	5A	622609567	4.15059e-05	4.38189	0.0126008		1.38388		0.55383
LR	Genable		CHR5A_622717375	5A	622717375	4.15059e-05	4.38189	0.0126008		1.38388		0.55383
LR	Genable		CHR5A_622855549	5A	622855549	4.15059e-05	4.38189	0.0126008		1.38388		0.55383
LR	Genable		CHR5A_623081428	5A	623081428	4.15059e-05	4.38189	0.0126008		1.38388		0.55383
LR	Genable		CHR5A_623385256	5A	623385256	4.15059e-05	4.38189	0.0126008		1.38388		0.55383
LR	Genable		CHR5A_623386076	5A	623386076	4.15059e-05	4.38189	0.0126008		1.38388		0.55383
LR	Genable		CHR5A_623389296	5A	623389296	4.15059e-05	4.38189	0.0126008		1.38388		0.55383
LR	Genable		CHR6D_492544185	6D	492544185	8.11951e-06	5.09047	0.0282258		-0.929967		0.551359
LR	Genable		CHR6B_40596232	6B	40596232	2.53165e-05	4.5966	0.0108367		1.47573		0.54258
LR	Genable		CHR7A_575303554	7A	575303554	0.000846018	3.07262	0.109627		-0.4875		0.53917
LR	Genable		CHR5A_621816621	5A	621816621	5.54316e-05	4.25624	0.0105847		1.47989		0.533093
LR	Genable		CHR5A_622412244	5A	622412244	5.54316e-05	4.25624	0.0105847		1.47989		0.533093
LR	Genable		CHR5A_623716591	5A	623716591	5.54316e-05	4.25624	0.0105847		1.47989		0.533093
LR	Genable		CHR5A_623730615	5A	623730615	5.54316e-05	4.25624	0.0105847		1.47989		0.533093
LR	Genable		CHR5A_623905238	5A	623905238	5.54316e-05	4.25624	0.0105847		1.47989		0.533093
LR	Genable		CHR5A_624027213	5A	624027213	5.54316e-05	4.25624	0.0105847		1.47989		0.533093
LR	Genable		CHR5A_624027289	5A	624027289	5.54316e-05	4.25624	0.0105847		1.47989		0.533093
LR	Genable		CHR1D_486562382	1D	486562382	0.000496753	3.30386	0.106855		0.489912		0.532402
LR	Genable		CHR6B_722084249	6B	722084249	0.00078756	3.10372	0.111391		-0.480076		0.530235
LR	Genable		CHR7A_576017774	7A	576017774	0.00097277	3.01199	0.109879		-0.481824		0.52775
LR	Genable		CHR5A_624394515	5A	624394515	6.65466e-05	4.17687	0.0100806		1.50295		0.523922
LR	Genable		CHR7A_695116702	7A	695116702	0.000654325	3.18421	0.0796371		0.55298		0.520931
LR	Genable		CHR1A_11341756	1A	11341756	0.000295454	3.52951	0.15121		-0.417821		0.520773
LR	Genable		CHR7A_695458113	7A	695458113	0.000665084	3.17712	0.0793851		0.553194		0.519826
LR	Genable		CHR4B_19209086	4B	19209086	0.000498698	3.30216	0.258821		-0.341158		0.518945
LR	Genable		CHR6A_618000978	6A	618000978	8.369e-05	4.07733	0.0725806		-0.565182		0.499759
LR	Genable		CHR6B_295058274	6B	295058274	0.000244503	3.61172	0.0927419		0.504838		0.498424
LR	Genable		CHR7A_695115987	7A	695115987	0.000889458	3.05087	0.0791331		0.54107		0.495849
LR	Genable		CHR7A_695572155	7A	695572155	0.000865411	3.06278	0.0821573		0.530348		0.492974
LR	Genable		CHR1A_581343271	1A	581343271	0.000552581	3.2576	0.0274698		0.888244		0.489903
LR	Genable		CHR1A_11338418	1A	11338418	0.000793733	3.10033	0.212954		-0.352654		0.484473
LR	Genable		CHR5A_619708723	5A	619708723	0.000131375	3.88149	0.0110887		1.37615		0.48268
LR	Genable		CHR5A_624081594	5A	624081594	0.000141667	3.84873	0.0108367		1.3823		0.476057
LR	Genable		CHR5A_624045874	5A	624045874	0.000224059	3.64964	0.0110887		1.34991		0.464443
LR	Genable		CHR4D_147800578	4D	147800578	0.00051758	3.28602	0.0141129		-1.1925		0.459884
LR	Genable		CHR4D_167634708	4D	167634708	0.00051758	3.28602	0.0141129		-1.1925		0.459884
LR	Genable		CHR4D_177039138	4D	177039138	0.00051758	3.28602	0.0141129		-1.1925		0.459884
LR	Genable		CHR4D_223181650	4D	223181650	0.00051758	3.28602	0.0141129		-1.1925		0.459884
LR	Genable		CHR3B_53685308	3B	53685308	8.80413e-05	4.05531	0.0509073		-0.637254		0.456037
LR	Genable		CHR1A_11338370	1A	11338370	0.000693159	3.15917	0.133065		-0.409669		0.449989
LR	Genable		CHR5B_558083273	5B	558083273	0.000982992	3.00745	0.196321		-0.349698		0.448458
LR	Genable		CHR5A_459494322	5A	459494322	0.000848797	3.0712	0.0685484		0.546796		0.443706
LR	Genable		CHR4D_513934856	4D	513934856	8.63034e-05	4.06397	0.0544355		-0.606315		0.439801
LR	Genable		CHR5A_655051479	5A	655051479	0.000414251	3.38274	0.0138609		1.1571		0.42536
LR	Genable		CHR5A_655070356	5A	655070356	0.000414251	3.38274	0.0138609		1.1571		0.42536
LR	Genable		CHR3B_462389327	3B	462389327	0.0004643	3.3332	0.0428427		-0.660147		0.415364
LR	Genable		CHR4D_513934862	4D	513934862	0.000156243	3.8062	0.0549395		-0.583358		0.410679
LR	Genable		CHR4D_513934870	4D	513934870	0.000156243	3.8062	0.0549395		-0.583358		0.410679
LR	Genable		CHR4D_513934883	4D	513934883	0.000156243	3.8062	0.0549395		-0.583358		0.410679
LR	Genable		CHR4D_513934892	4D	513934892	0.000156243	3.8062	0.0549395		-0.583358		0.410679
LR	Genable		CHR4D_513934904	4D	513934904	0.000156243	3.8062	0.0549395		-0.583358		0.410679
LR	Genable		CHR4D_513934882	4D	513934882	0.000171857	3.76483	0.0544355		-0.581339		0.404315
LR	Genable		CHR4D_513934902	4D	513934902	0.000171857	3.76483	0.0544355		-0.581339		0.404315
LR	Genable		CHR4A_681101889	4A	681101889	0.000731485	3.13579	0.030494		0.754325		0.390992
LR	Genable		CHR5A_655038415	5A	655038415	0.000809275	3.0919	0.0143649		1.08784		0.38944
LR	Genable		CHR5A_655052749	5A	655052749	0.000809275	3.0919	0.0143649		1.08784		0.38944
LR	Genable		CHR5A_655055231	5A	655055231	0.000809275	3.0919	0.0143649		1.08784		0.38944
LR	Genable		CHR7D_385576	7D	385576	0.000864644	3.06316	0.0201613		0.918212		0.38712
LR	Genable		CHR2A_1845266	2A	1845266	0.000871615	3.05968	0.0105847		-1.2591		0.385891
LR	Genable		CHR6B_690276721	6B	690276721	0.00075596	3.1215	0.046875		0.604312		0.379229
LR	Genable		CHR6B_690294483	6B	690294483	0.000927973	3.03246	0.0481351		0.591297		0.372336
LR	Genable		CHR4A_644316269	4A	644316269	0.000624041	3.20479	0.0292339		0.746296		0.367375
LR	Genable		CHR7D_100643947	7D	100643947	0.000627104	3.20266	0.0110887		1.17039		0.349132
LR	Genable		CHR5D_486791040	5D	486791040	0.000121588	3.91511	0.0241935		0.788244		0.340935
LR	Genable		CHR5D_486790987	5D	486790987	0.000119339	3.92322	0.0241935		0.788166		0.340867
LR	Genable		CHR5B_117579194	5B	117579194	0.000763689	3.11708	0.0302419		0.700355		0.334347
LR	Genable		CHR5B_117579227	5B	117579227	0.000763689	3.11708	0.0302419		0.700355		0.334347
LR	Genable		CHR5B_117579230	5B	117579230	0.000763689	3.11708	0.0302419		0.700355		0.334347
LR	Genable		CHR5B_117579250	5B	117579250	0.000763689	3.11708	0.0302419		0.700355		0.334347
LR	Genable		CHR4A_747910226	4A	747910226	0.000812152	3.09036	0.0221774		0.813327		0.333418
LR	Genable		CHR6B_641861787	6B	641861787	0.000840468	3.07548	0.0206653		-0.841529		0.333119
LR	Genable		CHR5D_568629336	5D	568629336	0.000274961	3.56073	0.0231855		0.786809		0.325877
LR	Genable		CHR5B_117579224	5B	117579224	0.00097641	3.01037	0.030746		0.677738		0.318154
LR	Genable		CHR4D_12851259	4D	12851259	0.000851409	3.06986	0.047631		0.536816		0.303832
LR	Genable		CHR4A_752114875	4A	752114875	0.000959581	3.01792	0.0393145		0.555424		0.270813
LR	Genable		CHR4A_752114926	4A	752114926	0.000959581	3.01792	0.0393145		0.555424		0.270813
LR	Genable		CHR5D_486791077	5D	486791077	0.000965847	3.01509	0.0206653		0.732837		0.252625

## Sheet: Supplementary Table S4
Supplementary Table S4: Comparison of identified peak markers in this study with previously published studies for YR.
QTL	Identified marker	chromosome	Position (bp)	Position (cM)	Author
QYrpd.swust-1AS	IWB22569—IWB6621	1A	2.12653e+06		Zhou et al. 2022b
	IWB7628	1A	3100000		Mahmood et al. 2022
	1A_3878168	1A	3900000		Mahmood et al. 2022
	IWB4201	1A	4000000		Mahmood et al. 2022
QYr.caas-1AS	Xgwm136—Xcfd15	1A	9017647		Wang et al. 2021a
QYrus.vt-1AS	cfa2153—wPt671698	1A	9660771		Christopher et al. 2013a
	S1A_11751907	1A	11751907		Sharma et al. 2025
QYr.AYH-1AS	AX-110567377—AX-111086914	1A	2.48805e+07		Long et al. 2021
QYr.sgi-1A	s15m19D—wPt3698	1A	32627471		Prins et al. 2011
	S1A_35182229	1A	35182229		Sharma et al. 2025
QYr.lrdc-1A.1	Tdurum_contig47183_205	1A	44520633		Farzand et al. 2022
QYr.hebau-1AL	AX-109403007—AX-110502416	1A	1.75271e+08		Gebrewahid et al. 2020a
QYr.hebau-1AL	gwm164—wmc611	1A	2.43659e+08		Yan et al. 2021
	S1A_332277563	1A	332277563		Sharma et al. 2025
	wPT-6005—wPT-4709	1A	356099419		Roseswarne et al. 2012
QYr.caas-1AL	XwPt-2406—Xwmc59	1A	3.91591e+08		Ren et al. 2012a
	S1A_402131971	1A	402131971		Sharma et al. 2025
QYr.gaas-1AL	AX-111218361—AX-110577861	1A	508124228		Bai et al. 2022
	S1A_528048727	1A	528048727		Sharma et al. 2025
	IWB21700	1A	5.343e+08		Mahmood et al. 2022
QYr.spa-1A	Kukri_c13463_728—Excalibur_rep_c110054_341	1A	5.4512e+08		Bokore et al. 2017
	1A_560487941	1A	560500000		Mahmood et al. 2022
QYr.lrdc-1A.2	Kukri_c52420_112	1A	566250000		Farzand et al. 2022
QYr.cim-1AL	987869|F|0_42:A>C—989816|F|0_24:A>C	1A	570350000		Liu et al. 2022
QYr.ramp-1A.1	AX-94448779	1A	572100000		Kumar et al. 2020
QYrsv.swust-1AL	IWB31650—IWB36087	1A	573154736		Zhou et al. 2021b
QYr.spa-1A	Excalibur_c16947_114—Ra_c2227_825	1A	579359562		Bokore et al. 2017
	IWB710188	1A	581500000		Mahmood et al. 2022
QYrPI197734.wgp-1A	IWA2015—IWB6759	1A	5.92076e+08		Liu et al. 2020a
QYr.uaf-1A.1	IWB3662	1A		10.69	Habib et al. 2020
QYr.uaf.1AL	gwm106–cfd22	1AL		60–65	Muhammad et al. 2020
QYrSW.wgp- 1A	IWA414	1AS		43	Liu et al. 2020
QYr.uaf.1AS	gwm136–gwm33	1AS		12–27	Muhammad et al. 2020
QYr.cim-1BS	4991863|F|0–7:C>A—1043386|F|0–14:A>G	1B	5350000		Zhang et al. 2022
	S1B_7245353	1B	7245353		Sharma et al. 2025
	S1B_7915711	1B	7915711		Sharma et al. 2025
	IWB8591698	1B	8600000		Mahmood et al. 2022
Yr84	usw316	1B	10007576		Klymiuk et al. 2022
QYr.caas-1BL.1RS	Xgdm33a—Xbarc8	1B	24309796		Ren et al. 2012a
Qyr.gaas.1B	AX-111572690—AX-94847267	1B	2.54806e+07		Cheng e al. 2022
	S1B_34102555*	1B	34102555		Sharma et al. 2025
Yr85	IWA2583—IWA7480	1B	4.06183e+07		Feng et al. 2023
Yr15	TraesCS1B03G0201000	1B	68210000		Klymiuk et al. 2018
	Yr15*	1B	73459000		Sharma et al. 2025
Yr64	Xgwm413—Xgdm33	1B	78879608		Cheng et al. 2014
QYr.ramp-1B.1	AX-95119512	1B	82400000		Kumar et al. 2020
	IWB864963	1B	86800000		Mahmood et al. 2022
	IWB2120	1B	106800000		Mahmood et al. 2022
	AX-94716205	1B	128000000		Khan et al. 2024
	S1B_141655194*	1B	141655194		Sharma et al. 2025
QYr.wrsggl1-1BS	Xbarc187—Xcfd59	1B	1.7706e+08		Kandel et al. 2017
QYrco.wpg-1B.2	Xbarc119—Xbarc137	1B	195771496		Case et al. 2014
Yr65	Xgwm18—Xgwm11	1B	2.25283e+08		Cheng et al. 2014
QYr.ramp-1B.3	AX-94768106	1B	239000000		Kumar et al. 2020
	IWB72742	1B	300600000		Mahmood et al. 2022
	S1B_306441085	1B	306441085		Sharma et al. 2025
	S1B_308703553	1B	308703553		Sharma et al. 2025
	IWB49173	1B	327800000		Mahmood et al. 2022
	1B_338552631	1B	338600000		Mahmood et al. 2022
QYrdr.wgp-1BL.1	Xwmc611—Xwmc694	1B	3.53555e+08		Hou et al. 2015
	542318	1B	397669464		El Messoadi et al. 2022
QYr.cim-1BL	wPt-1770—wPt-9028	1B	412530997		Pretorius et al. 2017
QYr.sicau-1B.1	Xwmc156—Xwmc216	1B	416918064		Ma et al. 2019
QYr1B	1B_458497993	1B	458497993		Huang et al. 2024
QYrcw.nwafu-1BL (Yr29/Lr46)	AX-95026093—AX-94701609	1B	488479985		Zeng et al. 2019a
QYrpd.swust-1BL	IWB42604—IWB10630	1B	5.27372e+08		Zhou et al. 2022b
	wPT-6240—wPT-8168	1B	532624047		Roseswarne et al. 2012
QYr.spa-1B	RAC875_c9082_267—Tdurum_contig61914_169	1B	5.78973e+08		Bokore et al. 2017
	S1B_613082642	1B	613082642		Sharma et al. 2025
	1B_633336851	1B	633300000		Mahmood et al. 2022
QYrsv.swust-1BL.1	IWB11625—IWA3497	1B	6.46946e+08		Zhou et al. 2021b
QYr.rcrrc.1B	3953714—1001398	1B	667100000		Tehseen et al. 2022
QYr.spa-1B	BobWhite_c40868_120—wsnp_Ra_c53181_56932563	1B	667280413		Bokore et al. 2017
QYr.sdau-1B	KASP_63005—KASP_19405	1B	667550000		Pang et al. 2022
QYr.ucw-1BL	IWA3998—IWA7892	1B	669136731		Cobo et al. 2018
QYr.cim-1BL	cslv46G22—4005225|F|0_9:T>G	1B	670050000		Liu et al. 2022
QYr.hbau-1BL	AX-110946149—Lr46/Yr29	1B	671231404		Gebrewahid et al. 2020b
QYr.sicau-1B.3	AX-108726041—AX-111548801	1B	675422555		Ma et al. 2019
QYrPI181410.wgp-1BL	IWB6507—IWB72918	1B	675644436		Liu et al. 2020b
Qyr.gaas.1B.1	AX-108745931—AX-108726041	1B	6.759e+08		Cheng e al. 2022
QYr.crc-1BL	Bobwhite_c8293_236—CsLV46	1B	676513583		Rosa et al. 2019
QYr.spa-1B	CAP7_rep_c6352_375—wsnp_Ex_c38849_46284348	1B	6.76645e+08		Bokore et al. 2017
QYrsn.nwafu-1BL	AX-108745708—AX-110483673	1B	676978460		Huang et al. 2021
QYr.sicau-1BL	AX-111056129—AX-108839316	1B	6.7758e+08		Wang et al. 2022a
QYrdr.wgp-1BL.2	IWA3893—Xgwm259	1B	678968736		Hou et al. 2015
QYrsk.wgp-1BL	IWB14436—IWB34471	1B	6.79017e+08		Liu et al. 2019
QYrsv.swust-1BL.2	IWB5732—IWB9706	1B	679751961		Zhou et al. 2021b
QYr.cim-1BL	wPt-1770—csLV46G22	1B	680295106		Calvo-Salazar et al. 2015
QYr.hebau-1BL	AX-109898596—AX-109273019	1B	6.80703e+08		Gebrewahid et al. 2020a
QYrCW357-1BL	AX-110020417	1B	682161338		Huang et al. 2022
QPst.jic-1B	Xgwm259—Xgwm818	1B	682614103		Melichar et al. 2008
QYr.hebau-1BL	AX-109299717—AX-109892648	1B	683202048		Zhang et al. 2019c
	1B_683306760	1B	683300000		Mahmood et al. 2022
	Xgwm818—XcsLV46	1B	683994606		Roseswarne et al. 2012
QYr.nwafu-1BL.3 (Yr29)	AX-94871279—AX-109346236	1B	684306397		Liu et al. 2023
	Xgwm140—Xgwm259	1B	687653631		William et al. 2006
QYr.ucw-1B	3892	1B	1234000000		Maccaferri et al. 2015
	AX-94843704	1B	3953000000		Khan et al. 2024
1WA1191	IWA3155,IWA7480	1B		23.65	Muleta et al. 2017
QYr.uaf-1B.1	IWB12258	1B		28.76	Habib et al. 2020
IWA5861	IWA3017	1B		94.2	Muleta et al. 2017
QYr.uaf.1BL.1	gwm264–wmc619	1BL1		21	Muhammad et al. 2020
QYr.uaf.1BL.2	gpw4478–gpw4002	1BL2		39–42	Muhammad et al. 2020
QYr.uaf.1BL.3	gwm4410	1BL3		58	Muhammad et al. 2020
QYr.hbaas-1BS	IWB45438	1Bs	97000000		Shewabez et al. 2025
QYrSW.wgp-1B	IWM 1553	1BS		65	Liu et al. 2020
Yr15	Yr15.R5	1BS			Liu et al. 2020
QYr.caas-1DS	XUgwm353—Xgdm33b	1D	1726237		Ren et al. 2012a
QYrdr.wgp-1DS	Xwmc432—IWA2268	1D	4438743		Hou et al. 2015
Start	Chr1D_8677328	1D	6077328		Soleimain and Pfrieme et al. 2026
QYryz.caas-1DS	AX-108987790—AX-111722085	1D	8.09639e+06		Zhu et al. 2023
Marker	Chr1D_8677328	1D	8677328		Soleimain and Pfrieme et al. 2026
QYrst.orr-1DS	wPt-9181—wPt-7946	1D	1.01883e+07		Vazquez et al. 2012
QYrsn.nwafu-1DS	AX-110480216—AX-111475929	1D	1.02271e+07		Huang et al. 2021
Qyr.gaas.1D.1	AX-94444445—AX-95126907	1D	10230084		Cheng et al. 2022
End	Chr1D_8677328	1D	11277328		Soleimain and Pfrieme et al. 2026
Qyr.gaas.1D	AX-110147378—AX-109183884	1D	1.17948e+07		Cheng e al. 2022
Qyr.nwafu-1DS	AX-111540850—AX-111853381	1D	1.69795e+07		Liu et al. 2023
	596610	1D	100819278		El Messoadi et al. 2022
	S1D_244679388	1D	244679388		Sharma et al. 2025
QYr.ramp-1D.2	AX-94911855	1D	342600000		Kumar et al. 2020
	S1D_380486701	1D	380486701		Sharma et al. 2025
QYrpd.swust-1DL	IWB59384—IWB27489	1D	3.81205e+08		Zhou et al. 2022b
QYr.hbau-1DL	AX-111135128—AX-111085909	1D	464889976		Gebrewahid et al. 2020b
QYr.ucw-1D	980	1D	493000000		Maccaferri et al. 2015
QYr.uaf-1D.1	IWA7171	1D		90.3	Habib et al. 2020
QYr.uaf-1D.2	IWA4344	1D		90.3	Habib et al. 2020
QYr.hbaas-1DS	IWA1787	1Ds	86000000		Shewabez et al. 2025
QYr.uaf.1DS	wmc432–cfd15	1DS		23	Muhammad et al. 2020
Yr27	sunKASP-48	2 BS			Liu et al. 2020
QYr51V.Isgp2B. 1	1WA2678	2111..		114	Liu et al. 2020
QYr.ramp-2A.1	AX-94691448	2A	0		Kumar et al. 2020
QYr.sun-2A	wPt-7285—wPt-1722	2A	6548		Bansal et al. 2013
Yr17	barc212—SC-Y15	2A	1639807		Paillard et al. 2012
	Yr17	2A	5814790		Sharma et al. 2025
QYr.sicau-2AS	AX-111557864—AX-111015252	2A	7.89228e+06		Wang et al. 2022a
QYr.hebau-2AS	Xbarc1138—Xcfd36	2A	8552163		Zhang et al. 2019c
QYrtb.orz-2AS	408426—cfd36	2A	14570089		Vazquez et al. 2015
QYr.lrdc-2A.1	VPM	2A	20450000		Farzand et al. 2022
Qyr.gaas.2A	cfd36—AX-110576889	2A	2.54602e+07		Cheng e al. 2022
QYrva.vt-2AS	wpt7721—Xgwm296b	2A	2.62642e+07		Christopher et al. 2013b
QYrsv.swust-2AS	IWB7877—IWB72720	2A	28307082		Zhou et al. 2021b
QYr.ucw-2AS	wPt-3896—cfa2201	2A	3.07578e+07		Lowe et al. 2011
QYr.cim-2AS	1208841—978751	2A	3.235e+07		Liu et al. 2022
QYr.ufs-2A	wPt-733314—wPt-0003	2A	34457572		Agenbag et al. 2012
QYr.GX-2AS	AX-109957471—AX-110026721	2A	39478586		Wang et al. 2021b
QYr.hebau-2AS	AX-111018125—AX-110099691	2A	41450471		Gebrewahid et al. 2020a
	S2A_48981829	2A	48981829		Sharma et al. 2025
QYr.ucw-2A.2	422	2A	99000000		Maccaferri et al. 2015
	S2A_117368947	2A	117368947		Sharma et al. 2025
	wmc382—gwm071d	2A	1.41308e+08		Christiansen et al. 2006
	S2A_177465383	2A	177465383		Sharma et al. 2025
QYr.cim-2AS	Xbarc124—wPt-1722	2A	2.38501e+08		Calvo-Salazar et al. 2015
QYrpd.swust-2AS	IWB62645—IWB52560	2A	2.47624e+08		Zhou et al. 2022b
QYr.uga-2AS	Xbarc124—Xgwm359	2A	251382830		Hao et al. 2011
	S2A_310582367	2A	310582367		Sharma et al. 2025
	S2A_315490348	2A	315490348		Sharma et al. 2025
QYrsn.nwafu-2AS.2	AX-108857922—AX-111730999	2A	3.28252e+08		Huang et al. 2021
QYr.inra-2AL	Xgwm382a—Xgwm359	2A	338180300		Mallard et al. 2005
	S2A_362922651	2A	362922651		Sharma et al. 2025
	S2A_367020239	2A	367020239		Sharma et al. 2025
	S2A_455472689	2A	455472689		Sharma et al. 2025
QYrns.orz-2AL	wPt-7011—wPt-7024	2A	468136179		Vazquez et al. 2015
	S2A_480477702	2A	480477702		Sharma et al. 2025
	S2A_485057429	2A	485057429		Sharma et al. 2025
QYr.nwafu-2AL	AX-94417710—AX-111141805	2A	4.96828e+08		Liu et al. 2021a
QYrCW357-2AL	AX-110974948	2A	5.32297e+08		Huang et al. 2022
QYr.sicau-2AL	AX-110943358—AX-109879152	2A	533747796		Wang et al. 2022a
Yr32	Xwmc198	2A	5.35027e+08		Eriksen et al. 2004
	2A-566856454	2A	566900000		Mahmood et al. 2022
	S2A_592670282	2A	592670282		Sharma et al. 2025
QYr.spa-2A	BobWhite_c2002_100—BobWhite_c6356_87	2A	5.94936e+08		Bokore et al. 2017
QYr.lrdc-2A.2	BS00022301_51	2A	601226987		Farzand et al. 2022
	S2A_638603325	2A	638603325		Sharma et al. 2025
QYr.spa-2A	BS00041816_51—BS00022241_51	2A	641027272		Bokore et al. 2017
	S2A_649238188	2A	649238188		Sharma et al. 2025
	S2A_651459425	2A	651459425		Sharma et al. 2025
Qyr.gaas.2A.1	AX-110538140—AX-110155009	2A	6.53104e+08		Cheng e al. 2022
	wmc198a—wmc181	2A	654089966		Christiansen et al. 2006
	S2A_655524120	2A	655524120		Sharma et al. 2025
	S2A_658468345	2A	658468345		Sharma et al. 2025
QYr.inra-2AL	gpw4496—gwm294	2A	689671363		Paillard et al. 2012
QYr.ifa-2AL	wPt-8596—Xgwm312	2A	712796006		Buerstmayr et al. 2014
QYrqn.nwafu-2AL	Xwmc170—AX-94895021	2A	715305189		Zeng et al. 2019c
QYryz.caas-2AL (Yr86)	AX-110122753—AX-110429464	2A	715473499		Zhu et al. 2023
	725783	2A	726086162		El Messoadi et al. 2022
QYr.rcrrc.2A	1091012—4991129	2A	7.5635e+08		Tehseen et al. 2022
QYr.cim-2AL	5370736|F|0–13:C>T—1269847|F|0–7:T>A	2A	7.6365e+08		Zhang et al. 2022
QYr.ucw-2A.3		2A	783000000		Maccaferri et al. 2015
QYr.uaf-2A.1	IWB50806	2A		81.49	Habib et al. 2020
QYr.uaf-2A.2	IWA7638	2A		162.89	Habib et al. 2020
QYrSW.wgp.2A.3	IW8165	2AL		156	Liu et al. 2020
QYr.uaf.2AL	gwm66–gwm558	2AL		45–48	Muhammad et al. 2020
	2A_9121927	2AS	9121927		Juliana et al. 2020
	2A_14418760	2AS	14418760		Juliana et al. 2020
	2A_I4978553	2AS	14978553		Juliana et al. 2020
	2A_I 5449240	2AS	15449240		Juliana et al. 2020
	2A_17830617	2AS	17830617		Juliana et al. 2020
	2A_18495181	2AS	18495181		Juliana et al. 2020
QYr.hbaas-2AS	IWB25308	2AS	138000000		Shewabez et al. 2025
QYr.uaf.2AS	mag3911	2AS		9	Muhammad et al. 2020
QYrSW.wgp2A.1	IWI156733	2AS		30	Liu et al. 2020
QYrSW.wgpA.2	IWA4714	2AS		44	Liu et al. 2020
Yr17	Yr17-KASP	2AS			Liu et al. 2020
QYr.niab-2B	wPt-7200—wPt-4002	2B	17273		Powell et al. 2013
QYr.inra-2BS	Xgwm210a—Xfbb67c	2B	6842734		Dedryver et al. 2009
QYrsv.swust-2BS	IWB32200—IWB22938	2B	7421120		Zhou et al. 2021b
QYr.spa-2B.1	wPt-1964—Xwmc154	2B	3.20054e+07		Singh et al. 2014
QYr.cim-2BS	wPt-3949—wPt-8072	2B	37997661		Calvo-Salazar et al. 2015
Qyr.gaas.2B	AX-109528193—AX-110426897	2B	4.19733e+07		Cheng e al. 2022
	S2B_48062121	2B	48062121		Sharma et al. 2025
QYr.spa-2B	Tdurum_contig29563_183—BS00003613_51	2B	5.13704e+07		Bokore et al. 2017
QYr.pa-2B	wsnp_Ex_c19260_28187434—BobWhite_c41535_52	2B	5.20616e+07		Bokore et al. 2017
QYr.sgi-2B.1	barc200—wPt6278	2B	54649705		Prins et al. 2011
QYr.lrdc-2B	Tdurum_contig54704_176	2B	57800000		Farzand et al. 2022
	412394	2B	64091432		El Messoadi et al. 2022
QYrlu.cau-2BS1	Xwmc154—Xgwm148	2B	74844886		Guo et al. 2008
QYr.ucw-2BS	IWA8420—wmc477	2B	76334582		Cobo et al. 2018
QYrid.ui-2B.1	wPt-9668—Xgwm429	2B	81165619		Chen et al. 2012
QYrid.ui-2B.2	Xgwm429—Xbarc91	2B	81165619		Chen et al. 2012
QYr.sgi-2B.1	Xgwm148—s12m60A	2B	108458841		Ramburan et al. 2004
QYrlo.wpg-2BS	Xwmc474—Xgwm148	2B	115386259		Carter et al. 2009
QYr.cim-2BS	YrF—wmc474	2B	122313677		Pretorius et al. 2017
QYr.hebau-2BS	AX-110578293—AX-111507209	2B	134249898		Gebrewahid et al. 2020a
QYrhm.nwafu-2BC	IWB26631—IWB40714	2B	139941841		Yuan et al. 2018
Qyryac.nwafu-2BS	BS00022657_51—IACX6411	2B	141086931		Li et al. 2017b
	IWB73197	2B	152200000		Mahmood et al. 2022
	28_152503636	2BS	152503636		Juliana et al. 2020
	28_153613233	2BS	153613233		Juliana et al. 2020
	28_155142247	2BS	155142247		Juliana et al. 2020
	28_155155706	2BS	155155706		Juliana et al. 2020
	28_157266347	2BS	157266347		Juliana et al. 2020
QYr.sgi-2B.1	Xbarc55—Xwmc344	2B	1.5747e+08		Agenbag et al. 2014
	RAC875_c1226_652	2B	157693607		Shahinnia et al. 2022
Qyrlov.nwafu-2BS	IWA5830—IWA5377	2B	160363754		Wu et al. 2017
	2B_163977776	2B	164000000		Mahmood et al. 2022
QYrel.wgp-2BS	IWB11750—IWB27810	2B	1.81681e+08		Liu et al. 2019b
Qyr.nwafu-2BS	AX-111559203—AX-112285965	2B	1.92603e+08		Liu et al. 2023
Yr31	wPt-7026—wPt-0079	2B	195648663		Yang et al. 2013
QYr.ucw-2BS	gwm429—barc230	2B	1.98821e+08		Lowe et al. 2011
QYrhm.nwafu-2BC	IWA1981—IWB34732	2B	221929926		Yuan et al. 2018
QYr2B.2	2B_228181881	2B	228181881		Huang et al. 2024
QYrAvS.wgp-2BL	IWB51607—IWB47487	2B	2.43192e+08		Liu et al. 2020b
QYrpd.swust-2BL.1	IWB62645—IWB52560	2B	2.47624e+08		Zhou et al. 2022b
QYr.sgi-2B.1	TA1988_4550—wmc592	2B	301057668		Pretorius et al. 2017
QYrlu.cau-2BS2	Xgwm148—Xabrc167	2B	323833762		Guo et al. 2008
QYr.crc-2BS	Bobwhite_c8734_91—JD_c6368_651	2B	3.42598e+08		Rosa et al. 2019
	2B_360129171	2B	360100000		Mahmood et al. 2022
QYr.caas-2BS.1	Xgwm148—Xwmc360	2B	4.17621e+08		Bin et al. 2012
QYr.ifa-2BL	wPt-7360—wPt-733641	2B	4.23751e+08		Buerstmayr et al. 2014
	IAAV1743	2B	439225308		Shahinnia et al. 2022
	Ra_c6266_136	2B	440214889		Shahinnia et al. 2022
	S2B_458606839	2B	458606839		Sharma et al. 2025
	Xbarc160—Xbarc167	2B	4.70779e+08		Yuan et al. 2018
QYr.inra-2BL	gpw3032—gpw4043	2B	5.19481e+08		Paillard et al. 2012
	S2B_523341745	2B	523341745		Sharma et al. 2025
	Jagger_c6853_60	2B	547058598		Shahinnia et al. 2022
	RFL_Contig4718_1269	2B	553623396		Shahinnia et al. 2022
QYr.nafu-2BL	Xgpw5770—Xcfd73	2B	556617367		Zhou et al. 2015a
QYrqn.nwafu-2BL	AX-94507002—AX-94562871	2B	579355389		Zeng et al. 2019c
	951688	2B	584819195		El Messoadi et al. 2022
QYr.inra-2BL	Xgpw3032—Xcfd50a	2B	5.94033e+08		Mallard et al. 2005
	S2B_598744752	2B	598744752		Sharma et al. 2025
Yr53	Xwmc441	2B	605844353		Xu et al. 2013
	S2B_607798364	2B	607798364		Sharma et al. 2025
QYr.inra-3Bcent	Xgwm131b—Xbcd131	2B	609601922		Dedryver et al. 2009
	S2B_625334668	2B	625334668		Sharma et al. 2025
QYr.inra-2BS	Xbarc101	2B	629204633		Mallard et al. 2005
QYrdr.wgp-2BL	IWA839—IWA4294	2B	6.36836e+08		Hou et al. 2015
Start	Chr2B_660133069	2B	657533069		Soleimain and Pfrieme et al. 2026
Marker	Chr2B_660133069	2B	660133069		Soleimain and Pfrieme et al. 2026
Yr41	Xgwm410	2B	660734889		Luo et al. 2005
QYrSM155.1	AX-109583610—AX-110907562	2B	6.61108e+08		Zhou et al. 2022a
End	Chr2B_660133069	2B	662733069		Soleimain and Pfrieme et al. 2026
QYrsnb.nwafu-2BL	AX-109400835—AX-95658192	2B	691083402		Zeng et al. 2019b
Yr7	TraesCS2B03G1230600	2B	693310000		Marchal et al. 2018
	S2B_706506028	2B	706506028		Sharma et al. 2025
	S2B_710041043	2B	710041043		Sharma et al. 2025
Qyr.gaas.2B.1	AX-108837623—AX-110359903	2B	7.10421e+08		Cheng e al. 2022
QYraq.cau-2BL	Xwmc175—Xwmc332	2B	713155472		Guo et al. 2008
QYrns.orz-2BL	408290—wPt-0950	2B	714809586		Vazquez et al. 2015
QYr.caas-2BL	XwPt-8460—XwPt-3755	2B	721878624		Ren et al. 2012a
	S2B_724829085*	2B	724829085		Sharma et al. 2025
	213_765454910	2BL	765454910		Juliana et al. 2020
	28_765461540	2BL	765461540		Juliana et al. 2020
	wmc332—wmc317a	2B	7.71049e+08		Christiansen et al. 2006
QYrAvS.wgp-2BS	IWB13249—IWB11101	2B	7.7469e+08		Liu et al. 2020b
	IWB35566	2B	783200000		Mahmood et al. 2022
QYrpd.swust-2BL.2	IWB44066—IWB30421	2B	7.85682e+08		Zhou et al. 2022b
QYrpd.swust-2BL.3	IWB7605—IWB25791	2B	7.93103e+08		Zhou et al. 2022b
QYrpd.swust-2BL.4	IWB5978—IWB62759	2B	793581197		Zhou et al. 2022b
QYr.ramp-2B.4	AX-94637676	2B	1021200000		Kumar et al. 2020
QYr.hbaas-2BL	IWA586	2BL	4533000000		Shewabez et al. 2025
QYr2B.1	2B_84455477	2B	84455477-84819273		Huang et al. 2024
QYr.uaf-2B.1	IWA2344	2B		96.99	Habib et al. 2020
QYr.uaf-2B.2	IWA4097	2B		113.86	Habib et al. 2020
IWA3621	IWA2977,IWA4983,IWA4984,IWA5149,IWA6875,IWA6818	2B		114.3	Muleta et al. 2017
IWA1040	IWA8266	2B		210.2	Muleta et al. 2017
QYrSW.wgp-2B.2	IW8165	2B1.		173	Liu et al. 2020
Yr5	Yr5.KASP	2B1.			Liu et al. 2020
QYr.uaf.2BL.1	sun471–sun478	2BL1		63–65	Muhammad et al. 2020
QYr.uaf.2BL.2	wmc149	2BL2		100	Muhammad et al. 2020
Yrq1	Xgdm5—Xgwm296	2D	1.69931e+07		Cao et al. 2012
QYr.hbau-2DS	AX-109486828—AX-109403444	2D	20566935		Gebrewahid et al. 2020b
QYr.nwafu-2DS	AX-89563243—AX-111128536	2D	6.81063e+07		Liu et al. 2021a
	2D_82308875	2D	82300000		Mahmood et al. 2022
	S2D_122329962	2D	122329962		Sharma et al. 2025
QYr.caas-2DS	Xcfd51—Xgwm261	2D	366536479		Lu et al. 2009
	S2D_445703860	2D	445703860		Sharma et al. 2025
QYr.ufs-2D	Xgwm102—wPt-664520	2D	4.96797e+08		Agenbag et al. 2012
	709240	2D	498266092		El Messoadi et al. 2022
Qyr.gaas.2D	AX-109229475—AX-110833961	2D	511553145		Cheng e al. 2022
QYr.niab-2D.1	Xgwm539—EST22	2D	5.1521e+08		Powell et al. 2013
QYr.caas-2DL	XwPt-6752—Xcfd47	2D	5.50264e+08		Ren et al. 2012a
QYr.inra-2DS	Xgwm102—Xgwm539	2D	588975546		Mallard et al. 2005
	836912	2D	633878023		El Messoadi et al. 2022
QYr.niab-2D.2	wPt-7408—Xgwm301a	2D	648883779		Powell et al. 2013
Yr54	wPt-667162—wPt-667054	2D	654345940		Basnet et al. 2014
QYrSW.wgp-2D	IWA6301	2D		12	Liu et al. 2020
	2D_572256847	2DL	572256847		Juliana et al. 2020
	2D_575686517	2DL	575686517		Juliana et al. 2020
	2D 634645061	2DL	634645061		Juliana et al. 2020
	2D_635168473	2DL	635168473		Juliana et al. 2020
QYr.uaf.2DL	gwm539–gwm354	2DL		91–93	Muhammad et al. 2020
QYr.uaf.2DS	barc124	2DS		0	Muhammad et al. 2020
QYrSW.wgp-3D	IWA5816	313S		42	Liu et al. 2020
Yr76	Xwmc1—Xwmc532	3A	52		Xiang et al. 2016
QYr.cim-3AS	4536273—4009657	3A	8600000		Liu et al. 2022
QYr.ifa-3AS	wPt-0714—wPt-9634	3A	1.90435e+07		Buerstmayr et al. 2014
Yrq2	Xwmc11—Xgwm369	3A	2.13896e+07		Cao et al. 2012
QYrsv.swust-3AS	IWB7237—IWB8523	3A	26571087		Zhou et al. 2021b
QYr.dms-3A	Tdurum_contig74920_757—RAC875_c45016_79	3A	47375423		Zou et al. 2017
QYr.hbau-3AS	AX-111491666—AX-110551014	3A	5.0594e+07		Gebrewahid et al. 2020b
QYrne.vt-3A	wPt7608—wPt1681	3A	5.47619e+07		Christopher et al. 2013a
	S3A_128420383	3A	128420383		Sharma et al. 2025
	3A_130776756	3A	1.308e+08		Mahmood et al. 2022
	S3A_204766888	3A	204766888		Sharma et al. 2025
	S3A_261175449	3A	261175449		Sharma et al. 2025
	wPT-6422—wPT-7890	3A	3.01511e+08		Roseswarne et al. 2012
	S3A_306830730	3A	306830730		Sharma et al. 2025
	S3A_310982989	3A	310982989		Sharma et al. 2025
	S3A_434787689	3A	434787689		Sharma et al. 2025
	S3A_470848383	3A	470848383		Sharma et al. 2025
	S3A_499526052	3A	499526052		Sharma et al. 2025
	3A_503145562	3A	503100000		Mahmood et al. 2022
	S3A_507928475	3A	507928475		Sharma et al. 2025
	S3A_509438360	3A	509438360		Sharma et al. 2025
QYrdr.wgp-3AL	IWA6834—IWA602	3A	555997112		Hou et al. 2015
	S3A_577488099	3A	577488099		Sharma et al. 2025
	S3A_617671922	3A	617671922		Sharma et al. 2025
QYr.rcrrc.3A	2253031—3022046	3A	678800000		Tehseen et al. 2022
	3A_701489529	3A	701500000		Mahmood et al. 2022
QYr.hebau-3AL	AX-111087037—AX-110964176	3A	7.19127e+08		Gebrewahid et al. 2020a
QYrpd.swust-3AL.2	IWA95—IWB13994	3A	7.25736e+08		Zhou et al. 2022b
QYrpd.swust-3AL.1	IWB34554—IWB3508	3A	733334857		Zhou et al. 2022b
	3A_736945971	3A	736900000		Mahmood et al. 2022
QYr.hbaas-3AL	IWB70396	3AL	5028000000		Shewabez et al. 2025
QYr.uaf.3AS	gwm2–gwm32	3AS		44–47	Muhammad et al. 2020
QYr.inra-3BS	Xgwm533	3B	19451		Dedryver et al. 2009
QYr.cim-3BS	Pbc—Xgwm533	3B	19451		Yang et al. 2013
Qyrlov.nwafu-3BS	IWB57990—IWB6491	3B	432156		Wu et al. 2017
	Xgwm389—Xgwm533.2	3B	594729		Suenaga et al. 2003
QYr.spa-3B.2	wPt-740957—wPt-742222	3B	920576		Singh et al. 2014
QYr.spa-3B.1	wPt-8855—wPt-7984	3B	1.15546e+06		Singh et al. 2014
QYr.ifa-3BS	Xbarc133—Xgwm389	3B	1170006		Buerstmayr et al. 2014
Yr57	BS00062676—Xgwm389	3B	2.50651e+06		Randhawa et al. 2015
QYrhm.nwafu-3BS	IWB66970—IWB23457	3B	5801524		Yuan et al. 2018
QYr.ramp-3B.1	AX-94573417	3B	7900000		Kumar et al. 2020
QYr.rcrrc.3B.1	5971264—1685999	3B	8000000		Tehseen et al. 2022
QYrsk.wgp-3BS	IWB67768—IWA7230	3B	9040396		Liu et al. 2019
QYr.nafu-3BS	Xgwm533.2—Xgwm493	3B	9.63847e+06		Zhou et al. 2015b
QYr.lrdc-3B	RFL_Contig4531_1195	3B	10050000		Farzand et al. 2022
QYr.cim-3BS	1315407|F|0_8:G>A—1318182	3B	10750000		Liu et al. 2022
QYrblu.nwafu-3BS	AX-111487728—AX-109919508	3B	12575146		Huang et al. 2019
QYrto.swust-3BS	AX-94509749—AX-94998050	3B	1.39355e+07		Zhou et al. 2019
QYr.spa-3B	UMN10—Tdurum_contig79629_538	3B	16064877		Bokore et al. 2017
QYr.sun-3B	wPt-8238—wPt-6973	3B	1.91267e+07		Bariana et al. 2010
QYrr-3B	Xfba190—Xgwm493	3B	19257492		Chuneja et al. 2006
QYrpi.vt-3BL	gwm493—wpt11278	3B	19257492		Christopher et al. 2013b
QYrhm.nwafu-3BS	Xbarc87—IWB39254	3B	26031038		Yuan et al. 2018
QYr.cim-3BS	wPt-741331—wPt-741750	3B	27637566		Pretorius et al. 2017
	S3B_35280404	3B	35280404		Sharma et al. 2025
	S3B_35986723	3B	35986723		Sharma et al. 2025
QYr.ucw-3B.2	5202	3B	39000000		Maccaferri et al. 2015
	IWA747	3B	55500000		Mahmood et al. 2022
	3B_55514953	3B	55500000		Mahmood et al. 2022
	3B_65339336	3B	65300000		Mahmood et al. 2022
QYr.uga-3BS.3	wPt-1612—wPt-7486	3B	6.63494e+07		Hao et al. 2011
QYr.nafu-3BS	Xbarc133—Xwmc533.2	3B	1.29552e+08		Zhou et al. 2015a
QYr.uga-3BS.2	wPt-730063—wPt-9579	3B	1.34e+08		Hao et al. 2011
	wPT-2458—wPT-0036	3B	174504052		Roseswarne et al. 2012
	3B_180646490	3B	180600000		Mahmood et al. 2022
	S3B_220508469	3B	220508469		Sharma et al. 2025
QYrbr.wpg.3B.2	wPt-9432—Xgdm8	3B	2.78801e+08		Case et al. 2014
QYrcw.nwafu-3BS	AX-94437233—AX-95240191	3B	340281700		Zeng et al. 2019a
	3B_470866042	3B	470900000		Mahmood et al. 2022
QYrPI197734.wgp-3B	IWB10591—IWA6297	3B	495859740		Liu et al. 2020a
QYr.rcrrc.3B.2	5370854—4909542	3B	580100000		Tehseen et al. 2022
	S3B_646995777	3B	646995777		Sharma et al. 2025
	907150	3B	739039724		El Messoadi et al. 2022
QYr.sun-3B	wPt-7454—wPt-2698	3B	753934040		Bansal et al. 2013
Yr82	sunKASP_300	3B	757295432		Pakeerathan et al. 2019
	S3B_800750041	3B	800750041		Sharma et al. 2025
QYrex.wgp-3BL	Xgwm299—Xwgp66	3B	823055339		Lin and Chen 2009
QYr3B	3B_234312045	3B	234312045-235001173		Huang et al. 2024
IWA6843		3B		111.6	Muleta et al. 2017
QYr.hbaas-3BS	IWB12253	3BS	91000000		Shewabez et al. 2025
QYrSW.wgp-3B	IWA5106	3BS		20	Liu et al. 2020
QYr.uaf.3BS	gwm389–gwm533	3BS		1–6	Muhammad et al. 2020
Yr66	IWB47165—IWB18087	3D	934362		Catalogue of gene symbols for wheat
	3D_2620724	3D	2600000		Mahmood et al. 2022
Yr49	Xwgp7321—Xgwm161	3D	7092906		Catalogue of gene symbols for wheat
	589106	3D	18699611		El Messoadi et al. 2022
QYr.ucw-3D	gdm72—cfd62	3D	42336985		Cobo et al. 2018
QYr.cim-3DS	2261207—1143346	3D	80200000		Liu et al. 2022
QYr.cim-3DC	gwm341—barc1119	3D	2.04454e+08		Lan et al. 2017
QYrsn.nwafu-3DS	AX-109446046—AX-94498685	3D	2.73388e+08		Huang et al. 2021
QYrr-3D	Xgwm456—Xbcd134	3D	283950220		Chuneja et al. 2006
	3D_355163225	3D	355200000		Mahmood et al. 2022
QYr.cim-3D	Xgdm8—Xgdm128	3D	358452861		Yang et al. 2013
QYr.gaas-3DL	AX-111460455—AX-108798599	3D	358941129		Bai et al. 2022
	IWB26725	3D	367400000		Mahmood et al. 2022
QYrsn.nwafu-3DL	AX-110950126—AX-109582945	3D	3.97246e+08		Huang et al. 2021
	IWB1577	3D	439700000		Mahmood et al. 2022
	IWB24288	3D	447100000		Mahmood et al. 2022
QYr.hbau-3DL	AX-109333872—AX-108884636	3D	4.66938e+08		Gebrewahid et al. 2020b
	S3D_506908634	3D	506908634		Sharma et al. 2025
	3D_551073224	3D	551100000		Mahmood et al. 2022
Yr71	Xgwm114	3D	606929175		Bariana et al. 2016
	AX-94580041	3D	5672000000		Khan et al. 2024
QYr.uaf.3DL	gwm664	3DL		84	Muhammad et al. 2020
QYr.uaf.3DS.1	gwm114–gwm161	3DS1		0–3	Muhammad et al. 2020
QYr.uaf.3DS.2	gwm183–gwm384	3DS2		16–20	Muhammad et al. 2020
QYrSW.wgp-4B	IW860835	4 BS		0	Liu et al. 2020
QYrcen.nwafu-4AL	AX-94695204—AX-94996273	4A	5.70394e+06		Mu et al. 2019
QYrel.wgp-4AL	IWB56668—IWB18740	4A	9523593		Liu et al. 2019b
QYr.sgi-4A.2	wPt0538—wPt1961	4A	21917066		Prins et al. 2011
QYrst.orr-4AL	wPt-9901—wPt-0032	4A	54678477		Vazquez et al. 2012
	S4A_61065066	4A	61065066		Sharma et al. 2025
Start	Chr4A_110976029	4A	108376029		Soleimain and Pfrieme et al. 2026
Marker	Chr4A_110976029	4A	110976029		Soleimain and Pfrieme et al. 2026
End	Chr4A_110976029	4A	113576029		Soleimain and Pfrieme et al. 2026
QYrPI181410.wgp-4AS	IWB57099—IWB6643	4A	2.33256e+08		Liu et al. 2020b
	S4A_271844588	4A	271844588		Sharma et al. 2025
QYr.spa-4A	wsnp_Ex_c21197_30325539—tplb0022j01_1046	4A	300900102		Bokore et al. 2017
	S4A_311417587	4A	311417587		Sharma et al. 2025
	S4A_337252413	4A	337252413		Sharma et al. 2025
	S4A_352174561	4A	352174561		Sharma et al. 2025
QYr.sicau-4A	AX-109858991—AX-109982633	4A	370868910		Ma et al. 2019
QYr.sgi-4A.1	wPt6404—wmc313	4A	3.82685e+08		Pretorius et al. 2017
QYr.hebau-4AL	AX-109373210—AX-109366086	4A	383549631		Gebrewahid et al. 2020a
QYrid.ui-4A	Xgwm165—Xgwm495	4A	412603617		Chen et al. 2012
	4A_438964494	4A	439000000		Mahmood et al. 2022
QYr.spa-4A	BobWhite_c20163_456—BS00022052_51	4A	4.65079e+08		Bokore et al. 2017
QYr.dms-4A	wsnp_RFL_Contig25_2082245—wsnp_Ra_c33762_42584098	4A	551253925		Zou et al. 2017
	4A_659618327	4A	659600000		Mahmood et al. 2022
QYr.sgi-4A.1	Xbarc78—Xwmc219	4A	6.87825e+08		Agenbag et al. 2014
QYrsv.swust-4AL	IWB11158—IWB36731	4A	706361307		Zhou et al. 2021b
	IWB68805	4A	733600000		Mahmood et al. 2022
Yr60	Xwmc776—Xwmc313	4A	7.44724e+08		Herrera-Foessel. 2015
QYr.uaf-4A.1	IWA3361	4A		48.84	Habib et al. 2020
QYr.ucw-4A	1034	4Ac	1817000000		Maccaferri et al. 2015
QYrSW.wgp-4A. 1	1W835095	4AL		64	Liu et al. 2020
QYrSW.wgp-4A.2	IW84308	4AL		103	Liu et al. 2020
QYr.uaf.4AL	wmc776–gpw356	4AL		82–111	Muhammad et al. 2020
QYr.hebau-4BS	AX-108730259—AX-110740087	4B	5.04001e+06		Gebrewahid et al. 2020a
	4B_11905357	4B	11900000		Mahmood et al. 2022
QYr.hebau-4BS	AX-109867593—AX-111641369	4B	15027304		Zhang et al. 2019c
	S4B_68391161	4B	68391161		Sharma et al. 2025
QYrva.vt-4BL	wmc48a—wmc652	4B	101703649		Christopher et al. 2013b
QYrhm.nwafu-4B/6A	IWB8350—IWB46525	4B	199549186		Yuan et al. 2018
Yr62	Xgwm251—Xgwm192	4B	2.53411e+08		Lu et al. 2014
QYr.spa-4B	BS00056495_51—Tdurum_contig27799_114	4B	275208488		Bokore et al. 2017
QYr.spa-4B	Tdurum_contig27799_114—RAC875_c22142_333	4B	2.76662e+08		Bokore et al. 2017
Yr50	Xbarc1096—Xwmc47	4B	296604601		Liu et al. 2013
QYrPI181410.wgp-4BL	IWB80—IWB51659	4B	319193204		Liu et al. 2020b
	S4B_436289930	4B	436289930		Sharma et al. 2025
QYr.ufs-4B	Xgwm165—Xgwm495	4B	447313197		Agenbag et al. 2012
QYr.caas-4BL	Xgwm165—Xgwm149	4B	4.78192e+08		Lu et al. 2009
QYrus.vt-4BL	gwm165—gwm149	4B	4.78192e+08		Christopher et al. 2013a
	XpAGGmCTG10—Xgwm495	4B	482022777		William et al. 2006
QYrhm.nwafu-4B	IWB61846—Xgwm251	4B	4.93089e+08		Yuan et al. 2018
	S4B_526319279	4B	526319279		Sharma et al. 2025
QYr.crc-4BL	RAC875_rep_c72961_977—BS00048794_51	4B	542831591		Rosa et al. 2019
QYrsk.wgp-4BL	IWB433—IWB13720	4B	549574520		Liu et al. 2019
	S4B_560661391	4B	560661391		Sharma et al. 2025
QYr.inra-4B	gwm495—wmc47	4B	5.63009e+08		Paillard et al. 2012
	S4B_571886653	4B	571886653		Sharma et al. 2025
	AX-94684920	4B	581078314		Shahinnia et al. 2022
Yr68	IWB74301—IWB28394	4B	599612846		Catalogue of gene symbols for wheat
	IWB5827	4B	603100000		Mahmood et al. 2022
QYr.caas-4BS	Xwmc652—Xgpw4388	4B	607134800		Wang et al. 2021a
	4B_609362872	4B	609400000		Mahmood et al. 2022
QYr.nwafu-4BL.2	AX-111121224—AX-89518393	4B	627029219		Liu et al. 2021a
QYr.spa-4B	tplb0061a20_153—RAC875_rep_c119568_203	4B	6.40894e+08		Bokore et al. 2017
Qyr.gaas.4B	AX-111556599—AX-110016820	4B	6.59285e+08		Cheng e al. 2022
QYr.spa-4B	BobWhite_rep_c63332_67—Ex_c45493_761	4B	6.61103e+08		Bokore et al. 2017
QYrst.orr-4BS	wPt5265—312980	4B	664678873		Vazquez et al. 2012
Qyr.gaas.4B.1	AX-109410422—AX-110036160	4B	6.66886e+08		Cheng e al. 2022
	Xgwm6—Xgwm538	4B	680077893		Suenaga et al. 2003
	AX-94878781	4B	6453000000		Khan et al. 2024
IWA2194		4B		49.4	Muleta et al. 2017
QYr.uaf-4B.1	IWB12434	4B		74.62	Habib et al. 2020
QYr.uaf-4B.2	IWA2031	4B		98.65	Habib et al. 2020
QYr.uaf-4B.3	IWA408	4B		114.87	Habib et al. 2020
QYr.hbaas-4BL.1	IWB73717	4BL	5313000000		Shewabez et al. 2025
QYr.hbaas-4BL.2	IWB63337	4BL	5581000000		Shewabez et al. 2025
QYr.hbaas-4BL.3	IWB32927	4BL	5794000000		Shewabez et al. 2025
QYr.uaf.4BS	gwm538–gwm192	4BS		11–30	Muhammad et al. 2020
Yr28	TraesCS4D03G0006500	4D	1690000		Zhang et al. 2019a
Qyr.gaas.4D	AX-111688098—AX-110768844	4D	3754683		Cheng e al. 2022
	4D_156687029	4D	156700000		Mahmood et al. 2022
	S4D_196312261	4D	196312261		Sharma et al. 2025
Yr46	Xgwm165—Xgwm192	4D	231867435		Herrera-Foessel. 2011
QYr.ucw-4D	5375	4D	269000000		Maccaferri et al. 2015
	S4D_297199807	4D	297199807		Sharma et al. 2025
QYr.caas-4DL	Xwmc331—Xgwm165	4D	433072048		Ren et al. 2012b
	Xwmc331—Xwmc399	4D	469159094		Suenaga et al. 2003
	wPT-4572—wPT-6880	4D	4.76135e+08		Roseswarne et al. 2012
IWA5707	IWA6277	4D		25.7	Muleta et al. 2017
QYr.hbaas-4DL	IWB44356	4DL	4779000000		Shewabez et al. 2025
QYr.uaf.4DS.1	wmc617–gwm285	4DS1		0–10	Muhammad et al. 2020
QYr.uaf.4DS.2	gwm608	4DS2		31	Muhammad et al. 2020
QYrSW.wgp-5B.1	IWA5218	58L		60	Liu et al. 2020
QYrSW.wgp-5B.2	IWA4280	58L		69	Liu et al. 2020
QYrSW.wgp-5B.3	IWA3500	58L		129	Liu et al. 2020
Qyr.gaas.5A.1	AX-109019768—AX-108808620	5A	6762905		Cheng e al. 2022
QYr.gaas-5AL	AX-111523523—AX-110028503	5A	6.25824e+07		Bai et al. 2022
QYr.ifa-5A	barc117—wPt-2426	5A	87025709		Buerstmayr et al. 2014
	S5A_167153999	5A	167153999		Sharma et al. 2025
	S5A_326665354	5A	326665354		Sharma et al. 2025
	5A_383980539	5A	364000000		Mahmood et al. 2022
	S5A_392096163	5A	392096163		Sharma et al. 2025
Qyr.gaas.5A	AX-109471543—AX-110616505	5A	452268338		Cheng e al. 2022
QYr.hebau-5AL	AX-109446853—AX-111495975	5A	464317483		Gebrewahid et al. 2020a
	IWB33444	5A	481900000		Mahmood et al. 2022
QYrsv.swust-5AL.1	IWA5118—IWB60872	5A	5.12808e+08		Zhou et al. 2021b
QYr.crc-5AL	tp1b0036c11_641—BS00067816_51	5A	5.15877e+08		Rosa et al. 2019
	S5A_528446200	5A	528446200		Sharma et al. 2025
QYrPI181410.wgp-5AS	IWB10594—IWB7246	5A	5.35022e+08		Liu et al. 2020b
YrU1	TraesCS5A03G0826500	5A	549280000		Wang et al. 2020
Qyr.gaas.5A.2	AX-110169414—AX-111590180	5A	5.76168e+08		Cheng e al. 2022
QYr.hebau-5AL	AX-110909761—AX-110957925	5A	580125735		Zhang et al. 2019c
QYrsk.wgp-5AL	IWB53812—IWB1737	5A	5.83644e+08		Liu et al. 2019
	5A_590355732	5A	590400000		Mahmood et al. 2022
QYr.lrdc-5A	RFL_Contig316_572	5A	602450000		Farzand et al. 2022
	IWB28556	5A	620600000		Mahmood et al. 2022
QYr.rcrrc.5A	1141822—1087201	5A	639800000		Tehseen et al. 2022
Yr34	Xgwm410	5A	660734889		Bariana et al. 2006
QYr.caas-5AL.2	XwPt-1903—Xwmc727	5A	668261192		Ren et al. 2012a
	IWA4223	5A	670400000		Mahmood et al. 2022
QYrsv.swust-5AL.2	IWB71794—IWB71147	5A	672694493		Zhou et al. 2021b
QYr.spa-5A	CAP11_c2623_196—BS00022838_51	5A	6.795e+08		Bokore et al. 2017
QYrdr.wgp-5AL	IWA2947—IWA6988	5A	6.95103e+08		Hou et al. 2015
QYrns.orz-5AL	Awn-gwm291	5A	700486548		Vazquez et al. 2015
Yr48	Xwmc727—Xgwm291	5A	700486548		Lowe et al. 2011
	wPT-0837—wPT-5231	5A	714074181		Roseswarne et al. 2012
QYr5A	5A_553552583	5A	553552583-553816693		Huang et al. 2024
IWA2145		5A		19.7	Muleta et al. 2017
IWA1258		5A		235.1	Muleta et al. 2017
QYr.ucw-5A.2	6988	5Ad	1892000000		Maccaferri et al. 2015
QYrSW.wgp-5A	IWAI	5AL		91	Liu et al. 2020
QYr.uaf.5AL	gwm156–gwm617	5AL		73–77	Muhammad et al. 2020
	IWB27708	5B	2300000		Mahmood et al. 2022
	IWB7869	5B	2600000		Mahmood et al. 2022
QYr.uga-5B	wPt-665267—Xgdm152	5B	3.66971e+06		Hao et al. 2011
QYr.inra-5BL.2	Xgwm234—XDuPw115a	5B	8.24931e+06		Mallard et al. 2005
Yr47	Xsun180—Xgwm234	5B	8.24931e+06		Bansal et al. 2011
	IWB65690	5B	10800000		Mahmood et al. 2022
QYrel.wgp-5BS	IWB15048—IWA420	5B	1.82622e+07		Liu et al. 2019b
QYrPI181410.wgp-5BL.1	IWB34702—IWB5907	5B	2.32125e+07		Liu et al. 2020b
QYr.ufs-5B	wPt-7114—Xbarc74	5B	26629411		Agenbag et al. 2012
	IWB8592	5B	64700000		Mahmood et al. 2022
	S5B_85433288	5B	85433288		Sharma et al. 2025
QYr.ramp-5A.1	AX-95229410	5B	1.221e+08		Kumar et al. 2020
QYrPI181410.wgp-5BL.2	IWB59968—IWB20628	5B	1.78163e+08		Liu et al. 2020b
	5B_207483057	5B	207500000		Mahmood et al. 2022
QYr.cim-5BL	Xbarc109—Xbarc74	5B	234455711		Yang et al. 2013
Yr-tem-5B.2	Wmc235—wms604	5B	3.17218e+08		Feng et al. 2010
Yr-tem-5B.1	barc89—wms67	5B	401884280		Feng et al. 2010
	S5B_408312043	5B	408312043		Sharma et al. 2025
QYr.inra-5BL.1	Xgwm639a—Xgwm639c	5B	419862884		Mallard et al. 2005
QYrco.wpg-5B	Xiwa5488—Xgwm639	5B	419862884		Case et al. 2014
QYrns.orz-5BL	wPt4628—wPt-8285	5B	437619320		Vazquez et al. 2015
	5B_471381890	5B	471400000		Mahmood et al. 2022
	Xgwm499—Xbcd9	5B	480507714		Suenaga et al. 2003
QYr.caas-5BL.3	XwPt-2707—Xbarc275	5B	480792749		Ren et al. 2012a
	954980	5B	485572004		El Messoadi et al. 2022
QYr.spa-5B	Tdurum_contig12551_233—GENE-3619_1219	5B	4.90694e+08		Bokore et al. 2017
QYr.caas-5BL.1	Xwmc415—Xwmc537	5B	510984151		Lu et al. 2009
	S5B_516675208	5B	516675208		Sharma et al. 2025
QYr.YBZR-5BL	AX-111002705—AX-109337325	5B	5.2916e+08		Deng et al. 2022
QYr.AYH-5BL	AX-109337325—AX-110400764	5B	5.39153e+08		Long et al. 2021
	IWA2062	5B	542600000		Mahmood et al. 2022
QYrdr.wgp-5BL.2	IWA8391—IWA3025	5B	545536077		Hou et al. 2015
QYr.dms-5B	BobWhite_c48435_288—RAC875_c28794_361	5B	549917331		Zou et al. 2017
	583038	5B	551671288		El Messoadi et al. 2022
	IWA3089	5B	580400000		Mahmood et al. 2022
	5B_580647907	5B	580600000		Mahmood et al. 2022
	5B_580647907	5B	580600000		Mahmood et al. 2022
QYr.nwafu-5BL.1	AX-111152749—AX-110508006	5B	594296208		Liu et al. 2021a
QYr.caas-5BL.2	Xbarc142—Xgwm604	5B	603785584		Lu et al. 2009
QYrdr.wgp-5BL.1	IWA2093—IWA2365	5B	622614428		Hou et al. 2015
QYr.sdau-5B	/	5B	637550000		Pang et al. 2022
QYr.usw-5B	RAC875_c38873_1118—wsnp_Ku_c4427_8029592	5B	6.37845e+08		Lin et al. 2018
QYr.spa-5B	Xbarc-142—tPt-3144	5B	6.3891e+08		Singh et al. 2014
QYr.sun-5B	barc0142—wPt-0837	5B	6.61708e+08		Bansal et al. 2013
QYr.nwafu-5BL.2	AX-109827342—AX-94987192	5B	6.63412e+08		Liu et al. 2021a
QYr.spa-5B	BS00088733_51—BS00022139_51	5B	6.71182e+08		Bokore et al. 2017
QYr.cim-5BL	barc59—wPt-3922	5B	6.86301e+08		Calvo-Salazar et al. 2015
Qyr.gaas.5B	AX-110689592—AX-109479506	5B	6.89255e+08		Cheng e al. 2022
	IWB65055	5B	692600000		Mahmood et al. 2022
QYr.uaf-5B.1	IWB5781	5B		56.6	Habib et al. 2020
IWA1755	IWA6627	5B		130.4	Muleta et al. 2017
IWA7815	IWA2335,IWA4280,IWA5112	5B		167.8	Muleta et al. 2017
QYr.uaf.5BS	gwm213–gwm639	5BS		68–77	Muhammad et al. 2020
Yr70	Xgwm190	5D	8864771		Bansal et al. 2017
	S5D_90288936	5D	90288936		Sharma et al. 2025
	S5D_93017359	5D	93017359		Sharma et al. 2025
	IWB14489	5D	133500000		Mahmood et al. 2022
	S5D_282820006	5D	282820006		Sharma et al. 2025
	IWB9144	5D	487600000		Mahmood et al. 2022
	IWB35933	5D	521400000		Mahmood et al. 2022
QYrdr.wgp-5DL	IWA701—IWA8404	5D	554213940		Hou et al. 2015
QYrbr.wpg-5D	Xwmc765—Xbarc144	5D	5.55406e+08		Case et al. 2014
QYr.uaf.5DL	gwm292–gwm212	5DL		62–64	Muhammad et al. 2020
QYr.uaf.5DS	wmc233–gwm190	5DS		0–9	Muhammad et al. 2020
QYr.uga-6AS	wPt-671561—wPt-7840	6A	2468905		Hao et al. 2011
Yr81	gwm459	6A	8.08962e+06		Gessese et al. 2019
QYrex.wgp-6AS	Xgwm334—Xwgp56	6A	10563991		Lin and Chen 2009
QYrel.wgp-6AS	IWA705—IWB13777	6A	1.7204e+07		Liu et al. 2019b
Yrq3	Xgwm334—Xbarc3	6A	19038092		Cao et al. 2012
	wPT-2573—wPT-0959	6A	24006123		Roseswarne et al. 2012
QYr. sicau-6AS	AX-108904013—AX-89321181	6A	35796634		Wang et al. 2022a
	S6A_92638652	6A	92638652		Sharma et al. 2025
QYr.sicau-6A	AX-94548199—AX-111101235	6A	93178809		Ma et al. 2019
QYr.cim-6AL	wPt-743476—wPt-744881	6A	102383389		Pretorius et al. 2017
	S6A_110832428	6A	110832428		Sharma et al. 2025
	XpAAGmCGA4—Xgwm427	6A	142000000		William et al. 2006
	S6A_257790349	6A	257790349		Sharma et al. 2025
	IWB30735	6A	297700000		Mahmood et al. 2022
YrP10090	AX-111103596—AX-110585473	6A	3.77015e+08		Liu et al. 2021b
	IWB66163	6A	415900000		Mahmood et al. 2022
	S6A_435521395	6A	435521395		Sharma et al. 2025
QYrpl.orr-6AL	wPt-1642—378849	6A	473189200		Vazquez et al. 2012
	S6A_498220952	6A	498220952		Sharma et al. 2025
	S6A_502636146	6A	502636146		Sharma et al. 2025
QYr.YBZR-6AL	AX-109842268—AX-109829293	6A	5.14108e+08		Deng et al. 2022
	S6A_518030624	6A	518030624		Sharma et al. 2025
	Xwmc201—Xgwm570	6A	5.33026e+08		Yuan et al. 2018
	IWB40151	6A	546600000		Mahmood et al. 2022
QYren.orz-6AL	wPt-4229—wPt-8124	6A	5.53555e+08		Vazquez et al. 2015
	6A_595332866	6A	595300000		Mahmood et al. 2022
QYr.ufs-6A	wpt5550—psp3152	6A	608111381		Prins et al. 2011
	Tdurum_contig29607_413	6A	609380034		Shahinnia et al. 2022
	Jagger_c1423_102	6A	611326235		Shahinnia et al. 2022
	GENE-4167_145	6A	611328899		Shahinnia et al. 2022
QYr.nwafu-6AL (YrJ44)	AX-109373479—AX-109563479	6A	6.12198e+08		Liu et al. 2023
Qyr.gaas.6A	AX-109558600—AX-109542604	6A	6.12374e+08		Cheng e al. 2022
QYr.uaf-6A.1	IWA8028	6A		77.14	Habib et al. 2020
QYr.uaf-6A.2	IWA3463	6A		83.04	Habib et al. 2020
QYr.uaf-6A.3	IWB25252	6A		95.87	Habib et al. 2020
IWA2129		6A		212.2	Muleta et al. 2017
QYr.uaf.6AS	gwm494–wmc182	6AS		25–29	Muhammad et al. 2020
	Xgwm58—XpAGGmCAA1	6B	30708		William et al. 2006
	IWB37028	6B	4400000		Mahmood et al. 2022
QYrqn.nwafu-6BS	AX-95235011—AX-95188301	6B	18469033		Zeng et al. 2019c
	6B_22858086	6B	22900000		Mahmood et al. 2022
Yr35	Xcfd1	6B	25986503		Marais et al. 2005
	6B_31867138	6B	31900000		Mahmood et al. 2022
QYr.caas-6BS.3	Xwmc487—Xcfd13	6B	3.93389e+07		Ren et al. 2012b
Start	Chr6B_51649618	6B	49049618		Soleimain and Pfrieme et al. 2026
Marker	Chr6B_51649618	6B	51649618		Soleimain and Pfrieme et al. 2026
Start	Chr6B_54841657	6B	52241657		Soleimain and Pfrieme et al. 2026
End	Chr6B_51649618	6B	54249618		Soleimain and Pfrieme et al. 2026
Marker	Chr6B_54841657	6B	54841657		Soleimain and Pfrieme et al. 2026
End	Chr6B_54841657	6B	57441657		Soleimain and Pfrieme et al. 2026
QYr. sicau-6BS	AX-108936780—AX-109858727	6B	8.26906e+07		Wang et al. 2022a
QYr.caas-6BS.2	Xwmc104—XwPt-0259	6B	86586925		Ren et al. 2012a
QYrsk.wgp-6B	IWB41786—IWB56561	6B	1.0292e+08		Liu et al. 2019
QYr.cim-6BS	1128426|F|0_22:C>T—1109468|F|0_15:G>A	6B	116500000		Liu et al. 2022
QYrsn.nwafu-6BS	AX-108908139—AX-109914013	6B	1.21232e+08		Huang et al. 2021
Qyr.gaas.6B	AX-109408478—AX-110409180	6B	123783725		Cheng e al. 2022
QYr.spa-6B	wsnp_Ex_c12577_20022294—IACX11060	6B	1.39325e+08		Bokore et al. 2017
QYrCW357-6BS	AX-109914318	6B	149389224		Huang et al. 2022
Yr78	IWA7257—Xwmc737	6B	160375723		Dong et al. 2017
	S6B_223467058	6B	223467058		Sharma et al. 2025
	6B_231490683	6B	231500000		Mahmood et al. 2022
Start	Chr6B_243663920	6B	241063920		Soleimain and Pfrieme et al. 2026
Marker	Chr6B_243663920	6B	243663920		Soleimain and Pfrieme et al. 2026
End	Chr6B_243663920	6B	246263920		Soleimain and Pfrieme et al. 2026
	gwm518—wmc341	6B	3.06866e+08		Christiansen et al. 2006
	Xwmc333.1—Xwmc398	6B	3.34485e+08		Suenaga et al. 2003
QYrdr.wgp-6BL.1	IWA3298—IWA6436	6B	3.47474e+08		Hou et al. 2015
QYrpi.vt-6BL	wpt7935—gwm88	6B	3.51619e+08		Christopher et al. 2013b
QYr.caas-6BS.1	Xwmc487—Xgwm768	6B	3.55057e+08		Bin et al. 2012
	6B_361461100	6B	361500000		Mahmood et al. 2022
QYrpd.swust-6BL	IWB41242—IWB21972	6B	3.72595e+08		Zhou et al. 2022b
QYrst.wgp.6BS.2	Xbarc101—Xbarc136	6B	393328156		Santra et al. 2008
	6B_419133836	6B	419100000		Mahmood et al. 2022
QYr.nwafu-6BL	IWB71602—IWB55937	6B	4.63512e+08		Wu et al. 2018
QYr.inra-6B	Xcdo270—Xgwm193	6B	465876035		Dedryver et al. 2009
QYr.sicau-6B	KASP-TXK-10—KASP-TXK-6	6B	525015000		Hou et al. 2023
QYr.sdau-6B	/	6B	549550000		Pang et al. 2022
QYr.nwafu-6BL.2	AX-110913630—AX-111486170	6B	608293662		Zeng et al. 2019b
QYr.nwafu-6BL.2	AX-111486170—AX-110396162	6B	614841705		Zeng et al. 2019b
	6B_618067851	6B	618100000		Mahmood et al. 2022
QYrdr.wgp-6BL.2	IWA4773—IWA3899	6B	6.27078e+08		Hou et al. 2015
QYrst.wgp.6BS.1	Xgwm132—Xgwm705	6B	7.25521e+08		Santra et al. 2008
QYr.ucw-6B	7257	6B	1123000000		Maccaferri et al. 2015
QYr.ramp-6A.5	AX-94926681	6B	2178000000		Kumar et al. 2020
QYr.uaf-6B.1	IWB7615	6B		64.82	Habib et al. 2020
QYr.uaf.6BS	gwm518–gwm133	6BS		27–37	Muhammad et al. 2020
QYr.hebau-6DS	AX-109915375—AX-95175830	6D	6217671		Zhang et al. 2019c
	S6D_74284236	6D	74284236		Sharma et al. 2025
QYr6D	6D_102115483	6D	102115483		Huang et al. 2024
Yr77	Xbarc54—Xcfd188	6D	1.54734e+08		Catalogue of gene symbols for wheat
QYr.ufs-6D	Xgwm325—Xbarc175	6D	2.67303e+08		Agenbag et al. 2012
	589104	6D	317411424		El Messoadi et al. 2022
QYrpd.swust-6DL	IWB71500—IWA5986	6D	3.68628e+08		Zhou et al. 2022b
	6D_436810635	6D	436800000		Mahmood et al. 2022
QYr.hebau-6DL	AX-108848475—AX-109273869	6D	4.89983e+08		Gebrewahid et al. 2020a
QYr.ucw-6D	167	6D	732000000		Maccaferri et al. 2015
IWA167	IWA2802,IWA3624	6D		16.8	Muleta et al. 2017
QYr.uaf-6D.1	IWB12259	6D		155.1	Habib et al. 2020
QYr.uaf.6DL	gwm325	6DL		53	Muhammad et al. 2020
QYrSW.wgp-6D	IWA76I6	6DL		90	Liu et al. 2020
QYr.hbaas-6DS	IWB60233	6DS	60000000		Shewabez et al. 2025
QYrpd.swust-7AS	IWB11337—IWB72402	7A	20476461		Zhou et al. 2022b
QYr.sgi-7A.2	gwm332—wPt3226	7A	25357894		Prins et al. 2011
	S7A_43649084	7A	43649084		Sharma et al. 2025
	IWB74161	7A	47000000		Mahmood et al. 2022
	743246	7A	79595419		El Messoadi et al. 2022
QYrSM155.2	AX-89768766—AX-86173526	7A	86964643		Zhou et al. 2022a
QYr.caas-7AS	Xbarc127—Xbarc174	7A	8.95884e+07		Ren et al. 2012b
	939658	7A	110072483		El Messoadi et al. 2022
	196716	7A	207901907		El Messoadi et al. 2022
	7A_234640959	7A	234600000		Mahmood et al. 2022
	S7A_260372780	7A	260372780		Sharma et al. 2025
	S7A_278687032	7A	278687032		Sharma et al. 2025
	S7A_329846886	7A	329846886		Sharma et al. 2025
	S7A_339701189	7A	339701189		Sharma et al. 2025
QYr.sgi-7A.1	wPt3226—wPt8302	7A	355687381		Prins et al. 2011
	wPT-2260—wPT-2501	7A	3.83328e+08		Roseswarne et al. 2012
	S7A_441278018	7A	441278018		Sharma et al. 2025
Yr75	Xcfa2016—IWB36240	7A	445780643		Catalogue of gene symbols for wheat
	wPT-4172—wPT-8149	7A	4.52429e+08		Roseswarne et al. 2012
	S7A_464464915	7A	464464915		Sharma et al. 2025
	S7A_501355562	7A	501355562		Sharma et al. 2025
	IWB21762	7A	506100000		Mahmood et al. 2022
	BS00093016_51	7A	515199467		Shahinnia et al. 2022
	7A_529833812	7A	5.298e+08		Mahmood et al. 2022
	S7A_548774801	7A	548774801		Sharma et al. 2025
	S7A_556685233	7A	556685233		Sharma et al. 2025
	7A_588284942	7A	588300000		Mahmood et al. 2022
QYrpd.swust-7AL	IWB796—IWB14178	7A	658447318		Zhou et al. 2022b
	7A_675526339	7A	675500000		Mahmood et al. 2022
	7A_676996750	7A	677000000		Mahmood et al. 2022
	7A_696929784	7A	696900000		Mahmood et al. 2022
	732536	7A	713758479		El Messoadi et al. 2022
QYr7A.1	7A_54230600	7A	54230600-54380017		Huang et al. 2024
QYr7A.2	7A_706958946	7A	706958946-709631708		Huang et al. 2024
IWA7306		7A		2.9	Muleta et al. 2017
IWA1845	IWA2513	7A		42.5	Muleta et al. 2017
QYrSW.wgp-7A.1	IW858488	7A		91	Liu et al. 2020
QYrSW.wgp-7A.2	IWA 4173	7AL		219	Liu et al. 2020
Yr52	Xwgp5258—Xbarc182	7B	617		Ren et al. 2012c
Yr63	IWB33120—IWB52844	7B	1.06504e+06		Catalogue of gene symbols for wheat
	S7B_49808365	7B	49808365		Sharma et al. 2025
	S7B_55209301	7B	55209301		Sharma et al. 2025
	IWB26214	7B	59600000		Mahmood et al. 2022
QYr.nwafu-7BL.2	AX-111551132—AX-109421983	7B	8.82822e+07		Liu et al. 2021a
	S7B_206209604	7B	206209604		Sharma et al. 2025
Yr79	Xbarc72—Xwmc335	7B	2.37471e+08		Feng et al. 2018
	Xgwm573—Xgwm333	7B	2.96289e+08		Suenaga et al. 2003
QYr.spa-7B.1	wPt-3723—wPt-1826	7B	298352071		Singh et al. 2014
QYrst.orr-7BS	wPt-7653—wPt-4025	7B	3.42096e+08		Vazquez et al. 2012
QYrel.wgp-7BL	IWB10779—IWB73755	7B	429698893		Liu et al. 2019b
	S7B_461525341	7B	461525341		Sharma et al. 2025
QYr.nwafu-7BL.1	AX-110498108—AX-111236639	7B	4.87245e+08		Liu et al. 2021a
	wPT-3190—wPT-1475	7B	506782940		Roseswarne et al. 2012
QYr.caas-7BL.1	XwPt-8106—Xbarc176	7B	561658718		Ren et al. 2012a
	IWA5939	7B	582300000		Mahmood et al. 2022
QYr.hebau-7BL	Xcfa2040—Xwmc273	7B	624580541		Zhang et al. 2019c
QYr.niab-7B	wPt-4057—wPt-1708	7B	6.47996e+08		Powell et al. 2013
QYr.cim-7BL	wPt-9925—wPt-0194	7B	657161482		Calvo-Salazar et al. 2015
Yr67	IWB62475—IWB71995	7B	677492155		Catalogue of gene symbols for wheat
QYr.hebau-7BL	cfa2040—gwm344	7B	6.79244e+08		Yan et al. 2021
Yrq4	Xcfa2040—Xbarc32	7B	6.79387e+08		Cao et al. 2012
	AX-95154562	7B	686650881		Shahinnia et al. 2022
	IWB13912	7B	692600000		Mahmood et al. 2022
QYrblu.nwafu-7BL	AX-108818685—AX-111703868	7B	705460863		Huang et al. 2019
QYr.spa-7B.2	wPt-4300—wPt-0482	7B	7.05503e+08		Singh et al. 2014
	IWB48256	7B	711500000		Mahmood et al. 2022
QYrcen.nwafu-7BL	AX-94556751—AX-110366788	7B	7.17326e+08		Mu et al. 2019
QYr. sicau-7BL	AX-108952798—AX-110988227	7B	718169322		Wang et al. 2022a
QYr.caas-7BL.2	Xgwm577—XwPt-4300	7B	718276364		Ren et al. 2012a
QYr.usw-7B	BS00003929—BS00075300_51	7B	7.20739e+08		Lin et al. 2018
QYr.hebau-7BL	wms577—barc1073	7B	7.27269e+08		Gebrewahid et al. 2020a
	IWB12163	7B	727500000		Mahmood et al. 2022
QYr.cim-7BL	1269410|F|0–8:G>A—7353602|F|0–9:A>G	7B	7.2935e+08		Zhang et al. 2022
Qyr.gaas.7B	AX-109352027—AX-109988869	7B	744741981		Cheng e al. 2022
	7B_746448232	7B	746400000		Mahmood et al. 2022
QYr.hbau-7BL	AX-108959083—Lr68	7B	752604354		Gebrewahid et al. 2020b
	AX-94883961	7B	7170000000		Khan et al. 2024
IWA312	IWA8300	7B		76.1	Muleta et al. 2017
QYr.uaf-7B.1	IWA6857	7B		76.31	Habib et al. 2020
QYr.uaf-7B.2	IWB10895	7B		103.21	Habib et al. 2020
IWA3415	IWA3416	7B		164.9	Muleta et al. 2017
IWA32270		7B		246.5	Muleta et al. 2017
QY.rhbaas-7BL	IWB64121	7BL	7043000000		Shewabez et al. 2025
QYr.uaf.7BL.1	gwm43–gwm333	7BL1		58–65	Muhammad et al. 2020
QYr.uaf.7BL.2	mag1714–mag1811	7BL2		170–174	Muhammad et al. 2020
QYrus.vt-7D	wPt745008—wPt744656	7D	9.50333e+06		Christopher et al. 2013a
	IWB42068	7D	11400000		Mahmood et al. 2022
	S7D_13114223	7D	13114223		Sharma et al. 2025
	Xgwm885.1—Xgwm130	7D	17700882		Suenaga et al. 2003
Lr34/Yr18	barc352—gwm111	7D	2.79609e+07		Prins et al. 2011
	IWB74163	7D	44500000		Mahmood et al. 2022
QYr.YBZR-7DS	AX-109857040—AX-109438291	7D	49246943		Deng et al. 2022
QYr.hebau-7DS	csLv34—barc92	7D	5.37807e+07		Yan et al. 2021
QYr.caas-7DS	csLV34—Xgwm295	7D	5.41233e+07		Lu et al. 2009
QYr.spa-7D	SNP12—RAC875_c57622_77	7D	54850645		Bokore et al. 2017
QYr.AYH-7DS	AX-109750388—AX-110052753	7D	5.49691e+07		Long et al. 2021
QYr.sgi-7D	Xgwm295—Ltn	7D	55216879		Ramburan et al. 2004
QYr.GX-7DS	AX-110502471—AX-109303704	7D	5.53443e+07		Wang et al. 2021b
	IWB59266	7D	58700000		Mahmood et al. 2022
QYr.spa-7D	BobWhite_c40479_283—SNP12	7D	59988260		Bokore et al. 2017
	7D_96173227	7D	96200000		Mahmood et al. 2022
QYr.rcrrc.7D	1276810—1276810	7D	1.0455e+08		Tehseen et al. 2022
	S7D_119510231	7D	119510231		Sharma et al. 2025
	S7D_213389169	7D	213389169		Sharma et al. 2025
	S7D_279512503	7D	279512503		Sharma et al. 2025
Yr33	Xwmc437—Xwmc111	7D	334843788		Zahravi et al. 2003
	AX-94720261	7D	414283385		Shahinnia et al. 2022
	S7D_449212105	7D	449212105		Sharma et al. 2025
Qyr.nwafu-7DL	AX-110967909—AX-108909298	7D	4.53277e+08		Liu et al. 2023
QYrpd.swust-7DL	IWB13547—IWB14996	7D	455096871		Zhou et al. 2022b
	S7D_518590833	7D	518590833		Sharma et al. 2025
QYrsk.wgp-7DL	IWB7447 —IWB63887	7D	567247825		Liu et al. 2019
QYr.hebau-7DL	AX-110938697—AX-111591751	7D	5.96283e+08		Gebrewahid et al. 2020a
QYrmx.nwafu-7DS	IWB69295—IWB17584	7D	635656173		Yuan et al. 2018
QYrSW.wgp-7D	IW810503	7Ds		3	Liu et al. 2020
QYr.uaf.7DS	cslv34–gwm295	7DS		75–77	Muhammad et al. 2020
Yr18	wMAS00000 3	7DS			Liu et al. 2020
Yr17	Yr15-R8	IBS			Liu et al. 2020
QYrSW.wgp-1D	IW86797	ID			Liu et al. 2020
	1D_9038601	IDS	9038601		Juliana et al. 2020
Refrences:
Agenbag et al. 2012	Agenbag GM, Pretorius ZA, Boyd LA, Bender CM, Prins R (2012) Identification of adult plant resistance to stripe rust in the wheat cultivar Cappelle-Desprez. Theor Appl Genet 125:109–120. https://doi.org/10.1007/s00122-012-1819-5
Agenbag et al. 2014	Agenbag GM, Pretorius ZA, Boyd LA, Bender CM, MacCormack R, Prins R (2014) High-resolution mapping and new marker development for adult plant stripe rust resistance QTL in the wheat cultivar Kariega. Mol Breeding 34:2005–2020. https://doi.org/10.1007/s11032-014-0158-4
Bai et al. 2022	Bai B, Li Z, Wang H, Du X, Wu L, Du J, Lan C (2022) Genetic analysis of adult plant resistance to stripe rust in common wheat cultivar “Pascal.” Front Plant Sci 13:918437. https://doi.org/10.3389/fpls.2022.918437
Bansal et al. 2011	Bansal UK, Forrest KL, Hayden MJ, Miah H, Singh D, Bariana HS (2011) Characterisation of a new stripe rust resistance gene Yr47 and its genetic association with the leaf rust resistance gene Lr52. Theor Appl Genet 122:1461–1466. https://doi.org/10.1007/s00122-011-1545-4
Bansal et al. 2017	Bansal M, Kaur S, Dhaliwal HS, Bains NS, Bariana HS, Chhuneja P, Bansal UK (2017) Mapping of Aegilops umbellulata -derived leaf rust and stripe rust resistance loci in wheat. Plant Pathol 66:38–44. https://doi.org/10.1111/ppa.12549
Bariana et al. 2006	Bariana HS, Parry N, Barclay IR, Loughman R, McLean RJ, Shankar M, Wilson RE, Willey NJ, Francki M (2006) Identification and characterization of stripe rust resistance gene Yr34 in common wheat. Theor Appl Genet 112:1143–1148. https://doi.org/10.1007/s00122-006-0216-3
Bariana et al. 2010	Bariana HS, Bansal UK, Schmidt A, Lehmensiek A, Kaur J, Miah H, Howes N, McIntyre CL (2010) Molecular mapping of adult plant stripe rust resistance in wheat and identification of pyramided QTL genotypes. Euphytica 176:251–260. https://doi.org/10.1007/s10681-010-0240-x
Bariana et al. 2016	Bariana H, Forrest K, Qureshi N, Miah H, Hayden M, Bansal U (2016) Adult plant stripe rust resistance gene Yr71 maps close to Lr24 in chromosome 3D of common wheat. Mol Breeding 36:98. https://doi.org/10.1007/s11032-016-0528-1
Basnet et al. 2014	Basnet BR, Singh RP, Ibrahim AMH, Herrera-Foessel SA, Huerta-Espino J, Lan C, Rudd JC (2014) Characterization of Yr54 and other genes associated with adult plant resistance to yellow rust and leaf rust in common wheat Quaiu 3. Mol Breeding 33:385–399. https://doi.org/10.1007/s11032-013-9957-2
Bokore et al. 2017	Bokore FE, Cuthbert RD, Knox RE, Randhawa HS, Hiebert CW, DePauw RM, Singh AK, Singh A, Sharpe AG, N’Diaye A, Pozniak CJ, McCartney C, Ruan Y, Berraies S, Meyer B, Munro C, Hay A, Ammar K, Huerta-Espino J, et al (2017) Quantitative trait loci for resistance to stripe rust of wheat revealed using global field nurseries and opportunities for stacking resistance genes. Theor Appl Genet 130:2617–2635…
Buerstmayr et al. 2014	Buerstmayr M, Matiasch L, Mascher F, Vida G, Ittu M, Robert O, Holdgate S, Flath K, Neumayer A, Buerstmayr H (2014) Mapping of quantitative adult plant field resistance to leaf rust and stripe rust in two European winter wheat populations reveals co-location of three QTL conferring resistance to both rust pathogens. Theor Appl Genet 127:2011–2028. https://doi.org/10.1007/s00122-014-2357-0
Calvo-Salazar et al. 2015	Calvo-Salazar V, Singh RP, Huerta-Espino J, Cruz-Izquierdo S, Lobato-Ortiz R, Sandoval-Islas S, Vargas-Hernández M, German S, Silva P, Basnet BR, Lan CX, Herrera-Foessel SA (2015) Genetic analysis of resistance to leaf rust and yellow rust in spring wheat cultivar Kenya Kongoni. Plant Dis 99:1153–1160. https://doi.org/10.1094/PDIS-07-14-0718-RE
Cao et al. 2012	Cao X, Zhou J, Gong X, Zhao G, Jia J, Qi X (2012) Identification and validation of a major quantitative trait locus for slow-rusting resistance to stripe rust in Wheat. J Integr Plant Biol 54:330–344. https://doi.org/10.1111/j.1744-7909.2012.01111.x
Carter et al. 2009	Carter AH, Chen XM, Garland-Campbell K, Kidwell KK (2009) Identifying QTL for high-temperature adult-plant resistance to stripe rust (Puccinia striiformis f. sp. tritici) in the spring wheat (Triticum aestivum L.) cultivar ‘Louise.’ Theor Appl Genet 119:1119–1128. https://doi.org/10.1007/s00122-009-1114-2
Case et al. 2014	Case AJ, Naruoka Y, Chen X, Garland-Campbell KA, Zemetra RS, Carter AH (2014) Mapping stripe rust resistance in a Brundage X Coda winter wheat recombinant inbred line population. PLoS One 9:e91758. https://doi.org/10.1371/journal.pone.0091758
Chen et al. 2012	Chen J, Chu C, Souza EJ, Guttieri MJ, Chen X, Xu S, Hole D, Zemetra R (2012) Genome-wide identification of QTL conferring high-temperature adult-plant (HTAP) resistance to stripe rust (Puccinia striiformis f. sp. tritici) in wheat. Mol Breeding 29:791–800. https://doi.org/10.1007/s11032-011-9590-x
Cheng e al. 2022	Cheng B, Gao X, Cao N, Ding Y, Chen T, Zhou Q, Gao Y, Xin Z, Zhang L (2022) QTL mapping for adult plant resistance to wheat stripe rust in M96-5 × Guixie 3 wheat population. J Appl Genet 63:265–279. https://doi.org/10.1007/s13353-022-00686-z
Cheng et al. 2014	Cheng P, Xu LS, Wang MN, See DR, Chen XM (2014) Molecular mapping of genes Yr64 and Yr65 for stripe rust resistance in hexaploid derivatives of durum wheat accessions PI 331260 and PI 480016. Theor Appl Genet 127:2267–2277. https://doi.org/10.1007/s00122-014-2378-8
Christiansen et al. 2006	Christiansen MJ, Feenstra B, Skovgaard IM, Andersen SB (2006) Genetic analysis of resistance to yellow rust in hexaploid wheat using a mixture model for multiple crosses. Theor Appl Genet 112:581–591. https://doi.org/10.1007/s00122-005-0128-7
Christopher et al. 2013a	Christopher MD, Liu S, Hall MD, Marshall DS, Fountain MO, Johnson JW, Milus EA, Garland-Campbell KA, Chen X, Griffey CA (2013a) Identification and mapping of adult-plant stripe rust resistance in soft red winter wheat cultivar ‘USG 3555.’ Plant Breed 132:53–60. https://doi.org/10.1111/pbr.12015
Christopher et al. 2013b	Christopher MD, Liu S, Hall MD, Marshall DS, Fountain MO, Johnson JW, Milus EA, Garland‐Campbell KA, Chen X, Griffey CA (2013b) Identification and mapping of adult plant stripe rust resistance in soft red winter wheat VA00W‐38. Crop Sci 53:871–879. https://doi.org/10.2135/cropsci2012.02.0086
Cobo et al. 2018	Cobo N, Pflüger L, Chen X, Dubcovsky J (2018) Mapping QTL for resistance to new virulent races of wheat stripe rust from two Argentinean wheat cultivars. Crop Sci 58:2470–2483. https://doi.org/10.2135/cropsci2018.04.0286
Dedryver et al. 2009	Dedryver F, Paillard S, Mallard S, Robert O, Trottet M, Nègre S, Verplancke G, Jahier J (2009) Characterization of genetic components involved in durable resistance to stripe rust in the bread wheat ‘Renan.’ Phytopathology® 99:968–973. https://doi.org/10.1094/PHYTO-99-8-0968
Deng et al. 2022	Deng M, Long L, Cheng Y, Yao F, Guan F, Wang Y, Li H, Pu Z, Li W, Jiang Q, Wei Y, Ma J, Kang H, Qi P, Wang J, Zheng Y, Jiang Y, Chen G (2022) Mapping a stable adult-plant stripe rust resistance QTL on chromosome 6AL in Chinese wheat landrace Yibinzhuermai. Crop J 10:1111–1119. https://doi.org/10.1016/j.cj.2021.10.011
Dong et al. 2017	Dong Z, Hegarty JM, Zhang J, Zhang W, Chao S, Chen X, Zhou Y, Dubcovsky J (2017) Validation and characterization of a QTL for adult plant resistance to stripe rust on wheat chromosome arm 6BS (Yr78). Theor Appl Genet 130:2127–2137. https://doi.org/10.1007/s00122-017-2946-9
El Messoadi et al. 2022	El Messoadi, K., El Hanafi, S., Gataa, Z. E., Kehel, Z., Bouhouch, Y., & Tadesse, W. (2022). Genome wide association study for stripe rust resistance in spring bread wheat (Triticum aestivum L.). Journal of Plant Pathology, 104(3), 1049-1059.
Eriksen et al. 2004	Eriksen L, Afshari F, Christiansen MJ, McIntosh RA, Jahoor A, Wellings CR (2004) Yr32 for resistance to stripe (yellow) rust present in the wheat cultivar Carstens V. Theor Appl Genet 108:576–576. https://doi.org/10.1007/s00122-003-1573-9
Farzand et al. 2022	Farzand M, Dhariwal R, Hiebert CW, Spaner D, Randhawa HS (2022) QTL mapping for adult plant field resistance to stripe rust in the AAC Cameron/P2711 spring wheat population. Crop Sci 62:1088–1106. https://doi.org/10.1002/csc2.20741
Feng et al. 2018	Feng J, Wang M, See DR, Chao S, Zheng Y, Chen X (2018) Characterization of novel gene Yr79 and four additional quantitative trait loci for all-stage and high-temperature adult-plant resistance to stripe rust in spring wheat PI 182103. Phytopathology® 108:737–747. https://doi.org/10.1094/PHYTO-11-17-0375-R
Feng et al. 2023	Feng J, Yao F, Wang M, See DR, Chen X (2023) Molecular mapping of Yr85 and comparison with other genes for resistance to stripe rust on wheat chromosome 1B. Plant Dis. https://doi.org/10.1094/PDIS-11-22-2600-RE
Gebrewahid et al. 2020a	Gebrewahid TW, Zhang P, Zhou Y, Yan X, Xia X, He Z, Liu D, Li Z (2020a) QTL mapping of adult plant resistance to stripe rust and leaf rust in a Fuyu 3/Zhengzhou 5389 wheat population. Crop J 8:655–665. https://doi.org/10.1016/j.cj.2019.09.013
Gebrewahid et al. 2020b	Gebrewahid TW, Zhou Y, Zhang P, Ren Y, Gao P, Xia X, He Z, Li Z, Liu D (2020b) Mapping of stripe rust and leaf rust resistance quantitative trait loci in the Chinese spring wheat line Mianyang351-15. Phytopathology® 110:1074–1081. https://doi.org/10.1094/PHYTO-08-19-0316-R
Gessese et al. 2019	Gessese M, Bariana H, Wong D, Hayden M, Bansal U (2019) Molecular mapping of stripe rust resistance gene Yr81 in a common wheat landrace Aus27430. Plant Dis 103:1166–1171. https://doi.org/10.1094/PDIS-06-18-1055-RE
Guo et al. 2008	Guo Q, Zhang ZJ, Xu YB, Li GH, Feng J, Zhou Y (2008) Quantitative trait loci for high-temperature adult-plant and slow-rusting resistance to Puccinia striiformis f. sp. tritici in wheat cultivars. Phytopathology® 98:803–809. https://doi.org/10.1094/PHYTO-98-7-0803
Habib et al. 2020	Habib, M., Awan, F. S., Sadia, B., & Zia, M. A. (2020). Genome-wide association mapping for stripe rust resistance in Pakistani spring wheat genotypes. Plants, 9(9), 1056.
Hao et al. 2011	Hao Y, Chen Z, Wang Y, Bland D, Buck J, Brown-Guedira G, Johnson J (2011) Characterization of a major QTL for adult plant resistance to stripe rust in US soft red winter wheat. Theor Appl Genet 123:1401–1411. https://doi.org/10.1007/s00122-011-1675-8
Herrera-Foessel. 2011	Herrera-Foessel SA, Lagudah ES, Huerta-Espino J, Hayden MJ, Bariana HS, Singh D, Singh RP (2011) New slow-rusting leaf rust and stripe rust resistance genes Lr67 and Yr46 in wheat are pleiotropic or closely linked. Theor Appl Genet 122:239–249. https://doi.org/10.1007/s00122-010-1439-x
Herrera-Foessel. 2015	Herrera-Foessel SA, Singh RP, Lan CX, Huerta-Espino J, Calvo-Salazar V, Bansal UK, Bariana HS, Lagudah ES (2015) Yr60, a gene conferring moderate resistance to stripe rust in wheat. Plant Dis 99:508–511. https://doi.org/10.1094/PDIS-08-14-0796-RE
Hou et al. 2015	Hou L, Chen X, Wang M, See DR, Chao S, Bulli P, Jing J (2015) Mapping a large number of QTL for durable resistance to stripe rust in winter wheat Druchamp using SSR and SNP markers. PLoS One 10:e0126794. https://doi.org/10.1371/journal.pone.0126794
Hou et al. 2023	Hou S, Wu F, Wang Z, Yan N, Chen H, Li H, Yang P, Zhang Y, Li C, Lin Y, Ma J, Huang L, Liu Y (2023) Mapping stripe rust resistance QTL in ‘N2496’, a synthetic hexaploid wheat derivative. Plant Dis 107:443–449. https://doi.org/10.1094/PDIS-07-22-1518-RE
Huang et al. 2019	Huang S, Wu J, Wang X, Mu J, Xu Z, Zeng Q, Liu S, Wang Q, Kang Z, Han D (2019) Utilization of the genomewide wheat 55K SNP array for genetic analysis of stripe rust resistance in common wheat line P9936. Phytopathology® 109:819–827. https://doi.org/10.1094/PHYTO-10-18-0388-R
Huang et al. 2021	Huang S, Liu S, Zhang Y, Xie Y, Wang X, Jiao H, Wu S, Zeng Q, Wang Q, Singh RP, Bhavani S, Kang Z, Wang C, Han D, Wu J (2021) Genome-wide wheat 55K SNP-based mapping of stripe rust resistance loci in wheat cultivar Shaannong 33 and their alleles frequencies in current Chinese wheat cultivars and breeding lines. Plant Dis 105:1048–1056. https://doi.org/10.1094/PDIS-07-20-1516-RE
Huang et al. 2022	Huang S, Zhang Y, Ren H, Li X, Zhang X, Zhang Z, Zhang C, Liu S, Wang X, Zeng Q, Wang Q, Singh RP, Bhavani S, Wu J, Han D, Kang Z (2022) Epistatic interaction effect between chromosome 1BL (Yr29) and a novel locus on 2AL facilitating resistance to stripe rust in Chinese wheat Changwu 357-9. Theor Appl Genet 135:2501–2513. https://doi.org/10.1007/s00122-022-04133-9
Huang et al. 2024	Huang, M., Liu, T., Yao, Y., Chen, W., Hou, W., & Huang, L. (2025). Genome-wide association studies of stripe rust resistance in spring wheat landraces from Northwest China. Plant Disease, (ja).
Juliana et al. 2020	Juliana, P., Singh, R. P., Huerta-Espino, J., Bhavani, S., Randhawa, M. S., Kumar, U., ... & Singh, G. P. (2020). Genome-wide mapping and allelic fingerprinting provide insights into the genetics of resistance to wheat stripe rust in India, Kenya and Mexico. Scientific Reports, 10(1), 10908.
Khan et al. 2024	Khan, H., Krishnappa, G., Kumar, S., Devate, N. B., Rathan, N. D., Kumar, S., ... & Singh, G. (2024). Genome-wide association study identifies novel loci and candidate genes for rust resistance in wheat (Triticum aestivum L.). BMC Plant Biology, 24(1), 411.
Klymiuk et al. 2018	Klymiuk V, Yaniv E, Huang L, Raats D, Fatiukha A, Chen S, Feng L, Frenkel Z, Krugman T, Lidzbarsky G, Chang W, Jääskeläinen MJ, Schudoma C, Paulin L, Laine P, Bariana H, Sela H, Saleem K, Sørensen CK, et al (2018) Cloning of the wheat Yr15 resistance gene sheds light on the plant tandem kinase-pseudokinase family. Nat Commun 9:3735. https://doi.org/10.1038/s41467-018-06138-9
Klymiuk et al. 2022	Klymiuk V, Chawla HS, Wiebe K, Ens J, Fatiukha A, Govta L, Fahima T, Pozniak CJ (2022) Discovery of stripe rust resistance with incomplete dominance in wild emmer wheat using bulked segregant analysis sequencing. Commun Biol 5:826. https://doi.org/10.1038/s42003-022-03773-3
Kumar et al. 2020	Kumar, D., Kumar, A., Chhokar, V., Gangwar, O. P., Bhardwaj, S. C., Sivasamy, M., ... & Tiwari, R. (2020). Genome-wide association studies in diverse spring wheat panel for stripe, stem, and leaf rust resistance. Frontiers in Plant Science, 11, 748.
Lan et al. 2017	Lan C, Hale IL, Herrera-Foessel SA, Basnet BR, Randhawa MS, Huerta-Espino J, Dubcovsky J, Singh RP (2017) Characterization and mapping of leaf rust and stripe rust resistance loci in hexaploid wheat lines UC1110 and PI610750 under Mexican environments. Front Plant Sci 8: 1450. https://doi.org/10.3389/fpls.2017.01450
Li et al. 2017b	Li H, Wang Q, Xu L, Mu J, Wu J, Zeng Q, Yu S, Huang L, Han D, Kang Z (2017b) Rapid identification of a major effect QTL conferring adult plant resistance to stripe rust in wheat cultivar Yaco“S.” Euphytica 213:124. https://doi.org/10.1007/s10681-017-1912-6
Lin and Chen 2009	Lin F, Chen XM (2009) Quantitative trait loci for non-race-specific, high-temperature adult-plant resistance to stripe rust in wheat cultivar Express. Theor Appl Genet 118:631–642. https://doi.org/10.1007/s00122-008-0894-0
Liu et al. 2020	Liu, L., Wang, M., Zhang, Z., See, D. R., & Chen, X. (2020). Identification of stripe rust resistance loci in US spring wheat cultivars and breeding lines using genome-wide association mapping and Yr gene markers. Plant Disease, 104(8), 2181-2192.
Ma et al. 2019	Ma J, Qin N, Cai B, Chen G, Ding P, Zhang H, Yang C, Huang L, Mu Y, Tang H, Liu Y, Wang J, Qi P, Jiang Q, Zheng Y, Liu C, Lan X, Wei Y (2019) Identification and validation of a novel major QTL for all-stage stripe rust resistance on 1BL in the winter wheat line 20828. Theor Appl Genet 132:1363–1373. https://doi.org/10.1007/s00122-019-03283-7
Maccaferri et al. 2015	Maccaferri M, Mantovani P, Tuberosa R, DeAmbrogio E, Giuliani S, Demontis A, Massi A, Sanguineti MC (2008) A major QTL for durable leaf rust resistance widely exploited in durum wheat breeding programs maps on the distal region of chromosome arm 7BL. Theor Appl Genet 117:1225–1240. https://doi.org/10.1007/s00122-008-0857-5
Mahmood et al. 2022	Mahmood, Z., Ali, M., Mirza, J. I., Fayyaz, M., Majeed, K., Naeem, M. K., ... & He, Z. (2022). Genome-wide association and genomic prediction for stripe rust resistance in synthetic-derived wheats. Frontiers in Plant Science, 13, 788593.
Mallard et al. 2005	Mallard S, Gaudet D, Aldeia A, Abelard C, Besnard AL, Sourdille P, Dedryver F (2005) Genetic analysis of durable resistance to yellow rust in bread wheat. Theor Appl Genet 110:1401–1409. https://doi.org/10.1007/s00122-005-1954-3
Marais et al. 2005	Marais GF, Badenhorst PE, Eksteen A, Pretorius ZA (2010a) Reduction of Aegilops sharonensis chromatin associated with resistance genes Lr56 and Yr38 in wheat. Euphytica 171:15–22. https://doi.org/10.1007/s10681-009-9973-9
Marchal et al. 2018	Marchal C, Zhang J, Zhang P, Fenwick P, Steuernagel B, Adamski NM, Boyd L, McIntosh R, Wulff BBH, Berry S, Lagudah E, Uauy C (2018) BED-domain-containing immune receptors confer diverse resistance spectra to yellow rust. Nat Plants 4:662–668. https://doi.org/10.1038/s41477-018-0236-4
Melichar et al. 2008	Melichar JPE, Berry S, Newell C, MacCormack R, Boyd LA (2008) QTL identification and microphenotype characterisation of the developmentally regulated yellow rust resistance in the UK wheat cultivar Guardian. Theor Appl Genet 117:391–399. https://doi.org/10.1007/s00122-008-0783-6
Mu et al. 2019	Mu J, Huang S, Liu S, Zeng Q, Dai M, Wang Q, Wu J, Yu S, Kang Z, Han D (2019) Genetic architecture of wheat stripe rust resistance revealed by combining QTL mapping using SNP-based genetic maps and bulked segregant analysis. Theor Appl Genet 132:443–455. https://doi.org/10.1007/s00122-018-3231-2
Muhammad et al. 2020	Muhammad, S., Sajjad, M., Khan, S. H., Shahid, M., Zubair, M., Awan, F. S., ... & Rehman, A. U. (2020). Genome-wide association analysis for stripe rust resistance in spring wheat (Triticum aestivum L.) germplasm. Journal of Integrative Agriculture, 19(8), 2035-2043.
Muleta et al. 2017	Muleta, K. T., Bulli, P., Rynearson, S., Chen, X., & Pumphrey, M. (2017). Loci associated with resistance to stripe rust (Puccinia striiformis f. sp. tritici) in a core collection of spring wheat (Triticum aestivum). PloS one, 12(6), e0179087.
Paillard et al. 2012	Paillard S, Trotoux-Verplancke G, Perretant M-R, Mohamadi F, Leconte M, Coëdel S, de Vallavieille-Pope C, Dedryver F (2012) Durable resistance to stripe rust is due to three specific resistance genes in French bread wheat cultivar Apache. Theor Appl Genet 125:955–965. https://doi.org/10.1007/s00122-012-1885-8
Pakeerathan et al. 2019	Pakeerathan K, Bariana H, Qureshi N, Wong D, Hayden M, Bansal U (2019) Identification of a new source of stripe rust resistance Yr82 in wheat. Theor Appl Genet 132:3169–3176. https://doi.org/10.1007/s00122-019-03416-y
Pang et al. 2022	Pang Y, Liu C, Lin M, Ni F, Li W, Cai J, Zhang Z, Zhu H, Liu J, Wu J, Bai G, Liu S (2022) Mapping QTL for adult-plant resistance to stripe rust in a Chinese wheat landrace. Int J Mol Sci 23:9662. https://doi.org/10.3390/ijms23179662
Powell et al. 2013	Powell NM, Lewis CM, Berry ST, MacCormack R, Boyd LA (2013) Stripe rust resistance genes in the UK winter wheat cultivar Claire. Theor Appl Genet 126:1599–1612. https://doi.org/10.1007/s00122-013-2077-x
Pretorius et al. 2017	Pretorius ZA, Lan CX, Prins R, Knight V, McLaren NW, Singh RP, Bender CM, Kloppers FJ (2017) Application of remote sensing to identify adult plant resistance loci to stripe rust in two bread wheat mapping populations. Precis Agric 18:411–428. https://doi.org/10.1007/s11119-016-9461-x
Prins et al. 2011	Prins R, Pretorius ZA, Bender CM, Lehmensiek A (2011) QTL mapping of stripe, leaf and stem rust resistance genes in a Kariega × Avocet S doubled haploid wheat population. Mol Breeding 27:259–270. https://doi.org/10.1007/s11032-010-9428-y
Ramburan et al. 2004	Ramburan VP, Pretorius ZA, Louw JH, Boyd LA, Smith PH, Boshoff WHP, Prins R (2004) A genetic analysis of adult plant resistance to stripe rust in the wheat cultivar Kariega. Theor Appl Genet 108:1426–1433. https://doi.org/10.1007/s00122-003-1567-7
Randhawa et al. 2015	Randhawa MS, Bariana HS, Mago R, Bansal UK (2015) Mapping of a new stripe rust resistance locus Yr57 on chromosome 3BS of wheat. Mol Breeding 35:65. https://doi.org/10.1007/s11032-015-0270-0
Ren et al. 2012a	Ren RS, Wang MN, Chen XM, Zhang ZJ (2012a) Characterization and molecular mapping of Yr52 for high-temperature adult-plant resistance to stripe rust in spring wheat germplasm PI 183527. Theor Appl Genet 125:847–857. https://doi.org/10.1007/s00122-012-1877-8
Ren et al. 2012b	Ren Y, He Z, Li J, Lillemo M, Wu L, Bai B, Lu Q, Zhu H, Zhou G, Du J, Lu Q, Xia X (2012b) QTL mapping of adult-plant resistance to stripe rust in a population derived from common wheat cultivars Naxos and Shanghai 3/Catbird. Theor Appl Genet 125:1211–1221. https://doi.org/10.1007/s00122-012-1907-6
Ren et al. 2012c	Ren Y, Li Z, He Z, Wu L, Bai B, Lan C, Wang C, Zhou G, Zhu H, Xia X (2012c) QTL mapping of adult-plant resistances to stripe rust and leaf rust in Chinese wheat cultivar Bainong 64. Theor Appl Genet 125:1253–1262. https://doi.org/10.1007/s00122-012-1910-y
[truncated: 34 more rows]

## Sheet: Supplementary Table S5
Supplementary Table S5: Comparison of identified peak markers in this study with previously published studies for LR.
[truncated: 403 more rows]

[truncated: 2 more sheets: Supplementary Table S6, Supplementary Table S7]
