# Supplementary material
Source: Research Square preprint supplement (doi:10.21203/rs.3.rs-9475098/v1)
Supplement: Supplementary file 1 [file f5816b783f27ef5f5f156b64.docx]

**Supplementary Figures and Tables:**

**Supplementary Figure 1:** Distribution of genotypes across each cluster, separately.

**Supplementary Figure 2:** QQ-plot of comparison of different GWAS methods based on P values.

**Supplementary Table S1:** List of 1984 genotypes used in this study with information about Origin, continent, years of acquisition, growth habit and sample status for YR and LR.

**Supplementary Table S2:** List of calculated MSD values based on P value for YR and LR.

**Supplementary Table S3:** List of all identified markers using TASSEL, GAPIT, FARMCPU and GenABEL for YR and LR.

**Supplementary Table S4:** Comparison of identified peak markers in this study with previously published studies for YR.

**Supplementary Table S5**: Comparison of identified peak markers in this study with previously published studies for LR.

**Supplementary Table S6**: List of all identified HC in vicinity of significant markers detected by TASSEL, GAPIT, FARMCPU, and GenABEL for YR.

**Supplementary Table S7**: List of all identified HC in vicinity of significant markers detected by TASSEL, GAPIT, FARMCPU, and GenABELfor LR.
