# Supplementary material
Source: Research Square preprint supplement (doi:10.21203/rs.3.rs-9475098/v1)
Supplement: Supplementary file 2 [file 6f10f0f2762d1aa2c2756af8.xlsx]

## Sheet: Supplementary Figure 1
Supplementary Figure 1: Distribution of genotypes across each cluster, separately.

## Sheet: Supplementary Figure 2
Supplementary Figure 2: QQ-plot of comparison of different GWAS methods based on P values.
